# Supplementary material
Source: MDPI journal article supplement (https://www.mdpi.com/2410-3888/7/6/322)
Supplement: s1 [file s1]

Archive with 5 entries (5 files):
- Supplementary figures.pdf
- Table S1.pdf
- Table S2.pdf
- Table S3.xls
- Table S4.xlsx
