# Supplementary material
Source: MDPI journal article supplement (https://www.mdpi.com/2410-3888/7/6/322)
Supplement: s1 [file s1 › Table S3.xls]

## Sheet: diff_detail_Brain
Gene_id	Log2FC(B_4n/B_2n)	Pvalue	Padjust	Significant	Regulate	B_2n	B_4n	NR description	swissprot
TRINITY_DN38700_c0_g1	-2.03159	0	0	yes	down	355.63	102.71	XP_018944692.1(PREDICTED: intelectin-like isoform X1 [Cyprinus carpio])	gi|825168629|sp|P0DMV4.1|ITLN_ONCMY(RecName: Full=Intelectin; Short=RTInt; Flags: Precursor)
TRINITY_DN42846_c0_g1	-11.962	0	0	yes	down	71.26	0.06	XP_018965506.1(PREDICTED: uncharacterized protein LOC109096331 [Cyprinus carpio])	None
TRINITY_DN33540_c3_g1	12.8803	0	0	yes	up	0	881.61	None	None
TRINITY_DN48799_c3_g1	1.11702	0	0	yes	up	386.4	856.16	XP_022541363.1(uncharacterized protein LOC111196389 [Astyanax mexicanus])	None
TRINITY_DN47332_c3_g2	2.27028	0	0	yes	up	88.77	448.33	YP_008815862.1(NADH dehydrogenase subunit 6 (mitochondrion) [Misgurnus bipartitus])	gi|464251|sp|P34196.1|NU6M_FORLA(RecName: Full=NADH-ubiquinone oxidoreductase chain 6; AltName: Full=NADH dehydrogenase subunit 6 (mitochondrion) [Formosania lacustris])
TRINITY_DN42816_c7_g1	-3.40078	0	0	yes	down	421.26	50.46	None	None
TRINITY_DN20241_c1_g1	3.91942	0	0	yes	up	3.35	53.11	BAF43305.1(glyceraldehyde 3-phosphate dehydrogenase [Misgurnus anguillicaudatus])	gi|123918122|sp|Q5XJ10.2|G3P_DANRE(RecName: Full=Glyceraldehyde-3-phosphate dehydrogenase; Short=GAPDH; AltName: Full=Peptidyl-cysteine S-nitrosylase GAPDH)
TRINITY_DN21697_c0_g2	3.61635	0	0	yes	up	1.5	19.31	XP_016374033.1(PREDICTED: receptor tyrosine-protein kinase erbB-3-like [Sinocyclocheilus rhinocerous])	gi|119534|sp|P21860.1|ERBB3_HUMAN(RecName: Full=Receptor tyrosine-protein kinase erbB-3; AltName: Full=Proto-oncogene-like protein c-ErbB-3; AltName: Full=Tyrosine kinase-type cell surface receptor HER3; Flags: Precursor)
TRINITY_DN28406_c0_g1	-4.38493	0	0	yes	down	1397.84	60.39	None	None
TRINITY_DN38761_c2_g1	-4.24761	0	0	yes	down	54.5	3.07	None	None
TRINITY_DN30332_c2_g1	-7.45626	0	0	yes	down	52.5	0.43	XP_018971467.1(PREDICTED: uncharacterized protein LOC109102519 isoform X1 [Cyprinus carpio])	None
TRINITY_DN34538_c2_g1	12.5128	0	0	yes	up	0	570.47	YP_008815851.1(NADH dehydrogenase subunit 1 (mitochondrion) [Misgurnus bipartitus])	gi|6647593|sp|O78679.1|NU1M_CARAU(RecName: Full=NADH-ubiquinone oxidoreductase chain 1; AltName: Full=NADH dehydrogenase subunit 1 (mitochondrion) [Carassius auratus])
TRINITY_DN47774_c0_g1	-1.4776	0	0	yes	down	196.54	72.95	XP_018944692.1(PREDICTED: intelectin-like isoform X1 [Cyprinus carpio])	gi|825168629|sp|P0DMV4.1|ITLN_ONCMY(RecName: Full=Intelectin; Short=RTInt; Flags: Precursor)
TRINITY_DN48799_c1_g1	1.23091	0	0	yes	up	246.75	609.9		gi|82582284|sp|Q6CQE5.2|TAR1_KLULA(RecName: Full=Protein TAR1)
TRINITY_DN48797_c5_g1	-5.03121	0	0	yes	down	21.97	0.69	XP_019129042.1(PREDICTED: uncharacterized protein LOC109141784 [Larimichthys crocea])	gi|134083|sp|P21328.1|RTJK_DROME(RecName: Full=RNA-directed DNA polymerase from mobile element jockey; AltName: Full=Reverse transcriptase)
TRINITY_DN48639_c2_g2	1.17586	0	0	yes	up	88.72	203.33	AFM85458.1(hypothetical protein [Callorhinchus milii])	None
TRINITY_DN45092_c3_g2	-2.93524	0	0	yes	down	135.72	25.43	XP_016306211.1(PREDICTED: uncharacterized protein LOC107661227 [Sinocyclocheilus anshuiensis])	gi|464864|sp|P35072.1|TCB1_CAEBR(RecName: Full=Transposable element Tcb1 transposase; AltName: Full=Transposable element Barney transposase)
TRINITY_DN35555_c2_g1	-3.41963	0	0	yes	down	164.69	11.12	XP_021172948.1(peptidyl-tRNA hydrolase ICT1, mitochondrial isoform X1 [Fundulus heteroclitus])	gi|464865|sp|Q04202.1|TCB2_CAEBR(RecName: Full=Transposable element Tcb2 transposase)
TRINITY_DN28500_c2_g1	6.65688	0	0	yes	up	0.52	55.11	APZ76665.1(myosin light chain 2 [Misgurnus mizolepis])	gi|127176|sp|P02608.3|MLRS_RABIT(RecName: Full=Myosin regulatory light chain 2, skeletal muscle isoform type 2; AltName: Full=DTNB; AltName: Full=Fast skeletal myosin light chain 2; Short=G2; Short=MLC-2)
TRINITY_DN40083_c2_g1	5.90484	0	0	yes	up	1.04	67.17	KTG42271.1(hypothetical protein cypCar_00000358, partial [Cyprinus carpio])	gi|125303|sp|P05123.3|KCRM_CANFA(RecName: Full=Creatine kinase M-type; AltName: Full=Creatine kinase M chain; AltName: Full=M-CK)
TRINITY_DN22172_c0_g1	13.3923	0	0	yes	up	0	4419.91	ACF93164.1(cytochrome oxidase subunit I (mitochondrion) [Misgurnus anguillicaudatus])	gi|231844|sp|P29646.1|COX1_GOMVA(RecName: Full=Cytochrome c oxidase subunit 1; AltName: Full=Cytochrome c oxidase polypeptide I)
TRINITY_DN44455_c0_g2	-1.35125	0	0	yes	down	2288.35	939.94	AAM93491.2(proopiomelanocortin [Danio rerio])	gi|14194543|sp|Q9YGK5.1|COLI2_CYPCA(RecName: Full=Pro-opiomelanocortin-2; Short=POMC-2; AltName: Full=Corticotropin-lipotropin 2; AltName: Full=Corticotropin-lipotropin II; AltName: Full=Pro-opiomelanocortin II; Short=POMC II; Contains: RecName: Full=Corticotropin; AltName: Full=Adrenocorticotropic hormone; Short=ACTH; Contains: RecName: Full=Melanotropin alpha; AltName: Full=Alpha-MSH; Contains:…
TRINITY_DN24953_c0_g1	12.6837	0	0	yes	up	0.37	2573.19	AEG25638.1(cytochrome oxidase subunit II, partial (mitochondrion) [Misgurnus anguillicaudatus])	gi|1352153|sp|P48171.1|COX2_ONCMY(RecName: Full=Cytochrome c oxidase subunit 2; AltName: Full=Cytochrome c oxidase polypeptide II)
TRINITY_DN40445_c1_g2	-2.99456	0	0	yes	down	598.34	80.16	XP_016300414.1(PREDICTED: somatolactin-like [Sinocyclocheilus anshuiensis])	gi|134727|sp|P20362.1|SOML_PAROL(RecName: Full=Somatolactin; Short=SL; Flags: Precursor [Paralichthys olivaceus])
TRINITY_DN27516_c1_g6	14.9923	0	0	yes	up	0	608.05	YP_008815860.1(NADH dehydrogenase subunit 4 (mitochondrion) [Misgurnus bipartitus])	gi|6647611|sp|O78687.1|NU4M_CARAU(RecName: Full=NADH-ubiquinone oxidoreductase chain 4; AltName: Full=NADH dehydrogenase subunit 4)
TRINITY_DN37753_c1_g1	-2.72572	0	0	yes	down	287.18	58.31	None	None
TRINITY_DN35627_c0_g1	14.6736	0	0	yes	up	0	1144.93	ADF28237.1(cytochrome b, partial (mitochondrion) [Misgurnus cf. mohoity IJ-2010])	gi|30912889|sp|Q94SD0.1|CYB_DACPE(RecName: Full=Cytochrome b; AltName: Full=Complex III subunit 3; AltName: Full=Complex III subunit III; AltName: Full=Cytochrome b-c1 complex subunit 3; AltName: Full=Ubiquinol-cytochrome-c reductase complex cytochrome b subunit)
TRINITY_DN40659_c0_g2	-1.69301	0	0	yes	down	4415.61	1400.52	Q90399.1(RecName: Full=Ependymin; Short=EPD; Flags: Precursor)	gi|2494357|sp|Q90399.1|EPD_DEVAE(RecName: Full=Ependymin; Short=EPD; Flags: Precursor [Devario aequipinnatus])
TRINITY_DN29441_c2_g3	1.76305	0	0	yes	up	483.93	1130.62	YP_008815852.1(NADH dehydrogenase subunit 2 (mitochondrion) [Misgurnus bipartitus])	gi|462763|sp|P34187.1|NU2M_FORLA(RecName: Full=NADH-ubiquinone oxidoreductase chain 2; AltName: Full=NADH dehydrogenase subunit 2)
TRINITY_DN49214_c15_g1	2.49702	0	0	yes	up	4.55	31.14	XP_018949504.1(PREDICTED: uncharacterized protein LOC109078753 [Cyprinus carpio])	gi|400821|sp|P31792.1|POL_FENV1(RecName: Full=Pol polyprotein; Contains: RecName: Full=Reverse transcriptase/ribonuclease H; Short=RT; Contains: RecName: Full=Integrase; Short=IN)
TRINITY_DN25323_c4_g1	-7.17741	0	0	yes	down	44.5	0.28	XP_010772090.1(PREDICTED: uncharacterized protein LOC104947713 isoform X5 [Notothenia coriiceps])	None
TRINITY_DN22319_c0_g1	-1.96603	0	0	yes	down	15119.9	3200.54	YP_008815855.1(ATP synthase F0 subunit 8 (mitochondrion) [Misgurnus bipartitus])	gi|6647447|sp|O78683.1|ATP8_CARAU(RecName: Full=ATP synthase protein 8; AltName: Full=A6L; AltName: Full=F-ATPase subunit 8)
TRINITY_DN31126_c2_g2	4.89916	0	0	yes	up	7.73	124.95	XP_021178877.1(actin, alpha cardiac-like [Fundulus heteroclitus])	gi|1703140|sp|P53479.1|ACTS_CYPCA(RecName: Full=Actin, alpha skeletal muscle; AltName: Full=Alpha-actin-1; Flags: Precursor)
TRINITY_DN31840_c0_g1	4.92645	0	0	yes	up	12.49	192.93	XP_016305132.1(PREDICTED: zonadhesin-like [Sinocyclocheilus anshuiensis])	gi|224471888|sp|Q9Y6R7.3|FCGBP_HUMAN(RecName: Full=IgGFc-binding protein; AltName: Full=Fcgamma-binding protein antigen; Short=FcgammaBP; Flags: Precursor)
TRINITY_DN49141_c7_g1	4.33781	3.1e-302	1.69e-299	yes	up	2.8	60.73	XP_019967578.1(PREDICTED: uncharacterized protein LOC109646289, partial [Paralichthys olivaceus])	gi|338819284|sp|O92815.2|POL_WDSV(RecName: Full=Gag-Pol polyprotein; Contains: RecName: Full=Matrix protein p10; Short=MA; Contains: RecName: Full=p20; Contains: RecName: Full=Capsid protein p25; Short=CA; Contains: RecName: Full=Nucleocapsid protein p14; Short=NC-pol; Contains: RecName: Full=Protease p15; Short=PR; Contains: RecName: Full=Reverse transcriptase/ribonuclease H p90; Short=RT; Conta…
TRINITY_DN41106_c1_g1	-3.84447	2.21e-299	1.18e-296	yes	down	24.68	1.8	XP_016142426.1(PREDICTED: protein-lysine 6-oxidase-like [Sinocyclocheilus grahami])	gi|1170846|sp|P16636.2|LYOX_RAT(RecName: Full=Protein-lysine 6-oxidase; AltName: Full=Lysyl oxidase; Flags: Precursor)
TRINITY_DN47580_c4_g3	3.09658	6.68e-299	3.49e-296	yes	up	5.15	46.17	XP_013883485.1(PREDICTED: uncharacterized protein LOC106532045 [Austrofundulus limnaeus])	None
TRINITY_DN32688_c0_g3	-2.49109	2.04e-298	1.04e-295	yes	down	16.06	2.94	XP_017297522.1(PREDICTED: G2/M phase-specific E3 ubiquitin-protein ligase-like [Kryptolebias marmoratus])	gi|114149932|sp|Q4R9C4.2|G2E3_MACFA(RecName: Full=G2/M phase-specific E3 ubiquitin-protein ligase)
TRINITY_DN45909_c0_g1	-3.52229	5.2e-283	2.57e-280	yes	down	353.71	40.58	None	None
TRINITY_DN34424_c3_g1	5.428	6.78e-272	3.23e-269	yes	up	0.57	25.6	AAY85353.1(fast skeletal myosin light chain 3, partial [Misgurnus fossilis])	gi|7994633|sp|P82160.1|MLE3_LIZRA(RecName: Full=Myosin light chain 3, skeletal muscle isoform; AltName: Full=LC-3; Short=LC3; AltName: Full=Myosin light chain alkali 2; Short=Myosin light chain A2)
TRINITY_DN34598_c0_g1	-6.39691	4.33e-269	2.03e-266	yes	down	6.12	0.08	XP_021324313.1(uncharacterized protein ftr06 isoform X1 [Danio rerio])	gi|146291076|sp|Q7LHG5.2|YI31B_YEAST(RecName: Full=Transposon Ty3-I Gag-Pol polyprotein; AltName: Full=Gag3-Pol3; AltName: Full=Transposon Ty3-2 TYA-TYB polyprotein; Contains: RecName: Full=Capsid protein; Short=CA; AltName: Full=p24; Contains: RecName: Full=Spacer peptide p3; Contains: RecName: Full=Nucleocapsid protein p11; Short=NC; Contains: RecName: Full=Ty3 protease; Short=PR; AltName: Full…
TRINITY_DN42985_c1_g1	-5.05307	5.26e-267	2.42e-264	yes	down	5.2	0.16	XP_021334418.1(interleukin-1 receptor accessory protein-like 1-A isoform X1 [Danio rerio])	gi|130407|sp|P10394.1|POL4_DROME(RecName: Full=Retrovirus-related Pol polyprotein from transposon 412; Includes: RecName: Full=Protease; Includes: RecName: Full=Reverse transcriptase; Includes: RecName: Full=Endonuclease)
TRINITY_DN27191_c1_g1	-7.77111	7.39e-256	3.35e-253	yes	down	21.82	0.09	XP_021324770.1(uncharacterized protein si:dkey-29d5.2 [Danio rerio])	None
TRINITY_DN49132_c9_g1	3.14702	2.02e-253	8.86e-251	yes	up	1.13	10.51	XP_017208743.1(myosin heavy chain, fast skeletal muscle [Danio rerio])	gi|13431711|sp|Q90339.2|MYSS_CYPCA(RecName: Full=Myosin heavy chain, fast skeletal muscle)
TRINITY_DN41471_c1_g2	4.02002	8.28e-252	3.57e-249	yes	up	38.07	746.2	None	None
TRINITY_DN35446_c1_g2	-10.8681	4.61e-244	1.96e-241	yes	down	84.13	0.05	None	None
TRINITY_DN23750_c1_g1	1.08309	1.18e-239	4.77e-237	yes	up	134.32	448.77	None	None
TRINITY_DN25450_c0_g1	4.84281	6.94e-236	2.73e-233	yes	up	1.87	56.21	AAO25757.1(parvalbumin, partial [Ictalurus punctatus])	gi|124012139|sp|P09227.2|PRVA_CYPCA(RecName: Full=Parvalbumin alpha; AltName: Full=A1)
TRINITY_DN43094_c1_g1	-2.07022	6.3e-229	2.45e-226	yes	down	27.79	10.32	XP_016353047.1(PREDICTED: uncharacterized protein LOC107696977 isoform X1 [Sinocyclocheilus anshuiensis])	gi|27734258|sp|Q9NTX9.1|F217B_HUMAN(RecName: Full=Protein FAM217B)
TRINITY_DN40363_c6_g1	2.81189	4.52e-225	1.68e-222	yes	up	1.97	14.47	NP_001071001.1(ATPase sarcoplasmic/endoplasmic reticulum Ca2+ transporting 1, like [Danio rerio])	gi|12643673|sp|P70083.2|AT2A1_MAKNI(RecName: Full=Sarcoplasmic/endoplasmic reticulum calcium ATPase 1; Short=SERCA1; Short=SR Ca(2+)-ATPase 1; AltName: Full=Calcium pump 1; AltName: Full=Calcium-transporting ATPase sarcoplasmic reticulum type, fast twitch skeletal muscle isoform; AltName: Full=Endoplasmic reticulum class 1/2 Ca(2+) ATPase)
TRINITY_DN25494_c2_g1	11.6281	2.8e-223	1.03e-220	yes	up	0	1968.73	AEG25638.1(cytochrome oxidase subunit II, partial (mitochondrion) [Misgurnus anguillicaudatus])	gi|6647486|sp|O78682.1|COX2_CARAU(RecName: Full=Cytochrome c oxidase subunit 2; AltName: Full=Cytochrome c oxidase polypeptide II)
TRINITY_DN32837_c1_g1	-8.68339	1.98e-219	7.07e-217	yes	down	9.08	0.02	XP_023662375.1(HMG domain-containing protein 3-like isoform X2 [Paramormyrops kingsleyae])	gi|160112910|sp|Q12766.2|HMGX3_HUMAN(RecName: Full=HMG domain-containing protein 3; AltName: Full=HMG box-containing protein 3; AltName: Full=Protein SMF)
TRINITY_DN48563_c9_g1	11.5742	3.51e-217	1.24e-214	yes	up	0	379.88	BAW88756.1(NADH dehydrogenase subunit 1 (mitochondrion) [Sewellia sp. ZF-12283])	gi|128638|sp|P24969.1|NU1M_CYPCA(RecName: Full=NADH-ubiquinone oxidoreductase chain 1; AltName: Full=NADH dehydrogenase subunit 1 (mitochondrion) [Cyprinus carpio])
TRINITY_DN24392_c1_g1	-11.9643	1.77e-216	6.16e-214	yes	down	38.95	0	XP_023662857.1(uncharacterized protein LOC111841387 isoform X2 [Paramormyrops kingsleyae])	gi|215274654|sp|A5PKF5.1|THA11_BOVIN(RecName: Full=THAP domain-containing protein 11)
TRINITY_DN49048_c5_g2	-1.63513	1.13e-212	3.83e-210	yes	down	16.03	5.32	XP_019124952.1(PREDICTED: uncharacterized protein LOC109140921 [Larimichthys crocea])	gi|130405|sp|P04323.1|POL3_DROME(RecName: Full=Retrovirus-related Pol polyprotein from transposon 17.6; Includes: RecName: Full=Protease; Includes: RecName: Full=Reverse transcriptase; Includes: RecName: Full=Endonuclease)
TRINITY_DN23005_c3_g2	-4.76892	2.68e-210	8.98e-208	yes	down	8.89	0.34	XP_023654811.1(zinc finger BED domain-containing protein 4-like [Paramormyrops kingsleyae])	gi|317373299|sp|O75132.2|ZBED4_HUMAN(RecName: Full=Zinc finger BED domain-containing protein 4)
TRINITY_DN42816_c7_g2	-2.61728	2.41e-205	7.98e-203	yes	down	106.77	13.95	NP_001153056.1(intelectin 3 precursor [Danio rerio])	gi|374110671|sp|P86928.1|INTLP_ALLMI(RecName: Full=Intelectin-like protein; AltName: Full=Mannose-specific lectin [Alligator mississippiensis])
TRINITY_DN22445_c3_g1	4.90656	1.93e-201	6.31e-199	yes	up	1.54	55.02	XP_012690600.1(PREDICTED: zonadhesin-like [Clupea harengus])	gi|2499181|sp|Q28983.1|ZAN_PIG(RecName: Full=Zonadhesin; Flags: Precursor)
TRINITY_DN30801_c1_g1	-5.0548	7.15e-196	2.29e-193	yes	down	88.22	3.55	None	None
TRINITY_DN47460_c3_g1	-3.51654	2.21e-194	6.99e-192	yes	down	5.14	0.47	XP_019218710.1(PREDICTED: uncharacterized protein LOC109203576 [Oreochromis niloticus])	gi|130407|sp|P10394.1|POL4_DROME(RecName: Full=Retrovirus-related Pol polyprotein from transposon 412; Includes: RecName: Full=Protease; Includes: RecName: Full=Reverse transcriptase; Includes: RecName: Full=Endonuclease)
TRINITY_DN30694_c0_g4	5.6466	4.74e-188	1.46e-185	yes	up	18.48	930.07	None	None
TRINITY_DN27054_c0_g1	-3.45555	1.23e-187	3.77e-185	yes	down	56.7	8.76	XP_018972602.1(PREDICTED: uncharacterized protein LOC109103698 [Cyprinus carpio])	None
TRINITY_DN47364_c2_g1	-2.48957	1.87e-184	5.59e-182	yes	down	6.39	1.19	XP_019219814.1(PREDICTED: uncharacterized protein LOC106098743 [Oreochromis niloticus])	gi|38258172|sp|Q8I7P9.1|POL5_DROME(RecName: Full=Retrovirus-related Pol polyprotein from transposon opus; Includes: RecName: Full=Protease; Includes: RecName: Full=Reverse transcriptase; Includes: RecName: Full=Endonuclease)
TRINITY_DN21753_c0_g2	-10.315	4.86e-182	1.42e-179	yes	down	20.55	0.02	XP_018946766.1(PREDICTED: uncharacterized protein LOC109075294 [Cyprinus carpio])	gi|82000294|sp|Q5UQV1.1|YR354_MIMIV(RecName: Full=Uncharacterized protein R354 [Acanthamoeba polyphaga mimivirus])
TRINITY_DN44235_c1_g1	-2.54153	7.15e-178	2.07e-175	yes	down	89.89	32.99	XP_016126124.1(PREDICTED: uncharacterized protein LOC107584155 isoform X1 [Sinocyclocheilus grahami])	None
TRINITY_DN23533_c3_g2	-1.96419	4.42e-175	1.27e-172	yes	down	320.65	85.96	None	None
TRINITY_DN41397_c0_g2	-5.95029	1.35e-173	3.81e-171	yes	down	46.48	0.62	KTG45659.1(hypothetical protein cypCar_00001792 [Cyprinus carpio])	gi|59799178|sp|O00478.1|BT3A3_HUMAN(RecName: Full=Butyrophilin subfamily 3 member A3; Flags: Precursor)
TRINITY_DN41673_c0_g1	-2.54297	5.57e-173	1.56e-170	yes	down	14.29	2.59	XP_023810365.1(uncharacterized protein LOC111947400 isoform X1 [Oryzias latipes])	None
TRINITY_DN44866_c0_g1	-6.18246	6.96e-172	1.93e-169	yes	down	10.7	2.43	XP_021322660.1(uncharacterized protein LOC108179640 [Danio rerio])	None
TRINITY_DN43724_c0_g4	-1.03893	2.84e-20	4.04e-19	yes	down	12.3	5.66	XP_018940807.1(PREDICTED: brain aromatase [Cyprinus carpio])	gi|3913347|sp|P79690.1|CP191_CARAU(RecName: Full=Brain aromatase; AltName: Full=CYPXIXA1; AltName: Full=Cytochrome P-450AROM; AltName: Full=Cytochrome P450 19 type 1; AltName: Full=Estrogen synthase [Carassius auratus])
TRINITY_DN48799_c3_g1	-1.40402	0	0	yes	down	836.26	299.32	XP_022541363.1(uncharacterized protein LOC111196389 [Astyanax mexicanus])	None
TRINITY_DN40610_c0_g3	-10.2008	3.03e-171	8.31e-169	yes	down	431.75	0.38	None	None
TRINITY_DN39466_c3_g2	-2.44995	1.23e-169	3.31e-167	yes	down	29.56	16.58	XP_018940737.1(PREDICTED: uncharacterized protein LOC109068379 [Cyprinus carpio])	None
TRINITY_DN48832_c4_g1	-1.35505	2.44e-169	6.51e-167	yes	down	560.12	182.11	AKP40998.1(ORF2 protein [Salmo salar])	gi|134083|sp|P21328.1|RTJK_DROME(RecName: Full=RNA-directed DNA polymerase from mobile element jockey; AltName: Full=Reverse transcriptase)
TRINITY_DN20953_c2_g1	-2.7098	1.02e-166	2.69e-164	yes	down	270.3	55.36	None	None
TRINITY_DN25151_c2_g2	-4.87364	1.24e-166	3.24e-164	yes	down	9.01	0.33	XP_021171028.1(uncharacterized protein LOC110368250 [Fundulus heteroclitus])	None
TRINITY_DN41168_c0_g1	-6.82341	1.92e-166	4.97e-164	yes	down	5.35	0.05	XP_015810099.1(PREDICTED: uncharacterized protein K02A2.6-like, partial [Nothobranchius furzeri])	gi|558446103|sp|P0CT41.1|TF212_SCHPO(RecName: Full=Transposon Tf2-12 polyprotein; AltName: Full=Retrotransposable element Tf2 155 kDa protein >gi|558446110|sp|P0CT36.1|TF23_SCHPO RecName: Full=Transposon Tf2-3 polyprotein; AltName: Full=Retrotransposable element Tf2 155 kDa protein >gi|558446114|sp|P0CT38.1|TF25_SCHPO RecName: Full=Transposon Tf2-5 polyprotein; AltName: Full=Retrotransposable ele…
TRINITY_DN37759_c1_g1	4.13518	1.17e-164	3.01e-162	yes	up	0.28	5.18	XP_019124952.1(PREDICTED: uncharacterized protein LOC109140921 [Larimichthys crocea])	gi|130407|sp|P10394.1|POL4_DROME(RecName: Full=Retrovirus-related Pol polyprotein from transposon 412; Includes: RecName: Full=Protease; Includes: RecName: Full=Reverse transcriptase; Includes: RecName: Full=Endonuclease)
TRINITY_DN47678_c1_g1	-2.92093	1.56e-164	3.97e-162	yes	down	6.46	0.69	XP_019218710.1(PREDICTED: uncharacterized protein LOC109203576 [Oreochromis niloticus])	gi|130407|sp|P10394.1|POL4_DROME(RecName: Full=Retrovirus-related Pol polyprotein from transposon 412; Includes: RecName: Full=Protease; Includes: RecName: Full=Reverse transcriptase; Includes: RecName: Full=Endonuclease)
TRINITY_DN40083_c1_g2	6.42083	2e-157	4.98e-155	yes	up	0.64	57.51	XP_005157650.1(creatine kinase M-type isoform X1 [Danio rerio])	gi|125305|sp|P06732.2|KCRM_HUMAN(RecName: Full=Creatine kinase M-type; AltName: Full=Creatine kinase M chain; AltName: Full=M-CK; Contains: RecName: Full=Creatine kinase M-type, N-terminally processed)
TRINITY_DN46107_c1_g1	1.25166	1.27e-155	3.15e-153	yes	up	8.96	15.49	XP_016349968.1(PREDICTED: striatin-3-like [Sinocyclocheilus anshuiensis])	gi|223634717|sp|Q13033.3|STRN3_HUMAN(RecName: Full=Striatin-3; AltName: Full=Cell cycle autoantigen SG2NA; AltName: Full=S/G2 antigen)
TRINITY_DN39731_c0_g1	-4.36669	6.18e-154	1.51e-151	yes	down	12.43	1.32	XP_005476600.2(PREDICTED: uncharacterized protein LOC102081651 [Oreochromis niloticus])	gi|74732341|sp|Q96MB7.1|HARB1_HUMAN(RecName: Full=Putative nuclease HARBI1; AltName: Full=Harbinger transposase-derived nuclease)
TRINITY_DN41693_c1_g1	10.8688	1.29e-150	3.1e-148	yes	up	0	216.22	YP_008815862.1(NADH dehydrogenase subunit 6 (mitochondrion) [Misgurnus bipartitus])	gi|6647613|sp|O78689.1|NU6M_CARAU(RecName: Full=NADH-ubiquinone oxidoreductase chain 6; AltName: Full=NADH dehydrogenase subunit 6 (mitochondrion) [Carassius auratus])
TRINITY_DN45092_c3_g1	-2.91454	1.29e-145	3.07e-143	yes	down	126.99	17.63	XP_016306211.1(PREDICTED: uncharacterized protein LOC107661227 [Sinocyclocheilus anshuiensis])	None
TRINITY_DN42931_c1_g1	-4.24353	3.3e-143	7.8e-141	yes	down	33.77	2.73	XP_018953452.1(PREDICTED: uncharacterized protein LOC109083084 [Cyprinus carpio])	None
TRINITY_DN42910_c0_g1	3.40159	4.49e-142	1.05e-139	yes	up	3.54	18.88	XP_022517729.1(uncharacterized protein LOC111188278 isoform X1 [Astyanax mexicanus])	None
TRINITY_DN46922_c2_g1	3.28109	1.15e-140	2.66e-138	yes	up	0.36	3.87	XP_021332670.1(uncharacterized protein LOC110439859 [Danio rerio])	gi|38258172|sp|Q8I7P9.1|POL5_DROME(RecName: Full=Retrovirus-related Pol polyprotein from transposon opus; Includes: RecName: Full=Protease; Includes: RecName: Full=Reverse transcriptase; Includes: RecName: Full=Endonuclease)
TRINITY_DN49120_c4_g1	-3.27057	1.2e-140	2.77e-138	yes	down	8.47	0.55	XP_016111874.1(PREDICTED: uncharacterized protein LOC107570181 [Sinocyclocheilus grahami])	None
TRINITY_DN30170_c0_g2	-6.34737	6.75e-140	1.54e-137	yes	down	9.56	0.1	XP_018967286.1(PREDICTED: uncharacterized protein LOC109098126 [Cyprinus carpio])	None
TRINITY_DN26147_c0_g4	-6.54059	5.44e-139	1.23e-136	yes	down	45.86	0.29	XP_016114429.1(PREDICTED: uncharacterized protein LOC107572525 [Sinocyclocheilus grahami])	None
TRINITY_DN21656_c0_g1	-3.08966	6.28e-138	1.4e-135	yes	down	210.89	28.27	XP_016306211.1(PREDICTED: uncharacterized protein LOC107661227 [Sinocyclocheilus anshuiensis])	None
TRINITY_DN49159_c7_g1	-2.64548	3.79e-133	8.23e-131	yes	down	4	0.67	XP_008293872.1(PREDICTED: uncharacterized protein LOC103367573 [Stegastes partitus])	gi|38258172|sp|Q8I7P9.1|POL5_DROME(RecName: Full=Retrovirus-related Pol polyprotein from transposon opus; Includes: RecName: Full=Protease; Includes: RecName: Full=Reverse transcriptase; Includes: RecName: Full=Endonuclease)
TRINITY_DN19758_c0_g1	-2.39647	9.3e-133	2e-130	yes	down	206.99	36.61	BAE46429.1(ORF2-encoded protein, partial [Danio rerio])	None
TRINITY_DN23299_c0_g1	-2.89445	1.17e-131	2.49e-129	yes	down	1442.68	191.05	CAP58999.1(cytochrome b, partial (mitochondrion) [Cobitis sinensis])	gi|461895|sp|P34875.1|CYB_SPHTV(RecName: Full=Cytochrome b; AltName: Full=Complex III subunit 3; AltName: Full=Complex III subunit III; AltName: Full=Cytochrome b-c1 complex subunit 3; AltName: Full=Ubiquinol-cytochrome-c reductase complex cytochrome b subunit)
TRINITY_DN32052_c1_g1	-5.16502	8.48e-131	1.79e-128	yes	down	7.75	0.17	XP_018527098.1(PREDICTED: uncharacterized protein LOC108880168 [Lates calcarifer])	None
TRINITY_DN35779_c3_g3	1.19152	1.77e-130	3.71e-128	yes	up	402.59	957.96	None	None
TRINITY_DN41726_c1_g6	-3.59306	1.39e-129	2.88e-127	yes	down	132.69	11.5	None	None
TRINITY_DN40855_c1_g1	-1.32488	1.87e-129	3.84e-127	yes	down	288.06	102.52	XP_021164492.1(uncharacterized protein LOC110366622 [Fundulus heteroclitus])	None
TRINITY_DN34519_c1_g2	-6.22019	1.02e-128	2.08e-126	yes	down	15.86	0.21	None	None
TRINITY_DN43861_c0_g1	1.6424	1.83e-128	3.68e-126	yes	up	5.72	13.21	XP_021332211.1(uncharacterized protein LOC101886116 [Danio rerio])	gi|130407|sp|P10394.1|POL4_DROME(RecName: Full=Retrovirus-related Pol polyprotein from transposon 412; Includes: RecName: Full=Protease; Includes: RecName: Full=Reverse transcriptase; Includes: RecName: Full=Endonuclease)
TRINITY_DN36115_c0_g1	3.356	8.07e-128	1.61e-125	yes	up	4.12	44.19	XP_018966448.1(PREDICTED: tropomyosin beta chain-like isoform X5 [Cyprinus carpio])	gi|136087|sp|P13105.1|TPM1_RANTE(RecName: Full=Tropomyosin alpha-1 chain; AltName: Full=Alpha-tropomyosin; AltName: Full=Tropomyosin-1)
TRINITY_DN42210_c1_g1	-5.21063	2.45e-127	4.86e-125	yes	down	172.15	3.99	XP_004566894.1(uncharacterized protein C14orf93 homolog [Maylandia zebra])	None
TRINITY_DN38244_c5_g1	1.52065	3.23e-126	6.36e-124	yes	up	11.88	38.55	XP_016406551.1(PREDICTED: tropomyosin alpha-1 chain-like isoform X2 [Sinocyclocheilus rhinocerous])	gi|60390740|sp|P84335.1|TPM1_LIZAU(RecName: Full=Tropomyosin alpha-1 chain; AltName: Full=Alpha-tropomyosin; AltName: Full=Tropomyosin-1)
TRINITY_DN21907_c0_g2	-7.71598	8.57e-125	1.64e-122	yes	down	40.45	0.2	None	None
TRINITY_DN27055_c0_g2	-4.74883	5.65e-124	1.07e-121	yes	down	7.84	0.25	XP_020786317.1(uncharacterized protein LOC110165462 [Boleophthalmus pectinirostris])	gi|395398617|sp|Q99572.4|P2RX7_HUMAN(RecName: Full=P2X purinoceptor 7; Short=P2X7; AltName: Full=ATP receptor; AltName: Full=P2Z receptor; AltName: Full=Purinergic receptor)
TRINITY_DN36574_c0_g2	-2.75996	2.22e-121	4.16e-119	yes	down	95.27	13.09	NP_001122226.1(melanoma-derived growth regulatory protein precursor [Danio rerio])	gi|2498558|sp|Q28038.1|MIA_BOVIN(RecName: Full=Melanoma-derived growth regulatory protein; AltName: Full=Cartilage-derived retinoic acid-sensitive protein; Short=CD-RAP; AltName: Full=Melanoma inhibitory activity protein; Flags: Precursor)
TRINITY_DN36002_c1_g1	-1.57566	2.96e-120	5.47e-118	yes	down	218.94	85.41	None	None
TRINITY_DN27538_c0_g1	-10.8229	3.5e-120	6.42e-118	yes	down	31.02	0	XP_016380013.1(PREDICTED: vitelline membrane outer layer protein 1-like [Sinocyclocheilus rhinocerous])	gi|60390935|sp|Q7Z5L0.1|VMO1_HUMAN(RecName: Full=Vitelline membrane outer layer protein 1 homolog; Flags: Precursor)
TRINITY_DN45692_c0_g1	-4.23496	4.44e-120	8.1e-118	yes	down	3.58	0.58	XP_021327147.1(uncharacterized protein LOC110438608 [Danio rerio])	None
TRINITY_DN30834_c1_g2	-3.66602	4.68e-120	8.49e-118	yes	down	145.16	16.22	XP_021172948.1(peptidyl-tRNA hydrolase ICT1, mitochondrial isoform X1 [Fundulus heteroclitus])	gi|464864|sp|P35072.1|TCB1_CAEBR(RecName: Full=Transposable element Tcb1 transposase; AltName: Full=Transposable element Barney transposase)
TRINITY_DN44685_c0_g1	2.10636	8.72e-119	1.56e-116	yes	up	1.11	5.03	XP_021332670.1(uncharacterized protein LOC110439859 [Danio rerio])	gi|130407|sp|P10394.1|POL4_DROME(RecName: Full=Retrovirus-related Pol polyprotein from transposon 412; Includes: RecName: Full=Protease; Includes: RecName: Full=Reverse transcriptase; Includes: RecName: Full=Endonuclease)
TRINITY_DN38546_c3_g1	-6.8095	2.02e-118	3.59e-116	yes	down	8.96	0.09	XP_021175753.1(B-cell CLL/lymphoma 7 protein family member A isoform X2 [Fundulus heteroclitus])	None
TRINITY_DN30688_c1_g1	2.74335	1.39e-117	2.45e-115	yes	up	5.09	61.54	XP_024122537.1(uncharacterized protein LOC112143031 [Oryzias melastigma])	gi|60392921|sp|P11369.2|LORF2_MOUSE(RecName: Full=LINE-1 retrotransposable element ORF2 protein; Short=ORF2p; AltName: Full=Long interspersed element-1; Short=L1; AltName: Full=Retrovirus-related Pol polyprotein LINE-1; Includes: RecName: Full=Reverse transcriptase; Includes: RecName: Full=Endonuclease)
TRINITY_DN35202_c0_g1	-3.86306	2.33e-115	4.08e-113	yes	down	46.94	3.52	XP_016326356.1(PREDICTED: uncharacterized protein LOC107676347 [Sinocyclocheilus anshuiensis])	None
TRINITY_DN33263_c0_g2	-1.72195	2.49e-113	4.33e-111	yes	down	644.52	201.93	None	None
TRINITY_DN26009_c2_g2	3.37839	4.62e-113	8e-111	yes	up	37.75	417.21	None	None
TRINITY_DN29936_c1_g1	-6.45525	4.86e-113	8.35e-111	yes	down	62.19	0.85	None	None
TRINITY_DN25507_c3_g1	2.42083	1.8e-112	3.06e-110	yes	up	9.11	6.42	XP_014040080.1(PREDICTED: uncharacterized protein LOC106593263 [Salmo salar])	None
TRINITY_DN42816_c7_g1	3.8855	0	0	yes	up	74.3	866.09	None	None
TRINITY_DN41571_c1_g1	1.39109	3.74e-112	6.31e-110	yes	up	71.9	167.37	None	None
TRINITY_DN41750_c0_g1	-3.10022	2e-111	3.33e-109	yes	down	12.78	1.17	XP_022541374.1(uncharacterized protein LOC111196396 isoform X1 [Astyanax mexicanus])	None
TRINITY_DN49212_c18_g1	-1.75065	2.06e-111	3.4e-109	yes	down	5.96	1.54	XP_016341315.1(PREDICTED: uncharacterized protein LOC107688212 isoform X1 [Sinocyclocheilus anshuiensis])	gi|338819284|sp|O92815.2|POL_WDSV(RecName: Full=Gag-Pol polyprotein; Contains: RecName: Full=Matrix protein p10; Short=MA; Contains: RecName: Full=p20; Contains: RecName: Full=Capsid protein p25; Short=CA; Contains: RecName: Full=Nucleocapsid protein p14; Short=NC-pol; Contains: RecName: Full=Protease p15; Short=PR; Contains: RecName: Full=Reverse transcriptase/ribonuclease H p90; Short=RT; Conta…
TRINITY_DN36269_c0_g2	-10.6726	4.34e-111	7.1e-109	yes	down	15.98	0	XP_023805545.1(protein ALP1-like [Oryzias latipes])	gi|82180108|sp|Q5U538.1|HARB1_XENLA(RecName: Full=Putative nuclease HARBI1; AltName: Full=Harbinger transposase-derived nuclease)
TRINITY_DN42668_c1_g1	-4.1709	1.62e-110	2.64e-108	yes	down	81.84	4.52	None	None
TRINITY_DN19882_c3_g1	-6.47803	1.89e-109	3.05e-107	yes	down	116.24	1.16	None	None
TRINITY_DN28646_c0_g3	-2.65513	2.24e-109	3.6e-107	yes	down	179.17	20.88	BAE46429.1(ORF2-encoded protein, partial [Danio rerio])	None
TRINITY_DN25319_c0_g1	-4.11702	4.02e-109	6.43e-107	yes	down	37.83	2.58	XP_018953452.1(PREDICTED: uncharacterized protein LOC109083084 [Cyprinus carpio])	None
TRINITY_DN40202_c0_g1	-3.15074	1.34e-108	2.11e-106	yes	down	34.79	4.55	XP_018942129.1(PREDICTED: uncharacterized protein LOC109069977 [Cyprinus carpio])	None
TRINITY_DN42244_c1_g1	-3.15074	1.34e-108	2.11e-106	yes	down	31.36	4.37	XP_021331564.1(uncharacterized protein LOC110439709 [Danio rerio])	None
TRINITY_DN29226_c2_g1	-3.49371	1.78e-108	2.79e-106	yes	down	97.56	6.25	None	None
TRINITY_DN48818_c1_g1	-3.80819	1.64e-107	2.57e-105	yes	down	3.11	1.35	XP_018955047.1(PREDICTED: uncharacterized protein LOC109084860 isoform X1 [Cyprinus carpio])	gi|130405|sp|P04323.1|POL3_DROME(RecName: Full=Retrovirus-related Pol polyprotein from transposon 17.6; Includes: RecName: Full=Protease; Includes: RecName: Full=Reverse transcriptase; Includes: RecName: Full=Endonuclease)
TRINITY_DN48859_c4_g1	-4.13286	3.78e-107	5.87e-105	yes	down	2.67	0.16	XP_023698428.1(uncharacterized protein LOC111859709 [Paramormyrops kingsleyae])	gi|38258172|sp|Q8I7P9.1|POL5_DROME(RecName: Full=Retrovirus-related Pol polyprotein from transposon opus; Includes: RecName: Full=Protease; Includes: RecName: Full=Reverse transcriptase; Includes: RecName: Full=Endonuclease)
TRINITY_DN42210_c1_g2	-2.8192	4.1e-107	6.32e-105	yes	down	66.17	10.58	XP_016126148.1(PREDICTED: uncharacterized protein C14orf93 homolog [Sinocyclocheilus grahami])	None
TRINITY_DN30815_c2_g1	3.33598	6.14e-107	9.43e-105	yes	up	20.46	93.91	KKF27277.1(Protein PBMUCL2 [Larimichthys crocea])	None
TRINITY_DN21350_c1_g1	-10.5946	1.24e-106	1.9e-104	yes	down	10.06	0	XP_017324831.1(PREDICTED: transcription factor Adf-1-like [Ictalurus punctatus])	None
TRINITY_DN37063_c4_g1	5.47428	1.25e-106	1.9e-104	yes	up	0.18	8.5	XP_016356390.1(PREDICTED: troponin C, skeletal muscle-like [Sinocyclocheilus anshuiensis])	gi|14285798|sp|P81660.1|TNNC2_ANGAN(RecName: Full=Troponin C, skeletal muscle; Short=TNC)
TRINITY_DN42336_c2_g3	-5.57707	6.9e-104	1.04e-101	yes	down	17.2	0.3	XP_016426339.1(PREDICTED: eIF-2-alpha kinase activator GCN1-like [Sinocyclocheilus rhinocerous])	None
TRINITY_DN48799_c2_g2	1.04003	2.89e-103	4.33e-101	yes	up	93.68	198.83	XP_018546266.1(PREDICTED: uncharacterized protein LOC108892972, partial [Lates calcarifer])	gi|74630365|sp|Q8TGM7.1|ART2_YEAST(RecName: Full=Putative uncharacterized protein ART2; AltName: Full=Antisense to ribosomal RNA transcript protein 2)
TRINITY_DN24966_c0_g1	-2.02224	8.06e-103	1.2e-100	yes	down	16.69	4.37	KTF89051.1(hypothetical protein cypCar_00021373 [Cyprinus carpio])	gi|2494960|sp|Q90328.1|EDNRB_COTJA(RecName: Full=Endothelin B receptor; Short=ET-B; Short=ET-BR; AltName: Full=Endothelin receptor non-selective type)
TRINITY_DN39650_c0_g1	-1.90403	2.02e-102	3e-100	yes	down	5.23	1.47	XP_019218710.1(PREDICTED: uncharacterized protein LOC109203576 [Oreochromis niloticus])	gi|134034966|sp|Q99315.3|YG31B_YEAST(RecName: Full=Transposon Ty3-G Gag-Pol polyprotein; AltName: Full=Gag3-Pol3; AltName: Full=Transposon Ty3-1 TYA-TYB polyprotein; Contains: RecName: Full=Capsid protein; Short=CA; AltName: Full=p24; Contains: RecName: Full=Spacer peptide p3; Contains: RecName: Full=Nucleocapsid protein p11; Short=NC; Contains: RecName: Full=Ty3 protease; Short=PR; AltName: Full…
TRINITY_DN37434_c0_g2	-3.00391	2.34e-101	3.46e-99	yes	down	13.09	1.91	XP_019221140.1(PREDICTED: uncharacterized protein LOC102078279 [Oreochromis niloticus])	None
TRINITY_DN20065_c1_g2	2.11476	1.42e-96	2.07e-94	yes	up	209.52	574.29	XP_023185891.1(serine/arginine repetitive matrix protein 1-like [Xiphophorus maculatus])	None
TRINITY_DN23767_c0_g2	-10.4065	1.42e-96	2.07e-94	yes	down	26.34	0	XP_023663558.1(uncharacterized protein LOC111841793 [Paramormyrops kingsleyae])	None
TRINITY_DN24158_c2_g1	-1.1062	1.43e-95	2.06e-93	yes	down	377.97	211.73	XP_019215114.1(PREDICTED: RNA-directed DNA polymerase from mobile element jockey-like, partial [Oreochromis niloticus])	gi|134083|sp|P21328.1|RTJK_DROME(RecName: Full=RNA-directed DNA polymerase from mobile element jockey; AltName: Full=Reverse transcriptase)
TRINITY_DN34232_c1_g3	-2.4277	1.44e-95	2.06e-93	yes	down	16.86	2.08	XP_021331327.1(uncharacterized protein LOC108183900 isoform X1 [Danio rerio])	gi|160112910|sp|Q12766.2|HMGX3_HUMAN(RecName: Full=HMG domain-containing protein 3; AltName: Full=HMG box-containing protein 3; AltName: Full=Protein SMF)
TRINITY_DN40458_c0_g1	-4.64509	4.23e-94	5.95e-92	yes	down	3.42	0.1	XP_023207243.1(uncharacterized protein LOC102229526 isoform X1 [Xiphophorus maculatus])	gi|130405|sp|P04323.1|POL3_DROME(RecName: Full=Retrovirus-related Pol polyprotein from transposon 17.6; Includes: RecName: Full=Protease; Includes: RecName: Full=Reverse transcriptase; Includes: RecName: Full=Endonuclease)
TRINITY_DN28646_c0_g1	-2.63271	8.49e-94	1.18e-91	yes	down	123.02	29.31	AEG78356.1(reverse transcriptase-like protein, partial [Epinephelus coioides])	None
TRINITY_DN41204_c1_g1	-2.6956	3.49e-93	4.83e-91	yes	down	63.77	7.02	XP_015798918.1(PREDICTED: uncharacterized protein LOC107375078 [Nothobranchius furzeri])	None
TRINITY_DN32805_c3_g1	5.28289	3.52e-93	4.86e-91	yes	up	0.23	10.84	XP_022522241.1(phosphoglycerate mutase 2 [Astyanax mexicanus])	gi|130353|sp|P15259.3|PGAM2_HUMAN(RecName: Full=Phosphoglycerate mutase 2; AltName: Full=BPG-dependent PGAM 2; AltName: Full=Muscle-specific phosphoglycerate mutase; AltName: Full=Phosphoglycerate mutase isozyme M; Short=PGAM-M)
TRINITY_DN28929_c0_g1	3.20797	5.33e-93	7.31e-91	yes	up	2.56	35.53	XP_016356356.1(PREDICTED: extracellular matrix protein 2-like isoform X2 [Sinocyclocheilus anshuiensis])	gi|25008402|sp|O94769.1|ECM2_HUMAN(RecName: Full=Extracellular matrix protein 2; AltName: Full=Matrix glycoprotein SC1/ECM2; Flags: Precursor)
TRINITY_DN47580_c4_g1	4.01017	3.92e-92	5.36e-90	yes	up	4.14	71.7	None	None
TRINITY_DN38928_c0_g2	-3.96591	2.01e-90	2.73e-88	yes	down	7.92	1.21	XP_018922078.1(PREDICTED: uncharacterized protein LOC109048873 [Cyprinus carpio])	gi|82075465|sp|Q5F4A1.1|G2E3_CHICK(RecName: Full=G2/M phase-specific E3 ubiquitin-protein ligase)
TRINITY_DN22915_c0_g1	4.13885	7.73e-90	1.04e-87	yes	up	0.17	3.19	XP_016404892.1(PREDICTED: LOW QUALITY PROTEIN: uncharacterized protein K02A2.6-like [Sinocyclocheilus rhinocerous])	gi|134034966|sp|Q99315.3|YG31B_YEAST(RecName: Full=Transposon Ty3-G Gag-Pol polyprotein; AltName: Full=Gag3-Pol3; AltName: Full=Transposon Ty3-1 TYA-TYB polyprotein; Contains: RecName: Full=Capsid protein; Short=CA; AltName: Full=p24; Contains: RecName: Full=Spacer peptide p3; Contains: RecName: Full=Nucleocapsid protein p11; Short=NC; Contains: RecName: Full=Ty3 protease; Short=PR; AltName: Full…
TRINITY_DN49141_c7_g2	4.73771	1.1e-89	1.48e-87	yes	up	0.73	19.36	None	None
TRINITY_DN49179_c4_g1	1.0139	1.25e-89	1.68e-87	yes	up	6.99	14.83	XP_016113365.1(PREDICTED: girdin isoform X1 [Sinocyclocheilus grahami])	gi|147644956|sp|Q3V6T2.2|GRDN_HUMAN(RecName: Full=Girdin; AltName: Full=Akt phosphorylation enhancer; Short=APE; AltName: Full=Coiled-coil domain-containing protein 88A; AltName: Full=G alpha-interacting vesicle-associated protein; Short=GIV; AltName: Full=Girders of actin filament; AltName: Full=Hook-related protein 1; Short=HkRP1)
TRINITY_DN31714_c2_g3	1.22305	7.91e-89	1.05e-86	yes	up	26.58	64.89	KTF92146.1(hypothetical protein cypCar_00023096 [Cyprinus carpio])	gi|17378805|sp|P02686.3|MBP_HUMAN(RecName: Full=Myelin basic protein; Short=MBP; AltName: Full=Myelin A1 protein; AltName: Full=Myelin membrane encephalitogenic protein)
TRINITY_DN29659_c1_g3	1.03765	1.49e-88	1.96e-86	yes	up	491.81	1043.54	XP_022541363.1(uncharacterized protein LOC111196389 [Astyanax mexicanus])	gi|1351218|sp|P47226.1|TES_MOUSE(RecName: Full=Testin; AltName: Full=TES1/TES2)
TRINITY_DN23501_c0_g1	-4.79788	2.49e-88	3.26e-86	yes	down	8.48	0.33	XP_016118714.1(PREDICTED: uncharacterized protein LOC107577117 [Sinocyclocheilus grahami])	None
TRINITY_DN28729_c0_g1	-5.21098	3.56e-88	4.63e-86	yes	down	8.62	0.09	XP_020514699.1(uncharacterized protein LOC110003528 [Labrus bergylta])	None
TRINITY_DN35717_c1_g1	1.38082	6.38e-88	8.26e-86	yes	up	21.84	33.32	NP_001035445.1(peripheral myelin protein 22 [Danio rerio])	gi|130339|sp|P25094.1|PMP22_RAT(RecName: Full=Peripheral myelin protein 22; Short=PMP-22; AltName: Full=Protein CD25; AltName: Full=SR13 myelin protein; AltName: Full=Schwann cell membrane glycoprotein; Short=SAG)
TRINITY_DN24652_c0_g2	-8.97939	7.18e-88	9.25e-86	yes	down	95.53	0.1	None	None
TRINITY_DN48520_c4_g1	-2.78949	2.17e-87	2.77e-85	yes	down	6.34	0.84	XP_023207243.1(uncharacterized protein LOC102229526 isoform X1 [Xiphophorus maculatus])	gi|130407|sp|P10394.1|POL4_DROME(RecName: Full=Retrovirus-related Pol polyprotein from transposon 412; Includes: RecName: Full=Protease; Includes: RecName: Full=Reverse transcriptase; Includes: RecName: Full=Endonuclease)
TRINITY_DN30812_c0_g2	-3.48412	1.07e-86	1.36e-84	yes	down	243.27	24.23	None	None
TRINITY_DN19024_c0_g1	2.06792	4.75e-86	6e-84	yes	up	11.06	44.7	XP_016114611.1(PREDICTED: fatty acid-binding protein, intestinal-like [Sinocyclocheilus grahami])	gi|2494403|sp|Q91775.2|FABPI_XENLA(RecName: Full=Fatty acid-binding protein, intestinal; AltName: Full=Fatty acid-binding protein 2; AltName: Full=Intestinal-type fatty acid-binding protein; Short=I-FABP)
TRINITY_DN38790_c0_g1	-2.83567	1.64e-85	2.07e-83	yes	down	4.01	0.48	XP_023698428.1(uncharacterized protein LOC111859709 [Paramormyrops kingsleyae])	gi|38258172|sp|Q8I7P9.1|POL5_DROME(RecName: Full=Retrovirus-related Pol polyprotein from transposon opus; Includes: RecName: Full=Protease; Includes: RecName: Full=Reverse transcriptase; Includes: RecName: Full=Endonuclease)
TRINITY_DN26814_c1_g4	-6.29988	1.7e-85	2.13e-83	yes	down	21.81	0.29	XP_018979920.1(PREDICTED: uncharacterized protein LOC109111435 [Cyprinus carpio])	None
TRINITY_DN40092_c1_g1	-3.26094	1.03e-84	1.27e-82	yes	down	7.85	0.36	XP_020780058.1(uncharacterized protein LOC110159790 [Boleophthalmus pectinirostris])	gi|52000774|sp|P63136.1|POK25_HUMAN(RecName: Full=Endogenous retrovirus group K member 25 Pol protein; AltName: Full=HERV-K_11q22.1 provirus ancestral Pol protein; Includes: RecName: Full=Reverse transcriptase; Short=RT; Includes: RecName: Full=Ribonuclease H; Short=RNase H; Includes: RecName: Full=Integrase; Short=IN)
TRINITY_DN39690_c0_g1	-3.6762	1.86e-84	2.3e-82	yes	down	124.12	10.18	None	None
TRINITY_DN24746_c0_g1	-2.99357	7.86e-84	9.67e-82	yes	down	48.72	31.27	ABL75886.1(protocadherin 2G11 [Takifugu rubripes])	gi|296439266|sp|Q9Y5H0.2|PCDG3_HUMAN(RecName: Full=Protocadherin gamma-A3; Short=PCDH-gamma-A3; Flags: Precursor)
TRINITY_DN25574_c0_g1	-4.24138	1.38e-83	1.69e-81	yes	down	4.1	3.09	XP_019110214.1(PREDICTED: uncharacterized protein LOC109137138 [Larimichthys crocea])	None
TRINITY_DN39052_c2_g1	-5.0172	1.76e-83	2.14e-81	yes	down	38.24	1.01	KTG32278.1(hypothetical protein cypCar_00047562, partial [Cyprinus carpio])	None
TRINITY_DN37535_c0_g2	-8.86523	1.9e-82	2.3e-80	yes	down	11.29	0.03	XP_022063315.1(uncharacterized protein LOC110960395 [Acanthochromis polyacanthus])	None
TRINITY_DN37714_c1_g4	4.36284	2.34e-82	2.81e-80	yes	up	0.47	8.7	KTG39862.1(hypothetical protein cypCar_00023900 [Cyprinus carpio])	gi|125608|sp|P00548.2|KPYM_CHICK(RecName: Full=Pyruvate kinase PKM)
TRINITY_DN37928_c0_g1	1.87455	7.52e-82	8.96e-80	yes	up	3.26	18.65	XP_018974531.1(PREDICTED: ectonucleoside triphosphate diphosphohydrolase 3-like [Cyprinus carpio])	gi|115311595|sp|O75355.2|ENTP3_HUMAN(RecName: Full=Ectonucleoside triphosphate diphosphohydrolase 3; Short=NTPDase 3; AltName: Full=CD39 antigen-like 3; AltName: Full=Ecto-ATP diphosphohydrolase 3; Short=Ecto-ATPDase 3; Short=Ecto-ATPase 3; AltName: Full=Ecto-apyrase 3; AltName: Full=HB6)
TRINITY_DN26710_c1_g1	2.35607	1.4e-81	1.66e-79	yes	up	6.25	34.76	None	None
TRINITY_DN27981_c1_g2	-1.01504	2.08e-81	2.44e-79	yes	down	183.25	100.59	BAE46429.1(ORF2-encoded protein, partial [Danio rerio])	None
TRINITY_DN20387_c1_g1	-4.60372	2.95e-81	3.45e-79	yes	down	6.12	0.19	XP_010776357.1(PREDICTED: zinc finger BED domain-containing protein 1-like [Notothenia coriiceps])	gi|41018380|sp|O96006.1|ZBED1_HUMAN(RecName: Full=Zinc finger BED domain-containing protein 1; AltName: Full=Putative Ac-like transposable element; AltName: Full=dREF homolog)
TRINITY_DN44077_c3_g1	3.19356	5.93e-81	6.91e-79	yes	up	1.46	13.99	XP_016361375.1(PREDICTED: troponin T, fast skeletal muscle isoforms-like isoform X5 [Sinocyclocheilus anshuiensis])	gi|1717773|sp|P06398.4|TNNT3_COTJA(RecName: Full=Troponin T, fast skeletal muscle isoforms)
TRINITY_DN21862_c1_g1	-3.13234	9.3e-81	1.08e-78	yes	down	99.05	16.5	None	None
TRINITY_DN37102_c1_g7	1.0956	1.06e-80	1.22e-78	yes	up	5.26	11.79	ADK35755.1(collagen type I alpha 1 [Ctenopharyngodon idella])	gi|152031574|sp|P02457.3|CO1A1_CHICK(RecName: Full=Collagen alpha-1(I) chain; AltName: Full=Alpha-1 type I collagen; Flags: Precursor)
TRINITY_DN47524_c1_g1	-2.70631	4.8e-80	5.48e-78	yes	down	11.95	0.61	XP_008283279.1(PREDICTED: uncharacterized protein LOC103359624 [Stegastes partitus])	gi|38258172|sp|Q8I7P9.1|POL5_DROME(RecName: Full=Retrovirus-related Pol polyprotein from transposon opus; Includes: RecName: Full=Protease; Includes: RecName: Full=Reverse transcriptase; Includes: RecName: Full=Endonuclease)
TRINITY_DN47332_c1_g3	9.67329	9.2e-80	1.05e-77	yes	up	0	210.79	YP_008815861.1(NADH dehydrogenase subunit 5 (mitochondrion) [Misgurnus bipartitus])	gi|6647638|sp|Q9ZZM3.1|NU5M_SALSA(RecName: Full=NADH-ubiquinone oxidoreductase chain 5; AltName: Full=NADH dehydrogenase subunit 5)
TRINITY_DN29954_c3_g2	-5.68769	4.68e-79	5.27e-77	yes	down	25.7	5.34	XP_019116772.1(PREDICTED: uncharacterized protein LOC109139026 [Larimichthys crocea])	gi|130551|sp|P16423.1|POLR_DROME(RecName: Full=Retrovirus-related Pol polyprotein from type-2 retrotransposable element R2DM; AltName: Full=Retrovirus-related Pol polyprotein from type II retrotransposable element R2DM; Includes: RecName: Full=Protease; Includes: RecName: Full=Reverse transcriptase; Includes: RecName: Full=Endonuclease [Drosophila melanogaster])
TRINITY_DN48898_c6_g1	-4.05471	3.07e-78	3.45e-76	yes	down	1.62	0.1	XP_023815816.1(uncharacterized protein LOC111948209, partial [Oryzias latipes])	gi|130407|sp|P10394.1|POL4_DROME(RecName: Full=Retrovirus-related Pol polyprotein from transposon 412; Includes: RecName: Full=Protease; Includes: RecName: Full=Reverse transcriptase; Includes: RecName: Full=Endonuclease)
TRINITY_DN19804_c0_g4	-3.46895	7.06e-78	7.9e-76	yes	down	365.44	32.35	ABQ59678.1(vacuolar protein sorting 52 [Salmo salar])	gi|464864|sp|P35072.1|TCB1_CAEBR(RecName: Full=Transposable element Tcb1 transposase; AltName: Full=Transposable element Barney transposase)
TRINITY_DN21007_c0_g4	4.64769	1.51e-77	1.68e-75	yes	up	6.83	298.06	AEM37693.1(GTP-binding nuclear protein, partial [Epinephelus bruneus])	None
TRINITY_DN23430_c1_g4	3.75425	2.75e-77	3.05e-75	yes	up	8.54	120.11	XP_023808666.1(uncharacterized protein LOC101166204 isoform X3 [Oryzias latipes])	None
TRINITY_DN49141_c7_g3	4.74771	9.46e-77	1.04e-74	yes	up	0.68	19.16	XP_021322172.1(uncharacterized protein LOC110437926 [Danio rerio])	None
TRINITY_DN29509_c2_g1	-2.79869	2.01e-76	2.2e-74	yes	down	63.85	8.54	None	None
TRINITY_DN20734_c0_g1	5.82149	4.09e-76	4.44e-74	yes	up	0.48	28.25	KTF87868.1(hypothetical protein cypCar_00034076 [Cyprinus carpio])	gi|127138|sp|P12829.3|MYL4_HUMAN(RecName: Full=Myosin light chain 4; AltName: Full=Myosin light chain 1, embryonic muscle/atrial isoform; AltName: Full=Myosin light chain alkali GT-1 isoform)
TRINITY_DN22405_c2_g1	-9.94643	1.22e-75	1.32e-73	yes	down	9.61	0	XP_022521892.1(uncharacterized protein LOC111191365 [Astyanax mexicanus])	gi|160112910|sp|Q12766.2|HMGX3_HUMAN(RecName: Full=HMG domain-containing protein 3; AltName: Full=HMG box-containing protein 3; AltName: Full=Protein SMF)
TRINITY_DN37728_c0_g1	-1.73211	2.7e-75	2.92e-73	yes	down	650.95	134.91	None	None
TRINITY_DN38465_c1_g2	3.32286	3.93e-75	4.22e-73	yes	up	1.56	16.36	XP_016114098.1(PREDICTED: tropomyosin beta chain isoform X1 [Sinocyclocheilus grahami])	gi|519668659|sp|P06753.2|TPM3_HUMAN(RecName: Full=Tropomyosin alpha-3 chain; AltName: Full=Gamma-tropomyosin; AltName: Full=Tropomyosin-3; AltName: Full=Tropomyosin-5; Short=hTM5)
TRINITY_DN42846_c0_g2	-9.932	4.64e-75	4.97e-73	yes	down	28.43	0	XP_016372999.1(PREDICTED: uncharacterized protein LOC107712301 [Sinocyclocheilus rhinocerous])	None
TRINITY_DN38146_c0_g1	2.68461	1.62e-74	1.72e-72	yes	up	51.03	200.18	None	None
TRINITY_DN44951_c0_g1	1.70059	3.6e-74	3.81e-72	yes	up	2.73	9.35	XP_019222776.1(PREDICTED: protein NYNRIN-like [Oreochromis niloticus])	gi|13959690|sp|P03356.2|POL_MLVAV(RecName: Full=Pol polyprotein; Contains: RecName: Full=Protease; Contains: RecName: Full=Reverse transcriptase/ribonuclease H; Short=RT; Contains: RecName: Full=Integrase; Short=IN)
TRINITY_DN32790_c1_g1	2.76445	7.82e-74	8.24e-72	yes	up	5.7	43.8	XP_018966616.1(PREDICTED: LOW QUALITY PROTEIN: F-box only protein 2-like [Cyprinus carpio])	gi|51315949|sp|Q80UW2.1|FBX2_MOUSE(RecName: Full=F-box only protein 2)
TRINITY_DN38786_c0_g1	2.04632	9.04e-74	9.49e-72	yes	up	18.62	84.94	None	None
TRINITY_DN30689_c2_g2	1.0033	1.54e-73	1.61e-71	yes	up	17.95	37.72	KTG33556.1(hypothetical protein cypCar_00002647 [Cyprinus carpio])	gi|82202213|sp|Q6NWF6.1|K2C8_DANRE(RecName: Full=Keratin, type II cytoskeletal 8; AltName: Full=Cytokeratin-8; Short=CK-8; AltName: Full=Keratin-8; Short=K8)
TRINITY_DN25151_c2_g1	-4.19745	1.57e-73	1.64e-71	yes	down	8.56	0.44	XP_022540701.1(uncharacterized protein LOC103027087 isoform X2 [Astyanax mexicanus])	None
TRINITY_DN39119_c0_g2	-5.08719	1.65e-73	1.71e-71	yes	down	15.53	0.61	None	None
TRINITY_DN42361_c1_g2	-2.93281	5.79e-73	5.98e-71	yes	down	16.53	6.35	None	None
TRINITY_DN25674_c2_g1	1.16143	2.11e-72	2.18e-70	yes	up	34.42	82.77	XP_024244208.1(actin, aortic smooth muscle-like [Oncorhynchus tshawytscha])	gi|51316969|sp|P62738.1|ACTA_RAT(RecName: Full=Actin, aortic smooth muscle; AltName: Full=Alpha-actin-2; Flags: Precursor >gi|51316972|sp|P62736.1|ACTA_HUMAN RecName: Full=Actin, aortic smooth muscle; AltName: Full=Alpha-actin-2; AltName: Full=Cell growth-inhibiting gene 46 protein; Flags: Precursor >gi|51316973|sp|P62737.1|ACTA_MOUSE RecName: Full=Actin, aortic smooth muscle; AltName: Full=Alpha…
TRINITY_DN39574_c0_g4	-3.26295	2.39e-72	2.45e-70	yes	down	3.14	0.34	XP_011607937.1(PREDICTED: uncharacterized protein K02A2.6-like [Takifugu rubripes])	gi|38258172|sp|Q8I7P9.1|POL5_DROME(RecName: Full=Retrovirus-related Pol polyprotein from transposon opus; Includes: RecName: Full=Protease; Includes: RecName: Full=Reverse transcriptase; Includes: RecName: Full=Endonuclease)
TRINITY_DN28432_c2_g1	-9.84996	7.74e-72	7.91e-70	yes	down	45.15	0	None	None
TRINITY_DN47510_c1_g1	-3.04811	3.88e-71	3.92e-69	yes	down	33.66	21.02	XP_016115624.1(PREDICTED: uncharacterized protein LOC107573690 [Sinocyclocheilus grahami])	None
TRINITY_DN48593_c6_g1	-1.73826	8.73e-71	8.78e-69	yes	down	3.84	1.21	XP_021323077.1(uncharacterized protein cuzd1.1 [Danio rerio])	gi|130405|sp|P04323.1|POL3_DROME(RecName: Full=Retrovirus-related Pol polyprotein from transposon 17.6; Includes: RecName: Full=Protease; Includes: RecName: Full=Reverse transcriptase; Includes: RecName: Full=Endonuclease)
TRINITY_DN27260_c2_g3	9.41887	1.74e-69	1.74e-67	yes	up	0	11.28	None	None
TRINITY_DN23870_c0_g2	2.57087	1.86e-69	1.86e-67	yes	up	3.54	17.3	DAA01994.1(TPA_exp: polyprotein [Danio rerio])	gi|110282985|sp|P23074.3|POL_SFV1(RecName: Full=Pro-Pol polyprotein; AltName: Full=Pr125Pol; Contains: RecName: Full=Protease/Reverse transcriptase/ribonuclease H; AltName: Full=p87Pro-RT-RNaseH; Contains: RecName: Full=Protease/Reverse transcriptase; AltName: Full=p65Pro-RT; Contains: RecName: Full=Ribonuclease H; Short=RNase H; Contains: RecName: Full=Integrase; Short=IN; AltName: Full=p42In)
TRINITY_DN41854_c2_g2	1.7213	2.87e-69	2.86e-67	yes	up	4.5	15.57	AAI54160.1(Kctd12.2 protein, partial [Danio rerio])	gi|50401124|sp|Q96CX2.1|KCD12_HUMAN(RecName: Full=BTB/POZ domain-containing protein KCTD12; AltName: Full=Pfetin; AltName: Full=Predominantly fetal expressed T1 domain)
TRINITY_DN20946_c0_g2	-5.71041	4.36e-69	4.33e-67	yes	down	6.48	0.13	XP_011610502.1(PREDICTED: putative nuclease HARBI1 [Takifugu rubripes])	gi|82181968|sp|Q6AZB8.1|HARB1_DANRE(RecName: Full=Putative nuclease HARBI1; AltName: Full=Harbinger transposase-derived nuclease)
TRINITY_DN44100_c0_g2	5.20105	8.75e-69	8.65e-67	yes	up	0.05	2.16	XP_023191398.1(uncharacterized protein LOC111608951 [Xiphophorus maculatus])	gi|130398|sp|P20825.1|POL2_DROME(RecName: Full=Retrovirus-related Pol polyprotein from transposon 297; Includes: RecName: Full=Protease; Includes: RecName: Full=Reverse transcriptase; Includes: RecName: Full=Endonuclease)
TRINITY_DN36264_c2_g1	-3.43892	1.96e-68	1.93e-66	yes	down	37.07	3.28	None	None
TRINITY_DN43785_c1_g2	2.75353	2.09e-68	2.05e-66	yes	up	0.75	5.29	XP_022625776.1(LOW QUALITY PROTEIN: uncharacterized protein LOC111240073 [Seriola dumerili])	gi|81945490|sp|Q89703.1|POL_CSVMV(RecName: Full=Putative enzymatic polyprotein; Includes: RecName: Full=Protease; Short=PR; Includes: RecName: Full=Reverse transcriptase; Short=RT; Includes: RecName: Full=Ribonuclease H [Cassava vein mosaic virus])
TRINITY_DN24168_c0_g1	-1.90191	7.67e-68	7.49e-66	yes	down	435.82	123.18	BAE46429.1(ORF2-encoded protein, partial [Danio rerio])	None
TRINITY_DN48208_c5_g2	-3.06174	1.85e-67	1.8e-65	yes	down	28.48	4.2	None	None
TRINITY_DN19504_c0_g1	7.02032	2.64e-67	2.56e-65	yes	up	0.25	35.89	XP_019967578.1(PREDICTED: uncharacterized protein LOC109646289, partial [Paralichthys olivaceus])	gi|338819284|sp|O92815.2|POL_WDSV(RecName: Full=Gag-Pol polyprotein; Contains: RecName: Full=Matrix protein p10; Short=MA; Contains: RecName: Full=p20; Contains: RecName: Full=Capsid protein p25; Short=CA; Contains: RecName: Full=Nucleocapsid protein p14; Short=NC-pol; Contains: RecName: Full=Protease p15; Short=PR; Contains: RecName: Full=Reverse transcriptase/ribonuclease H p90; Short=RT; Conta…
TRINITY_DN36198_c1_g1	-8.49995	3.9e-67	3.77e-65	yes	down	5.77	0.01	XP_022519226.1(uncharacterized protein LOC103022952 [Astyanax mexicanus])	None
TRINITY_DN36636_c0_g1	4.26796	4.36e-67	4.2e-65	yes	up	0.62	12.45	None	None
TRINITY_DN36377_c0_g1	1.80363	1.12e-66	1.07e-64	yes	up	1.97	5.73	AAI63934.1(Col2a1a protein [Danio rerio])	gi|115286|sp|P02460.1|CO2A1_CHICK(RecName: Full=Collagen alpha-1(II) chain; AltName: Full=Alpha-1 type II collagen; Flags: Precursor)
TRINITY_DN30673_c1_g3	-5.65363	1.8e-66	1.72e-64	yes	down	22.67	0.25	None	None
TRINITY_DN21969_c0_g1	-8.47529	3.32e-66	3.17e-64	yes	down	13.47	0.03	None	None
TRINITY_DN24576_c1_g1	-3.36488	1.04e-65	9.85e-64	yes	down	58.63	5.82	None	None
TRINITY_DN26075_c1_g2	-7.30044	2.08e-65	1.96e-63	yes	down	7.95	0.05	XP_020459380.1(putative nuclease HARBI1 [Monopterus albus])	gi|82181968|sp|Q6AZB8.1|HARB1_DANRE(RecName: Full=Putative nuclease HARBI1; AltName: Full=Harbinger transposase-derived nuclease)
TRINITY_DN18901_c0_g1	5.59083	4.38e-65	4.11e-63	yes	up	0.86	53.04	ABR19834.1(30C light meromyosin, partial [Ctenopharyngodon idella])	gi|13431711|sp|Q90339.2|MYSS_CYPCA(RecName: Full=Myosin heavy chain, fast skeletal muscle)
TRINITY_DN27602_c0_g2	-5.22019	4.62e-65	4.33e-63	yes	down	5.61	0.16	XP_019133297.1(PREDICTED: uncharacterized protein LOC109142849 isoform X2 [Larimichthys crocea])	None
TRINITY_DN38756_c0_g5	1.46039	9.66e-65	9.02e-63	yes	up	2.34	6.76	XP_016136266.1(PREDICTED: collagen alpha-2(I) chain-like [Sinocyclocheilus grahami])	gi|18202250|sp|O93484.2|CO1A2_ONCMY(RecName: Full=Collagen alpha-2(I) chain; AltName: Full=Alpha-2 type I collagen; Flags: Precursor)
TRINITY_DN45365_c1_g4	2.13806	1.87e-64	1.73e-62	yes	up	82.84	373.93	None	None
TRINITY_DN22166_c1_g5	6.9478	2.28e-64	2.1e-62	yes	up	0.03	3.47	XP_019206785.1(PREDICTED: RNA-directed DNA polymerase from mobile element jockey-like [Oreochromis niloticus])	gi|134083|sp|P21328.1|RTJK_DROME(RecName: Full=RNA-directed DNA polymerase from mobile element jockey; AltName: Full=Reverse transcriptase)
TRINITY_DN47332_c1_g1	9.27827	2.32e-64	2.13e-62	yes	up	0	235.48	BAJ11160.1(NADH dehydrogenase subunit-5 (mitochondrion) [Cobitis biwae])	gi|464246|sp|P34195.1|NU5M_FORLA(RecName: Full=NADH-ubiquinone oxidoreductase chain 5; AltName: Full=NADH dehydrogenase subunit 5)
TRINITY_DN25870_c3_g1	-4.56072	3.1e-64	2.83e-62	yes	down	10.39	0.46	XP_016414949.1(PREDICTED: uncharacterized protein LOC107745573 [Sinocyclocheilus rhinocerous])	None
TRINITY_DN23913_c0_g1	-3.59221	1.44e-63	1.31e-61	yes	down	87.25	7.6	None	None
TRINITY_DN45244_c0_g2	-2.23879	2.34e-62	2.12e-60	yes	down	12.66	1.99	XP_020516127.1(uncharacterized protein LOC110004991 [Labrus bergylta])	None
TRINITY_DN23615_c1_g2	-4.7851	3.81e-62	3.43e-60	yes	down	45.63	1.27	None	None
TRINITY_DN42017_c0_g1	1.53663	4.31e-62	3.87e-60	yes	up	1.31	3.98	XP_024662225.1(uncharacterized protein LOC106674641 [Maylandia zebra])	gi|38258172|sp|Q8I7P9.1|POL5_DROME(RecName: Full=Retrovirus-related Pol polyprotein from transposon opus; Includes: RecName: Full=Protease; Includes: RecName: Full=Reverse transcriptase; Includes: RecName: Full=Endonuclease)
TRINITY_DN41659_c0_g1	2.66042	5.23e-62	4.67e-60	yes	up	1.29	4.49	XP_020780058.1(uncharacterized protein LOC110159790 [Boleophthalmus pectinirostris])	gi|146291076|sp|Q7LHG5.2|YI31B_YEAST(RecName: Full=Transposon Ty3-I Gag-Pol polyprotein; AltName: Full=Gag3-Pol3; AltName: Full=Transposon Ty3-2 TYA-TYB polyprotein; Contains: RecName: Full=Capsid protein; Short=CA; AltName: Full=p24; Contains: RecName: Full=Spacer peptide p3; Contains: RecName: Full=Nucleocapsid protein p11; Short=NC; Contains: RecName: Full=Ty3 protease; Short=PR; AltName: Full…
TRINITY_DN24688_c2_g2	-5.14713	9.11e-62	8.12e-60	yes	down	3.82	0.1	KKF09339.1(RNA-directed DNA polymerase from mobile element jockey [Larimichthys crocea])	gi|74821373|sp|Q95SX7.1|RTBS_DROME(RecName: Full=Probable RNA-directed DNA polymerase from transposon BS; AltName: Full=Reverse transcriptase)
TRINITY_DN43457_c0_g1	-1.44501	9.72e-62	8.64e-60	yes	down	11.11	5.13	XP_016415172.1(PREDICTED: UPF0577 protein KIAA1324-like [Sinocyclocheilus rhinocerous])	gi|147647000|sp|Q6UXG2.2|K1324_HUMAN(RecName: Full=UPF0577 protein KIAA1324; AltName: Full=Estrogen-induced gene 121 protein; Flags: Precursor)
TRINITY_DN26569_c1_g3	-4.3223	1.71e-61	1.51e-59	yes	down	27.5	1.41	None	None
TRINITY_DN44208_c0_g1	-5.53059	4.16e-61	3.67e-59	yes	down	1.17	0.03	XP_021332670.1(uncharacterized protein LOC110439859 [Danio rerio])	gi|130407|sp|P10394.1|POL4_DROME(RecName: Full=Retrovirus-related Pol polyprotein from transposon 412; Includes: RecName: Full=Protease; Includes: RecName: Full=Reverse transcriptase; Includes: RecName: Full=Endonuclease)
TRINITY_DN28621_c4_g2	-2.97795	5.88e-61	5.17e-59	yes	down	8.99	0.94	XP_018932843.1(PREDICTED: uncharacterized protein LOC109060149 [Cyprinus carpio])	None
TRINITY_DN47943_c3_g2	-2.64547	7.05e-61	6.18e-59	yes	down	40.54	6.71	None	None
TRINITY_DN40562_c0_g1	-2.87596	2.2e-60	1.92e-58	yes	down	3.23	0.25	XP_023184170.1(uncharacterized protein LOC111606939 [Xiphophorus maculatus])	None
TRINITY_DN42745_c0_g1	-1.12975	3.92e-60	3.4e-58	yes	down	12.92	6.88	XP_017206939.1(glutamate receptor ionotropic, kainate 3 [Danio rerio])	gi|212276502|sp|Q13003.3|GRIK3_HUMAN(RecName: Full=Glutamate receptor ionotropic, kainate 3; Short=GluK3; AltName: Full=Excitatory amino acid receptor 5; Short=EAA5; AltName: Full=Glutamate receptor 7; Short=GluR-7; Short=GluR7; Flags: Precursor)
TRINITY_DN24273_c1_g1	5.46564	1.02e-59	8.81e-58	yes	up	0.46	30.27	None	None
TRINITY_DN34881_c1_g1	-3.44447	1.76e-59	1.51e-57	yes	down	25.64	2.72	XP_016107777.1(PREDICTED: uncharacterized protein LOC107566763, partial [Sinocyclocheilus grahami])	gi|82061579|sp|Q91DM0.1|POLG_PVCV1(RecName: Full=Genome polyprotein; Contains: RecName: Full=Movement protein; Short=MP; Contains: RecName: Full=Capsid protein; Short=CP; Contains: RecName: Full=Aspartic protease; Short=PR; Contains: RecName: Full=Reverse transcriptase; Short=RT [Petunia vein clearing virus isolate Shepherd])
TRINITY_DN28560_c0_g2	-6.49832	4.71e-59	4.03e-57	yes	down	79.68	0.62	None	None
TRINITY_DN47873_c2_g2	4.19401	7.28e-59	6.19e-57	yes	up	3.48	30.76	None	None
TRINITY_DN39811_c0_g1	-3.98409	7.99e-59	6.76e-57	yes	down	8.59	0.68	XP_018934441.1(PREDICTED: uncharacterized protein LOC109061806 [Cyprinus carpio])	None
TRINITY_DN41276_c0_g2	-2.09531	9.84e-59	8.3e-57	yes	down	420.63	118.18	None	None
TRINITY_DN46317_c0_g1	3.35913	9.99e-59	8.41e-57	yes	up	1.31	3.77	XP_014267405.2(uncharacterized protein LOC106676062 [Maylandia zebra])	gi|130405|sp|P04323.1|POL3_DROME(RecName: Full=Retrovirus-related Pol polyprotein from transposon 17.6; Includes: RecName: Full=Protease; Includes: RecName: Full=Reverse transcriptase; Includes: RecName: Full=Endonuclease)
TRINITY_DN22420_c0_g5	-4.5433	1.19e-58	9.96e-57	yes	down	23.09	6.65	XP_018921759.1(PREDICTED: uncharacterized protein LOC109048574 [Cyprinus carpio])	None
TRINITY_DN36143_c2_g1	-3.39341	1.41e-58	1.18e-56	yes	down	4.2	3.23	XP_018972455.1(PREDICTED: uncharacterized protein LOC109103503 [Cyprinus carpio])	gi|74738611|sp|Q7L622.1|G2E3_HUMAN(RecName: Full=G2/M phase-specific E3 ubiquitin-protein ligase)
TRINITY_DN23344_c0_g2	-2.11236	2.98e-58	2.49e-56	yes	down	31.17	8.61	XP_013879791.1(PREDICTED: uncharacterized protein LOC106529025, partial [Austrofundulus limnaeus])	None
TRINITY_DN45785_c0_g2	-1.50307	7.58e-58	6.3e-56	yes	down	12.67	5.17	XP_016430551.1(PREDICTED: sodium/calcium exchanger 2-like [Sinocyclocheilus rhinocerous])	gi|81878686|sp|Q8K596.1|NAC2_MOUSE(RecName: Full=Sodium/calcium exchanger 2; AltName: Full=Na(+)/Ca(2+)-exchange protein 2; AltName: Full=Solute carrier family 8 member 2; Flags: Precursor)
TRINITY_DN47645_c2_g3	-1.24996	3.11e-57	2.58e-55	yes	down	21.53	12.64	XP_018976689.1(PREDICTED: serine/threonine-protein kinase HT1-like isoform X2 [Cyprinus carpio])	gi|75070729|sp|Q5RAJ5.1|STK36_PONAB(RecName: Full=Serine/threonine-protein kinase 36; AltName: Full=Fused homolog)
TRINITY_DN27342_c0_g1	-8.20827	7.1e-57	5.87e-55	yes	down	12.29	0.04	None	None
TRINITY_DN28681_c1_g3	-3.07168	7.6e-57	6.26e-55	yes	down	6.56	0.82	XP_024656833.1(uncharacterized protein LOC112432544 [Maylandia zebra])	None
TRINITY_DN27607_c1_g2	4.74989	2.06e-56	1.69e-54	yes	up	1.7	57.02	XP_001339206.5(myosin heavy chain, fast skeletal muscle [Danio rerio])	gi|13431711|sp|Q90339.2|MYSS_CYPCA(RecName: Full=Myosin heavy chain, fast skeletal muscle)
TRINITY_DN41858_c0_g1	-3.93009	2.92e-56	2.38e-54	yes	down	5.89	0.27	XP_016345178.1(PREDICTED: uncharacterized protein LOC107691195 [Sinocyclocheilus anshuiensis])	None
TRINITY_DN21143_c4_g2	4.2334	3.31e-56	2.69e-54	yes	up	0.2	5.61	None	None
TRINITY_DN18155_c0_g1	1.9001	3.66e-56	2.97e-54	yes	up	19.51	76.23	None	None
TRINITY_DN30210_c0_g1	-9.38813	5.07e-56	4.09e-54	yes	down	29.77	0	None	None
TRINITY_DN29740_c3_g1	-3.92397	5.63e-56	4.52e-54	yes	down	3.14	0.22	XP_018964076.1(PREDICTED: uncharacterized protein LOC109094832 [Cyprinus carpio])	None
TRINITY_DN42761_c0_g3	3.81192	8.44e-56	6.77e-54	yes	up	1.2	6.63	XP_019201955.1(PREDICTED: coiled-coil domain-containing protein 8-like [Oreochromis niloticus])	None
TRINITY_DN38943_c0_g1	3.06627	9.12e-56	7.29e-54	yes	up	2.03	23.63	None	None
TRINITY_DN40575_c0_g8	4.9085	1.03e-55	8.2e-54	yes	up	0.1	3.28	XP_016111421.1(PREDICTED: uncharacterized protein LOC107569781 [Sinocyclocheilus grahami])	None
TRINITY_DN44083_c0_g1	-1.06496	1.11e-55	8.8e-54	yes	down	9.56	4.79	XP_017210639.2(uncharacterized protein K02A2.6-like [Danio rerio])	gi|146291076|sp|Q7LHG5.2|YI31B_YEAST(RecName: Full=Transposon Ty3-I Gag-Pol polyprotein; AltName: Full=Gag3-Pol3; AltName: Full=Transposon Ty3-2 TYA-TYB polyprotein; Contains: RecName: Full=Capsid protein; Short=CA; AltName: Full=p24; Contains: RecName: Full=Spacer peptide p3; Contains: RecName: Full=Nucleocapsid protein p11; Short=NC; Contains: RecName: Full=Ty3 protease; Short=PR; AltName: Full…
TRINITY_DN33705_c1_g1	-4.69871	2.81e-55	2.23e-53	yes	down	30.87	2.52	None	None
TRINITY_DN31918_c1_g2	6.69971	3.44e-55	2.72e-53	yes	up	0.71	68.1	XP_010872011.1(PREDICTED: creatine kinase M-type [Esox lucius])	gi|125306|sp|P07310.1|KCRM_MOUSE(RecName: Full=Creatine kinase M-type; AltName: Full=Creatine kinase M chain; AltName: Full=M-CK >gi|124056470|sp|P00564.2|KCRM_RAT RecName: Full=Creatine kinase M-type; AltName: Full=Creatine kinase M chain; AltName: Full=M-CK)
TRINITY_DN43132_c2_g1	-9.35066	6.78e-55	5.34e-53	yes	down	9.34	0	XP_016380412.1(PREDICTED: sodium/potassium-transporting ATPase subunit alpha-1-like [Sinocyclocheilus rhinocerous])	gi|114386|sp|P25489.1|AT1A1_CATCO(RecName: Full=Sodium/potassium-transporting ATPase subunit alpha-1; Short=Na(+)/K(+) ATPase alpha-1 subunit; AltName: Full=Sodium pump subunit alpha-1; Flags: Precursor)
TRINITY_DN32763_c0_g1	-3.73076	7.83e-55	6.13e-53	yes	down	1.72	0.1	XP_019221791.1(PREDICTED: uncharacterized protein LOC109204700 isoform X2 [Oreochromis niloticus])	gi|134034966|sp|Q99315.3|YG31B_YEAST(RecName: Full=Transposon Ty3-G Gag-Pol polyprotein; AltName: Full=Gag3-Pol3; AltName: Full=Transposon Ty3-1 TYA-TYB polyprotein; Contains: RecName: Full=Capsid protein; Short=CA; AltName: Full=p24; Contains: RecName: Full=Spacer peptide p3; Contains: RecName: Full=Nucleocapsid protein p11; Short=NC; Contains: RecName: Full=Ty3 protease; Short=PR; AltName: Full…
TRINITY_DN37032_c1_g2	-4.08979	2.72e-54	2.12e-52	yes	down	1.9	0.12	XP_019221790.1(PREDICTED: uncharacterized protein LOC109204700 isoform X1 [Oreochromis niloticus])	gi|130407|sp|P10394.1|POL4_DROME(RecName: Full=Retrovirus-related Pol polyprotein from transposon 412; Includes: RecName: Full=Protease; Includes: RecName: Full=Reverse transcriptase; Includes: RecName: Full=Endonuclease)
TRINITY_DN46065_c2_g1	-3.71246	5.56e-54	4.31e-52	yes	down	1.34	0.11	XP_016388549.1(PREDICTED: apolipoprotein B-100-like [Sinocyclocheilus rhinocerous])	gi|81894378|sp|Q7TMA5.1|APOB_RAT(RecName: Full=Apolipoprotein B-100; Short=Apo B-100; Contains: RecName: Full=Apolipoprotein B-48; Short=Apo B-48; Flags: Precursor)
TRINITY_DN31918_c1_g1	6.04293	1.09e-53	8.42e-52	yes	up	0.3	20.94	None	None
TRINITY_DN23927_c1_g1	-1.63268	2.59e-53	1.98e-51	yes	down	252.66	84.53	None	None
TRINITY_DN48176_c1_g1	-3.28973	2.81e-53	2.14e-51	yes	down	2.64	0.28	XP_016094273.1(PREDICTED: RNA-directed DNA polymerase from mobile element jockey-like [Sinocyclocheilus grahami])	gi|74821373|sp|Q95SX7.1|RTBS_DROME(RecName: Full=Probable RNA-directed DNA polymerase from transposon BS; AltName: Full=Reverse transcriptase)
TRINITY_DN38146_c0_g2	-1.08574	3.13e-53	2.38e-51	yes	down	196.5	134.3	None	None
TRINITY_DN26566_c0_g1	-9.2861	5.25e-53	3.97e-51	yes	down	41.16	0	None	None
TRINITY_DN48848_c4_g1	3.10375	7.11e-53	5.37e-51	yes	up	2.78	11.1	CBN81178.1(Pol polyprotein [Dicentrarchus labrax])	gi|558446103|sp|P0CT41.1|TF212_SCHPO(RecName: Full=Transposon Tf2-12 polyprotein; AltName: Full=Retrotransposable element Tf2 155 kDa protein >gi|558446110|sp|P0CT36.1|TF23_SCHPO RecName: Full=Transposon Tf2-3 polyprotein; AltName: Full=Retrotransposable element Tf2 155 kDa protein >gi|558446114|sp|P0CT38.1|TF25_SCHPO RecName: Full=Transposon Tf2-5 polyprotein; AltName: Full=Retrotransposable ele…
TRINITY_DN43672_c0_g3	1.62418	7.3e-53	5.49e-51	yes	up	4.46	17.85	KTG43871.1(hypothetical protein cypCar_00021950 [Cyprinus carpio])	None
TRINITY_DN19830_c2_g4	8.91408	1.06e-52	7.95e-51	yes	up	0	5.5	XP_021326364.1(uncharacterized protein si:dkey-81e3.2 [Danio rerio])	None
TRINITY_DN48689_c2_g1	6.01448	1.07e-52	8.01e-51	yes	up	0.01	0.5	XP_016355622.1(PREDICTED: LOW QUALITY PROTEIN: titin-like [Sinocyclocheilus anshuiensis])	gi|160358754|sp|A2ASS6.1|TITIN_MOUSE(RecName: Full=Titin; AltName: Full=Connectin)
TRINITY_DN25837_c3_g1	-9.26692	1.86e-52	1.38e-50	yes	down	16.61	0	None	None
TRINITY_DN34578_c0_g1	7.72321	2.23e-52	1.66e-50	yes	up	0.18	30.34	XP_016416313.1(PREDICTED: UPF0676 protein C1494.01-like [Sinocyclocheilus rhinocerous])	gi|212288568|sp|Q7LL04.2|YQK1_SCHPO(RecName: Full=UPF0676 protein C1494.01)
TRINITY_DN30799_c0_g1	-3.72961	2.27e-52	1.68e-50	yes	down	5.92	0.98	XP_018920045.1(PREDICTED: muellerian-inhibiting factor isoform X1 [Cyprinus carpio])	gi|6016575|sp|P79295.2|MIS_PIG(RecName: Full=Muellerian-inhibiting factor; AltName: Full=Anti-Muellerian hormone; Short=AMH; AltName: Full=Muellerian-inhibiting substance; Short=MIS; Flags: Precursor)
TRINITY_DN22936_c0_g2	-3.10104	2.56e-52	1.89e-50	yes	down	51.33	8.15	XP_018968585.1(PREDICTED: uncharacterized protein LOC109099527 [Cyprinus carpio])	gi|395398617|sp|Q99572.4|P2RX7_HUMAN(RecName: Full=P2X purinoceptor 7; Short=P2X7; AltName: Full=ATP receptor; AltName: Full=P2Z receptor; AltName: Full=Purinergic receptor)
TRINITY_DN22814_c0_g1	-5.55841	3.31e-52	2.43e-50	yes	down	42.03	0.56		gi|74644329|sp|Q8TGM6.1|TAR1_YEAST(RecName: Full=Protein TAR1; AltName: Full=Transcript antisense to ribosomal RNA protein 1)
TRINITY_DN49141_c6_g1	-3.52804	4.9e-52	3.58e-50	yes	down	5.3	0.44	AAI39611.1(Zgc:162621 protein [Danio rerio])	None
TRINITY_DN29607_c3_g2	-3.40091	7.89e-52	5.73e-50	yes	down	3.16	0.31	XP_016096907.1(PREDICTED: uncharacterized protein LOC107557855 [Sinocyclocheilus grahami])	gi|332319805|sp|P0CW18.1|PRS56_HUMAN(RecName: Full=Serine protease 56; Flags: Precursor)
TRINITY_DN29373_c1_g2	1.85968	9.22e-52	6.68e-50	yes	up	3.39	13.69	XP_009295379.1(protein-glutamine gamma-glutamyltransferase K-like [Danio rerio])	gi|57015359|sp|P22735.4|TGM1_HUMAN(RecName: Full=Protein-glutamine gamma-glutamyltransferase K; AltName: Full=Epidermal TGase; AltName: Full=Transglutaminase K; Short=TG(K); Short=TGK; Short=TGase K; AltName: Full=Transglutaminase-1; Short=TGase-1)
TRINITY_DN18457_c0_g1	4.48307	1.07e-51	7.73e-50	yes	up	0.39	8.88	NP_001093529.1(uncharacterized protein LOC797776 precursor [Danio rerio])	None
TRINITY_DN39673_c0_g4	1.58845	2.33e-51	1.67e-49	yes	up	17.85	34.12	XP_016137197.1(PREDICTED: uncharacterized protein LOC107592279 [Sinocyclocheilus grahami])	gi|399430|sp|P31796.1|ENV_AVISN(RecName: Full=Envelope glycoprotein; AltName: Full=Env polyprotein; Contains: RecName: Full=Surface protein; Short=SU; AltName: Full=Glycoprotein 73; Short=gp73; Contains: RecName: Full=Transmembrane protein; Short=TM; AltName: Full=Glycoprotein 22; Short=gp22; Flags: Precursor)
TRINITY_DN28418_c0_g1	5.96107	7.03e-51	5.04e-49	yes	up	0.24	17.5	None	None
TRINITY_DN46859_c2_g3	-2.61257	9.65e-51	6.9e-49	yes	down	5.23	0.41	XP_021331267.1(uncharacterized protein LOC110439519 [Danio rerio])	gi|130398|sp|P20825.1|POL2_DROME(RecName: Full=Retrovirus-related Pol polyprotein from transposon 297; Includes: RecName: Full=Protease; Includes: RecName: Full=Reverse transcriptase; Includes: RecName: Full=Endonuclease)
TRINITY_DN37994_c0_g1	-5.83453	1.08e-50	7.71e-49	yes	down	1.55	0.03	XP_005949918.2(PREDICTED: uncharacterized protein LOC102294560 [Haplochromis burtoni])	gi|130407|sp|P10394.1|POL4_DROME(RecName: Full=Retrovirus-related Pol polyprotein from transposon 412; Includes: RecName: Full=Protease; Includes: RecName: Full=Reverse transcriptase; Includes: RecName: Full=Endonuclease)
TRINITY_DN38105_c0_g1	-2.84931	1.73e-50	1.23e-48	yes	down	3	0.48	XP_022532175.1(uncharacterized protein LOC111193936 isoform X1 [Astyanax mexicanus])	None
TRINITY_DN21261_c2_g2	-6.24957	2.22e-50	1.57e-48	yes	down	4.19	0.28	ADJ80991.1(CR1-3 [Lycodichthys dearborni])	None
TRINITY_DN18793_c0_g1	5.93984	3.57e-50	2.52e-48	yes	up	1.49	1.75	XP_023816251.1(uncharacterized protein LOC111948290 [Oryzias latipes])	gi|558446103|sp|P0CT41.1|TF212_SCHPO(RecName: Full=Transposon Tf2-12 polyprotein; AltName: Full=Retrotransposable element Tf2 155 kDa protein >gi|558446110|sp|P0CT36.1|TF23_SCHPO RecName: Full=Transposon Tf2-3 polyprotein; AltName: Full=Retrotransposable element Tf2 155 kDa protein >gi|558446114|sp|P0CT38.1|TF25_SCHPO RecName: Full=Transposon Tf2-5 polyprotein; AltName: Full=Retrotransposable ele…
TRINITY_DN32993_c0_g2	-2.07194	6.45e-50	4.53e-48	yes	down	2.26	0.56	XP_014267405.2(uncharacterized protein LOC106676062 [Maylandia zebra])	gi|130405|sp|P04323.1|POL3_DROME(RecName: Full=Retrovirus-related Pol polyprotein from transposon 17.6; Includes: RecName: Full=Protease; Includes: RecName: Full=Reverse transcriptase; Includes: RecName: Full=Endonuclease)
TRINITY_DN47734_c1_g1	-2.14953	6.54e-50	4.58e-48	yes	down	2.37	1.68	XP_019203002.1(PREDICTED: uncharacterized protein LOC109195424 [Oreochromis niloticus])	gi|130407|sp|P10394.1|POL4_DROME(RecName: Full=Retrovirus-related Pol polyprotein from transposon 412; Includes: RecName: Full=Protease; Includes: RecName: Full=Reverse transcriptase; Includes: RecName: Full=Endonuclease)
TRINITY_DN25744_c3_g2	1.758	7.11e-50	4.96e-48	yes	up	52.72	174.9	None	None
TRINITY_DN48839_c2_g1	-1.15991	8.66e-50	6.01e-48	yes	down	5.26	2.47	XP_021327458.1(uncharacterized protein LOC110438689 [Danio rerio])	None
TRINITY_DN47764_c2_g1	-1.7439	1.1e-49	7.62e-48	yes	down	7.81	1.45	XP_016361688.1(PREDICTED: unconventional myosin-Vb isoform X3 [Sinocyclocheilus anshuiensis])	gi|122065591|sp|P21271.2|MYO5B_MOUSE(RecName: Full=Unconventional myosin-Vb)
TRINITY_DN48491_c4_g1	-1.34401	1.11e-49	7.66e-48	yes	down	3.59	1.48	XP_021332670.1(uncharacterized protein LOC110439859 [Danio rerio])	gi|38258172|sp|Q8I7P9.1|POL5_DROME(RecName: Full=Retrovirus-related Pol polyprotein from transposon opus; Includes: RecName: Full=Protease; Includes: RecName: Full=Reverse transcriptase; Includes: RecName: Full=Endonuclease)
TRINITY_DN37056_c0_g1	1.25771	1.15e-49	7.92e-48	yes	up	156.74	371.18	None	None
TRINITY_DN40855_c1_g2	-3.90808	1.29e-49	8.83e-48	yes	down	124	8.52	None	None
TRINITY_DN42481_c0_g1	1.15663	1.44e-49	9.87e-48	yes	up	33.17	86.71	CAD12793.1(MHC class I antigen [Cyprinus carpio])	None
TRINITY_DN29887_c2_g2	5.50552	1.82e-49	1.24e-47	yes	up	0.1	4.68	XP_016322403.1(PREDICTED: transmembrane channel-like protein 2 [Sinocyclocheilus anshuiensis])	gi|313104275|sp|Q8TDI7.3|TMC2_HUMAN(RecName: Full=Transmembrane channel-like protein 2; AltName: Full=Transmembrane cochlear-expressed protein 2)
TRINITY_DN33190_c1_g1	-3.90419	1.86e-49	1.27e-47	yes	down	13.99	0.82	XP_016427152.1(PREDICTED: uncharacterized protein LOC107755027 [Sinocyclocheilus rhinocerous])	None
TRINITY_DN28126_c2_g2	-4.83453	2.84e-49	1.92e-47	yes	down	6.33	0.26	KTF70954.1(hypothetical protein cypCar_00047141 [Cyprinus carpio])	None
TRINITY_DN16319_c0_g1	3.60079	3.23e-49	2.18e-47	yes	up	6.93	29.55	None	None
TRINITY_DN22881_c2_g1	-3.7101	4.1e-49	2.76e-47	yes	down	56	15.55	None	None
TRINITY_DN21369_c0_g2	3.66156	4.3e-49	2.89e-47	yes	up	0.42	5.61	NP_001008594.1(beta-tectorin precursor [Danio rerio])	gi|1729889|sp|P54097.1|TECTB_CHICK(RecName: Full=Beta-tectorin; Flags: Precursor)
TRINITY_DN48064_c2_g1	-1.83298	5.27e-49	3.52e-47	yes	down	47.55	7.39	ADN22949.1(complement factor I [Ctenopharyngodon idella])	gi|75041085|sp|Q5R5A4.1|CFAI_PONAB(RecName: Full=Complement factor I; AltName: Full=C3B/C4B inactivator; Contains: RecName: Full=Complement factor I heavy chain; Contains: RecName: Full=Complement factor I light chain; Flags: Precursor)
TRINITY_DN24957_c0_g4	5.17711	8.08e-49	5.37e-47	yes	up	0.39	11.77	XP_016100001.1(PREDICTED: myosin-7-like [Sinocyclocheilus grahami])	gi|3024204|sp|Q02566.2|MYH6_MOUSE(RecName: Full=Myosin-6; AltName: Full=Myosin heavy chain 6; AltName: Full=Myosin heavy chain, cardiac muscle alpha isoform; Short=MyHC-alpha)
TRINITY_DN19504_c0_g2	3.05196	9.7e-49	6.43e-47	yes	up	1.11	9.66	XP_024134368.1(uncharacterized protein LOC112150358, partial [Oryzias melastigma])	None
TRINITY_DN30123_c3_g2	1.75983	1.13e-48	7.44e-47	yes	up	3.82	13.58	XP_018965729.1(PREDICTED: ADP/ATP translocase 1 isoform X1 [Cyprinus carpio])	gi|399011|sp|P02722.3|ADT1_BOVIN(RecName: Full=ADP/ATP translocase 1; AltName: Full=ADP,ATP carrier protein 1; AltName: Full=ADP,ATP carrier protein, heart isoform T1; AltName: Full=Adenine nucleotide translocator 1; Short=ANT 1; AltName: Full=Solute carrier family 25 member 4)
TRINITY_DN42543_c1_g1	1.97457	1.17e-48	7.71e-47	yes	up	6.67	27.49	None	None
TRINITY_DN35428_c0_g1	-2.331	3.81e-48	2.49e-46	yes	down	4.28	1.21	XP_016090205.1(PREDICTED: integrin beta-3 [Sinocyclocheilus grahami])	gi|125987835|sp|P05106.2|ITB3_HUMAN(RecName: Full=Integrin beta-3; AltName: Full=Platelet membrane glycoprotein IIIa; Short=GPIIIa; AltName: CD_antigen=CD61; Flags: Precursor)
TRINITY_DN23759_c1_g4	-9.10916	3.85e-48	2.5e-46	yes	down	45.66	0	None	None
TRINITY_DN33917_c0_g2	-6.79658	4.24e-48	2.75e-46	yes	down	139.41	2.44	None	None
TRINITY_DN19209_c2_g1	3.3	1.19e-47	7.66e-46	yes	up	1.58	16.36	None	None
TRINITY_DN46569_c1_g1	-1.80538	1.46e-47	9.38e-46	yes	down	5.81	1.04	XP_021331267.1(uncharacterized protein LOC110439519 [Danio rerio])	gi|130405|sp|P04323.1|POL3_DROME(RecName: Full=Retrovirus-related Pol polyprotein from transposon 17.6; Includes: RecName: Full=Protease; Includes: RecName: Full=Reverse transcriptase; Includes: RecName: Full=Endonuclease)
TRINITY_DN41368_c1_g1	-3.06219	1.49e-47	9.56e-46	yes	down	43.66	4.31	XP_023808159.1(uncharacterized protein LOC111946929 [Oryzias latipes])	None
TRINITY_DN32730_c0_g1	-1.25461	1.89e-47	1.21e-45	yes	down	99.09	43.49	None	None
TRINITY_DN36685_c1_g1	-9.07674	2.69e-47	1.71e-45	yes	down	25.57	0	None	None
TRINITY_DN34079_c2_g2	-3.7765	5.72e-47	3.61e-45	yes	down	13.08	1.05	None	None
TRINITY_DN24506_c3_g1	-1.42245	6.67e-47	4.2e-45	yes	down	44.59	17.97	None	None
TRINITY_DN32152_c1_g1	-1.95472	7.46e-47	4.7e-45	yes	down	15.75	3.32	None	None
TRINITY_DN30210_c0_g2	-9.05693	8.67e-47	5.44e-45	yes	down	56.6	0	None	None
TRINITY_DN31859_c1_g2	-3.5433	1.26e-46	7.9e-45	yes	down	1.2	0.11	XP_019201078.1(PREDICTED: uncharacterized protein LOC106097162 [Oreochromis niloticus])	gi|130407|sp|P10394.1|POL4_DROME(RecName: Full=Retrovirus-related Pol polyprotein from transposon 412; Includes: RecName: Full=Protease; Includes: RecName: Full=Reverse transcriptase; Includes: RecName: Full=Endonuclease)
TRINITY_DN32058_c0_g7	3.07219	1.67e-46	1.04e-44	yes	up	0.55	4.83	None	None
TRINITY_DN32306_c0_g1	-7.85762	1.71e-46	1.07e-44	yes	down	4.35	0.05	XP_018980009.1(PREDICTED: uncharacterized protein LOC109111517 isoform X1 [Cyprinus carpio])	None
TRINITY_DN30053_c0_g1	-2.42033	3e-46	1.87e-44	yes	down	32.19	6.3	XP_018952128.1(PREDICTED: uncharacterized protein LOC109081593 isoform X1 [Cyprinus carpio])	None
TRINITY_DN41148_c0_g2	5.09005	6.73e-46	4.18e-44	yes	up	0.1	3.68	XP_017210494.1(myosin-binding protein C, slow-type isoform X2 [Danio rerio])	gi|6166597|sp|Q00872.2|MYPC1_HUMAN(RecName: Full=Myosin-binding protein C, slow-type; Short=Slow MyBP-C; AltName: Full=C-protein, skeletal muscle slow isoform)
TRINITY_DN41282_c0_g1	-3.88034	9.67e-46	5.97e-44	yes	down	10.89	0.77	None	None
TRINITY_DN47774_c0_g2	-2.87688	1.45e-45	8.93e-44	yes	down	9.08	0.91	None	None
TRINITY_DN25718_c3_g1	-1.80802	2.07e-45	1.27e-43	yes	down	10.11	2.98	XP_019209411.1(PREDICTED: uncharacterized protein LOC109198420 [Oreochromis niloticus])	gi|238690596|sp|B5XCB8.1|THAP1_SALSA(RecName: Full=THAP domain-containing protein 1)
TRINITY_DN41107_c1_g2	8.64461	2.12e-45	1.3e-43	yes	up	0	8.88	XP_017543432.1(PREDICTED: N-acylneuraminate cytidylyltransferase [Pygocentrus nattereri])	gi|68059546|sp|Q90WG6.1|NEUA_ONCMY(RecName: Full=N-acylneuraminate cytidylyltransferase; AltName: Full=CMP-N-acetylneuraminic acid synthase; Short=CMP-NeuNAc synthase)
TRINITY_DN22241_c0_g1	-5.6617	3.69e-45	2.25e-43	yes	down	16.78	0.35	XP_018981830.1(PREDICTED: C-C motif chemokine 18-like [Cyprinus carpio])	gi|62899844|sp|Q64H35.1|CCL26_CANFA(RecName: Full=C-C motif chemokine 26; AltName: Full=Eotaxin-3; AltName: Full=Small-inducible cytokine A26; Flags: Precursor)
TRINITY_DN48790_c6_g1	-1.60463	4e-45	2.43e-43	yes	down	4.88	1.65	XP_015811577.1(PREDICTED: uncharacterized protein LOC107383465 [Nothobranchius furzeri])	gi|134034966|sp|Q99315.3|YG31B_YEAST(RecName: Full=Transposon Ty3-G Gag-Pol polyprotein; AltName: Full=Gag3-Pol3; AltName: Full=Transposon Ty3-1 TYA-TYB polyprotein; Contains: RecName: Full=Capsid protein; Short=CA; AltName: Full=p24; Contains: RecName: Full=Spacer peptide p3; Contains: RecName: Full=Nucleocapsid protein p11; Short=NC; Contains: RecName: Full=Ty3 protease; Short=PR; AltName: Full…
TRINITY_DN33278_c0_g2	-2.3964	5.16e-45	3.12e-43	yes	down	77.73	18.11	None	None
TRINITY_DN30284_c1_g3	-1.47104	8.78e-45	5.28e-43	yes	down	4.59	1.74	XP_024122537.1(uncharacterized protein LOC112143031 [Oryzias melastigma])	gi|141475|sp|P14381.1|YTX2_XENLA(RecName: Full=Transposon TX1 uncharacterized 149 kDa protein; AltName: Full=ORF 2)
TRINITY_DN43695_c1_g1	2.44023	1.1e-44	6.61e-43	yes	up	6.7	27.16	XP_018934608.1(PREDICTED: sterile alpha motif domain-containing protein 3-like isoform X1 [Cyprinus carpio])	None
TRINITY_DN30559_c1_g2	3.37705	1.11e-44	6.64e-43	yes	up	5.82	27.42	None	None
TRINITY_DN41556_c2_g2	1.16807	1.26e-44	7.48e-43	yes	up	18.2	43.63	XP_018974602.1(PREDICTED: UDP-glucuronosyltransferase 2C1-like isoform X1 [Cyprinus carpio])	gi|549155|sp|P36537.1|UDB10_HUMAN(RecName: Full=UDP-glucuronosyltransferase 2B10; Short=UDPGT 2B10; Flags: Precursor)
TRINITY_DN33268_c2_g1	2.9913	1.77e-44	1.05e-42	yes	up	2.75	15.74	None	None
TRINITY_DN46382_c2_g1	2.45127	2.03e-44	1.2e-42	yes	up	0.65	3.54	XP_021332211.1(uncharacterized protein LOC101886116 [Danio rerio])	gi|130407|sp|P10394.1|POL4_DROME(RecName: Full=Retrovirus-related Pol polyprotein from transposon 412; Includes: RecName: Full=Protease; Includes: RecName: Full=Reverse transcriptase; Includes: RecName: Full=Endonuclease)
TRINITY_DN20678_c1_g1	-4.40916	2.17e-44	1.29e-42	yes	down	111.88	5.39	None	None
TRINITY_DN24093_c0_g3	-8.95587	2.83e-44	1.67e-42	yes	down	126.62	0	None	None
TRINITY_DN25363_c2_g1	5.34125	3.53e-44	2.08e-42	yes	up	2.53	107.16	None	None
TRINITY_DN37144_c0_g2	-3.53067	4.27e-44	2.51e-42	yes	down	8.11	0.61	None	None
TRINITY_DN18737_c1_g1	-2.45279	4.61e-44	2.7e-42	yes	down	282.77	48.91	XP_016306211.1(PREDICTED: uncharacterized protein LOC107661227 [Sinocyclocheilus anshuiensis])	None
TRINITY_DN30973_c0_g1	-6.04133	4.95e-44	2.89e-42	yes	down	4.5	0.04	XP_023813474.1(uncharacterized protein LOC105354612 [Oryzias latipes])	gi|82075465|sp|Q5F4A1.1|G2E3_CHICK(RecName: Full=G2/M phase-specific E3 ubiquitin-protein ligase)
TRINITY_DN25478_c2_g2	-7.76298	5.17e-44	3.01e-42	yes	down	25.27	0.12	None	None
TRINITY_DN38905_c2_g3	3.00579	1.29e-43	7.44e-42	yes	up	0.48	6.17	XP_016312282.1(PREDICTED: creatine kinase S-type, mitochondrial-like isoform X2 [Sinocyclocheilus anshuiensis])	gi|109892474|sp|Q3ZBP1.1|KCRS_BOVIN(RecName: Full=Creatine kinase S-type, mitochondrial; AltName: Full=Basic-type mitochondrial creatine kinase; Short=Mib-CK; AltName: Full=Sarcomeric mitochondrial creatine kinase; Short=S-MtCK; Flags: Precursor)
TRINITY_DN48612_c1_g1	2.58058	1.34e-43	7.74e-42	yes	up	0.51	2.86	XP_024656999.1(uncharacterized protein LOC112432775 [Maylandia zebra])	gi|130590|sp|P03555.1|POL_CAMVC(RecName: Full=Enzymatic polyprotein; Includes: RecName: Full=Aspartic protease; Includes: RecName: Full=Endonuclease; Includes: RecName: Full=Reverse transcriptase [Cauliflower mosaic virus (STRAIN CM-1841)])
TRINITY_DN48654_c3_g2	-1.95224	1.69e-43	9.75e-42	yes	down	2.3	0.62	XP_023815816.1(uncharacterized protein LOC111948209, partial [Oryzias latipes])	gi|130407|sp|P10394.1|POL4_DROME(RecName: Full=Retrovirus-related Pol polyprotein from transposon 412; Includes: RecName: Full=Protease; Includes: RecName: Full=Reverse transcriptase; Includes: RecName: Full=Endonuclease)
TRINITY_DN35248_c2_g2	-3.97184	2.23e-43	1.28e-41	yes	down	12.3	5	None	None
TRINITY_DN41445_c2_g1	-2.72018	2.51e-43	1.44e-41	yes	down	1.53	0.24	XP_023183949.1(SH3 domain-binding glutamic acid-rich-like protein isoform X1 [Xiphophorus maculatus])	gi|130407|sp|P10394.1|POL4_DROME(RecName: Full=Retrovirus-related Pol polyprotein from transposon 412; Includes: RecName: Full=Protease; Includes: RecName: Full=Reverse transcriptase; Includes: RecName: Full=Endonuclease)
TRINITY_DN41461_c0_g1	2.03407	2.6e-43	1.49e-41	yes	up	3.6	15.44	None	None
TRINITY_DN44595_c2_g1	-5.59916	2.7e-43	1.54e-41	yes	down	18.25	2.46	None	None
TRINITY_DN48531_c0_g2	-8.89529	7.89e-43	4.5e-41	yes	down	6.08	0	XP_016404739.1(PREDICTED: uncharacterized protein LOC107737659, partial [Sinocyclocheilus rhinocerous])	None
TRINITY_DN21337_c2_g1	6.29708	8.13e-43	4.62e-41	yes	up	0.01	1.22	KKF10076.1(LINE-1 reverse transcriptase [Larimichthys crocea])	gi|74705367|sp|O00370.1|LORF2_HUMAN(RecName: Full=LINE-1 retrotransposable element ORF2 protein; Short=ORF2p; Includes: RecName: Full=Reverse transcriptase; Includes: RecName: Full=Endonuclease)
TRINITY_DN33200_c0_g2	-1.45322	1.44e-42	8.16e-41	yes	down	122.87	75.64	KTF78765.1(hypothetical protein cypCar_00022541 [Cyprinus carpio])	gi|11131665|sp|O97703.1|CD81_CHLAE(RecName: Full=CD81 antigen; AltName: CD_antigen=CD81)
TRINITY_DN37750_c0_g2	8.51937	2.42e-42	1.36e-40	yes	up	0	13.09	XP_020468164.1(uncharacterized protein LOC109967148 [Monopterus albus])	None
TRINITY_DN21617_c0_g2	3.88121	2.86e-42	1.61e-40	yes	up	2.62	23.75	XP_005159209.1(uncharacterized protein si:dkey-242h9.3 isoform X1 [Danio rerio])	None
TRINITY_DN25542_c0_g1	2.84418	2.95e-42	1.65e-40	yes	up	7.2	44.08	None	None
TRINITY_DN37793_c1_g2	1.02343	3.97e-42	2.22e-40	yes	up	7.76	18.15	XP_016429005.1(PREDICTED: inactive dipeptidyl peptidase 10-like isoform X3 [Sinocyclocheilus rhinocerous])	gi|296434483|sp|Q8N608.2|DPP10_HUMAN(RecName: Full=Inactive dipeptidyl peptidase 10; AltName: Full=Dipeptidyl peptidase IV-related protein 3; Short=DPRP-3; AltName: Full=Dipeptidyl peptidase X; Short=DPP X; AltName: Full=Dipeptidyl peptidase-like protein 2; Short=DPL2)
TRINITY_DN23975_c2_g1	-4.99582	5.33e-42	2.97e-40	yes	down	3.75	0.12	XP_019215927.1(PREDICTED: uncharacterized protein LOC109202597 [Oreochromis niloticus])	None
TRINITY_DN36593_c1_g1	-3.52804	5.55e-42	3.08e-40	yes	down	26.17	3.94	None	None
TRINITY_DN25342_c0_g1	7.34241	7.45e-42	4.12e-40	yes	up	0.18	39.15	None	None
TRINITY_DN48561_c4_g1	-2.04622	7.78e-42	4.29e-40	yes	down	1.9	0.48	XP_021326499.1(uncharacterized protein LOC103910011 [Danio rerio])	None
TRINITY_DN22583_c0_g1	-8.84996	8.88e-42	4.89e-40	yes	down	5.55	0	XP_017287363.1(PREDICTED: uncharacterized protein LOC108245180 [Kryptolebias marmoratus])	gi|147668009|sp|Q8N6K7.2|SAMD3_HUMAN(RecName: Full=Sterile alpha motif domain-containing protein 3; Short=SAM domain-containing protein 3)
TRINITY_DN49013_c2_g4	2.62492	1.01e-41	5.53e-40	yes	up	6.37	41.11	None	None
TRINITY_DN30926_c1_g3	-5.5433	1.09e-41	5.95e-40	yes	down	3	0.2	XP_020477578.1(uncharacterized protein LOC109972788 [Monopterus albus])	gi|41018380|sp|O96006.1|ZBED1_HUMAN(RecName: Full=Zinc finger BED domain-containing protein 1; AltName: Full=Putative Ac-like transposable element; AltName: Full=dREF homolog)
TRINITY_DN34533_c0_g1	-2.31584	1.31e-41	7.13e-40	yes	down	4.84	1.02	XP_016104551.1(PREDICTED: uncharacterized protein LOC107564068 [Sinocyclocheilus grahami])	None
TRINITY_DN40519_c1_g1	-1.88034	1.86e-41	1.01e-39	yes	down	7.91	2.1	KTG45481.1(hypothetical protein cypCar_00016109 [Cyprinus carpio])	None
TRINITY_DN29030_c0_g1	-1.6173	1.99e-41	1.08e-39	yes	down	60.82	15.14	XP_019212043.1(PREDICTED: uncharacterized protein LOC109200918 [Oreochromis niloticus])	None
TRINITY_DN28340_c1_g3	4.34125	2.18e-41	1.18e-39	yes	up	0.29	12.1	XP_017341010.1(PREDICTED: troponin T, fast skeletal muscle isoforms-like isoform X8 [Ictalurus punctatus])	gi|1717773|sp|P06398.4|TNNT3_COTJA(RecName: Full=Troponin T, fast skeletal muscle isoforms)
TRINITY_DN28291_c0_g3	3.6785	2.47e-41	1.34e-39	yes	up	0.84	25.78	XP_018973230.1(PREDICTED: proteoglycan 4-like [Cyprinus carpio])	None
TRINITY_DN39674_c0_g1	2.13231	3.2e-41	1.73e-39	yes	up	9.76	36.77	XP_018918466.1(PREDICTED: uncharacterized protein LOC109045035 [Cyprinus carpio])	None
TRINITY_DN27809_c0_g1	2.59025	3.6e-41	1.94e-39	yes	up	0.73	5.23	None	None
TRINITY_DN43785_c1_g1	3.23117	5.54e-41	2.97e-39	yes	up	0.59	5.83	XP_022530756.1(uncharacterized protein LOC111193617 [Astyanax mexicanus])	None
TRINITY_DN25833_c0_g1	-4.18467	7.76e-41	4.14e-39	yes	down	26.4	1.5	None	None
TRINITY_DN35236_c0_g2	-4.17579	1.5e-40	7.95e-39	yes	down	2.08	0.12	XP_023207243.1(uncharacterized protein LOC102229526 isoform X1 [Xiphophorus maculatus])	gi|130407|sp|P10394.1|POL4_DROME(RecName: Full=Retrovirus-related Pol polyprotein from transposon 412; Includes: RecName: Full=Protease; Includes: RecName: Full=Reverse transcriptase; Includes: RecName: Full=Endonuclease)
TRINITY_DN22318_c0_g1	-2.65446	1.89e-40	9.99e-39	yes	down	37.03	25.67	None	None
TRINITY_DN25730_c0_g4	-2.65446	1.89e-40	9.99e-39	yes	down	128.34	21.07	BAE46429.1(ORF2-encoded protein, partial [Danio rerio])	None
TRINITY_DN41079_c0_g1	-4.06797	1.9e-40	1e-38	yes	down	9.42	0.46	XP_018965888.1(PREDICTED: uncharacterized protein LOC109096714 isoform X1 [Cyprinus carpio])	None
TRINITY_DN32898_c0_g1	-3.80634	1.99e-40	1.04e-38	yes	down	1.8	0.14	XP_019115765.1(PREDICTED: RNA-directed DNA polymerase from mobile element jockey-like [Larimichthys crocea])	gi|74825508|sp|Q9NBX4.1|RTXE_DROME(RecName: Full=Probable RNA-directed DNA polymerase from transposon X-element; AltName: Full=Reverse transcriptase)
TRINITY_DN30244_c0_g1	-4.28633	2.29e-40	1.2e-38	yes	down	9.22	0.19	XP_010773940.1(PREDICTED: uncharacterized protein LOC104949296 isoform X6 [Notothenia coriiceps])	None
TRINITY_DN43317_c1_g5	3.43734	2.36e-40	1.23e-38	yes	up	2.33	26.46	None	None
TRINITY_DN36682_c1_g2	-2.30059	2.54e-40	1.33e-38	yes	down	54.68	11.53	None	None
TRINITY_DN27820_c0_g1	-8.77919	3.48e-40	1.81e-38	yes	down	1.44	0	XP_019201006.1(PREDICTED: G2/M phase-specific E3 ubiquitin-protein ligase isoform X1 [Oreochromis niloticus])	gi|74738611|sp|Q7L622.1|G2E3_HUMAN(RecName: Full=G2/M phase-specific E3 ubiquitin-protein ligase)
TRINITY_DN48300_c5_g1	8.42477	3.64e-40	1.89e-38	yes	up	0	103.97	None	None
TRINITY_DN45792_c2_g3	-2.9008	4.77e-40	2.48e-38	yes	down	8.65	1.49	None	None
TRINITY_DN34684_c0_g1	2.35733	6.02e-40	3.11e-38	yes	up	1.22	6.58	XP_024153664.1(uncharacterized protein LOC112162181 isoform X1 [Oryzias melastigma])	None
TRINITY_DN43724_c0_g2	3.63685	6.91e-40	3.56e-38	yes	up	3.43	46.25	None	None
TRINITY_DN35102_c1_g1	-8.76298	7.9e-40	4.07e-38	yes	down	1.63	0	XP_023665577.1(uncharacterized protein K02A2.6-like [Paramormyrops kingsleyae])	gi|134034966|sp|Q99315.3|YG31B_YEAST(RecName: Full=Transposon Ty3-G Gag-Pol polyprotein; AltName: Full=Gag3-Pol3; AltName: Full=Transposon Ty3-1 TYA-TYB polyprotein; Contains: RecName: Full=Capsid protein; Short=CA; AltName: Full=p24; Contains: RecName: Full=Spacer peptide p3; Contains: RecName: Full=Nucleocapsid protein p11; Short=NC; Contains: RecName: Full=Ty3 protease; Short=PR; AltName: Full…
TRINITY_DN44846_c3_g1	-1.23726	8.08e-40	4.15e-38	yes	down	63.06	28.02	None	None
TRINITY_DN26355_c0_g1	-2.44366	9.73e-40	4.97e-38	yes	down	33.25	7.18	XP_018924331.1(PREDICTED: uncharacterized protein LOC109051228, partial [Cyprinus carpio])	None
TRINITY_DN26389_c1_g1	-1.85248	1.32e-39	6.71e-38	yes	down	20.38	8.78	XP_016314149.1(PREDICTED: gamma-aminobutyric acid receptor subunit gamma-1-like [Sinocyclocheilus anshuiensis])	gi|120782|sp|P23574.1|GBRG1_RAT(RecName: Full=Gamma-aminobutyric acid receptor subunit gamma-1; AltName: Full=GABA(A) receptor subunit gamma-1; Flags: Precursor)
TRINITY_DN47727_c1_g3	-3.26508	1.69e-39	8.61e-38	yes	down	3.55	2.65	XP_016367808.1(PREDICTED: synaptonemal complex protein 1-like [Sinocyclocheilus rhinocerous])	gi|341942095|sp|Q62209.2|SYCP1_MOUSE(RecName: Full=Synaptonemal complex protein 1; Short=SCP-1)
TRINITY_DN23248_c3_g1	8.39112	2.04e-39	1.03e-37	yes	up	0	22.91	None	None
TRINITY_DN23294_c0_g2	-5.87028	2.26e-39	1.14e-37	yes	down	38.39	1.88	None	None
TRINITY_DN41916_c0_g2	-4.03234	2.64e-39	1.33e-37	yes	down	2.53	0.16	XP_020482627.1(uncharacterized protein LOC109977106 isoform X1 [Labrus bergylta])	gi|130645|sp|P11227.1|POL_MLVRD(RecName: Full=Pol polyprotein; Contains: RecName: Full=Protease; Contains: RecName: Full=Reverse transcriptase/ribonuclease H; Short=RT; Contains: RecName: Full=Integrase; Short=IN)
TRINITY_DN39388_c0_g3	2.21268	2.69e-39	1.36e-37	yes	up	0.51	2.46	XP_017212910.1(uncharacterized protein LOC103911478 [Danio rerio])	gi|74705367|sp|O00370.1|LORF2_HUMAN(RecName: Full=LINE-1 retrotransposable element ORF2 protein; Short=ORF2p; Includes: RecName: Full=Reverse transcriptase; Includes: RecName: Full=Endonuclease)
TRINITY_DN29932_c2_g1	3.28959	2.71e-39	1.37e-37	yes	up	0.71	7.3	XP_016322957.1(PREDICTED: myosin light chain 1, skeletal muscle isoform-like [Sinocyclocheilus anshuiensis])	gi|7994632|sp|P82159.1|MLE1_LIZRA(RecName: Full=Myosin light chain 1, skeletal muscle isoform; AltName: Full=LC-1; Short=LC1; AltName: Full=Myosin light chain alkali 1; Short=Myosin light chain A1)
TRINITY_DN41464_c1_g1	-2.9678	2.92e-39	1.47e-37	yes	down	9.27	0.81	None	None
TRINITY_DN35845_c0_g4	1.44005	2.99e-39	1.5e-37	yes	up	4.53	12.89	XP_018969521.1(PREDICTED: calpain-2 catalytic subunit-like [Cyprinus carpio])	gi|13959678|sp|O08529.4|CAN2_MOUSE(RecName: Full=Calpain-2 catalytic subunit; AltName: Full=80 kDa M-calpain subunit; Short=CALP80; AltName: Full=Calcium-activated neutral proteinase 2; Short=CANP 2; AltName: Full=Calpain M-type; AltName: Full=Calpain-2 large subunit; AltName: Full=Millimolar-calpain; Short=M-calpain; Flags: Precursor)
TRINITY_DN27248_c0_g1	-1.77227	4.06e-39	2.04e-37	yes	down	158.34	58.49	CBN80807.1(Uncharacterized protein [Dicentrarchus labrax])	None
TRINITY_DN48057_c1_g1	1.07582	4.88e-39	2.44e-37	yes	up	15.37	44.9	XP_016321844.1(PREDICTED: solute carrier family 2, facilitated glucose transporter member 1-like isoform X1 [Sinocyclocheilus anshuiensis])	gi|121759|sp|P28568.1|GTR3_CHICK(RecName: Full=Solute carrier family 2, facilitated glucose transporter member 3; AltName: Full=CEF-GT3; AltName: Full=Glucose transporter type 3; Short=GLUT-3)
TRINITY_DN45097_c2_g2	1.44198	5.09e-39	2.54e-37	yes	up	42.77	98.24	None	None
TRINITY_DN35662_c0_g5	1.21792	5.28e-39	2.63e-37	yes	up	24.06	58.52	XP_016142379.1(PREDICTED: protein phosphatase 1 regulatory subunit 14A-like [Sinocyclocheilus grahami])	gi|55583760|sp|O18734.1|PP14A_PIG(RecName: Full=Protein phosphatase 1 regulatory subunit 14A; AltName: Full=17 kDa PKC-potentiated inhibitory protein of PP1; AltName: Full=Protein kinase C-potentiated inhibitor protein of 17 kDa; Short=CPI-17)
TRINITY_DN40748_c2_g1	-3.6173	7.9e-39	3.93e-37	yes	down	7.41	0.55	CDQ72985.1(unnamed protein product [Oncorhynchus mykiss])	gi|134083|sp|P21328.1|RTJK_DROME(RecName: Full=RNA-directed DNA polymerase from mobile element jockey; AltName: Full=Reverse transcriptase)
TRINITY_DN26155_c0_g2	3.33035	1.01e-38	5e-37	yes	up	0.62	5.65	None	None
TRINITY_DN45108_c1_g1	-2.03234	1.02e-38	5.05e-37	yes	down	3.04	0.93	XP_019203002.1(PREDICTED: uncharacterized protein LOC109195424 [Oreochromis niloticus])	gi|130407|sp|P10394.1|POL4_DROME(RecName: Full=Retrovirus-related Pol polyprotein from transposon 412; Includes: RecName: Full=Protease; Includes: RecName: Full=Reverse transcriptase; Includes: RecName: Full=Endonuclease)
TRINITY_DN42847_c1_g1	-2.98257	1.06e-38	5.26e-37	yes	down	46.48	6	None	None
TRINITY_DN39074_c0_g2	1.06657	1.15e-38	5.66e-37	yes	up	13.7	30.09	NP_001007397.2(lysophospholipid acyltransferase 1 [Danio rerio])	gi|74749574|sp|Q6ZNC8.1|MBOA1_HUMAN(RecName: Full=Lysophospholipid acyltransferase 1; Short=LPLAT 1; AltName: Full=1-acylglycerophosphoserine O-acyltransferase; AltName: Full=Lysophosphatidylserine acyltransferase; Short=LPSAT; Short=Lyso-PS acyltransferase; AltName: Full=Membrane-bound O-acyltransferase domain-containing protein 1; Short=O-acyltransferase domain-containing protein 1)
TRINITY_DN25824_c1_g1	1.90354	1.18e-38	5.83e-37	yes	up	10.81	30.26	XP_016422019.1(PREDICTED: uncharacterized protein LOC107750954 [Sinocyclocheilus rhinocerous])	None
TRINITY_DN31144_c3_g2	3.26984	1.37e-38	6.71e-37	yes	up	1.21	12.48	None	None
TRINITY_DN48736_c8_g2	-3.09719	1.42e-38	6.93e-37	yes	down	18.68	1.68	None	None
TRINITY_DN20007_c1_g1	-1.25087	1.76e-38	8.6e-37	yes	down	255.94	181.41	BAE46429.1(ORF2-encoded protein, partial [Danio rerio])	None
TRINITY_DN34129_c2_g1	-1.96359	2.41e-38	1.17e-36	yes	down	18.09	10.37	XP_017287363.1(PREDICTED: uncharacterized protein LOC108245180 [Kryptolebias marmoratus])	None
TRINITY_DN11129_c0_g1	8.33536	3.31e-38	1.6e-36	yes	up	0	101.68	None	None
TRINITY_DN47766_c3_g2	-2.85259	3.6e-38	1.74e-36	yes	down	187.49	26.52	None	None
TRINITY_DN32143_c1_g2	-3.99582	3.66e-38	1.76e-36	yes	down	8.68	1.76	XP_022541793.1(uncharacterized protein LOC111196701 [Astyanax mexicanus])	None
TRINITY_DN35251_c1_g2	-2.59836	4.08e-38	1.96e-36	yes	down	35.95	5.99	XP_019909143.1(PREDICTED: mediator of RNA polymerase II transcription subunit 15 isoform X5 [Esox lucius])	gi|82188674|sp|Q7ZVN7.1|MED15_DANRE(RecName: Full=Mediator of RNA polymerase II transcription subunit 15; AltName: Full=Mediator complex subunit 15)
TRINITY_DN47181_c2_g1	2.96837	4.28e-38	2.06e-36	yes	up	3.7	24.48	None	None
TRINITY_DN20544_c0_g1	1.70743	4.35e-38	2.08e-36	yes	up	10.64	47.45	XP_024135112.1(protein NYNRIN-like isoform X2 [Oryzias melastigma])	gi|338819284|sp|O92815.2|POL_WDSV(RecName: Full=Gag-Pol polyprotein; Contains: RecName: Full=Matrix protein p10; Short=MA; Contains: RecName: Full=p20; Contains: RecName: Full=Capsid protein p25; Short=CA; Contains: RecName: Full=Nucleocapsid protein p14; Short=NC-pol; Contains: RecName: Full=Protease p15; Short=PR; Contains: RecName: Full=Reverse transcriptase/ribonuclease H p90; Short=RT; Conta…
TRINITY_DN47332_c2_g1	8.32668	5.08e-38	2.42e-36	yes	up	0	428.96	YP_913609.1(NADH dehydrogenase subunit 4L [Acantopsis choirorhynchos])	gi|54037930|sp|P67783.1|NU4LM_CARAU(RecName: Full=NADH-ubiquinone oxidoreductase chain 4L; AltName: Full=NADH dehydrogenase subunit 4L (mitochondrion) [Carassius auratus] >gi|54037931|sp|P67784.1|NU4LM_CYPCA RecName: Full=NADH-ubiquinone oxidoreductase chain 4L; AltName: Full=NADH dehydrogenase subunit 4L (mitochondrion) [Cyprinus carpio])
TRINITY_DN38385_c0_g4	-4.33266	7.8e-38	3.7e-36	yes	down	3.79	0.77	XP_021332211.1(uncharacterized protein LOC101886116 [Danio rerio])	gi|130407|sp|P10394.1|POL4_DROME(RecName: Full=Retrovirus-related Pol polyprotein from transposon 412; Includes: RecName: Full=Protease; Includes: RecName: Full=Reverse transcriptase; Includes: RecName: Full=Endonuclease)
TRINITY_DN25047_c0_g1	-5.09166	9.13e-38	4.32e-36	yes	down	33.72	1.03	None	None
TRINITY_DN32449_c1_g1	1.09852	1.08e-37	5.1e-36	yes	up	18.51	35.9	XP_016143961.1(PREDICTED: ES1 protein homolog, mitochondrial-like [Sinocyclocheilus grahami])	gi|52782768|sp|Q9D172.1|ES1_MOUSE(RecName: Full=ES1 protein homolog, mitochondrial; Flags: Precursor)
TRINITY_DN25724_c0_g1	2.79209	1.09e-37	5.13e-36	yes	up	6.63	40.94	None	None
TRINITY_DN38761_c2_g2	-3.88643	1.12e-37	5.25e-36	yes	down	155.45	10.68	None	None
TRINITY_DN47920_c1_g1	-1.36823	1.13e-37	5.32e-36	yes	down	7.93	2.32	XP_019200903.1(PREDICTED: uncharacterized protein LOC102082235 isoform X1 [Oreochromis niloticus])	gi|13124684|sp|P04146.3|COPIA_DROME(RecName: Full=Copia protein; AltName: Full=Gag-int-pol protein; Contains: RecName: Full=Copia VLP protein; Contains: RecName: Full=Copia protease)
TRINITY_DN31004_c0_g1	-4.19262	1.63e-37	7.64e-36	yes	down	9.17	0.48	XP_018928925.1(PREDICTED: early nodulin-like protein 2 [Cyprinus carpio])	None
TRINITY_DN29864_c0_g4	2.30105	1.93e-37	9.04e-36	yes	up	36.46	184.58	XP_019737454.1(PREDICTED: sphingosine-1-phosphate lyase 1 [Hippocampus comes])	None
TRINITY_DN33734_c0_g2	-6.39341	2.05e-37	9.59e-36	yes	down	2.81	0.72	DAA01994.1(TPA_exp: polyprotein [Danio rerio])	gi|110282985|sp|P23074.3|POL_SFV1(RecName: Full=Pro-Pol polyprotein; AltName: Full=Pr125Pol; Contains: RecName: Full=Protease/Reverse transcriptase/ribonuclease H; AltName: Full=p87Pro-RT-RNaseH; Contains: RecName: Full=Protease/Reverse transcriptase; AltName: Full=p65Pro-RT; Contains: RecName: Full=Ribonuclease H; Short=RNase H; Contains: RecName: Full=Integrase; Short=IN; AltName: Full=p42In)
TRINITY_DN34998_c0_g1	1.3406	2.53e-37	1.18e-35	yes	up	3.6	9.56	KTF89479.1(hypothetical protein cypCar_00045891 [Cyprinus carpio])	gi|62901413|sp|Q5NVM3.1|THA10_PONAB(RecName: Full=THAP domain-containing protein 10)
TRINITY_DN38702_c2_g3	-1.74898	2.63e-37	1.22e-35	yes	down	106.39	20.47	None	None
TRINITY_DN22794_c0_g1	4.40343	3.62e-37	1.68e-35	yes	up	0.74	22.07	XP_016405055.1(PREDICTED: myosin heavy chain, fast skeletal muscle [Sinocyclocheilus rhinocerous])	gi|13431711|sp|Q90339.2|MYSS_CYPCA(RecName: Full=Myosin heavy chain, fast skeletal muscle)
TRINITY_DN46018_c1_g2	1.05017	3.91e-37	1.8e-35	yes	up	40.87	46.57	XP_016151375.1(PREDICTED: xenotropic and polytropic retrovirus receptor 1 homolog isoform X1 [Sinocyclocheilus grahami])	gi|166227729|sp|A8DZH4.1|XPR1_DANRE(RecName: Full=Xenotropic and polytropic retrovirus receptor 1 homolog)
TRINITY_DN29736_c2_g1	-1.28529	5.72e-37	2.64e-35	yes	down	18.32	7.7	XP_022542759.1(zinc finger protein 410-like isoform X1 [Astyanax mexicanus])	gi|37538030|sp|Q8BKX7.2|ZN410_MOUSE(RecName: Full=Zinc finger protein 410; AltName: Full=Another partner for ARF 1; AltName: Full=Zinc finger protein APA-1)
TRINITY_DN29766_c1_g3	-2.33185	5.95e-37	2.74e-35	yes	down	54.28	6.79	None	None
TRINITY_DN21199_c0_g1	-2.7455	5.97e-37	2.74e-35	yes	down	27.31	8.6	None	None
TRINITY_DN41997_c3_g1	-1.72739	6.93e-37	3.17e-35	yes	down	95.11	59.83	XP_018947458.1(PREDICTED: fasciculation and elongation protein zeta-2-like isoform X2 [Cyprinus carpio])	gi|76364192|sp|Q6TYB5.1|FEZ2_MOUSE(RecName: Full=Fasciculation and elongation protein zeta-2; AltName: Full=Zygin II; AltName: Full=Zygin-2)
TRINITY_DN37575_c1_g1	-8.6173	9.29e-37	4.24e-35	yes	down	1.27	0	XP_017214605.1(uncharacterized protein LOC108192163 [Danio rerio])	gi|141475|sp|P14381.1|YTX2_XENLA(RecName: Full=Transposon TX1 uncharacterized 149 kDa protein; AltName: Full=ORF 2)
TRINITY_DN24958_c0_g1	2.61974	1.6e-36	7.27e-35	yes	up	4.48	31.23	None	None
TRINITY_DN39155_c1_g2	-5.75481	1.74e-36	7.88e-35	yes	down	4.35	0.09	XP_015829750.1(PREDICTED: uncharacterized protein LOC107395006 [Nothobranchius furzeri])	None
TRINITY_DN43786_c4_g1	3.91408	1.76e-36	7.96e-35	yes	up	0.21	5.16	XP_016114515.1(PREDICTED: probable polypeptide N-acetylgalactosaminyltransferase 8 [Sinocyclocheilus grahami])	gi|116242498|sp|Q6P9A2.2|GLT18_HUMAN(RecName: Full=Polypeptide N-acetylgalactosaminyltransferase 18; AltName: Full=Polypeptide GalNAc transferase 18; Short=GalNAc-T18; AltName: Full=Polypeptide GalNAc transferase-like protein 4; Short=GalNAc-T-like protein 4; Short=pp-GaNTase-like protein 4; AltName: Full=Polypeptide N-acetylgalactosaminyltransferase-like protein 4; AltName: Full=Protein-UDP acet…
TRINITY_DN38993_c1_g1	-4.15336	2.26e-36	1.02e-34	yes	down	28.73	2.14	None	None
TRINITY_DN40448_c0_g1	3.20489	2.37e-36	1.07e-34	yes	up	4.72	24.79	KTF82306.1(hypothetical protein cypCar_00028221 [Cyprinus carpio])	None
TRINITY_DN37606_c0_g3	1.78528	2.66e-36	1.2e-34	yes	up	0.77	2.93	XP_014267405.2(uncharacterized protein LOC106676062 [Maylandia zebra])	gi|130398|sp|P20825.1|POL2_DROME(RecName: Full=Retrovirus-related Pol polyprotein from transposon 297; Includes: RecName: Full=Protease; Includes: RecName: Full=Reverse transcriptase; Includes: RecName: Full=Endonuclease)
TRINITY_DN28733_c0_g1	2.2893	2.91e-36	1.31e-34	yes	up	2.72	25.91	None	None
TRINITY_DN29088_c0_g2	-5.73278	5.86e-36	2.62e-34	yes	down	1.78	0.04	XP_023810682.1(uncharacterized protein LOC111946284 isoform X1 [Oryzias latipes])	None
TRINITY_DN21265_c0_g2	5.44159	6.07e-36	2.71e-34	yes	up	0.18	8.21	NP_001038847.1(troponin I, skeletal, slow c [Danio rerio])	gi|136221|sp|P02645.1|TNNI1_RABIT(RecName: Full=Troponin I, slow skeletal muscle; AltName: Full=Troponin I, slow-twitch isoform)
TRINITY_DN30915_c1_g2	-3.91987	7.02e-36	3.13e-34	yes	down	14.12	0.96	None	None
TRINITY_DN20596_c3_g1	-2.28369	1.07e-35	4.74e-34	yes	down	19.44	17.99	XP_015822834.1(PREDICTED: uncharacterized protein LOC107390551 [Nothobranchius furzeri])	None
TRINITY_DN34658_c0_g1	1.60851	1.62e-35	7.17e-34	yes	up	2.62	8.41	XP_017570614.1(PREDICTED: LIM domain only protein 7-like isoform X8 [Pygocentrus nattereri])	gi|296439483|sp|Q9UPQ0.4|LIMC1_HUMAN(RecName: Full=LIM and calponin homology domains-containing protein 1)
TRINITY_DN25736_c3_g1	-8.55276	1.8e-35	7.95e-34	yes	down	8.88	0	None	None
TRINITY_DN34208_c2_g2	3.07386	2.28e-35	1.01e-33	yes	up	3.51	5.78	XP_018955144.1(PREDICTED: uncharacterized protein LOC109084951, partial [Cyprinus carpio])	None
TRINITY_DN46862_c1_g2	-1.02922	4.36e-35	1.92e-33	yes	down	12.2	6.27	XP_018981985.1(PREDICTED: LOW QUALITY PROTEIN: centrosomal protein of 85 kDa-like [Cyprinus carpio])	gi|74762226|sp|Q5SZL2.1|CE85L_HUMAN(RecName: Full=Centrosomal protein of 85 kDa-like; AltName: Full=Serologically defined breast cancer antigen NY-BR-15)
TRINITY_DN38936_c0_g2	-2.94519	5.79e-35	2.55e-33	yes	down	4.14	0.93	KTF72727.1(hypothetical protein cypCar_00049295 [Cyprinus carpio])	None
TRINITY_DN43947_c2_g1	-4.10273	6.05e-35	2.66e-33	yes	down	16.04	0.67	None	None
TRINITY_DN36384_c0_g2	-1.28728	9.27e-35	4.05e-33	yes	down	34.22	11.96	None	None
TRINITY_DN29013_c0_g1	2.07095	1.34e-34	5.83e-33	yes	up	0.55	2.41	XP_018964562.1(PREDICTED: uncharacterized protein LOC109095310 [Cyprinus carpio])	gi|38258172|sp|Q8I7P9.1|POL5_DROME(RecName: Full=Retrovirus-related Pol polyprotein from transposon opus; Includes: RecName: Full=Protease; Includes: RecName: Full=Reverse transcriptase; Includes: RecName: Full=Endonuclease)
TRINITY_DN49051_c4_g1	1.49024	1.42e-34	6.18e-33	yes	up	16.88	27.04	XP_018924331.1(PREDICTED: uncharacterized protein LOC109051228, partial [Cyprinus carpio])	None
TRINITY_DN39997_c0_g1	3.72901	2.86e-34	1.24e-32	yes	up	0.18	7.63	XP_016339528.1(PREDICTED: serine/threonine-protein kinase pim-2-like [Sinocyclocheilus anshuiensis])	gi|313104154|sp|Q9YHZ5.2|PIM2_DANRE(RecName: Full=Serine/threonine-protein kinase pim-2; AltName: Full=Kinase pim-1)
TRINITY_DN24551_c0_g6	2.12576	2.86e-34	1.24e-32	yes	up	1.61	7.97	AGL92230.1(MHC class I antigen UKA [Danio rerio])	gi|205372551|sp|Q8HWB0.2|HMR1_MOUSE(RecName: Full=Major histocompatibility complex class I-related gene protein; Short=MHC class I-related gene protein; AltName: Full=Class I histocompatibility antigen-like protein; Flags: Precursor)
TRINITY_DN33230_c0_g7	1.09825	4.18e-34	1.79e-32	yes	up	12.92	29	XP_016393151.1(PREDICTED: keratin, type I cytoskeletal 13-like [Sinocyclocheilus rhinocerous])	gi|82102442|sp|Q8JFQ6.1|K1C13_ONCMY(RecName: Full=Keratin, type I cytoskeletal 13; AltName: Full=Cytokeratin-13; Short=CK-13; AltName: Full=Keratin-13; Short=K13)
TRINITY_DN45583_c0_g1	-1.7472	6e-34	2.56e-32	yes	down	24.13	10.14	None	None
TRINITY_DN37144_c0_g1	-1.70477	1.06e-33	4.48e-32	yes	down	5.57	1.79	XP_019907056.1(PREDICTED: DNA transposase THAP9 isoform X1 [Esox lucius])	gi|166987614|sp|Q9H5L6.2|THAP9_HUMAN(RecName: Full=DNA transposase THAP9; AltName: Full=THAP domain-containing protein 9; Short=hTh9)
TRINITY_DN47766_c5_g1	-2.1031	1.09e-33	4.61e-32	yes	down	234.81	52.61	None	None
TRINITY_DN34963_c0_g1	2.56553	1.54e-33	6.48e-32	yes	up	1.94	13.8	XP_016364067.1(PREDICTED: uncharacterized protein LOC107705329 isoform X1 [Sinocyclocheilus rhinocerous])	None
TRINITY_DN33086_c4_g1	-2.42213	2.07e-33	8.68e-32	yes	down	34.89	7.06	None	None
TRINITY_DN32797_c0_g2	-2.43833	2.33e-33	9.78e-32	yes	down	14.68	3.55	XP_024662256.1(uncharacterized protein LOC106676713 [Maylandia zebra])	None
TRINITY_DN30436_c1_g1	-4.91596	2.46e-33	1.03e-31	yes	down	7	0.17	None	None
TRINITY_DN34515_c0_g1	-3.57831	2.5e-33	1.04e-31	yes	down	1.77	0.16	XP_018934441.1(PREDICTED: uncharacterized protein LOC109061806 [Cyprinus carpio])	gi|130407|sp|P10394.1|POL4_DROME(RecName: Full=Retrovirus-related Pol polyprotein from transposon 412; Includes: RecName: Full=Protease; Includes: RecName: Full=Reverse transcriptase; Includes: RecName: Full=Endonuclease)
TRINITY_DN48767_c6_g2	-2.92648	2.56e-33	1.07e-31	yes	down	14.51	2.53	None	None
TRINITY_DN38579_c1_g4	-4.6762	2.61e-33	1.09e-31	yes	down	4.25	0.2	KKF18607.1(hypothetical protein EH28_05735 [Larimichthys crocea])	None
TRINITY_DN41174_c0_g2	2.35517	3.01e-33	1.25e-31	yes	up	0.8	3.13	XP_023698428.1(uncharacterized protein LOC111859709 [Paramormyrops kingsleyae])	gi|130407|sp|P10394.1|POL4_DROME(RecName: Full=Retrovirus-related Pol polyprotein from transposon 412; Includes: RecName: Full=Protease; Includes: RecName: Full=Reverse transcriptase; Includes: RecName: Full=Endonuclease)
TRINITY_DN34455_c0_g1	-5.60959	3.94e-33	1.63e-31	yes	down	12.09	1.84	None	None
TRINITY_DN48146_c2_g1	-3.31573	4.16e-33	1.72e-31	yes	down	31.64	2.38	XP_020786318.1(uncharacterized protein LOC110165464 [Boleophthalmus pectinirostris])	None
TRINITY_DN26215_c0_g1	-4.66461	5e-33	2.07e-31	yes	down	1.23	0.05	XP_018974294.1(PREDICTED: uncharacterized protein LOC109105445 [Cyprinus carpio])	None
TRINITY_DN17400_c0_g2	-4.02873	6.06e-33	2.49e-31	yes	down	39.06	2.5	None	None
TRINITY_DN38417_c1_g2	-1.99841	6.85e-33	2.81e-31	yes	down	148.53	37.98	None	None
TRINITY_DN22348_c1_g2	-2.97376	6.85e-33	2.81e-31	yes	down	56.89	8.16	None	None
TRINITY_DN29035_c2_g1	-8.41432	7.43e-33	3.04e-31	yes	down	10.18	0	XP_023850564.1(transcription factor Adf-1 [Salvelinus alpinus])	None
TRINITY_DN30782_c0_g1	4.39579	8.36e-33	3.41e-31	yes	up	0.14	3.52	XP_017159158.1(PREDICTED: uncharacterized protein LOC108166111, partial [Poecilia reticulata])	gi|23822388|sp|Q91VN1.1|ZNF24_MOUSE(RecName: Full=Zinc finger protein 24; AltName: Full=Hypomyelinated CNS protein; AltName: Full=Zinc finger protein 191; AltName: Full=Zinc finger protein ZF-12)
TRINITY_DN39344_c1_g4	-6.184	8.96e-33	3.65e-31	yes	down	38.13	1.17	None	None
TRINITY_DN40930_c3_g1	1.68686	9.47e-33	3.85e-31	yes	up	17	36.85	XP_016107777.1(PREDICTED: uncharacterized protein LOC107566763, partial [Sinocyclocheilus grahami])	gi|338819284|sp|O92815.2|POL_WDSV(RecName: Full=Gag-Pol polyprotein; Contains: RecName: Full=Matrix protein p10; Short=MA; Contains: RecName: Full=p20; Contains: RecName: Full=Capsid protein p25; Short=CA; Contains: RecName: Full=Nucleocapsid protein p14; Short=NC-pol; Contains: RecName: Full=Protease p15; Short=PR; Contains: RecName: Full=Reverse transcriptase/ribonuclease H p90; Short=RT; Conta…
TRINITY_DN42752_c2_g1	-3.4852	1.09e-32	4.43e-31	yes	down	16.2	1.45	None	None
TRINITY_DN30863_c0_g2	4.621	1.14e-32	4.61e-31	yes	up	1.88	27.2	XP_019732495.1(PREDICTED: myosin heavy chain, fast skeletal muscle-like [Hippocampus comes])	gi|13431711|sp|Q90339.2|MYSS_CYPCA(RecName: Full=Myosin heavy chain, fast skeletal muscle)
TRINITY_DN33460_c0_g1	-3.10273	1.27e-32	5.13e-31	yes	down	8.42	9.07	None	None
TRINITY_DN30670_c0_g3	4.03536	1.51e-32	6.11e-31	yes	up	0.47	8.77	None	None
TRINITY_DN25330_c1_g1	-2.41515	1.72e-32	6.92e-31	yes	down	21.48	9.53	None	None
TRINITY_DN35894_c0_g3	2.27909	1.76e-32	7.07e-31	yes	up	9.84	49.97	None	None
TRINITY_DN30873_c1_g2	-2.51145	1.95e-32	7.82e-31	yes	down	104.33	35.2	None	None
TRINITY_DN34445_c1_g2	1.52118	2.03e-32	8.15e-31	yes	up	3.78	18.68	XP_016142795.1(PREDICTED: partitioning defective 6 homolog gamma-like [Sinocyclocheilus grahami])	gi|30913213|sp|Q9JK84.1|PAR6G_MOUSE(RecName: Full=Partitioning defective 6 homolog gamma; Short=PAR-6 gamma; Short=PAR6A)
TRINITY_DN21999_c2_g1	-4.00687	2.26e-32	9.04e-31	yes	down	1.98	0.13	CDQ76752.1(unnamed protein product [Oncorhynchus mykiss])	None
TRINITY_DN39520_c2_g3	2.62432	2.33e-32	9.3e-31	yes	up	51.96	39.6	None	None
TRINITY_DN48925_c5_g1	-1.8976	2.5e-32	9.96e-31	yes	down	13.59	2.01	XP_016328244.1(PREDICTED: uncharacterized protein LOC107677738 [Sinocyclocheilus anshuiensis])	None
TRINITY_DN21670_c0_g3	-2.71571	2.53e-32	1.01e-30	yes	down	1.74	0.28	XP_014884098.1(PREDICTED: uncharacterized protein LOC106945151, partial [Poecilia latipinna])	gi|130407|sp|P10394.1|POL4_DROME(RecName: Full=Retrovirus-related Pol polyprotein from transposon 412; Includes: RecName: Full=Protease; Includes: RecName: Full=Reverse transcriptase; Includes: RecName: Full=Endonuclease)
TRINITY_DN32117_c0_g1	4.37601	2.58e-32	1.03e-30	yes	up	0.18	8.76	XP_016108688.1(PREDICTED: uncharacterized protein LOC107567500 isoform X8 [Sinocyclocheilus grahami])	gi|585390|sp|P38552.1|LEG4_RAT(RecName: Full=Galectin-4; Short=Gal-4; AltName: Full=L-36 lactose-binding protein; Short=L36LBP; AltName: Full=Lactose-binding lectin 4)
TRINITY_DN27219_c0_g3	1.59359	2.81e-32	1.11e-30	yes	up	9.11	23.94	XP_016369513.1(PREDICTED: zinc finger protein 501-like [Sinocyclocheilus rhinocerous])	None
TRINITY_DN24910_c1_g1	-1.1563	3.13e-32	1.24e-30	yes	down	77.25	49.86	None	None
TRINITY_DN28019_c0_g1	-8.37219	4.26e-32	1.68e-30	yes	down	1.14	0	XP_018964140.1(PREDICTED: uncharacterized protein LOC109094915 [Cyprinus carpio])	gi|146291076|sp|Q7LHG5.2|YI31B_YEAST(RecName: Full=Transposon Ty3-I Gag-Pol polyprotein; AltName: Full=Gag3-Pol3; AltName: Full=Transposon Ty3-2 TYA-TYB polyprotein; Contains: RecName: Full=Capsid protein; Short=CA; AltName: Full=p24; Contains: RecName: Full=Spacer peptide p3; Contains: RecName: Full=Nucleocapsid protein p11; Short=NC; Contains: RecName: Full=Ty3 protease; Short=PR; AltName: Full…
TRINITY_DN20746_c0_g1	3.87455	5.88e-32	2.31e-30	yes	up	0.88	4.03	XP_022540118.1(uncharacterized protein LOC111195870 isoform X2 [Astyanax mexicanus])	None
TRINITY_DN31986_c1_g5	8.01751	5.94e-32	2.33e-30	yes	up	0	6.22	None	None
TRINITY_DN47191_c0_g1	-7.21424	6.42e-32	2.52e-30	yes	down	0.96	0.01	XP_017214605.1(uncharacterized protein LOC108192163 [Danio rerio])	gi|126296|sp|P08548.1|LIN1_NYCCO(RecName: Full=LINE-1 reverse transcriptase homolog)
TRINITY_DN38910_c0_g3	-2.34753	6.53e-32	2.55e-30	yes	down	4.89	1.01	XP_016319399.1(PREDICTED: uncharacterized protein LOC107671068 [Sinocyclocheilus anshuiensis])	None
TRINITY_DN26616_c1_g2	2.44354	7.89e-32	3.07e-30	yes	up	0.62	5.66	XP_018944465.1(PREDICTED: protein-glutamine gamma-glutamyltransferase 5-like [Cyprinus carpio])	gi|20532415|sp|O43548.4|TGM5_HUMAN(RecName: Full=Protein-glutamine gamma-glutamyltransferase 5; AltName: Full=Transglutaminase X; Short=TG(X); Short=TGX; Short=TGase X; AltName: Full=Transglutaminase-5; Short=TGase-5)
TRINITY_DN23060_c0_g1	5.25921	9.99e-32	3.88e-30	yes	up	0.27	10.86	XP_024151897.1(actin, alpha skeletal muscle A-like [Oryzias melastigma])	gi|1351868|sp|P49055.1|ACTS_CARAU(RecName: Full=Actin, alpha skeletal muscle; AltName: Full=Alpha-actin-1; Flags: Precursor)
TRINITY_DN27003_c0_g3	-8.35066	1.02e-31	3.97e-30	yes	down	11.38	0	None	None
TRINITY_DN45589_c0_g2	-3.86937	1.06e-31	4.12e-30	yes	down	0.97	0.07	XP_018952198.1(PREDICTED: uncharacterized protein LOC109081681 [Cyprinus carpio])	gi|130407|sp|P10394.1|POL4_DROME(RecName: Full=Retrovirus-related Pol polyprotein from transposon 412; Includes: RecName: Full=Protease; Includes: RecName: Full=Reverse transcriptase; Includes: RecName: Full=Endonuclease)
TRINITY_DN24046_c0_g2	-6.11556	2.24e-31	8.62e-30	yes	down	1.97	0.03	XP_017211834.1(uncharacterized protein LOC108190122 [Danio rerio])	gi|134034966|sp|Q99315.3|YG31B_YEAST(RecName: Full=Transposon Ty3-G Gag-Pol polyprotein; AltName: Full=Gag3-Pol3; AltName: Full=Transposon Ty3-1 TYA-TYB polyprotein; Contains: RecName: Full=Capsid protein; Short=CA; AltName: Full=p24; Contains: RecName: Full=Spacer peptide p3; Contains: RecName: Full=Nucleocapsid protein p11; Short=NC; Contains: RecName: Full=Ty3 protease; Short=PR; AltName: Full…
TRINITY_DN30410_c1_g2	-8.3288	2.47e-31	9.5e-30	yes	down	1.07	0	XP_024122537.1(uncharacterized protein LOC112143031 [Oryzias melastigma])	gi|141475|sp|P14381.1|YTX2_XENLA(RecName: Full=Transposon TX1 uncharacterized 149 kDa protein; AltName: Full=ORF 2)
TRINITY_DN45031_c0_g1	-1.7857	2.53e-31	9.71e-30	yes	down	3.34	0.79	XP_019210590.1(PREDICTED: uncharacterized protein K02A2.6-like [Oreochromis niloticus])	gi|28380144|sp|Q9UR07.1|TF211_SCHPO(RecName: Full=Transposon Tf2-11 polyprotein; AltName: Full=Retrotransposable element Tf2 155 kDa protein)
TRINITY_DN45172_c2_g1	-3.10189	2.98e-31	1.14e-29	yes	down	9.05	1.71	XP_021334064.1(collagen alpha-2(I) chain-like isoform X1 [Danio rerio])	gi|85687376|sp|P20908.3|CO5A1_HUMAN(RecName: Full=Collagen alpha-1(V) chain; Flags: Precursor)
TRINITY_DN23547_c3_g1	-2.0876	3.07e-31	1.17e-29	yes	down	22.95	4.06	None	None
TRINITY_DN23752_c1_g1	-3.96213	3.14e-31	1.2e-29	yes	down	6.14	0.2	XP_019956155.1(PREDICTED: putative nuclease HARBI1 [Paralichthys olivaceus])	gi|74732341|sp|Q96MB7.1|HARB1_HUMAN(RecName: Full=Putative nuclease HARBI1; AltName: Full=Harbinger transposase-derived nuclease)
TRINITY_DN17056_c0_g1	-2.93479	3.32e-31	1.27e-29	yes	down	111.49	36.73	None	None
TRINITY_DN24480_c1_g4	-7.16574	5.13e-31	1.95e-29	yes	down	1.19	0.01	XP_019211442.1(PREDICTED: uncharacterized protein LOC106097634 [Oreochromis niloticus])	None
TRINITY_DN18827_c1_g1	7.96201	5.76e-31	2.18e-29	yes	up	0	13.38	XP_016425227.1(PREDICTED: troponin I, slow skeletal muscle-like [Sinocyclocheilus rhinocerous])	gi|62511196|sp|Q5PYI0.3|TNNI3_HORSE(RecName: Full=Troponin I, cardiac muscle; AltName: Full=Cardiac troponin I)
TRINITY_DN47332_c1_g2	7.96201	5.76e-31	2.18e-29	yes	up	0	155.09	YP_008815861.1(NADH dehydrogenase subunit 5 (mitochondrion) [Misgurnus bipartitus])	gi|6647638|sp|Q9ZZM3.1|NU5M_SALSA(RecName: Full=NADH-ubiquinone oxidoreductase chain 5; AltName: Full=NADH dehydrogenase subunit 5)
TRINITY_DN24148_c1_g1	3.97141	6.4e-31	2.41e-29	yes	up	0.19	3.2	XP_013877416.1(PREDICTED: RNA-directed DNA polymerase from mobile element jockey-like [Austrofundulus limnaeus])	gi|134083|sp|P21328.1|RTJK_DROME(RecName: Full=RNA-directed DNA polymerase from mobile element jockey; AltName: Full=Reverse transcriptase)
TRINITY_DN40477_c1_g1	1.16673	6.41e-31	2.41e-29	yes	up	6.77	15.93	XP_016302940.1(PREDICTED: coiled-coil domain-containing protein 136-like isoform X1 [Sinocyclocheilus anshuiensis])	gi|296439415|sp|Q96JN2.3|CC136_HUMAN(RecName: Full=Coiled-coil domain-containing protein 136; AltName: Full=Nasopharyngeal carcinoma-associated gene 6 protein)
TRINITY_DN49052_c2_g1	2.33007	6.92e-31	2.6e-29	yes	up	4.49	21.28	None	None
TRINITY_DN25298_c0_g1	2.12136	8.63e-31	3.24e-29	yes	up	1.15	4.31	XP_016329538.1(PREDICTED: otolith matrix protein 1-like [Sinocyclocheilus anshuiensis])	gi|123909198|sp|Q0VIL3.1|OTOMP_DANRE(RecName: Full=Otolith matrix protein 1; Short=OMP-1; Flags: Precursor)
TRINITY_DN41661_c0_g1	-1.53031	1.05e-30	3.93e-29	yes	down	4.42	1.51	XP_018923964.1(PREDICTED: contactin-associated protein 1-like [Cyprinus carpio])	gi|17433016|sp|P78357.1|CNTP1_HUMAN(RecName: Full=Contactin-associated protein 1; Short=Caspr; Short=Caspr1; AltName: Full=Neurexin IV; AltName: Full=Neurexin-4; AltName: Full=p190; Flags: Precursor)
TRINITY_DN29285_c2_g1	2.3438	1.2e-30	4.47e-29	yes	up	2.66	16.02	KTF86954.1(hypothetical protein cypCar_00043801 [Cyprinus carpio])	gi|81902105|sp|Q8VHP7.1|ILEUB_MOUSE(RecName: Full=Leukocyte elastase inhibitor B; AltName: Full=Serine protease inhibitor EIB; AltName: Full=Serpin B1b)
TRINITY_DN42937_c0_g1	5.20712	1.31e-30	4.91e-29	yes	up	0.07	2.34	KTF93037.1(hypothetical protein cypCar_00035265 [Cyprinus carpio])	gi|408360140|sp|Q80XF5.2|I22R2_MOUSE(RecName: Full=Interleukin-22 receptor subunit alpha-2; Short=IL-22 receptor subunit alpha-2; Short=IL-22R-alpha-2; Short=IL-22RA2; AltName: Full=Cytokine receptor family type 2, soluble 1; Short=CRF2-S1; AltName: Full=Interleukin-22-binding protein; Short=IL-22BP; Short=IL22BP; AltName: Full=ZcytoR16; Flags: Precursor)
TRINITY_DN45168_c0_g2	-8.28406	1.45e-30	5.42e-29	yes	down	1.78	0	XP_005167244.1(uncharacterized protein LOC101886427 [Danio rerio])	None
TRINITY_DN20229_c3_g1	-2.61641	1.58e-30	5.89e-29	yes	down	254.74	63.71	None	None
TRINITY_DN46565_c2_g1	-1.76601	1.78e-30	6.61e-29	yes	down	4.95	1.39	XP_001922931.3(circularly permutated Ras protein 1-like [Danio rerio])	gi|74876101|sp|Q75J93.1|CPAS1_DICDI(RecName: Full=Circularly permutated Ras protein 1; Short=DdiCPRas1)
TRINITY_DN42962_c0_g1	-2.77219	2.07e-30	7.64e-29	yes	down	4.54	1.03	XP_018957232.1(PREDICTED: uncharacterized protein LOC109087500 [Cyprinus carpio])	None
TRINITY_DN46488_c3_g1	1.40798	2.11e-30	7.8e-29	yes	up	2.05	5.78	XP_023649018.1(LOW QUALITY PROTEIN: uncharacterized protein LOC111834214 [Paramormyrops kingsleyae])	gi|130407|sp|P10394.1|POL4_DROME(RecName: Full=Retrovirus-related Pol polyprotein from transposon 412; Includes: RecName: Full=Protease; Includes: RecName: Full=Reverse transcriptase; Includes: RecName: Full=Endonuclease)
TRINITY_DN30039_c1_g3	-2.10601	2.53e-30	9.34e-29	yes	down	45.31	13.83	None	None
TRINITY_DN27671_c0_g1	2.74727	2.74e-30	1.01e-28	yes	up	0.62	4.36	XP_018956265.1(PREDICTED: hyaluronan and proteoglycan link protein 1-like isoform X2 [Cyprinus carpio])	gi|130310|sp|P10915.2|HPLN1_HUMAN(RecName: Full=Hyaluronan and proteoglycan link protein 1; AltName: Full=Cartilage-linking protein 1; Short=Cartilage-link protein; AltName: Full=Proteoglycan link protein; Flags: Precursor)
TRINITY_DN45923_c0_g1	-8.26116	3.54e-30	1.3e-28	yes	down	59.17	0	None	None
TRINITY_DN25612_c1_g1	-4.04025	4.31e-30	1.58e-28	yes	down	21.68	1.3	None	None
TRINITY_DN39530_c0_g1	1.8201	4.32e-30	1.58e-28	yes	up	1.31	3.83	XP_021327742.1(uncharacterized protein K02A2.6-like [Danio rerio])	gi|146291076|sp|Q7LHG5.2|YI31B_YEAST(RecName: Full=Transposon Ty3-I Gag-Pol polyprotein; AltName: Full=Gag3-Pol3; AltName: Full=Transposon Ty3-2 TYA-TYB polyprotein; Contains: RecName: Full=Capsid protein; Short=CA; AltName: Full=p24; Contains: RecName: Full=Spacer peptide p3; Contains: RecName: Full=Nucleocapsid protein p11; Short=NC; Contains: RecName: Full=Ty3 protease; Short=PR; AltName: Full…
TRINITY_DN46015_c0_g1	2.36959	4.62e-30	1.69e-28	yes	up	0.33	1.79	XP_021325913.1(uncharacterized protein LOC110438340 [Danio rerio])	gi|130405|sp|P04323.1|POL3_DROME(RecName: Full=Retrovirus-related Pol polyprotein from transposon 17.6; Includes: RecName: Full=Protease; Includes: RecName: Full=Reverse transcriptase; Includes: RecName: Full=Endonuclease)
TRINITY_DN44690_c0_g1	2.26704	4.75e-30	1.73e-28	yes	up	0.43	2.15	XP_016313554.1(PREDICTED: myb-related protein A [Sinocyclocheilus anshuiensis])	gi|1709195|sp|P52550.1|MYBA_CHICK(RecName: Full=Myb-related protein A; Short=A-Myb; AltName: Full=Myb-like protein 1)
TRINITY_DN47580_c4_g5	3.78045	4.81e-30	1.75e-28	yes	up	2.97	42.29	None	None
TRINITY_DN20305_c0_g1	3.37229	5.48e-30	1.99e-28	yes	up	1.92	19	XP_016085890.1(PREDICTED: tumor necrosis factor receptor superfamily member 14-like isoform X2 [Sinocyclocheilus grahami])	None
TRINITY_DN46911_c2_g2	-3.38284	7.1e-30	2.56e-28	yes	down	29.83	3.04	XP_005169935.1(uncharacterized protein LOC554708 isoform X2 [Danio rerio])	None
TRINITY_DN41469_c1_g1	3.79209	7.28e-30	2.62e-28	yes	up	0.38	7.28	XP_013877416.1(PREDICTED: RNA-directed DNA polymerase from mobile element jockey-like [Austrofundulus limnaeus])	gi|74821373|sp|Q95SX7.1|RTBS_DROME(RecName: Full=Probable RNA-directed DNA polymerase from transposon BS; AltName: Full=Reverse transcriptase)
TRINITY_DN33433_c0_g2	-6.03684	7.72e-30	2.78e-28	yes	down	15.8	0.05	None	None
TRINITY_DN44158_c2_g1	-1.07884	9.51e-30	3.42e-28	yes	down	53.85	18.83	None	None
TRINITY_DN42299_c2_g2	-2.017	1.01e-29	3.62e-28	yes	down	45.31	7.37	None	None
TRINITY_DN34233_c0_g1	5.72699	1.3e-29	4.63e-28	yes	up	0.06	3.43	AAH85636.1(Atp2a1 protein [Danio rerio])	gi|12643673|sp|P70083.2|AT2A1_MAKNI(RecName: Full=Sarcoplasmic/endoplasmic reticulum calcium ATPase 1; Short=SERCA1; Short=SR Ca(2+)-ATPase 1; AltName: Full=Calcium pump 1; AltName: Full=Calcium-transporting ATPase sarcoplasmic reticulum type, fast twitch skeletal muscle isoform; AltName: Full=Endoplasmic reticulum class 1/2 Ca(2+) ATPase)
TRINITY_DN41538_c0_g2	5.72699	1.3e-29	4.63e-28	yes	up	0.04	1.95	XP_018944120.1(PREDICTED: uncharacterized protein LOC109072326 [Cyprinus carpio])	gi|134083|sp|P21328.1|RTJK_DROME(RecName: Full=RNA-directed DNA polymerase from mobile element jockey; AltName: Full=Reverse transcriptase)
TRINITY_DN44746_c0_g3	-6.02112	1.54e-29	5.47e-28	yes	down	100.18	1.57	None	None
TRINITY_DN41268_c0_g2	-1.30957	1.54e-29	5.48e-28	yes	down	21.67	9.16	XP_016374470.1(PREDICTED: ubiquitin carboxyl-terminal hydrolase 4-like, partial [Sinocyclocheilus rhinocerous])	gi|158513811|sp|A6QR55.1|UBP4_BOVIN(RecName: Full=Ubiquitin carboxyl-terminal hydrolase 4; AltName: Full=Deubiquitinating enzyme 4; AltName: Full=Ubiquitin thioesterase 4; AltName: Full=Ubiquitin-specific-processing protease 4)
TRINITY_DN25888_c0_g2	-3.51039	1.9e-29	6.73e-28	yes	down	66.91	4.78	None	None
TRINITY_DN38555_c0_g1	-1.40229	2.01e-29	7.12e-28	yes	down	386.84	122.31	None	None
TRINITY_DN42657_c1_g2	-2.43693	2.36e-29	8.34e-28	yes	down	47.99	5.79	XP_010778572.1(PREDICTED: uncharacterized protein LOC104953338, partial [Notothenia coriiceps])	None
TRINITY_DN33184_c1_g2	-2.28814	2.9e-29	1.02e-27	yes	down	91.71	35.42	None	None
TRINITY_DN26232_c1_g4	-3.12715	3.04e-29	1.07e-27	yes	down	29.76	14.43	None	None
TRINITY_DN39526_c1_g3	-8.20227	3.32e-29	1.16e-27	yes	down	5.07	0	XP_016118944.1(PREDICTED: uncharacterized protein LOC107577374 [Sinocyclocheilus grahami])	None
TRINITY_DN27861_c0_g2	1.47342	3.38e-29	1.18e-27	yes	up	2.65	7.71	XP_016136193.1(PREDICTED: 5,6-dihydroxyindole-2-carboxylic acid oxidase-like [Sinocyclocheilus grahami])	gi|12644141|sp|P17643.2|TYRP1_HUMAN(RecName: Full=5,6-dihydroxyindole-2-carboxylic acid oxidase; Short=DHICA oxidase; AltName: Full=Catalase B; AltName: Full=Glycoprotein 75; AltName: Full=Melanoma antigen gp75; AltName: Full=Tyrosinase-related protein 1; Short=TRP; Short=TRP-1; Short=TRP1; Flags: Precursor)
TRINITY_DN33950_c0_g1	3.76352	3.62e-29	1.26e-27	yes	up	0.44	19.44	None	None
TRINITY_DN48451_c7_g1	-3.07439	3.8e-29	1.33e-27	yes	down	23.57	13.85	None	None
TRINITY_DN30422_c0_g2	-5.0233	4.01e-29	1.39e-27	yes	down	4.96	1.23	XP_018939718.1(PREDICTED: uncharacterized protein LOC109067173 [Cyprinus carpio])	None
TRINITY_DN30358_c1_g1	-4.72834	4.04e-29	1.4e-27	yes	down	67.89	1.54	None	None
TRINITY_DN32824_c0_g3	-3.66461	4.84e-29	1.68e-27	yes	down	3.75	0.31	XP_019953242.1(PREDICTED: uncharacterized protein LOC109636127 [Paralichthys olivaceus])	None
TRINITY_DN45099_c1_g1	2.25482	5.63e-29	1.95e-27	yes	up	1.56	8.7	None	None
TRINITY_DN33558_c0_g1	3.2656	9.04e-29	3.11e-27	yes	up	0.68	15.58	XP_021326705.1(uncharacterized protein LOC568664 isoform X10 [Danio rerio])	gi|132574|sp|P10775.1|RINI_PIG(RecName: Full=Ribonuclease inhibitor; AltName: Full=Ribonuclease/angiogenin inhibitor 1)
TRINITY_DN36679_c0_g1	-1.33065	1e-28	3.44e-27	yes	down	7.14	2.8	XP_016314723.1(PREDICTED: sodium-dependent phosphate transporter 1-A [Sinocyclocheilus anshuiensis])	gi|82185632|sp|Q6NV12.1|S20AA_DANRE(RecName: Full=Sodium-dependent phosphate transporter 1-A; AltName: Full=Solute carrier family 20 member 1-A)
TRINITY_DN40575_c0_g1	3.52132	1.01e-28	3.46e-27	yes	up	1.35	2.8	XP_018932982.1(PREDICTED: CD48 antigen-like, partial [Cyprinus carpio])	None
TRINITY_DN45745_c1_g1	1.67504	1.14e-28	3.9e-27	yes	up	2.77	10.13	XP_001331928.5(attractin-like protein 1 isoform X1 [Danio rerio])	gi|189081676|sp|Q6A051.2|ATRN1_MOUSE(RecName: Full=Attractin-like protein 1; Flags: Precursor)
TRINITY_DN29283_c1_g1	-3.85609	1.17e-28	4e-27	yes	down	11.96	3.26	None	None
TRINITY_DN43899_c0_g11	-8.16574	1.29e-28	4.4e-27	yes	down	6.37	0	XP_016420239.1(PREDICTED: uncharacterized protein LOC107749582 [Sinocyclocheilus rhinocerous])	None
TRINITY_DN36983_c0_g1	4.44282	1.48e-28	5.05e-27	yes	up	2.61	37.66	XP_022538565.1(LOW QUALITY PROTEIN: uncharacterized protein LOC103036502 [Astyanax mexicanus])	gi|13431711|sp|Q90339.2|MYSS_CYPCA(RecName: Full=Myosin heavy chain, fast skeletal muscle)
TRINITY_DN26615_c1_g2	5.67041	1.57e-28	5.33e-27	yes	up	0.03	9.97	XP_016366665.1(PREDICTED: uncharacterized protein LOC107707206 [Sinocyclocheilus rhinocerous])	None
TRINITY_DN41631_c0_g1	-2.88034	1.63e-28	5.55e-27	yes	down	2.28	0.27	XP_022530756.1(uncharacterized protein LOC111193617 [Astyanax mexicanus])	None
TRINITY_DN49054_c1_g1	-4.4653	1.73e-28	5.88e-27	yes	down	9.96	0.61	None	None
TRINITY_DN37188_c0_g1	7.80896	2.15e-28	7.26e-27	yes	up	0	6.48	None	None
TRINITY_DN47428_c3_g1	-1.25986	2.22e-28	7.49e-27	yes	down	5.26	2.3	XP_016319437.1(PREDICTED: uncharacterized protein LOC107671095 isoform X2 [Sinocyclocheilus anshuiensis])	None
TRINITY_DN29134_c2_g1	2.54972	2.26e-28	7.63e-27	yes	up	0.46	2.81	XP_016360270.1(PREDICTED: long-chain-fatty-acid--CoA ligase 5-like [Sinocyclocheilus anshuiensis])	gi|6016484|sp|O88813.1|ACSL5_RAT(RecName: Full=Long-chain-fatty-acid--CoA ligase 5; AltName: Full=Long-chain acyl-CoA synthetase 5; Short=LACS 5)
TRINITY_DN23692_c1_g1	5.09694	2.34e-28	7.9e-27	yes	up	0.06	2.1	XP_019715163.1(PREDICTED: zinc finger BED domain-containing protein 1-like [Hippocampus comes])	gi|41018380|sp|O96006.1|ZBED1_HUMAN(RecName: Full=Zinc finger BED domain-containing protein 1; AltName: Full=Putative Ac-like transposable element; AltName: Full=dREF homolog)
TRINITY_DN36807_c0_g1	-2.6441	2.39e-28	8.04e-27	yes	down	4.02	0.61	XP_018932948.1(PREDICTED: uncharacterized protein LOC109060252 [Cyprinus carpio])	None
TRINITY_DN40083_c0_g1	7.80445	2.54e-28	8.52e-27	yes	up	0	7.4	None	None
TRINITY_DN28378_c0_g1	2.75849	2.56e-28	8.6e-27	yes	up	2.73	11.35	None	None
TRINITY_DN46360_c1_g4	1.50703	4.06e-28	1.36e-26	yes	up	24.98	74.26	None	None
TRINITY_DN28648_c2_g1	-3.83143	4.36e-28	1.45e-26	yes	down	3.49	0.27	XP_019209423.1(PREDICTED: uncharacterized protein LOC109198422 [Oreochromis niloticus])	None
TRINITY_DN33749_c0_g5	-2.86389	4.79e-28	1.59e-26	yes	down	276.26	37.49	BAE46429.1(ORF2-encoded protein, partial [Danio rerio])	None
TRINITY_DN48903_c6_g1	-1.15605	4.99e-28	1.65e-26	yes	down	5.26	2.15	XP_016390121.1(PREDICTED: partner and localizer of BRCA2 [Sinocyclocheilus rhinocerous])	gi|74727919|sp|Q86YC2.1|PALB2_HUMAN(RecName: Full=Partner and localizer of BRCA2)
TRINITY_DN24111_c0_g1	2.70462	6.61e-28	2.18e-26	yes	up	7.25	53.4	None	None
TRINITY_DN31278_c1_g1	2.9243	7.15e-28	2.36e-26	yes	up	0.46	4.07	None	None
TRINITY_DN45463_c3_g1	-1.12792	7.3e-28	2.4e-26	yes	down	46.33	23.71	None	None
TRINITY_DN49199_c4_g2	-1.09547	7.38e-28	2.42e-26	yes	down	12.06	4.58	XP_016398824.1(PREDICTED: anion exchange protein 2-like [Sinocyclocheilus rhinocerous])	gi|85687559|sp|P04920.4|B3A2_HUMAN(RecName: Full=Anion exchange protein 2; Short=AE 2; Short=Anion exchanger 2; AltName: Full=Non-erythroid band 3-like protein; Short=BND3L; AltName: Full=Solute carrier family 4 member 2)
TRINITY_DN35651_c0_g3	1.83377	7.52e-28	2.47e-26	yes	up	0.59	2.21	XP_021331267.1(uncharacterized protein LOC110439519 [Danio rerio])	gi|130405|sp|P04323.1|POL3_DROME(RecName: Full=Retrovirus-related Pol polyprotein from transposon 17.6; Includes: RecName: Full=Protease; Includes: RecName: Full=Reverse transcriptase; Includes: RecName: Full=Endonuclease)
TRINITY_DN29025_c0_g2	1.98548	7.66e-28	2.51e-26	yes	up	1.4	5.79	XP_016323585.1(PREDICTED: P2X purinoceptor 3-like isoform X1 [Sinocyclocheilus anshuiensis])	gi|259016295|sp|P56373.2|P2RX3_HUMAN(RecName: Full=P2X purinoceptor 3; Short=P2X3; AltName: Full=ATP receptor; AltName: Full=Purinergic receptor)
TRINITY_DN31920_c1_g5	-3.12426	8.65e-28	2.82e-26	yes	down	6.16	0.74	XP_016422649.1(PREDICTED: uncharacterized protein LOC107751434 [Sinocyclocheilus rhinocerous])	None
TRINITY_DN47956_c3_g1	1.09344	9.53e-28	3.11e-26	yes	up	8.12	22.48	None	None
TRINITY_DN24957_c0_g2	6.65311	1.16e-27	3.77e-26	yes	up	0.41	82.56	XP_018945085.1(PREDICTED: myosin heavy chain, fast skeletal muscle-like [Cyprinus carpio])	gi|13431711|sp|Q90339.2|MYSS_CYPCA(RecName: Full=Myosin heavy chain, fast skeletal muscle)
TRINITY_DN28664_c0_g1	-3.29538	1.23e-27	3.99e-26	yes	down	1.67	0.13	XP_016348671.1(PREDICTED: probable ATP-dependent DNA helicase HFM1 isoform X1 [Sinocyclocheilus anshuiensis])	gi|171769820|sp|A2RUV5.1|HFM1_XENTR(RecName: Full=Probable ATP-dependent DNA helicase HFM1)
TRINITY_DN43239_c0_g1	1.28398	1.43e-27	4.62e-26	yes	up	2.63	4.68	XP_016329527.1(PREDICTED: T-lymphoma invasion and metastasis-inducing protein 2-like isoform X1 [Sinocyclocheilus anshuiensis])	gi|296453025|sp|Q8IVF5.4|TIAM2_HUMAN(RecName: Full=T-lymphoma invasion and metastasis-inducing protein 2; Short=TIAM-2; AltName: Full=SIF and TIAM1-like exchange factor)
TRINITY_DN23215_c4_g1	2.12366	1.74e-27	5.58e-26	yes	up	23	49.59	None	None
TRINITY_DN26379_c1_g3	-4.93923	1.89e-27	6.08e-26	yes	down	4.93	0.17	XP_007246839.2(structural maintenance of chromosomes protein 1A [Astyanax mexicanus])	gi|29336622|sp|Q14683.2|SMC1A_HUMAN(RecName: Full=Structural maintenance of chromosomes protein 1A; Short=SMC protein 1A; Short=SMC-1-alpha; Short=SMC-1A; AltName: Full=Sb1.8)
TRINITY_DN26028_c0_g1	5.61151	1.91e-27	6.14e-26	yes	up	0.04	1.54	XP_016419173.1(PREDICTED: free fatty acid receptor 3-like [Sinocyclocheilus rhinocerous])	gi|90101293|sp|Q3UFD7.1|FFAR3_MOUSE(RecName: Full=Free fatty acid receptor 3; AltName: Full=G-protein coupled receptor 41)
TRINITY_DN22212_c1_g2	3.28959	2.04e-27	6.51e-26	yes	up	0.22	2.31	XP_016425071.1(PREDICTED: sorting nexin-8 isoform X2 [Sinocyclocheilus rhinocerous])	gi|10720288|sp|Q9Y5X2.1|SNX8_HUMAN(RecName: Full=Sorting nexin-8)
TRINITY_DN23926_c2_g1	2.95381	2.13e-27	6.8e-26	yes	up	8.08	70.22	None	None
TRINITY_DN23816_c0_g3	-1.5456	2.29e-27	7.31e-26	yes	down	48.92	21.31	XP_019222841.1(PREDICTED: uncharacterized protein LOC109194245 [Oreochromis niloticus])	None
TRINITY_DN27197_c0_g1	-1.12658	2.51e-27	8.02e-26	yes	down	23.87	14.91	XP_016347817.1(PREDICTED: proto-oncogene tyrosine-protein kinase ROS-like [Sinocyclocheilus anshuiensis])	gi|57013873|sp|P08941.3|ROS1_CHICK(RecName: Full=Proto-oncogene tyrosine-protein kinase ROS; AltName: Full=Proto-oncogene c-Ros; AltName: Full=Proto-oncogene c-Ros-1; AltName: Full=Receptor tyrosine kinase c-ros oncogene 1; AltName: Full=c-Ros receptor tyrosine kinase; Flags: Precursor)
TRINITY_DN41997_c2_g1	-8.07674	3.13e-27	9.96e-26	yes	down	1.42	0	XP_021169515.1(uncharacterized protein LOC110367604 [Fundulus heteroclitus])	gi|130407|sp|P10394.1|POL4_DROME(RecName: Full=Retrovirus-related Pol polyprotein from transposon 412; Includes: RecName: Full=Protease; Includes: RecName: Full=Reverse transcriptase; Includes: RecName: Full=Endonuclease)
TRINITY_DN46911_c2_g3	-2.79461	3.52e-27	1.12e-25	yes	down	33.16	4.36	XP_018971271.1(PREDICTED: uncharacterized protein LOC109102372 [Cyprinus carpio])	None
TRINITY_DN24779_c0_g1	-3.34082	4.37e-27	1.39e-25	yes	down	3.42	1.02	XP_022063315.1(uncharacterized protein LOC110960395 [Acanthochromis polyacanthus])	None
TRINITY_DN46425_c1_g3	1.91344	4.85e-27	1.53e-25	yes	up	2.76	10.91	KTF86318.1(hypothetical protein cypCar_00040795 [Cyprinus carpio])	gi|67460124|sp|Q9QYC5.1|ETBR2_RAT(RecName: Full=Prosaposin receptor GPR37L1; AltName: Full=Endothelin B receptor-like protein 2; Short=ETBR-LP-2; AltName: Full=G-protein coupled receptor 37-like 1; AltName: Full=G-protein coupled receptor CNS2; Flags: Precursor)
TRINITY_DN30273_c1_g5	-8.06356	4.96e-27	1.57e-25	yes	down	2.08	0	XP_016341263.1(PREDICTED: RNA-directed DNA polymerase from mobile element jockey-like [Sinocyclocheilus anshuiensis])	gi|74825508|sp|Q9NBX4.1|RTXE_DROME(RecName: Full=Probable RNA-directed DNA polymerase from transposon X-element; AltName: Full=Reverse transcriptase)
TRINITY_DN32205_c0_g2	-5.30586	5.28e-27	1.67e-25	yes	down	32.39	0.72	None	None
TRINITY_DN29622_c1_g3	6.61151	5.72e-27	1.8e-25	yes	up	0.02	1.96	XP_016340398.1(PREDICTED: coagulation factor XIII A chain-like [Sinocyclocheilus anshuiensis])	gi|57012728|sp|O08619.3|F13A_RAT(RecName: Full=Coagulation factor XIII A chain; Short=Coagulation factor XIIIa; AltName: Full=Protein-glutamine gamma-glutamyltransferase A chain; AltName: Full=Transglutaminase A chain; Flags: Precursor)
TRINITY_DN33721_c0_g1	-1.16282	5.95e-27	1.87e-25	yes	down	15.51	7.26	XP_021324450.1(glutamate receptor, ionotropic, AMPA 4b isoform X5 [Danio rerio])	None
TRINITY_DN26205_c0_g1	2.44391	5.99e-27	1.89e-25	yes	up	0.43	2.43	XP_016373586.1(PREDICTED: collagen alpha-2(IX) chain-like [Sinocyclocheilus rhinocerous])	gi|51338756|sp|P12108.3|CO9A2_CHICK(RecName: Full=Collagen alpha-2(IX) chain; Flags: Precursor)
TRINITY_DN40414_c0_g1	2.56445	6.03e-27	1.89e-25	yes	up	0.65	10.97	XP_016350732.1(PREDICTED: E3 ubiquitin-protein ligase Topors-like isoform X2 [Sinocyclocheilus anshuiensis])	gi|81895461|sp|Q80Z37.1|TOPRS_MOUSE(RecName: Full=E3 ubiquitin-protein ligase Topors; AltName: Full=SUMO1-protein E3 ligase Topors; AltName: Full=Topoisomerase I-binding RING finger protein; AltName: Full=Topoisomerase I-binding arginine/serine-rich protein; AltName: Full=Tumor suppressor p53-binding protein 3; Short=p53-binding protein 3; Short=p53BP3)
TRINITY_DN49177_c2_g2	-3.77951	6.45e-27	2.02e-25	yes	down	9.74	1.36	None	None
TRINITY_DN49215_c5_g2	1.85385	6.54e-27	2.05e-25	yes	up	1.75	2.63	CBN81752.1(Pol polyprotein [Dicentrarchus labrax])	gi|558446106|sp|P0CT34.1|TF21_SCHPO(RecName: Full=Transposon Tf2-1 polyprotein; AltName: Full=Retrotransposable element Tf2 155 kDa protein >gi|558446108|sp|P0CT35.1|TF22_SCHPO RecName: Full=Transposon Tf2-2 polyprotein; AltName: Full=Retrotransposable element Tf2 155 kDa protein >gi|558446112|sp|P0CT37.1|TF24_SCHPO RecName: Full=Transposon Tf2-4 polyprotein; AltName: Full=Retrotransposable eleme…
TRINITY_DN40847_c2_g2	-2.26435	7.32e-27	2.29e-25	yes	down	17.68	3.85	None	None
TRINITY_DN39394_c0_g2	-1.37645	7.38e-27	2.3e-25	yes	down	29.87	19.21	None	None
TRINITY_DN29299_c1_g1	-3.03555	7.73e-27	2.41e-25	yes	down	19.59	2.6	CDQ73166.1(unnamed protein product [Oncorhynchus mykiss])	gi|82135458|sp|Q8QHJ8.1|XPO6_DANRE(RecName: Full=Exportin-6; Short=Exp6)
TRINITY_DN35928_c0_g1	-2.43977	8.48e-27	2.63e-25	yes	down	6.85	1.47	BAB83841.1(ReO_6 [Oryzias latipes])	None
TRINITY_DN18965_c3_g2	-4.38284	8.89e-27	2.76e-25	yes	down	5.38	0.39	XP_018980669.1(PREDICTED: uncharacterized protein LOC109112124 [Cyprinus carpio])	None
TRINITY_DN35606_c2_g1	7.69331	1.37e-26	4.25e-25	yes	up	0	1.61	XP_016085755.1(PREDICTED: uncharacterized protein LOC107549257 [Sinocyclocheilus grahami])	None
TRINITY_DN45187_c1_g2	-2.43115	1.51e-26	4.67e-25	yes	down	13.36	3.35	None	None
TRINITY_DN35138_c1_g3	5.0023	1.52e-26	4.68e-25	yes	up	0.05	1.73	XP_015809324.1(PREDICTED: uncharacterized protein LOC107381899 [Nothobranchius furzeri])	None
TRINITY_DN36828_c1_g3	-1.5351	1.53e-26	4.69e-25	yes	down	8.13	2.94	XP_016391025.1(PREDICTED: ADM2-like [Sinocyclocheilus rhinocerous])	gi|47115522|sp|P61312.1|ADM2_RAT(RecName: Full=ADM2; AltName: Full=Intermedin; Contains: RecName: Full=Adrenomedullin-2; Short=AM2; AltName: Full=Intermedin-long; Short=IMDL; Contains: RecName: Full=Intermedin-short; Short=IMDS; Flags: Precursor)
TRINITY_DN25337_c0_g3	1.54036	1.54e-26	4.73e-25	yes	up	36.49	301.34	None	None
TRINITY_DN28724_c0_g3	4.62349	1.62e-26	4.97e-25	yes	up	0.14	3.73	XP_007259995.2(desmin-like isoform X2 [Astyanax mexicanus])	gi|118453|sp|P02542.1|DESM_CHICK(RecName: Full=Desmin)
TRINITY_DN24425_c0_g1	1.45951	1.76e-26	5.39e-25	yes	up	4.08	11.75	KTF91562.1(hypothetical protein cypCar_00037100 [Cyprinus carpio])	gi|82198389|sp|Q66I24.1|ASSY_DANRE(RecName: Full=Argininosuccinate synthase; AltName: Full=Citrulline--aspartate ligase)
TRINITY_DN17760_c0_g1	-3.88034	1.8e-26	5.5e-25	yes	down	5.45	0.39	None	None
TRINITY_DN44708_c1_g2	-2.36409	1.82e-26	5.55e-25	yes	down	10.03	3.49	None	None
TRINITY_DN37624_c2_g1	-2.69747	2.04e-26	6.2e-25	yes	down	1.66	0.27	XP_018942780.1(PREDICTED: RNA-directed DNA polymerase from mobile element jockey-like [Cyprinus carpio])	gi|134083|sp|P21328.1|RTJK_DROME(RecName: Full=RNA-directed DNA polymerase from mobile element jockey; AltName: Full=Reverse transcriptase)
TRINITY_DN43745_c0_g1	-1.89311	2.24e-26	6.81e-25	yes	down	3.8	0.37	XP_023698428.1(uncharacterized protein LOC111859709 [Paramormyrops kingsleyae])	gi|38258172|sp|Q8I7P9.1|POL5_DROME(RecName: Full=Retrovirus-related Pol polyprotein from transposon opus; Includes: RecName: Full=Protease; Includes: RecName: Full=Reverse transcriptase; Includes: RecName: Full=Endonuclease)
TRINITY_DN38416_c2_g1	1.34452	2.75e-26	8.34e-25	yes	up	2.15	6.25	XP_016401877.1(PREDICTED: myosin regulatory light chain 2B, cardiac muscle isoform-like [Sinocyclocheilus rhinocerous])	gi|143811419|sp|P02611.2|MLRB_CHICK(RecName: Full=Myosin regulatory light chain 2B, cardiac muscle isoform; Short=G2; Short=MLC-2B)
TRINITY_DN23202_c0_g1	-1.1748	2.77e-26	8.39e-25	yes	down	229.8	104.7	None	None
TRINITY_DN44760_c0_g2	2.44878	2.85e-26	8.6e-25	yes	up	0.85	4.55	XP_016331942.1(PREDICTED: M-protein, striated muscle-like isoform X4 [Sinocyclocheilus anshuiensis])	gi|224471842|sp|P54296.2|MYOM2_HUMAN(RecName: Full=Myomesin-2; AltName: Full=165 kDa connectin-associated protein; AltName: Full=165 kDa titin-associated protein; AltName: Full=M-protein; AltName: Full=Myomesin family member 2)
TRINITY_DN21896_c0_g3	3.41512	3.41e-26	1.03e-24	yes	up	2.52	22.8	None	None
TRINITY_DN29256_c1_g2	-4.86857	4.14e-26	1.24e-24	yes	down	7.23	0.26	None	None
TRINITY_DN35779_c3_g4	1.65405	4.23e-26	1.27e-24	yes	up	5.86	19.34	None	None
TRINITY_DN31713_c1_g1	-1.50541	4.5e-26	1.35e-24	yes	down	14.08	4.57	XP_019124950.1(PREDICTED: uncharacterized protein LOC109140919 [Larimichthys crocea])	gi|146291076|sp|Q7LHG5.2|YI31B_YEAST(RecName: Full=Transposon Ty3-I Gag-Pol polyprotein; AltName: Full=Gag3-Pol3; AltName: Full=Transposon Ty3-2 TYA-TYB polyprotein; Contains: RecName: Full=Capsid protein; Short=CA; AltName: Full=p24; Contains: RecName: Full=Spacer peptide p3; Contains: RecName: Full=Nucleocapsid protein p11; Short=NC; Contains: RecName: Full=Ty3 protease; Short=PR; AltName: Full…
TRINITY_DN27544_c0_g1	2.44104	4.65e-26	1.39e-24	yes	up	4.52	33.66	None	None
TRINITY_DN19697_c0_g1	-1.84471	4.76e-26	1.42e-24	yes	down	63.43	22.74	None	None
TRINITY_DN25988_c1_g1	2.06857	4.87e-26	1.45e-24	yes	up	18.21	31.87	None	None
TRINITY_DN47488_c1_g2	1.15647	5.59e-26	1.67e-24	yes	up	8.88	10.39	KKF19921.1(Retrotransposable element Tf2 protein type 1 [Larimichthys crocea])	gi|558446106|sp|P0CT34.1|TF21_SCHPO(RecName: Full=Transposon Tf2-1 polyprotein; AltName: Full=Retrotransposable element Tf2 155 kDa protein >gi|558446108|sp|P0CT35.1|TF22_SCHPO RecName: Full=Transposon Tf2-2 polyprotein; AltName: Full=Retrotransposable element Tf2 155 kDa protein >gi|558446112|sp|P0CT37.1|TF24_SCHPO RecName: Full=Transposon Tf2-4 polyprotein; AltName: Full=Retrotransposable eleme…
TRINITY_DN46818_c2_g1	-2.05659	6.06e-26	1.8e-24	yes	down	1.62	0.87	XP_016392820.1(PREDICTED: uncharacterized protein LOC107727458 [Sinocyclocheilus rhinocerous])	gi|141475|sp|P14381.1|YTX2_XENLA(RecName: Full=Transposon TX1 uncharacterized 149 kDa protein; AltName: Full=ORF 2)
TRINITY_DN30386_c1_g2	2.7128	6.23e-26	1.85e-24	yes	up	0.26	1.77	BAB83841.1(ReO_6 [Oryzias latipes])	gi|74821373|sp|Q95SX7.1|RTBS_DROME(RecName: Full=Probable RNA-directed DNA polymerase from transposon BS; AltName: Full=Reverse transcriptase)
TRINITY_DN37633_c1_g4	-4.33977	6.4e-26	1.9e-24	yes	down	1.26	0.07	XP_012675614.1(PREDICTED: uncharacterized protein LOC105893702 [Clupea harengus])	gi|75052143|sp|Q588U8.1|CFDP2_TRAJA(RecName: Full=Craniofacial development protein 2; AltName: Full=p97 bucentaur protein)
TRINITY_DN30368_c0_g1	-7.98188	7.97e-26	2.35e-24	yes	down	7.37	0	XP_022521892.1(uncharacterized protein LOC111191365 [Astyanax mexicanus])	None
TRINITY_DN25337_c0_g4	1.97834	9.07e-26	2.67e-24	yes	up	5.83	24.06	None	None
TRINITY_DN33524_c0_g1	-1.67529	9.51e-26	2.8e-24	yes	down	69.25	24.58	None	None
TRINITY_DN22290_c3_g1	-6.84996	1.05e-25	3.08e-24	yes	down	14.84	0.14	None	None
TRINITY_DN33383_c0_g3	-6.84996	1.05e-25	3.08e-24	yes	down	1.18	0.01	XP_024661871.1(uncharacterized protein K02A2.6-like [Maylandia zebra])	gi|558446103|sp|P0CT41.1|TF212_SCHPO(RecName: Full=Transposon Tf2-12 polyprotein; AltName: Full=Retrotransposable element Tf2 155 kDa protein >gi|558446110|sp|P0CT36.1|TF23_SCHPO RecName: Full=Transposon Tf2-3 polyprotein; AltName: Full=Retrotransposable element Tf2 155 kDa protein >gi|558446114|sp|P0CT38.1|TF25_SCHPO RecName: Full=Transposon Tf2-5 polyprotein; AltName: Full=Retrotransposable ele…
TRINITY_DN35558_c0_g1	-1.83709	1.05e-25	3.08e-24	yes	down	2.71	0.6	XP_017539894.1(PREDICTED: uncharacterized protein K02A2.6-like [Pygocentrus nattereri])	gi|558446106|sp|P0CT34.1|TF21_SCHPO(RecName: Full=Transposon Tf2-1 polyprotein; AltName: Full=Retrotransposable element Tf2 155 kDa protein >gi|558446108|sp|P0CT35.1|TF22_SCHPO RecName: Full=Transposon Tf2-2 polyprotein; AltName: Full=Retrotransposable element Tf2 155 kDa protein >gi|558446112|sp|P0CT37.1|TF24_SCHPO RecName: Full=Transposon Tf2-4 polyprotein; AltName: Full=Retrotransposable eleme…
TRINITY_DN30039_c1_g1	-1.69895	1.11e-25	3.26e-24	yes	down	156.74	62.68	XP_015810193.1(PREDICTED: uncharacterized protein LOC107382537, partial [Nothobranchius furzeri])	None
TRINITY_DN37213_c1_g4	3.29957	1.16e-25	3.38e-24	yes	up	0.15	1.59	XP_021332211.1(uncharacterized protein LOC101886116 [Danio rerio])	gi|130407|sp|P10394.1|POL4_DROME(RecName: Full=Retrovirus-related Pol polyprotein from transposon 412; Includes: RecName: Full=Protease; Includes: RecName: Full=Reverse transcriptase; Includes: RecName: Full=Endonuclease)
TRINITY_DN19239_c1_g1	-1.26446	1.29e-25	3.77e-24	yes	down	99.89	57.59	XP_021172948.1(peptidyl-tRNA hydrolase ICT1, mitochondrial isoform X1 [Fundulus heteroclitus])	gi|464864|sp|P35072.1|TCB1_CAEBR(RecName: Full=Transposable element Tcb1 transposase; AltName: Full=Transposable element Barney transposase)
TRINITY_DN31065_c1_g1	-3.8397	1.3e-25	3.78e-24	yes	down	11.43	1.19	None	None
TRINITY_DN41023_c1_g1	4.07386	1.38e-25	4.02e-24	yes	up	0.19	6.86	None	None
TRINITY_DN30284_c1_g2	-1.91044	1.41e-25	4.1e-24	yes	down	6.32	7.81	XP_009296628.1(uncharacterized protein K02A2.6-like [Danio rerio])	gi|146291076|sp|Q7LHG5.2|YI31B_YEAST(RecName: Full=Transposon Ty3-I Gag-Pol polyprotein; AltName: Full=Gag3-Pol3; AltName: Full=Transposon Ty3-2 TYA-TYB polyprotein; Contains: RecName: Full=Capsid protein; Short=CA; AltName: Full=p24; Contains: RecName: Full=Spacer peptide p3; Contains: RecName: Full=Nucleocapsid protein p11; Short=NC; Contains: RecName: Full=Ty3 protease; Short=PR; AltName: Full…
TRINITY_DN21769_c2_g2	-5.21821	1.94e-25	5.62e-24	yes	down	11.81	1.61	None	None
TRINITY_DN20254_c0_g1	-1.92926	1.95e-25	5.64e-24	yes	down	190.21	46.55	None	None
TRINITY_DN29264_c2_g1	-7.95359	2.03e-25	5.87e-24	yes	down	4.78	0	XP_023816647.1(uncharacterized protein LOC105354973 isoform X2 [Oryzias latipes])	None
TRINITY_DN46230_c0_g3	2.18802	2.63e-25	7.58e-24	yes	up	2.3	9.84	None	None
TRINITY_DN27785_c0_g1	-2.92543	2.71e-25	7.8e-24	yes	down	40.29	6.05	None	None
TRINITY_DN24933_c0_g2	-2.97057	2.79e-25	8.02e-24	yes	down	28.49	2.77	XP_018925955.1(PREDICTED: small integral membrane protein 1-like isoform X1 [Cyprinus carpio])	gi|218551781|sp|B3DHH5.1|SMIM1_DANRE(RecName: Full=Small integral membrane protein 1)
TRINITY_DN37177_c0_g1	-1.54644	2.96e-25	8.49e-24	yes	down	8.48	2.23	XP_009304677.1(serine/threonine-protein kinase TAO2 isoform X2 [Danio rerio])	None
TRINITY_DN31413_c2_g1	5.48598	2.98e-25	8.52e-24	yes	up	0.06	2.98	XP_017555450.1(PREDICTED: zinc transporter 2-like [Pygocentrus nattereri])	gi|8134839|sp|Q62941.1|ZNT2_RAT(RecName: Full=Zinc transporter 2; Short=ZnT-2; AltName: Full=Solute carrier family 30 member 2)
TRINITY_DN41140_c1_g1	-3.33351	3.17e-25	9.06e-24	yes	down	5.39	2.82	None	None
TRINITY_DN36582_c0_g1	1.05877	3.74e-25	1.07e-23	yes	up	2.15	4.7	XP_023665577.1(uncharacterized protein K02A2.6-like [Paramormyrops kingsleyae])	gi|38258172|sp|Q8I7P9.1|POL5_DROME(RecName: Full=Retrovirus-related Pol polyprotein from transposon opus; Includes: RecName: Full=Protease; Includes: RecName: Full=Reverse transcriptase; Includes: RecName: Full=Endonuclease)
TRINITY_DN46382_c2_g2	3.19401	3.77e-25	1.08e-23	yes	up	0.2	1.92	XP_021324627.1(uncharacterized protein LOC110438216 [Danio rerio])	gi|38258172|sp|Q8I7P9.1|POL5_DROME(RecName: Full=Retrovirus-related Pol polyprotein from transposon opus; Includes: RecName: Full=Protease; Includes: RecName: Full=Reverse transcriptase; Includes: RecName: Full=Endonuclease)
TRINITY_DN31243_c0_g1	-1.62	3.79e-25	1.08e-23	yes	down	8.72	3.06	XP_021332211.1(uncharacterized protein LOC101886116 [Danio rerio])	gi|130407|sp|P10394.1|POL4_DROME(RecName: Full=Retrovirus-related Pol polyprotein from transposon 412; Includes: RecName: Full=Protease; Includes: RecName: Full=Reverse transcriptase; Includes: RecName: Full=Endonuclease)
TRINITY_DN33605_c1_g3	3.47016	3.94e-25	1.12e-23	yes	up	0.41	4.72	None	None
TRINITY_DN49144_c7_g3	-2.64789	4.15e-25	1.18e-23	yes	down	12.28	2.96	None	None
TRINITY_DN27116_c1_g2	2.37818	4.58e-25	1.3e-23	yes	up	4.46	15.99	None	None
TRINITY_DN28703_c0_g1	2.81425	5.02e-25	1.42e-23	yes	up	0.25	1.88	XP_019213821.1(PREDICTED: uncharacterized protein LOC106098316 isoform X1 [Oreochromis niloticus])	None
TRINITY_DN28881_c3_g6	-3.40229	5.27e-25	1.49e-23	yes	down	1.19	0.12	XP_024122537.1(uncharacterized protein LOC112143031 [Oryzias melastigma])	gi|141475|sp|P14381.1|YTX2_XENLA(RecName: Full=Transposon TX1 uncharacterized 149 kDa protein; AltName: Full=ORF 2)
TRINITY_DN48908_c3_g1	-1.11034	5.39e-25	1.52e-23	yes	down	14.56	7.07	None	None
TRINITY_DN39308_c0_g3	6.48598	5.6e-25	1.58e-23	yes	up	0.02	1.54	XP_018942142.1(PREDICTED: uncharacterized protein LOC109069984 [Cyprinus carpio])	None
TRINITY_DN32467_c0_g3	3.18409	6.35e-25	1.79e-23	yes	up	0.87	11.9	XP_014834495.1(PREDICTED: uncharacterized protein LOC106912169 isoform X2 [Poecilia mexicana])	gi|13124684|sp|P04146.3|COPIA_DROME(RecName: Full=Copia protein; AltName: Full=Gag-int-pol protein; Contains: RecName: Full=Copia VLP protein; Contains: RecName: Full=Copia protease)
TRINITY_DN42993_c0_g2	-1.62552	6.54e-25	1.84e-23	yes	down	22.75	4.54	XP_016148432.1(PREDICTED: nose resistant to fluoxetine protein 6-like [Sinocyclocheilus grahami])	gi|21264475|sp|Q09225.3|NRF6_CAEEL(RecName: Full=Nose resistant to fluoxetine protein 6; Short=Protein nrf-6; Flags: Precursor)
TRINITY_DN24396_c2_g1	4.53751	6.76e-25	1.9e-23	yes	up	0.09	4	XP_018952128.1(PREDICTED: uncharacterized protein LOC109081593 isoform X1 [Cyprinus carpio])	None
TRINITY_DN42485_c0_g1	1.3884	7.5e-25	2.1e-23	yes	up	12.64	24.51	None	None
TRINITY_DN27078_c0_g1	-4.28027	8.9e-25	2.49e-23	yes	down	5.77	0.92	None	None
TRINITY_DN33610_c2_g1	-2.7765	9.15e-25	2.56e-23	yes	down	240.92	17	None	None
TRINITY_DN32318_c1_g1	1.65479	1.05e-24	2.94e-23	yes	up	1.7	3.74	XP_011607937.1(PREDICTED: uncharacterized protein K02A2.6-like [Takifugu rubripes])	gi|558446103|sp|P0CT41.1|TF212_SCHPO(RecName: Full=Transposon Tf2-12 polyprotein; AltName: Full=Retrotransposable element Tf2 155 kDa protein >gi|558446110|sp|P0CT36.1|TF23_SCHPO RecName: Full=Transposon Tf2-3 polyprotein; AltName: Full=Retrotransposable element Tf2 155 kDa protein >gi|558446114|sp|P0CT38.1|TF25_SCHPO RecName: Full=Transposon Tf2-5 polyprotein; AltName: Full=Retrotransposable ele…
TRINITY_DN28853_c0_g3	-1.81543	1.17e-24	3.27e-23	yes	down	38.19	20.76	None	None
TRINITY_DN48208_c5_g1	-4.78803	1.18e-24	3.28e-23	yes	down	11.06	0.4	None	None
TRINITY_DN46709_c1_g7	-2.26143	1.24e-24	3.45e-23	yes	down	18.72	4.28	None	None
TRINITY_DN48079_c4_g1	-3.10273	1.52e-24	4.22e-23	yes	down	7.26	0.85	BAB83841.1(ReO_6 [Oryzias latipes])	gi|134083|sp|P21328.1|RTJK_DROME(RecName: Full=RNA-directed DNA polymerase from mobile element jockey; AltName: Full=Reverse transcriptase)
TRINITY_DN20612_c0_g1	-3.10261	1.53e-24	4.24e-23	yes	down	62.34	11.1	None	None
TRINITY_DN18193_c0_g1	-3.04431	1.61e-24	4.45e-23	yes	down	0.92	0.12	XP_017207046.1(uncharacterized protein LOC101886504 [Danio rerio])	None
TRINITY_DN20775_c0_g1	-3.04431	1.61e-24	4.45e-23	yes	down	9.34	7.03	KTF90518.1(hypothetical protein cypCar_00034821, partial [Cyprinus carpio])	None
TRINITY_DN41731_c4_g2	1.57169	1.67e-24	4.59e-23	yes	up	76.89	235.8	None	None
TRINITY_DN45291_c1_g2	-2.7657	1.69e-24	4.64e-23	yes	down	16.96	1.75	None	None
TRINITY_DN22409_c1_g1	-1.81908	1.74e-24	4.8e-23	yes	down	222.06	67.6	None	None
TRINITY_DN41777_c0_g1	-1.15606	2.08e-24	5.7e-23	yes	down	10.04	3.52	XP_017568429.1(PREDICTED: SLAIN motif-containing protein 1-like isoform X2 [Pygocentrus nattereri])	gi|166977683|sp|A8E4V2.2|SLAI1_XENTR(RecName: Full=SLAIN motif-containing protein 1)
TRINITY_DN35924_c1_g1	-4.07298	2.18e-24	5.97e-23	yes	down	38.08	1.98	None	None
TRINITY_DN43908_c1_g2	-1.00109	2.18e-24	5.97e-23	yes	down	16.96	8.96	XP_005159162.1(choline kinase alpha isoform X1 [Danio rerio])	gi|6686290|sp|Q01134.2|CHKA_RAT(RecName: Full=Choline kinase alpha; Short=CK; AltName: Full=CHETK-alpha; AltName: Full=Ethanolamine kinase; Short=EK)
TRINITY_DN35045_c0_g1	2.40889	2.3e-24	6.29e-23	yes	up	22.22	36.9	XP_016396749.1(PREDICTED: coxsackievirus and adenovirus receptor homolog [Sinocyclocheilus rhinocerous])	gi|71153254|sp|Q90Y50.1|CXAR_DANRE(RecName: Full=Coxsackievirus and adenovirus receptor homolog; Short=CAR; Flags: Precursor)
TRINITY_DN24185_c2_g2	-4.77111	2.33e-24	6.36e-23	yes	down	1.32	0.05	XP_021172080.1(uncharacterized protein LOC110368545 [Fundulus heteroclitus])	gi|130582|sp|P10978.1|POLX_TOBAC(RecName: Full=Retrovirus-related Pol polyprotein from transposon TNT 1-94; Includes: RecName: Full=Protease; Includes: RecName: Full=Reverse transcriptase; Includes: RecName: Full=Endonuclease)
TRINITY_DN30522_c0_g2	2.5365	2.42e-24	6.59e-23	yes	up	0.51	2.61	XP_016341315.1(PREDICTED: uncharacterized protein LOC107688212 isoform X1 [Sinocyclocheilus anshuiensis])	None
TRINITY_DN37144_c0_g3	-2.08505	2.66e-24	7.23e-23	yes	down	8.12	1.95	XP_019907057.1(PREDICTED: DNA transposase THAP9 isoform X2 [Esox lucius])	gi|88926256|sp|Q7M3K2.2|PELET_DROME(RecName: Full=Transposable element P transposase; Short=P-element transposase; AltName: Full=THAP domain-containing protein; Short=DmTHAP)
TRINITY_DN33855_c1_g1	2.57087	2.69e-24	7.3e-23	yes	up	2.16	9.22	XP_016419783.1(PREDICTED: uncharacterized protein LOC107749199 [Sinocyclocheilus rhinocerous])	None
TRINITY_DN23615_c0_g2	-6.75481	2.79e-24	7.58e-23	yes	down	2.56	0.02	XP_020785585.1(uncharacterized protein LOC110164801 isoform X1 [Boleophthalmus pectinirostris])	None
TRINITY_DN20513_c2_g8	5.42518	2.99e-24	8.1e-23	yes	up	0.72	32.12	None	None
TRINITY_DN18977_c1_g1	-3.45188	3.18e-24	8.57e-23	yes	down	22.71	1.48	KKF23805.1(provirus ancestral Env polyprotein, partial [Larimichthys crocea])	None
TRINITY_DN44951_c0_g2	1.87736	3.33e-24	8.97e-23	yes	up	3.54	13.62	XP_018936054.1(PREDICTED: uncharacterized protein LOC109063428 [Cyprinus carpio])	None
TRINITY_DN46528_c2_g1	2.73142	3.58e-24	9.65e-23	yes	up	0.17	2.28	XP_016424679.1(PREDICTED: Niemann-Pick C1-like protein 1 [Sinocyclocheilus rhinocerous])	gi|425906049|sp|Q9UHC9.2|NPCL1_HUMAN(RecName: Full=Niemann-Pick C1-like protein 1; Flags: Precursor)
TRINITY_DN36228_c0_g2	-2.09478	3.7e-24	9.94e-23	yes	down	1.88	0.46	XP_016393730.1(PREDICTED: uncharacterized protein LOC107728153 [Sinocyclocheilus rhinocerous])	None
TRINITY_DN28043_c0_g1	-2.18967	3.92e-24	1.05e-22	yes	down	6.11	1.41	None	None
TRINITY_DN29471_c0_g1	-2.57695	4.22e-24	1.13e-22	yes	down	16.72	3.72	None	None
TRINITY_DN23699_c0_g4	-5.70477	4.38e-24	1.17e-22	yes	down	2.56	0.03	XP_016151470.1(PREDICTED: uncharacterized protein LOC107603241 [Sinocyclocheilus grahami])	None
TRINITY_DN31380_c0_g1	-6.73832	4.84e-24	1.29e-22	yes	down	1.7	0.02	XP_016379048.1(PREDICTED: protein FAM151A [Sinocyclocheilus rhinocerous])	gi|306755743|sp|A5PN38.1|F151A_DANRE(RecName: Full=Protein FAM151A)
TRINITY_DN24275_c5_g1	1.68526	5.05e-24	1.35e-22	yes	up	1.73	5.76	XP_023269051.1(sterile alpha motif domain-containing protein 3-like [Seriola lalandi dorsalis])	gi|147668009|sp|Q8N6K7.2|SAMD3_HUMAN(RecName: Full=Sterile alpha motif domain-containing protein 3; Short=SAM domain-containing protein 3)
TRINITY_DN29560_c0_g1	2.63751	5.2e-24	1.39e-22	yes	up	3.98	19.87	None	None
TRINITY_DN45476_c1_g2	-2.91596	6.01e-24	1.6e-22	yes	down	25.8	4.78	None	None
TRINITY_DN30761_c1_g2	-3.75481	6.7e-24	1.78e-22	yes	down	2.93	0.59	None	None
TRINITY_DN39120_c0_g3	1.91922	6.91e-24	1.83e-22	yes	up	2.31	9.14	ALM01481.1(cytochrome P450 [Paramisgurnus dabryanus])	gi|6226804|sp|Q92109.2|CP1A3_ONCMY(RecName: Full=Cytochrome P450 1A3; Short=CYP1A3; AltName: Full=CYP1A1)
TRINITY_DN32308_c1_g7	-7.84134	7.18e-24	1.9e-22	yes	down	117.53	0	None	None
TRINITY_DN39712_c1_g1	-2.31375	7.21e-24	1.91e-22	yes	down	8.48	2.59	None	None
TRINITY_DN43821_c0_g1	-1.13806	7.65e-24	2.02e-22	yes	down	16.25	6.27	XP_021334923.1(Werner syndrome ATP-dependent helicase [Danio rerio])	gi|29428101|sp|O93530.1|WRN_XENLA(RecName: Full=Werner syndrome ATP-dependent helicase homolog; AltName: Full=Exonuclease WRN; AltName: Full=Focus-forming activity 1; Short=FFA-1)
TRINITY_DN48606_c2_g4	-2.25179	7.85e-24	2.07e-22	yes	down	10.33	2.27	XP_016314026.1(PREDICTED: somatomedin-B and thrombospondin type-1 domain-containing protein-like [Sinocyclocheilus anshuiensis])	gi|187611420|sp|Q8IVN8.2|SBSPO_HUMAN(RecName: Full=Somatomedin-B and thrombospondin type-1 domain-containing protein; AltName: Full=RPE-spondin; Flags: Precursor)
TRINITY_DN32461_c2_g2	-3.63166	8.23e-24	2.17e-22	yes	down	4.87	1.25	None	None
TRINITY_DN29622_c1_g2	4.84758	8.34e-24	2.19e-22	yes	up	0.05	1.49	XP_016147423.1(PREDICTED: coagulation factor XIII A chain-like [Sinocyclocheilus grahami])	gi|57012822|sp|Q8BH61.3|F13A_MOUSE(RecName: Full=Coagulation factor XIII A chain; Short=Coagulation factor XIIIa; AltName: Full=Protein-glutamine gamma-glutamyltransferase A chain; AltName: Full=Transglutaminase A chain; Flags: Precursor)
TRINITY_DN37109_c1_g2	-7.83453	8.85e-24	2.33e-22	yes	down	7.74	0	None	None
TRINITY_DN18391_c0_g1	-2.59373	9.56e-24	2.51e-22	yes	down	49.86	8.64	None	None
TRINITY_DN46213_c0_g1	4.47281	9.78e-24	2.56e-22	yes	up	0.02	0.46	XP_016375722.1(PREDICTED: titin-like [Sinocyclocheilus rhinocerous])	gi|384872704|sp|Q8WZ42.4|TITIN_HUMAN(RecName: Full=Titin; AltName: Full=Connectin; AltName: Full=Rhabdomyosarcoma antigen MU-RMS-40.14)
TRINITY_DN40366_c1_g2	2.98756	9.84e-24	2.58e-22	yes	up	0.6	4.61	XP_016097785.1(PREDICTED: uncharacterized protein LOC107558640 [Sinocyclocheilus grahami])	None
TRINITY_DN29811_c2_g1	-2.47529	1.02e-23	2.68e-22	yes	down	0.95	0.18	XP_024660844.1(LOW QUALITY PROTEIN: uncharacterized protein LOC106674705 [Maylandia zebra])	gi|130407|sp|P10394.1|POL4_DROME(RecName: Full=Retrovirus-related Pol polyprotein from transposon 412; Includes: RecName: Full=Protease; Includes: RecName: Full=Reverse transcriptase; Includes: RecName: Full=Endonuclease)
TRINITY_DN49013_c2_g2	3.40763	1.08e-23	2.81e-22	yes	up	6.3	68.89	XP_014823266.1(PREDICTED: uncharacterized protein LOC106903790 isoform X2 [Poecilia mexicana])	None
TRINITY_DN33863_c0_g1	-1.32106	1.23e-23	3.2e-22	yes	down	9.2	4.49	XP_016369724.1(PREDICTED: chromobox protein homolog 7-like [Sinocyclocheilus rhinocerous])	gi|17433290|sp|O95931.1|CBX7_HUMAN(RecName: Full=Chromobox protein homolog 7)
TRINITY_DN39958_c1_g1	1.5867	1.26e-23	3.27e-22	yes	up	7.81	9.95	XP_018944291.1(PREDICTED: glucose-6-phosphate isomerase [Cyprinus carpio])	gi|17380385|sp|P06744.4|G6PI_HUMAN(RecName: Full=Glucose-6-phosphate isomerase; Short=GPI; AltName: Full=Autocrine motility factor; Short=AMF; AltName: Full=Neuroleukin; Short=NLK; AltName: Full=Phosphoglucose isomerase; Short=PGI; AltName: Full=Phosphohexose isomerase; Short=PHI; AltName: Full=Sperm antigen 36; Short=SA-36)
TRINITY_DN48085_c7_g1	-1.7176	1.26e-23	3.29e-22	yes	down	27.36	11.88	None	None
TRINITY_DN34939_c0_g1	-3.25621	1.51e-23	3.91e-22	yes	down	8.34	1.37	None	None
TRINITY_DN43298_c2_g1	3.50716	1.64e-23	4.24e-22	yes	up	0.56	32.22	XP_021325145.1(myosin heavy chain, fast skeletal muscle-like [Danio rerio])	gi|13431711|sp|Q90339.2|MYSS_CYPCA(RecName: Full=Myosin heavy chain, fast skeletal muscle)
TRINITY_DN42850_c1_g1	-3.1829	1.66e-23	4.31e-22	yes	down	3.25	0.28	XP_016339356.1(PREDICTED: collagen alpha-1(XXVIII) chain-like isoform X1 [Sinocyclocheilus anshuiensis])	gi|123789585|sp|Q2UY11.1|COSA1_MOUSE(RecName: Full=Collagen alpha-1(XXVIII) chain; Flags: Precursor)
TRINITY_DN46790_c3_g2	-2.20227	1.69e-23	4.37e-22	yes	down	37.61	9.01	None	None
TRINITY_DN20902_c0_g1	-4.7171	1.96e-23	5.05e-22	yes	down	114.73	4.43	None	None
TRINITY_DN33770_c0_g2	7.47029	2.06e-23	5.31e-22	yes	up	0	12.31	None	None
TRINITY_DN26459_c3_g1	-1.25608	2.07e-23	5.32e-22	yes	down	261.9	132.48	None	None
TRINITY_DN21192_c5_g1	-7.80317	2.3e-23	5.91e-22	yes	down	1.72	0	BAB83841.1(ReO_6 [Oryzias latipes])	gi|74825508|sp|Q9NBX4.1|RTXE_DROME(RecName: Full=Probable RNA-directed DNA polymerase from transposon X-element; AltName: Full=Reverse transcriptase)
TRINITY_DN47568_c3_g1	1.19666	2.31e-23	5.92e-22	yes	up	9.37	22.5	XP_016141028.1(PREDICTED: testican-2-like [Sinocyclocheilus grahami])	gi|24212500|sp|Q92563.1|TICN2_HUMAN(RecName: Full=Testican-2; AltName: Full=SPARC/osteonectin, CWCV, and Kazal-like domains proteoglycan 2; Flags: Precursor)
TRINITY_DN30938_c2_g2	-1.76651	2.37e-23	6.07e-22	yes	down	19.96	7.38	None	None
TRINITY_DN21337_c1_g2	4.44609	2.85e-23	7.29e-22	yes	up	0.12	2.8	NP_956152.1(LIM domain binding 3 [Danio rerio])	gi|83288256|sp|O75112.2|LDB3_HUMAN(RecName: Full=LIM domain-binding protein 3; AltName: Full=Protein cypher; AltName: Full=Z-band alternatively spliced PDZ-motif protein)
TRINITY_DN47734_c0_g1	-3.6028	3.05e-23	7.78e-22	yes	down	1.18	0.1	XP_019203002.1(PREDICTED: uncharacterized protein LOC109195424 [Oreochromis niloticus])	gi|130407|sp|P10394.1|POL4_DROME(RecName: Full=Retrovirus-related Pol polyprotein from transposon 412; Includes: RecName: Full=Protease; Includes: RecName: Full=Reverse transcriptase; Includes: RecName: Full=Endonuclease)
TRINITY_DN34623_c1_g1	2.18575	3.9e-23	9.93e-22	yes	up	2.21	8.96	XP_022520786.1(uncharacterized protein LOC111191047 isoform X3 [Astyanax mexicanus])	None
TRINITY_DN41442_c1_g1	3.10222	4.02e-23	1.02e-21	yes	up	1.88	8.79	XP_016306211.1(PREDICTED: uncharacterized protein LOC107661227 [Sinocyclocheilus anshuiensis])	None
TRINITY_DN26668_c0_g1	4.80616	4.07e-23	1.03e-21	yes	up	0.09	2.73	XP_016149341.1(PREDICTED: titin-like [Sinocyclocheilus grahami])	gi|384872704|sp|Q8WZ42.4|TITIN_HUMAN(RecName: Full=Titin; AltName: Full=Connectin; AltName: Full=Rhabdomyosarcoma antigen MU-RMS-40.14)
TRINITY_DN34252_c0_g1	-2.53543	4.52e-23	1.15e-21	yes	down	4.95	0.99	None	None
TRINITY_DN21416_c1_g1	1.72045	4.76e-23	1.21e-21	yes	up	1.93	6.67	XP_018968428.1(PREDICTED: collagen alpha-1(II) chain-like [Cyprinus carpio])	gi|115286|sp|P02460.1|CO2A1_CHICK(RecName: Full=Collagen alpha-1(II) chain; AltName: Full=Alpha-1 type II collagen; Flags: Precursor)
TRINITY_DN26290_c0_g2	4.43227	4.93e-23	1.25e-21	yes	up	1.04	23.45	None	None
TRINITY_DN42752_c3_g2	-3.0942	5.16e-23	1.31e-21	yes	down	56.04	6.45	None	None
TRINITY_DN45745_c1_g2	1.576	5.33e-23	1.35e-21	yes	up	3.42	7.62	XP_016313320.1(PREDICTED: attractin-like protein 1 [Sinocyclocheilus anshuiensis])	gi|189081675|sp|Q5VV63.2|ATRN1_HUMAN(RecName: Full=Attractin-like protein 1; Flags: Precursor)
TRINITY_DN18637_c0_g1	-1.51243	5.46e-23	1.38e-21	yes	down	221.31	93.91	None	None
TRINITY_DN36307_c0_g3	-7.77111	6.01e-23	1.51e-21	yes	down	2.77	0	None	None
TRINITY_DN43755_c0_g1	-2.48927	6.15e-23	1.55e-21	yes	down	37.71	15.53	None	None
TRINITY_DN41850_c1_g2	1.08681	6.36e-23	1.6e-21	yes	up	28	56.61	None	None
TRINITY_DN29936_c1_g2	-7.769	6.4e-23	1.61e-21	yes	down	7.37	0	None	None
TRINITY_DN47999_c0_g1	-2.27676	6.89e-23	1.73e-21	yes	down	10.7	5.62	None	None
TRINITY_DN21569_c4_g1	-4.39971	7.17e-23	1.8e-21	yes	down	3.89	0.1	XP_013877416.1(PREDICTED: RNA-directed DNA polymerase from mobile element jockey-like [Austrofundulus limnaeus])	None
TRINITY_DN47694_c0_g2	-7.76429	7.35e-23	1.84e-21	yes	down	19.06	0	XP_022526691.1(uncharacterized protein LOC111192744 [Astyanax mexicanus])	None
TRINITY_DN33430_c0_g2	-1.74223	9.69e-23	2.42e-21	yes	down	45.39	16.07	None	None
TRINITY_DN31976_c1_g2	-1.09023	9.77e-23	2.44e-21	yes	down	79.5	104.5	XP_016097726.1(PREDICTED: splicing factor, proline- and glutamine-rich-like [Sinocyclocheilus grahami])	None
TRINITY_DN48974_c10_g1	-1.02294	1.06e-22	2.65e-21	yes	down	11.91	3.98	AAM34208.1(polyprotein [Danio rerio])	gi|408360013|sp|Q8R5F3.2|OARD1_MOUSE(RecName: Full=O-acetyl-ADP-ribose deacetylase 1)
TRINITY_DN26654_c1_g6	3.081	1.13e-22	2.82e-21	yes	up	0.17	1.49	XP_019218710.1(PREDICTED: uncharacterized protein LOC109203576 [Oreochromis niloticus])	gi|130407|sp|P10394.1|POL4_DROME(RecName: Full=Retrovirus-related Pol polyprotein from transposon 412; Includes: RecName: Full=Protease; Includes: RecName: Full=Reverse transcriptase; Includes: RecName: Full=Endonuclease)
TRINITY_DN43751_c0_g2	-1.23298	1.13e-22	2.82e-21	yes	down	15.92	7.87	None	None
TRINITY_DN25911_c1_g1	-2.85609	1.34e-22	3.32e-21	yes	down	1.7	0.19	XP_018964140.1(PREDICTED: uncharacterized protein LOC109094915 [Cyprinus carpio])	gi|146291076|sp|Q7LHG5.2|YI31B_YEAST(RecName: Full=Transposon Ty3-I Gag-Pol polyprotein; AltName: Full=Gag3-Pol3; AltName: Full=Transposon Ty3-2 TYA-TYB polyprotein; Contains: RecName: Full=Capsid protein; Short=CA; AltName: Full=p24; Contains: RecName: Full=Spacer peptide p3; Contains: RecName: Full=Nucleocapsid protein p11; Short=NC; Contains: RecName: Full=Ty3 protease; Short=PR; AltName: Full…
TRINITY_DN22028_c5_g3	-4.38284	1.38e-22	3.43e-21	yes	down	13.7	0.69	None	None
TRINITY_DN48418_c2_g2	1.81243	1.46e-22	3.62e-21	yes	up	0.81	2.97	XP_021325919.1(LOW QUALITY PROTEIN: SCO-spondin [Danio rerio])	gi|110287971|sp|Q2PC93.1|SSPO_CHICK(RecName: Full=SCO-spondin; Flags: Precursor)
TRINITY_DN18955_c1_g1	-3.0699	1.68e-22	4.14e-21	yes	down	27.89	2.77	None	None
TRINITY_DN45563_c1_g1	-1.4339	1.87e-22	4.59e-21	yes	down	5.58	2.2	None	None
TRINITY_DN48161_c1_g1	1.60541	1.89e-22	4.63e-21	yes	up	3.23	3.09	XP_024661871.1(uncharacterized protein K02A2.6-like [Maylandia zebra])	gi|558446103|sp|P0CT41.1|TF212_SCHPO(RecName: Full=Transposon Tf2-12 polyprotein; AltName: Full=Retrotransposable element Tf2 155 kDa protein >gi|558446110|sp|P0CT36.1|TF23_SCHPO RecName: Full=Transposon Tf2-3 polyprotein; AltName: Full=Retrotransposable element Tf2 155 kDa protein >gi|558446114|sp|P0CT38.1|TF25_SCHPO RecName: Full=Transposon Tf2-5 polyprotein; AltName: Full=Retrotransposable ele…
TRINITY_DN28648_c3_g2	2.0769	2.15e-22	5.26e-21	yes	up	22.14	82.82	None	None
TRINITY_DN18418_c0_g1	-2.6762	2.18e-22	5.34e-21	yes	down	12.28	2.27	XP_018939225.1(PREDICTED: thyrotropin subunit beta-like [Cyprinus carpio])	gi|586131|sp|Q08127.1|TSHB_ANGAN(RecName: Full=Thyrotropin subunit beta; AltName: Full=Thyroid-stimulating hormone subunit beta; Short=TSH-B; Short=TSH-beta; AltName: Full=Thyrotropin beta chain; Flags: Precursor [Anguilla anguilla])
TRINITY_DN18850_c0_g1	-4.60144	2.33e-22	5.69e-21	yes	down	10.79	0.67	None	None
TRINITY_DN22963_c1_g2	6.30454	2.41e-22	5.88e-21	yes	up	2.57	35.88	None	None
TRINITY_DN24551_c0_g2	4.39112	2.43e-22	5.93e-21	yes	up	0.11	2.57	ARO85815.1(MHC class I antigen [Ctenopharyngodon idella])	gi|231429|sp|P30501.1|1C02_HUMAN(RecName: Full=HLA class I histocompatibility antigen, Cw-2 alpha chain; AltName: Full=MHC class I antigen Cw*2; Flags: Precursor)
TRINITY_DN26700_c5_g1	-2.10834	2.46e-22	6e-21	yes	down	47.69	14.48	None	None
TRINITY_DN34264_c0_g1	-1.9363	2.66e-22	6.48e-21	yes	down	5.9	2.57	XP_023665577.1(uncharacterized protein K02A2.6-like [Paramormyrops kingsleyae])	gi|558446106|sp|P0CT34.1|TF21_SCHPO(RecName: Full=Transposon Tf2-1 polyprotein; AltName: Full=Retrotransposable element Tf2 155 kDa protein >gi|558446108|sp|P0CT35.1|TF22_SCHPO RecName: Full=Transposon Tf2-2 polyprotein; AltName: Full=Retrotransposable element Tf2 155 kDa protein >gi|558446112|sp|P0CT37.1|TF24_SCHPO RecName: Full=Transposon Tf2-4 polyprotein; AltName: Full=Retrotransposable eleme…
TRINITY_DN26758_c1_g1	-3.01582	2.99e-22	7.26e-21	yes	down	28.08	6.79	None	None
TRINITY_DN33994_c1_g1	2.6951	3.23e-22	7.85e-21	yes	up	1.1	8.32	XP_018927908.1(PREDICTED: calphotin-like [Cyprinus carpio])	None
TRINITY_DN43070_c1_g2	-3.66445	3.47e-22	8.42e-21	yes	down	2.06	0.09	KKF20321.1(putative RNA-directed DNA polymerase from transposon X-element [Larimichthys crocea])	gi|134082|sp|P21329.1|RTJK_DROFU(RecName: Full=RNA-directed DNA polymerase from mobile element jockey; AltName: Full=Reverse transcriptase)
TRINITY_DN45648_c2_g1	-1.47202	3.82e-22	9.25e-21	yes	down	28.46	15.71	None	None
TRINITY_DN34648_c2_g1	-1.01074	3.92e-22	9.48e-21	yes	down	10.21	5.82	XP_024655171.1(uncharacterized protein LOC112430892 [Maylandia zebra])	None
TRINITY_DN44182_c0_g2	1.5956	3.98e-22	9.62e-21	yes	up	2.68	11.57	XP_016411386.1(PREDICTED: cartilage matrix protein-like [Sinocyclocheilus rhinocerous])	gi|115555|sp|P05099.2|MATN1_CHICK(RecName: Full=Cartilage matrix protein; AltName: Full=Matrilin-1; Flags: Precursor)
TRINITY_DN17480_c0_g1	-7.70477	4.15e-22	1e-20	yes	down	9.4	0	None	None
TRINITY_DN47821_c4_g1	-1.16299	4.99e-22	1.2e-20	yes	down	10.82	4.3	XP_016367434.1(PREDICTED: activating signal cointegrator 1 complex subunit 2-like [Sinocyclocheilus rhinocerous])	gi|92090990|sp|Q9H1I8.3|ASCC2_HUMAN(RecName: Full=Activating signal cointegrator 1 complex subunit 2; AltName: Full=ASC-1 complex subunit p100; AltName: Full=Trip4 complex subunit p100)
TRINITY_DN26026_c0_g1	-4.34849	5.17e-22	1.24e-20	yes	down	91.72	4.09	None	None
TRINITY_DN25331_c0_g1	-2.2851	5.28e-22	1.27e-20	yes	down	10.98	11.07	None	None
TRINITY_DN39025_c0_g5	-1.20326	5.47e-22	1.31e-20	yes	down	35.72	24.32	None	None
TRINITY_DN27819_c3_g1	-2.16373	5.52e-22	1.32e-20	yes	down	4.9	1.46	None	None
TRINITY_DN33908_c1_g1	-1.51402	5.52e-22	1.32e-20	yes	down	127.3	68.07	None	None
TRINITY_DN31762_c1_g1	-2.10224	5.76e-22	1.38e-20	yes	down	60.97	15.01	None	None
TRINITY_DN38982_c0_g3	1.91009	6.04e-22	1.44e-20	yes	up	1.78	1.44	XP_009302985.2(uncharacterized protein LOC103911649 [Danio rerio])	gi|338819284|sp|O92815.2|POL_WDSV(RecName: Full=Gag-Pol polyprotein; Contains: RecName: Full=Matrix protein p10; Short=MA; Contains: RecName: Full=p20; Contains: RecName: Full=Capsid protein p25; Short=CA; Contains: RecName: Full=Nucleocapsid protein p14; Short=NC-pol; Contains: RecName: Full=Protease p15; Short=PR; Contains: RecName: Full=Reverse transcriptase/ribonuclease H p90; Short=RT; Conta…
TRINITY_DN46753_c3_g1	-1.50658	6.47e-22	1.54e-20	yes	down	4.46	0.83	XP_016376795.1(PREDICTED: Bloom syndrome protein homolog isoform X1 [Sinocyclocheilus rhinocerous])	gi|17366056|sp|Q9DEY9.1|BLM_XENLA(RecName: Full=Bloom syndrome protein homolog; Short=xBLM; AltName: Full=RecQ helicase homolog)
TRINITY_DN31465_c1_g1	-1.70372	6.72e-22	1.6e-20	yes	down	267.55	48.53	None	None
TRINITY_DN25117_c1_g3	-7.68769	6.76e-22	1.6e-20	yes	down	26.15	0	None	None
TRINITY_DN28369_c1_g2	-2.32596	6.98e-22	1.66e-20	yes	down	12.8	2.72	None	None
TRINITY_DN36347_c0_g1	1.33067	7.07e-22	1.68e-20	yes	up	8.76	25.39	XP_019129054.1(PREDICTED: uncharacterized protein LOC109141790, partial [Larimichthys crocea])	None
TRINITY_DN45286_c0_g1	1.78916	7.31e-22	1.73e-20	yes	up	4.87	17.64	None	None
TRINITY_DN46862_c1_g1	-1.73595	7.38e-22	1.75e-20	yes	down	17.67	5.56	None	None
TRINITY_DN31941_c0_g3	-2.01279	7.62e-22	1.8e-20	yes	down	1.84	0.48	XP_019214950.1(PREDICTED: uncharacterized protein LOC102078378 isoform X1 [Oreochromis niloticus])	gi|74821373|sp|Q95SX7.1|RTBS_DROME(RecName: Full=Probable RNA-directed DNA polymerase from transposon BS; AltName: Full=Reverse transcriptase)
TRINITY_DN30782_c0_g2	-2.69068	7.72e-22	1.82e-20	yes	down	6.51	1.24	None	None
TRINITY_DN20681_c1_g1	-3.17242	7.74e-22	1.83e-20	yes	down	30.55	1.38	None	None
TRINITY_DN19689_c2_g3	-4.99582	7.85e-22	1.85e-20	yes	down	1.84	0.06	XP_008436440.2(PREDICTED: uncharacterized protein LOC103482201 [Poecilia reticulata])	gi|136140|sp|P03010.1|TRAC9_MAIZE(RecName: Full=Putative AC9 transposase)
TRINITY_DN33748_c1_g1	1.39587	7.97e-22	1.88e-20	yes	up	1.35	3.42	XP_018930702.1(PREDICTED: LOW QUALITY PROTEIN: desmoglein-3-like [Cyprinus carpio])	gi|148876773|sp|Q14126.2|DSG2_HUMAN(RecName: Full=Desmoglein-2; AltName: Full=Cadherin family member 5; AltName: Full=HDGC; Flags: Precursor)
TRINITY_DN41334_c1_g1	-3.52804	8.01e-22	1.89e-20	yes	down	6.36	0.21	XP_017269695.1(PREDICTED: general transcription factor II-I repeat domain-containing protein 2-like [Kryptolebias marmoratus])	gi|74709247|sp|Q6EKJ0.1|GTD2B_HUMAN(RecName: Full=General transcription factor II-I repeat domain-containing protein 2B; Short=GTF2I repeat domain-containing protein 2B; AltName: Full=Transcription factor GTF2IRD2-beta)
TRINITY_DN20327_c0_g2	-4.61568	8.75e-22	2.06e-20	yes	down	85.54	3.95	None	None
TRINITY_DN32193_c0_g3	3.41734	9.1e-22	2.14e-20	yes	up	0.22	2.41	XP_016368572.1(PREDICTED: RNA-directed DNA polymerase from mobile element jockey-like [Sinocyclocheilus rhinocerous])	gi|134083|sp|P21328.1|RTJK_DROME(RecName: Full=RNA-directed DNA polymerase from mobile element jockey; AltName: Full=Reverse transcriptase)
TRINITY_DN25365_c0_g3	-3.42091	9.42e-22	2.21e-20	yes	down	1.36	0.13	XP_016429050.1(PREDICTED: relaxin receptor 1-like [Sinocyclocheilus rhinocerous])	gi|81864127|sp|Q6R6I7.1|RXFP1_MOUSE(RecName: Full=Relaxin receptor 1; AltName: Full=Leucine-rich repeat-containing G-protein coupled receptor 7; AltName: Full=Relaxin family peptide receptor 1)
TRINITY_DN21003_c0_g1	-3.03225	9.96e-22	2.33e-20	yes	down	31.04	3.66	None	None
TRINITY_DN29666_c0_g1	3.19939	1.24e-21	2.9e-20	yes	up	5.85	35.37	None	None
TRINITY_DN49048_c5_g1	-1.65247	1.61e-21	3.74e-20	yes	down	17.52	5.84	XP_019201078.1(PREDICTED: uncharacterized protein LOC106097162 [Oreochromis niloticus])	gi|130407|sp|P10394.1|POL4_DROME(RecName: Full=Retrovirus-related Pol polyprotein from transposon 412; Includes: RecName: Full=Protease; Includes: RecName: Full=Reverse transcriptase; Includes: RecName: Full=Endonuclease)
TRINITY_DN25856_c1_g2	1.85293	1.61e-21	3.74e-20	yes	up	9.41	36.89	None	None
TRINITY_DN35206_c1_g1	1.32879	1.77e-21	4.11e-20	yes	up	1.52	9.2	XP_013872245.1(PREDICTED: uncharacterized protein LOC106523394, partial [Austrofundulus limnaeus])	gi|130405|sp|P04323.1|POL3_DROME(RecName: Full=Retrovirus-related Pol polyprotein from transposon 17.6; Includes: RecName: Full=Protease; Includes: RecName: Full=Reverse transcriptase; Includes: RecName: Full=Endonuclease)
TRINITY_DN21790_c2_g3	-7.65293	1.79e-21	4.16e-20	yes	down	2.49	0	XP_016371920.1(PREDICTED: CD276 antigen homolog [Sinocyclocheilus rhinocerous])	gi|81915192|sp|Q8VE98.1|CD276_MOUSE(RecName: Full=CD276 antigen; AltName: Full=B7 homolog 3; Short=B7-H3; AltName: Full=Costimulatory molecule; AltName: CD_antigen=CD276; Flags: Precursor)
TRINITY_DN25320_c3_g5	-7.65222	1.83e-21	4.24e-20	yes	down	34.57	0	None	None
TRINITY_DN27355_c1_g1	2.70893	1.99e-21	4.6e-20	yes	up	4.47	29.48	None	None
TRINITY_DN36809_c0_g2	1.79814	2.02e-21	4.66e-20	yes	up	1.48	4.63	XP_018969521.1(PREDICTED: calpain-2 catalytic subunit-like [Cyprinus carpio])	gi|33112235|sp|Q9GLG1.3|CAN2_MACFA(RecName: Full=Calpain-2 catalytic subunit; AltName: Full=Calcium-activated neutral proteinase 2; Short=CANP 2; AltName: Full=Calpain M-type; AltName: Full=Calpain-2 large subunit; AltName: Full=Millimolar-calpain; Short=M-calpain; Flags: Precursor)
TRINITY_DN37819_c0_g1	1.50729	2.18e-21	5.02e-20	yes	up	3.12	17.18	XP_018977140.1(PREDICTED: putative protein TPRXL [Cyprinus carpio])	None
TRINITY_DN22042_c1_g1	-2.62928	2.43e-21	5.58e-20	yes	down	1.4	0.24	XP_023183237.1(uncharacterized protein LOC111606583 [Xiphophorus maculatus])	gi|130407|sp|P10394.1|POL4_DROME(RecName: Full=Retrovirus-related Pol polyprotein from transposon 412; Includes: RecName: Full=Protease; Includes: RecName: Full=Reverse transcriptase; Includes: RecName: Full=Endonuclease)
TRINITY_DN45550_c0_g2	-1.42968	2.44e-21	5.61e-20	yes	down	9.63	4.05	KTF95007.1(hypothetical protein cypCar_00010640, partial [Cyprinus carpio])	gi|82179961|sp|Q5U3U7.1|NLS1A_DANRE(RecName: Full=Sodium-dependent lysophosphatidylcholine symporter 1-A; Short=NLS1-A; Short=Sodium-dependent LPC symporter 1-A; AltName: Full=Major facilitator superfamily domain-containing protein 2A-A)
TRINITY_DN35749_c0_g2	-2.43288	2.45e-21	5.62e-20	yes	down	9.73	1.63	XP_016343746.1(PREDICTED: Ig heavy chain Mem5-like [Sinocyclocheilus anshuiensis])	gi|123944|sp|P15814.1|IGLL1_HUMAN(RecName: Full=Immunoglobulin lambda-like polypeptide 1; AltName: Full=CD179 antigen-like family member B; AltName: Full=Ig lambda-5; AltName: Full=Immunoglobulin omega polypeptide; AltName: Full=Immunoglobulin-related protein 14.1; AltName: CD_antigen=CD179b; Flags: Precursor)
TRINITY_DN31838_c0_g1	-3.49701	2.95e-21	6.77e-20	yes	down	10.7	2.13	None	None
TRINITY_DN47575_c0_g1	-1.11935	3.27e-21	7.48e-20	yes	down	2.17	1.05	XP_023815816.1(uncharacterized protein LOC111948209, partial [Oryzias latipes])	gi|130407|sp|P10394.1|POL4_DROME(RecName: Full=Retrovirus-related Pol polyprotein from transposon 412; Includes: RecName: Full=Protease; Includes: RecName: Full=Reverse transcriptase; Includes: RecName: Full=Endonuclease)
TRINITY_DN22719_c2_g2	-1.19313	3.65e-21	8.33e-20	yes	down	95.94	75.95	None	None
TRINITY_DN17169_c0_g1	-5.50483	3.9e-21	8.87e-20	yes	down	1.36	0.03	XP_017214539.1(uncharacterized protein LOC100005318 [Danio rerio])	None
TRINITY_DN31202_c1_g1	-7.6173	4.79e-21	1.09e-19	yes	down	27.66	0	None	None
TRINITY_DN32085_c0_g2	-1.60136	4.81e-21	1.09e-19	yes	down	5.22	1.5	XP_001338892.3(uncharacterized protein si:ch73-30l9.1 [Danio rerio])	None
TRINITY_DN32826_c0_g1	-3.06091	5.08e-21	1.15e-19	yes	down	1.13	0.23	XP_016392820.1(PREDICTED: uncharacterized protein LOC107727458 [Sinocyclocheilus rhinocerous])	gi|141475|sp|P14381.1|YTX2_XENLA(RecName: Full=Transposon TX1 uncharacterized 149 kDa protein; AltName: Full=ORF 2)
TRINITY_DN37981_c0_g2	-1.76034	5.69e-21	1.29e-19	yes	down	9.24	9.43	XP_023192322.1(uncharacterized protein LOC111609249 isoform X2 [Xiphophorus maculatus])	None
TRINITY_DN47928_c1_g2	1.61685	5.97e-21	1.35e-19	yes	up	1.24	3.99	NP_001018464.1(glycogen phosphorylase, muscle form [Danio rerio])	gi|3041717|sp|P11217.6|PYGM_HUMAN(RecName: Full=Glycogen phosphorylase, muscle form; AltName: Full=Myophosphorylase)
TRINITY_DN23189_c3_g1	-3.59403	6.34e-21	1.43e-19	yes	down	12.76	0.82	None	None
TRINITY_DN33207_c1_g1	3.8201	6.44e-21	1.45e-19	yes	up	0.12	7.06	XP_018918737.1(PREDICTED: troponin I, slow skeletal muscle-like [Cyprinus carpio])	gi|136221|sp|P02645.1|TNNI1_RABIT(RecName: Full=Troponin I, slow skeletal muscle; AltName: Full=Troponin I, slow-twitch isoform)
TRINITY_DN22002_c3_g1	1.12082	7.53e-21	1.7e-19	yes	up	53.72	88.76	None	None
TRINITY_DN34130_c1_g2	-2.60644	7.58e-21	1.7e-19	yes	down	43.71	9.72	None	None
TRINITY_DN21772_c0_g1	-7.59916	7.84e-21	1.76e-19	yes	down	3.57	0	XP_018954409.1(PREDICTED: P2X purinoceptor 7-like [Cyprinus carpio])	gi|395398617|sp|Q99572.4|P2RX7_HUMAN(RecName: Full=P2X purinoceptor 7; Short=P2X7; AltName: Full=ATP receptor; AltName: Full=P2Z receptor; AltName: Full=Purinergic receptor)
TRINITY_DN48464_c2_g1	-2.92614	8.52e-21	1.91e-19	yes	down	42.3	4.56	None	None
TRINITY_DN38756_c0_g9	1.31343	9.3e-21	2.08e-19	yes	up	2.4	6.24	XP_016343587.1(PREDICTED: collagen alpha-1(I) chain-like [Sinocyclocheilus anshuiensis])	gi|82175621|sp|Q9YIB4.1|CO1A1_CYNPY(RecName: Full=Collagen alpha-1(I) chain; AltName: Full=Alpha-1 type I collagen; Flags: Precursor)
TRINITY_DN22241_c0_g3	1.8647	1.09e-20	2.45e-19	yes	up	14.06	34.3	XP_018980748.1(PREDICTED: C-C motif chemokine 4 homolog isoform X1 [Cyprinus carpio])	gi|60389480|sp|Q5I1Z0.1|CCL3_PANTR(RecName: Full=C-C motif chemokine 3; AltName: Full=Macrophage inflammatory protein 1-alpha; Short=MIP-1-alpha; AltName: Full=Small-inducible cytokine A3; Flags: Precursor)
TRINITY_DN32013_c0_g1	-1.64014	1.1e-20	2.47e-19	yes	down	78.06	28.21	None	None
TRINITY_DN37036_c0_g3	-5.4715	1.12e-20	2.5e-19	yes	down	21.98	0.76	None	None
TRINITY_DN43140_c2_g1	1.37567	1.15e-20	2.57e-19	yes	up	8.03	13.51	None	None
TRINITY_DN34590_c0_g1	-6.4852	1.22e-20	2.7e-19	yes	down	8.37	0.11	None	None
TRINITY_DN24804_c0_g4	-3.35951	1.26e-20	2.8e-19	yes	down	12.04	0.96	NP_919384.1(major histocompatibility complex class I UFA precursor [Danio rerio])	gi|122152|sp|P15979.1|HA1F_CHICK(RecName: Full=Class I histocompatibility antigen, F10 alpha chain; AltName: Full=B-F histocompatibility F10 antigen; AltName: Full=B-F-beta-IV; AltName: Full=B12; Flags: Precursor)
TRINITY_DN34416_c0_g1	-1.74554	1.5e-20	3.34e-19	yes	down	3.32	1.05	XP_017568066.1(PREDICTED: carboxypeptidase Z [Pygocentrus nattereri])	gi|82135378|sp|Q8QGP3.1|CBPZ_CHICK(RecName: Full=Carboxypeptidase Z; Short=CPZ; Short=cCPZ; Flags: Precursor)
TRINITY_DN26814_c1_g1	-7.56216	2.11e-20	4.66e-19	yes	down	1.52	0	XP_018972467.1(PREDICTED: uncharacterized protein LOC109103518 [Cyprinus carpio])	gi|288558829|sp|Q2TBI2.2|THAP4_BOVIN(RecName: Full=THAP domain-containing protein 4)
TRINITY_DN20806_c0_g1	-6.4653	2.15e-20	4.74e-19	yes	down	1.44	0.02	XP_019132409.1(PREDICTED: uncharacterized protein LOC109142602 [Larimichthys crocea])	gi|130398|sp|P20825.1|POL2_DROME(RecName: Full=Retrovirus-related Pol polyprotein from transposon 297; Includes: RecName: Full=Protease; Includes: RecName: Full=Reverse transcriptase; Includes: RecName: Full=Endonuclease)
TRINITY_DN29297_c0_g2	-4.52419	2.19e-20	4.84e-19	yes	down	21.87	3.56	None	None
TRINITY_DN25044_c1_g1	-1.86272	2.73e-20	5.99e-19	yes	down	38.32	13.16	None	None
TRINITY_DN30244_c0_g2	-3.16479	2.98e-20	6.53e-19	yes	down	3.44	0.23	XP_016387159.1(PREDICTED: uncharacterized protein LOC107723143 [Sinocyclocheilus rhinocerous])	None
TRINITY_DN47190_c2_g1	4.25921	3.07e-20	6.71e-19	yes	up	1.05	11.44	None	None
TRINITY_DN45468_c1_g3	-3.08793	3.21e-20	7.01e-19	yes	down	15.31	1.89	None	None
TRINITY_DN31073_c2_g4	-3.55172	3.39e-20	7.38e-19	yes	down	1.54	0.12	KKF09339.1(RNA-directed DNA polymerase from mobile element jockey [Larimichthys crocea])	gi|134082|sp|P21329.1|RTJK_DROFU(RecName: Full=RNA-directed DNA polymerase from mobile element jockey; AltName: Full=Reverse transcriptase)
TRINITY_DN19805_c0_g2	2.21646	3.4e-20	7.4e-19	yes	up	13.45	58.87	None	None
TRINITY_DN40417_c1_g1	-1.825	3.42e-20	7.44e-19	yes	down	14.41	4.26	None	None
TRINITY_DN38993_c0_g1	-4.01419	3.44e-20	7.48e-19	yes	down	52.49	5.5	None	None
TRINITY_DN47434_c2_g2	1.90626	3.48e-20	7.57e-19	yes	up	1.41	5.56	XP_016373516.1(PREDICTED: collagen alpha-1(XIV) chain-like isoform X1 [Sinocyclocheilus rhinocerous])	gi|292495082|sp|Q923P0.3|COKA1_MOUSE(RecName: Full=Collagen alpha-1(XX) chain; Flags: Precursor)
TRINITY_DN48982_c3_g1	-1.88034	4.26e-20	9.23e-19	yes	down	23.56	9.57	None	None
TRINITY_DN32087_c2_g1	-3.3278	4.6e-20	9.95e-19	yes	down	13.64	1.13	XP_018957775.1(PREDICTED: uncharacterized protein LOC109088059 [Cyprinus carpio])	None
TRINITY_DN35335_c0_g1	-1.17762	4.67e-20	1.01e-18	yes	down	9.77	8.37	XP_018944069.1(PREDICTED: uncharacterized protein LOC109072261 [Cyprinus carpio])	None
TRINITY_DN22865_c2_g1	-7.5311	4.76e-20	1.03e-18	yes	down	7.76	0	None	None
TRINITY_DN25730_c0_g6	-3.14881	5.28e-20	1.14e-18	yes	down	103.07	11.76	XP_024658470.1(uncharacterized protein LOC112434934, partial [Maylandia zebra])	None
TRINITY_DN35296_c12_g1	1.37034	5.33e-20	1.15e-18	yes	up	79.08	164.05	None	None
TRINITY_DN23061_c0_g2	2.85033	5.6e-20	1.2e-18	yes	up	5.14	13.75	None	None
TRINITY_DN19836_c0_g1	-7.52419	5.7e-20	1.22e-18	yes	down	1.41	0	XP_023674651.1(uncharacterized protein LOC111847572 isoform X1 [Paramormyrops kingsleyae])	gi|341940720|sp|Q5RJY2.2|G2E3_MOUSE(RecName: Full=G2/M phase-specific E3 ubiquitin-protein ligase)
TRINITY_DN25925_c2_g1	-7.52419	5.7e-20	1.22e-18	yes	down	12.34	0	None	None
TRINITY_DN23299_c1_g1	-3.99582	6.66e-20	1.42e-18	yes	down	1.01	0.08	BAC82609.1(pol-like protein [Danio rerio])	gi|141475|sp|P14381.1|YTX2_XENLA(RecName: Full=Transposon TX1 uncharacterized 149 kDa protein; AltName: Full=ORF 2)
TRINITY_DN23653_c1_g2	-6.42466	6.72e-20	1.43e-18	yes	down	22.79	0.19	None	None
TRINITY_DN37050_c0_g2	2.41947	7.02e-20	1.5e-18	yes	up	1.2	5.15	XP_023677116.1(uncharacterized protein LOC111848936 isoform X5 [Paramormyrops kingsleyae])	None
TRINITY_DN27377_c1_g2	1.88969	7.04e-20	1.5e-18	yes	up	13.3	44.34	None	None
TRINITY_DN47434_c2_g1	1.41554	7.52e-20	1.6e-18	yes	up	0.97	3.76	XP_016320587.1(PREDICTED: collagen alpha-1(XX) chain-like isoform X1 [Sinocyclocheilus anshuiensis])	gi|1705533|sp|P32018.2|COEA1_CHICK(RecName: Full=Collagen alpha-1(XIV) chain; AltName: Full=Undulin; Flags: Precursor)
TRINITY_DN24764_c1_g3	-4.20227	1.01e-19	2.15e-18	yes	down	2.42	0.15	XP_015832292.1(PREDICTED: P2X purinoceptor 7-like [Nothobranchius furzeri])	gi|395398617|sp|Q99572.4|P2RX7_HUMAN(RecName: Full=P2X purinoceptor 7; Short=P2X7; AltName: Full=ATP receptor; AltName: Full=P2Z receptor; AltName: Full=Purinergic receptor)
TRINITY_DN30104_c1_g1	3.1934	1.05e-19	2.22e-18	yes	up	1.12	10.73	None	None
TRINITY_DN25995_c0_g1	-1.2006	1.1e-19	2.34e-18	yes	down	82.75	30.19	None	None
TRINITY_DN47320_c3_g1	-1.68584	1.21e-19	2.56e-18	yes	down	13.75	3.63	None	None
TRINITY_DN44249_c0_g1	3.95255	1.22e-19	2.57e-18	yes	up	0.31	4.56	XP_022519072.1(uncharacterized protein LOC111189674 [Astyanax mexicanus])	None
TRINITY_DN18833_c2_g1	-2.01822	1.23e-19	2.59e-18	yes	down	26.24	7.96	None	None
TRINITY_DN43504_c1_g2	-3.51777	1.25e-19	2.64e-18	yes	down	27.16	2.47	None	None
TRINITY_DN23309_c1_g1	-3.9772	1.29e-19	2.72e-18	yes	down	21.14	2.67	XP_016114276.1(PREDICTED: transcription factor Adf-1-like [Sinocyclocheilus grahami])	None
TRINITY_DN40067_c1_g5	-3.39971	1.47e-19	3.08e-18	yes	down	2.93	0.29	None	None
TRINITY_DN27059_c2_g1	-7.4852	1.55e-19	3.25e-18	yes	down	5.44	0	None	None
TRINITY_DN37620_c2_g1	-3.7918	1.63e-19	3.4e-18	yes	down	1.68	0.06	XP_021334418.1(interleukin-1 receptor accessory protein-like 1-A isoform X1 [Danio rerio])	gi|130407|sp|P10394.1|POL4_DROME(RecName: Full=Retrovirus-related Pol polyprotein from transposon 412; Includes: RecName: Full=Protease; Includes: RecName: Full=Reverse transcriptase; Includes: RecName: Full=Endonuclease)
TRINITY_DN26113_c2_g1	-3.29538	1.67e-19	3.5e-18	yes	down	6.01	0.22	KKF24246.1(RNA-directed DNA polymerase from mobile element jockey [Larimichthys crocea])	gi|134083|sp|P21328.1|RTJK_DROME(RecName: Full=RNA-directed DNA polymerase from mobile element jockey; AltName: Full=Reverse transcriptase)
TRINITY_DN32710_c1_g1	-3.29538	1.67e-19	3.5e-18	yes	down	1.03	0.11	XP_021335953.1(low-density lipoprotein receptor-related protein 2 [Danio rerio])	gi|160409939|sp|A2ARV4.1|LRP2_MOUSE(RecName: Full=Low-density lipoprotein receptor-related protein 2; Short=LRP-2; AltName: Full=Glycoprotein 330; Short=gp330; AltName: Full=Megalin; Flags: Precursor)
TRINITY_DN44584_c0_g1	-2.0454	1.73e-19	3.61e-18	yes	down	1.96	0.5	XP_016148480.1(PREDICTED: von Willebrand factor D and EGF domain-containing protein-like [Sinocyclocheilus grahami])	gi|327478608|sp|Q8N2E2.4|VWDE_HUMAN(RecName: Full=von Willebrand factor D and EGF domain-containing protein; Flags: Precursor)
TRINITY_DN46821_c1_g2	2.08477	1.82e-19	3.81e-18	yes	up	5.17	23.47	None	None
TRINITY_DN42076_c0_g1	-3.20227	1.86e-19	3.88e-18	yes	down	6.79	0.77	KTF70954.1(hypothetical protein cypCar_00047141 [Cyprinus carpio])	gi|3023556|sp|Q62267.1|SPR1B_MOUSE(RecName: Full=Cornifin-B; AltName: Full=Small proline-rich protein 1B; Short=SPR1 B; Short=SPR1B)
TRINITY_DN33968_c0_g1	-1.80758	1.95e-19	4.06e-18	yes	down	3.88	1.18	XP_023806938.1(uncharacterized protein K02A2.6-like [Oryzias latipes])	gi|146291076|sp|Q7LHG5.2|YI31B_YEAST(RecName: Full=Transposon Ty3-I Gag-Pol polyprotein; AltName: Full=Gag3-Pol3; AltName: Full=Transposon Ty3-2 TYA-TYB polyprotein; Contains: RecName: Full=Capsid protein; Short=CA; AltName: Full=p24; Contains: RecName: Full=Spacer peptide p3; Contains: RecName: Full=Nucleocapsid protein p11; Short=NC; Contains: RecName: Full=Ty3 protease; Short=PR; AltName: Full…
TRINITY_DN19642_c0_g1	-2.20941	2.05e-19	4.26e-18	yes	down	86	10.15	XP_016306211.1(PREDICTED: uncharacterized protein LOC107661227 [Sinocyclocheilus anshuiensis])	None
TRINITY_DN32689_c1_g1	2.26262	2.25e-19	4.68e-18	yes	up	4.34	13.19	None	None
TRINITY_DN37109_c1_g5	2.08036	2.31e-19	4.79e-18	yes	up	7.27	32.18	None	None
TRINITY_DN27195_c4_g2	-1.83827	2.51e-19	5.18e-18	yes	down	37.24	14.97	None	None
TRINITY_DN18961_c0_g2	7.13575	2.54e-19	5.25e-18	yes	up	0	17.07	XP_017208743.1(myosin heavy chain, fast skeletal muscle [Danio rerio])	gi|13431711|sp|Q90339.2|MYSS_CYPCA(RecName: Full=Myosin heavy chain, fast skeletal muscle)
TRINITY_DN44004_c1_g2	2.07659	2.83e-19	5.83e-18	yes	up	11.87	36.52	XP_016085890.1(PREDICTED: tumor necrosis factor receptor superfamily member 14-like isoform X2 [Sinocyclocheilus grahami])	gi|172046819|sp|P27512.3|TNR5_MOUSE(RecName: Full=Tumor necrosis factor receptor superfamily member 5; AltName: Full=B-cell surface antigen CD40; AltName: Full=Bp50; AltName: Full=CD40L receptor; AltName: CD_antigen=CD40; Flags: Precursor)
TRINITY_DN22499_c0_g1	-7.46129	2.83e-19	5.84e-18	yes	down	103.43	0	None	None
TRINITY_DN49206_c4_g1	-1.85817	2.86e-19	5.9e-18	yes	down	10.39	4.55	None	None
TRINITY_DN28611_c1_g2	7.13089	2.87e-19	5.91e-18	yes	up	0	1.71	XP_015802120.1(PREDICTED: uncharacterized protein LOC107377186 [Nothobranchius furzeri])	None
TRINITY_DN39762_c0_g2	-4.81538	2.96e-19	6.08e-18	yes	down	10.13	0.38	XP_016149581.1(PREDICTED: kinase D-interacting substrate of 220 kDa-like isoform X1 [Sinocyclocheilus grahami])	gi|172045712|sp|Q7T163.2|KDIS_DANRE(RecName: Full=Kinase D-interacting substrate of 220 kDa; AltName: Full=Ankyrin repeat-rich membrane-spanning protein)
TRINITY_DN31819_c4_g1	-5.36147	3.13e-19	6.43e-18	yes	down	7.37	0.19	None	None
TRINITY_DN24970_c0_g1	2.46326	3.13e-19	6.43e-18	yes	up	3.27	22.74	None	None
TRINITY_DN22177_c2_g2	-3.77342	3.14e-19	6.45e-18	yes	down	2.06	0.21	AGO18322.1(reverse transcriptase, partial [Clarias batrachus])	gi|126296|sp|P08548.1|LIN1_NYCCO(RecName: Full=LINE-1 reverse transcriptase homolog)
TRINITY_DN30418_c0_g5	4.54593	3.46e-19	7.06e-18	yes	up	0.05	1.24	CBN81178.1(Pol polyprotein [Dicentrarchus labrax])	gi|172046699|sp|Q86TG7.2|PEG10_HUMAN(RecName: Full=Retrotransposon-derived protein PEG10; AltName: Full=Embryonal carcinoma differentiation-regulated protein; AltName: Full=Mammalian retrotransposon-derived protein 2; AltName: Full=Myelin expression factor 3-like protein 1; Short=MEF3-like protein 1; AltName: Full=Paternally expressed gene 10 protein; AltName: Full=Retrotransposon gag domain-cont…
TRINITY_DN36952_c1_g3	-2.50948	3.63e-19	7.41e-18	yes	down	74.1	12.06	BAE46429.1(ORF2-encoded protein, partial [Danio rerio])	None
TRINITY_DN30837_c1_g1	-4.16327	3.81e-19	7.75e-18	yes	down	3.33	0.2	XP_016117356.1(PREDICTED: NACHT, LRR and PYD domains-containing protein 3-like [Sinocyclocheilus grahami])	gi|28201899|sp|Q91453.3|STXB_SYNHO(RecName: Full=Stonustoxin subunit beta; Short=SNTX subunit beta)
TRINITY_DN43668_c1_g1	-4.16327	3.81e-19	7.75e-18	yes	down	1.88	0.11	None	None
TRINITY_DN20055_c1_g1	-1.23995	3.84e-19	7.8e-18	yes	down	108.97	51.67	None	None
TRINITY_DN42668_c0_g1	-3.94461	4.02e-19	8.18e-18	yes	down	16	0.89	None	None
TRINITY_DN31350_c1_g1	-2.01298	4.03e-19	8.18e-18	yes	down	10.14	2.83	None	None
TRINITY_DN28707_c0_g3	-2.73395	4.04e-19	8.2e-18	yes	down	7.44	1.17	XP_024147653.1(splicing factor 3B subunit 6 [Oryzias melastigma])	gi|12585536|sp|Q9Y3B4.1|SF3B6_HUMAN(RecName: Full=Splicing factor 3B subunit 6; AltName: Full=Pre-mRNA branch site protein p14; AltName: Full=SF3b 14 kDa subunit; Short=SF3B14a; AltName: Full=Spliceosome-associated protein, 14-kDa; AltName: Full=Splicing factor 3b, subunit 6, 14kDa >gi|31563064|sp|P59708.1|SF3B6_MOUSE RecName: Full=Splicing factor 3B subunit 6; AltName: Full=Pre-mRNA branch site …
TRINITY_DN32995_c1_g2	1.51417	4.11e-19	8.33e-18	yes	up	30.11	31.08	None	None
TRINITY_DN20252_c2_g1	-2.45292	4.15e-19	8.41e-18	yes	down	2.57	0.49	XP_015828284.1(PREDICTED: zinc finger BED domain-containing protein 1-like [Nothobranchius furzeri])	gi|41018380|sp|O96006.1|ZBED1_HUMAN(RecName: Full=Zinc finger BED domain-containing protein 1; AltName: Full=Putative Ac-like transposable element; AltName: Full=dREF homolog)
TRINITY_DN45392_c3_g2	-7.44512	4.24e-19	8.58e-18	yes	down	5.79	0	None	None
TRINITY_DN18916_c0_g3	-5.35044	4.31e-19	8.72e-18	yes	down	9.72	1.66	None	None
TRINITY_DN30752_c0_g1	2.97179	5.05e-19	1.02e-17	yes	up	2.49	22.77	XP_022608465.1(myosin heavy chain, fast skeletal muscle-like isoform X1 [Seriola dumerili])	gi|13431711|sp|Q90339.2|MYSS_CYPCA(RecName: Full=Myosin heavy chain, fast skeletal muscle)
TRINITY_DN32958_c0_g2	1.74489	6.11e-19	1.23e-17	yes	up	1.44	4.55	NP_001136038.1(solute carrier family 13, member 5 [Danio rerio])	gi|74714197|sp|Q86YT5.1|S13A5_HUMAN(RecName: Full=Solute carrier family 13 member 5; AltName: Full=Na(+)/citrate cotransporter; Short=NaCT; AltName: Full=Sodium-coupled citrate transporter; AltName: Full=Sodium-dependent citrate transporter)
TRINITY_DN42248_c0_g1	1.31148	6.17e-19	1.24e-17	yes	up	4.55	11.85	XP_016094849.1(PREDICTED: bifunctional purine biosynthesis protein PURH-like [Sinocyclocheilus grahami])	gi|400901|sp|P31335.1|PUR9_CHICK(RecName: Full=Bifunctional purine biosynthesis protein PURH; Includes: RecName: Full=Phosphoribosylaminoimidazolecarboxamide formyltransferase; AltName: Full=5-aminoimidazole-4-carboxamide ribonucleotide formyltransferase; AltName: Full=AICAR transformylase; Includes: RecName: Full=IMP cyclohydrolase; AltName: Full=ATIC; AltName: Full=IMP synthase; AltName: Full=I…
TRINITY_DN31572_c1_g1	-1.87141	6.68e-19	1.34e-17	yes	down	12.15	3.59	KTG38041.1(hypothetical protein cypCar_00044418 [Cyprinus carpio])	None
TRINITY_DN42126_c0_g1	-1.79788	6.75e-19	1.35e-17	yes	down	7.21	1.91	XP_016117594.1(PREDICTED: actin-like protein 6B [Sinocyclocheilus grahami])	gi|23396462|sp|O94805.1|ACL6B_HUMAN(RecName: Full=Actin-like protein 6B; AltName: Full=53 kDa BRG1-associated factor B; AltName: Full=Actin-related protein Baf53b; AltName: Full=ArpNalpha; AltName: Full=BRG1-associated factor 53B; Short=BAF53B)
TRINITY_DN19829_c2_g6	7.09694	6.79e-19	1.36e-17	yes	up	0	1.37	XP_016350030.1(PREDICTED: NACHT, LRR and PYD domains-containing protein 3-like [Sinocyclocheilus anshuiensis])	gi|158563940|sp|Q7RTR2.2|NLRC3_HUMAN(RecName: Full=Protein NLRC3; AltName: Full=CARD15-like protein; AltName: Full=Caterpiller protein 16.2; Short=CLR16.2; AltName: Full=Nucleotide-binding oligomerization domain protein 3)
TRINITY_DN34519_c1_g1	-7.42466	7.03e-19	1.4e-17	yes	down	5.06	0	KTF92489.1(hypothetical protein cypCar_00049226, partial [Cyprinus carpio])	None
TRINITY_DN20463_c2_g1	-3.59916	7.45e-19	1.49e-17	yes	down	1.4	0.12	XP_020786317.1(uncharacterized protein LOC110165462 [Boleophthalmus pectinirostris])	None
TRINITY_DN21288_c2_g1	-3.59916	7.45e-19	1.49e-17	yes	down	1.75	2.42	XP_016386982.1(PREDICTED: chromaffin granule amine transporter-like [Sinocyclocheilus rhinocerous])	gi|1722741|sp|P54219.1|VMAT1_HUMAN(RecName: Full=Chromaffin granule amine transporter; AltName: Full=Solute carrier family 18 member 1; AltName: Full=Vesicular amine transporter 1; Short=VAT1)
TRINITY_DN26013_c1_g2	-1.31784	8.07e-19	1.61e-17	yes	down	34.42	14.26	None	None
TRINITY_DN27204_c2_g2	-1.50162	8.12e-19	1.62e-17	yes	down	196.03	135.3	None	None
TRINITY_DN31147_c2_g1	3.24894	8.59e-19	1.71e-17	yes	up	0.47	5.11	XP_018919884.1(PREDICTED: mast cell protease 1A-like [Cyprinus carpio])	gi|109940072|sp|P80219.2|DDN1_BOVIN(RecName: Full=Duodenase-1; AltName: Full=Duodenase I; AltName: Full=Duodenum serine protease; Flags: Precursor)
TRINITY_DN20304_c1_g2	2.48399	9.88e-19	1.96e-17	yes	up	3.15	18.59	XP_017313883.1(PREDICTED: uncharacterized protein LOC108259163 [Ictalurus punctatus])	gi|130585|sp|P10272.1|POL_BAEVM(RecName: Full=Pol polyprotein; Contains: RecName: Full=Protease; Contains: RecName: Full=Reverse transcriptase/ribonuclease H; Short=RT; Contains: RecName: Full=Integrase; Short=IN)
TRINITY_DN24830_c0_g1	1.66509	1.07e-18	2.12e-17	yes	up	27.34	113.54	None	None
TRINITY_DN38554_c1_g1	-2.57741	1.12e-18	2.22e-17	yes	down	21.74	8	KTF75096.1(hypothetical protein cypCar_00033410 [Cyprinus carpio])	None
TRINITY_DN28862_c6_g2	-2.30671	1.23e-18	2.42e-17	yes	down	13.5	3.57	None	None
TRINITY_DN25047_c3_g1	1.58105	1.33e-18	2.63e-17	yes	up	11.56	36.2	None	None
TRINITY_DN25987_c1_g1	-5.3104	1.36e-18	2.69e-17	yes	down	8.67	0.87	None	None
TRINITY_DN30096_c2_g2	-2.86523	1.47e-18	2.91e-17	yes	down	1.5	0.22	XP_022055309.1(zinc finger BED domain-containing protein 1-like [Acanthochromis polyacanthus])	gi|41018380|sp|O96006.1|ZBED1_HUMAN(RecName: Full=Zinc finger BED domain-containing protein 1; AltName: Full=Putative Ac-like transposable element; AltName: Full=dREF homolog)
TRINITY_DN20304_c0_g1	2.03684	1.49e-18	2.93e-17	yes	up	2.7	12.91	XP_018949504.1(PREDICTED: uncharacterized protein LOC109078753 [Cyprinus carpio])	None
TRINITY_DN45746_c0_g1	7.06218	1.61e-18	3.17e-17	yes	up	0	4.09	NP_001013512.2(complement receptor-like protein precursor [Danio rerio])	None
TRINITY_DN24030_c0_g6	3.02655	1.76e-18	3.45e-17	yes	up	4.04	8.25	None	None
TRINITY_DN35523_c2_g1	1.80825	1.77e-18	3.47e-17	yes	up	4.14	14.93	None	None
TRINITY_DN30278_c2_g1	-1.45887	1.78e-18	3.49e-17	yes	down	8.49	3.14	KTG39051.1(hypothetical protein cypCar_00006232, partial [Cyprinus carpio])	gi|586132|sp|P37240.1|TSHB_ONCMY(RecName: Full=Thyrotropin subunit beta; AltName: Full=Thyroid-stimulating hormone subunit beta; Short=TSH-B; Short=TSH-beta; AltName: Full=Thyrotropin beta chain; Flags: Precursor [Oncorhynchus mykiss])
TRINITY_DN24884_c4_g3	-3.90024	1.82e-18	3.56e-17	yes	down	19.47	1.31	XP_016107777.1(PREDICTED: uncharacterized protein LOC107566763, partial [Sinocyclocheilus grahami])	None
TRINITY_DN48832_c3_g2	-6.30055	1.87e-18	3.65e-17	yes	down	25.03	1.03	None	None
TRINITY_DN36458_c0_g3	-2.13032	2.1e-18	4.11e-17	yes	down	9.18	2.2	None	None
TRINITY_DN49203_c1_g2	5.99003	2.18e-18	4.25e-17	yes	up	0.04	5.45	XP_016095473.1(PREDICTED: uncharacterized protein LOC107556783 [Sinocyclocheilus grahami])	None
TRINITY_DN46580_c1_g2	-5.29312	2.22e-18	4.33e-17	yes	down	8.8	0.22	None	None
TRINITY_DN46384_c2_g1	-2.64587	2.37e-18	4.62e-17	yes	down	8.75	3.88	XP_018973230.1(PREDICTED: proteoglycan 4-like [Cyprinus carpio])	None
TRINITY_DN42844_c1_g2	1.30301	2.39e-18	4.65e-17	yes	up	5.7	17.65	XP_016095002.1(PREDICTED: protein NDRG1-like isoform X1 [Sinocyclocheilus grahami])	gi|82181171|sp|Q66IG4.1|NDRG1_XENTR(RecName: Full=Protein NDRG1)
TRINITY_DN46984_c2_g2	3.2212	2.45e-18	4.77e-17	yes	up	2.04	19.85	None	None
TRINITY_DN48541_c3_g2	-2.60141	2.46e-18	4.79e-17	yes	down	12.1	4.66	NP_001153940.1(forkhead box R1 [Oryzias latipes])	None
TRINITY_DN22462_c3_g1	-1.38947	2.49e-18	4.83e-17	yes	down	36.58	23.78	None	None
TRINITY_DN48453_c6_g1	-1.08504	2.49e-18	4.84e-17	yes	down	3.21	1.58	NP_001295896.1(ras GTPase-activating-like protein IQGAP3 [Danio rerio])	gi|1170586|sp|P46940.1|IQGA1_HUMAN(RecName: Full=Ras GTPase-activating-like protein IQGAP1; AltName: Full=p195)
TRINITY_DN47203_c1_g2	-3.05437	2.56e-18	4.97e-17	yes	down	8.98	1.54	None	None
TRINITY_DN22829_c0_g2	-2.44594	2.69e-18	5.21e-17	yes	down	3.9	0.8	XP_016303794.1(PREDICTED: uncharacterized protein LOC107659388 isoform X2 [Sinocyclocheilus anshuiensis])	gi|74732341|sp|Q96MB7.1|HARB1_HUMAN(RecName: Full=Putative nuclease HARBI1; AltName: Full=Harbinger transposase-derived nuclease)
TRINITY_DN41188_c0_g1	1.13164	2.73e-18	5.28e-17	yes	up	20.79	93.01	NP_571565.1(major histocompatibility complex class II integral membrane alpha chain precursor [Danio rerio])	gi|6226629|sp|P14434.2|HA2B_MOUSE(RecName: Full=H-2 class II histocompatibility antigen, A-B alpha chain; Short=IAalpha; Flags: Precursor)
TRINITY_DN25348_c2_g2	2.12865	2.77e-18	5.36e-17	yes	up	1.08	4.96	XP_016341001.1(PREDICTED: transmembrane protein 233-like [Sinocyclocheilus anshuiensis])	gi|298351870|sp|B4DJY2.1|TM233_HUMAN(RecName: Full=Transmembrane protein 233; AltName: Full=Dispanin subfamily B member 2; Short=DSPB2; AltName: Full=Interferon-induced transmembrane domain-containing protein D2)
TRINITY_DN35293_c1_g1	2.12865	2.77e-18	5.36e-17	yes	up	15.49	5.28	XP_012685402.1(PREDICTED: LOW QUALITY PROTEIN: uncharacterized protein LOC105902371 [Clupea harengus])	None
TRINITY_DN16773_c0_g1	-4.31589	2.94e-18	5.69e-17	yes	down	13.52	0.71	None	None
TRINITY_DN43393_c0_g3	-2.23789	3.02e-18	5.84e-17	yes	down	62.64	13.75	None	None
TRINITY_DN38702_c0_g1	-7.36147	3.23e-18	6.24e-17	yes	down	3.22	0	XP_017309903.1(PREDICTED: trichohyalin-like [Ictalurus punctatus])	None
TRINITY_DN22284_c1_g2	-2.18737	3.33e-18	6.42e-17	yes	down	153.15	33.89	None	None
TRINITY_DN22415_c2_g1	2.50109	3.38e-18	6.52e-17	yes	up	0.45	6.16	AAH85599.1(Glra4b protein, partial [Danio rerio])	gi|78099775|sp|Q61603.3|GLRA4_MOUSE(RecName: Full=Glycine receptor subunit alpha-4; Flags: Precursor)
TRINITY_DN43738_c2_g2	-3.4798	3.39e-18	6.53e-17	yes	down	36.09	3.3	None	None
TRINITY_DN46542_c2_g1	1.55023	3.4e-18	6.55e-17	yes	up	1.08	3.39	XP_016315943.1(PREDICTED: pancreatic alpha-amylase-like isoform X1 [Sinocyclocheilus anshuiensis])	gi|33860120|sp|P00690.3|AMYP_PIG(RecName: Full=Pancreatic alpha-amylase; Short=PA; AltName: Full=1,4-alpha-D-glucan glucanohydrolase; Flags: Precursor)
TRINITY_DN29060_c2_g1	-3.88034	3.52e-18	6.76e-17	yes	down	0.62	0.04	XP_016392820.1(PREDICTED: uncharacterized protein LOC107727458 [Sinocyclocheilus rhinocerous])	gi|141475|sp|P14381.1|YTX2_XENLA(RecName: Full=Transposon TX1 uncharacterized 149 kDa protein; AltName: Full=ORF 2)
TRINITY_DN40951_c0_g2	1.81042	3.58e-18	6.88e-17	yes	up	2.89	5.69	XP_016094175.1(PREDICTED: uncharacterized protein LOC107555783 [Sinocyclocheilus grahami])	None
TRINITY_DN40006_c1_g5	1.17012	3.83e-18	7.34e-17	yes	up	33.51	78.82	None	None
TRINITY_DN23228_c2_g2	-5.27266	3.92e-18	7.52e-17	yes	down	36.37	2.56	None	None
TRINITY_DN37619_c1_g2	-1.39756	3.99e-18	7.63e-17	yes	down	21.1	8.71	XP_021322800.1(solute carrier family 22, member 7-like isoform X1 [Danio rerio])	gi|167016537|sp|A6QLW8.1|S22A7_BOVIN(RecName: Full=Solute carrier family 22 member 7; AltName: Full=Organic anion transporter 2)
TRINITY_DN31590_c0_g4	-3.21098	4.18e-18	8e-17	yes	down	2.18	0.25	XP_016392820.1(PREDICTED: uncharacterized protein LOC107727458 [Sinocyclocheilus rhinocerous])	gi|126296|sp|P08548.1|LIN1_NYCCO(RecName: Full=LINE-1 reverse transcriptase homolog)
TRINITY_DN42424_c1_g1	1.71141	4.36e-18	8.33e-17	yes	up	0.67	2.29	XP_016347525.1(PREDICTED: alpha-actinin-3 isoform X1 [Sinocyclocheilus anshuiensis])	gi|122144209|sp|Q0III9.1|ACTN3_BOVIN(RecName: Full=Alpha-actinin-3; AltName: Full=Alpha-actinin skeletal muscle isoform 3; AltName: Full=F-actin cross-linking protein)
TRINITY_DN44340_c0_g1	-1.72164	4.48e-18	8.54e-17	yes	down	6.11	1.88	None	None
TRINITY_DN23106_c2_g3	-2.67681	4.6e-18	8.77e-17	yes	down	1.59	0.26	CDQ59409.1(unnamed protein product [Oncorhynchus mykiss])	gi|141475|sp|P14381.1|YTX2_XENLA(RecName: Full=Transposon TX1 uncharacterized 149 kDa protein; AltName: Full=ORF 2)
TRINITY_DN27185_c0_g1	-3.8719	4.65e-18	8.85e-17	yes	down	49.27	1.32	XP_016360112.1(PREDICTED: sorbin and SH3 domain-containing protein 2-like isoform X1 [Sinocyclocheilus anshuiensis])	gi|205831246|sp|O94875.3|SRBS2_HUMAN(RecName: Full=Sorbin and SH3 domain-containing protein 2; AltName: Full=Arg-binding protein 2; Short=ArgBP2; AltName: Full=Arg/Abl-interacting protein 2; AltName: Full=Sorbin)
TRINITY_DN26454_c0_g1	4.10806	4.73e-18	9e-17	yes	up	0.88	15.95	None	None
TRINITY_DN34301_c1_g1	-2.77777	5e-18	9.49e-17	yes	down	20.18	2.11	None	None
TRINITY_DN35514_c0_g2	2.91408	5.1e-18	9.67e-17	yes	up	3.06	14.29	NP_001133228.1(transposase-like [Salmo salar])	gi|464864|sp|P35072.1|TCB1_CAEBR(RecName: Full=Transposable element Tcb1 transposase; AltName: Full=Transposable element Barney transposase)
TRINITY_DN43821_c0_g2	-1.70764	5.55e-18	1.05e-16	yes	down	10.21	1.9	XP_018947974.1(PREDICTED: Werner syndrome ATP-dependent helicase homolog [Cyprinus carpio])	gi|29428101|sp|O93530.1|WRN_XENLA(RecName: Full=Werner syndrome ATP-dependent helicase homolog; AltName: Full=Exonuclease WRN; AltName: Full=Focus-forming activity 1; Short=FFA-1)
TRINITY_DN32578_c0_g2	-1.89586	5.97e-18	1.13e-16	yes	down	135.15	32.87	BAE46429.1(ORF2-encoded protein, partial [Danio rerio])	None
TRINITY_DN41100_c0_g1	-4.71041	6.9e-18	1.3e-16	yes	down	2.3	0.09	XP_016372329.1(PREDICTED: 6-phosphofructo-2-kinase/fructose-2,6-bisphosphatase 2-like [Sinocyclocheilus rhinocerous])	None
TRINITY_DN23612_c1_g6	-5.24957	7.4e-18	1.39e-16	yes	down	0.94	0.03	XP_016143254.1(PREDICTED: heat shock factor protein 1-like isoform X3 [Sinocyclocheilus grahami])	gi|585276|sp|P38529.1|HSF1_CHICK(RecName: Full=Heat shock factor protein 1; Short=HSF 1; AltName: Full=HSF 3A; AltName: Full=HSTF 3A; AltName: Full=Heat shock transcription factor 1; Short=HSTF 1)
TRINITY_DN47896_c0_g1	1.74025	7.65e-18	1.44e-16	yes	up	7.36	20.89	None	None
TRINITY_DN42858_c0_g1	-4.33977	8.23e-18	1.54e-16	yes	down	7.84	0.45	None	None
TRINITY_DN45589_c0_g1	-3.67785	8.47e-18	1.59e-16	yes	down	1.78	0.15	XP_014832625.1(PREDICTED: paraneoplastic antigen Ma1 homolog [Poecilia mexicana])	None
TRINITY_DN45649_c2_g1	-1.38689	8.55e-18	1.6e-16	yes	down	408.6	156.83	None	None
TRINITY_DN32657_c3_g1	-2.71041	8.89e-18	1.66e-16	yes	down	4.57	0.66	XP_018931052.1(PREDICTED: LOW QUALITY PROTEIN: ankyrin and armadillo repeat-containing protein-like [Cyprinus carpio])	gi|147742923|sp|A2RT91.1|ANKAR_MOUSE(RecName: Full=Ankyrin and armadillo repeat-containing protein)
TRINITY_DN39622_c0_g2	-1.40035	9.48e-18	1.77e-16	yes	down	3.95	1.55	XP_016405168.1(PREDICTED: 4F2 cell-surface antigen heavy chain-like isoform X3 [Sinocyclocheilus rhinocerous])	gi|115503757|sp|Q7YQK3.2|4F2_RABIT(RecName: Full=4F2 cell-surface antigen heavy chain; Short=4F2hc; AltName: Full=Solute carrier family 3 member 2; AltName: CD_antigen=CD98)
TRINITY_DN33280_c1_g1	1.25513	9.69e-18	1.81e-16	yes	up	6.09	9.35	None	None
TRINITY_DN24499_c2_g3	-4.06091	1.04e-17	1.94e-16	yes	down	2.52	0.4	None	None
TRINITY_DN38738_c2_g2	1.06162	1.22e-17	2.27e-16	yes	up	42.09	59.47	None	None
TRINITY_DN45909_c0_g2	-3.84031	1.29e-17	2.41e-16	yes	down	130.51	9	None	None
TRINITY_DN26878_c0_g2	-2.56127	1.32e-17	2.46e-16	yes	down	5.53	0.86	XP_024659385.1(G2/M phase-specific E3 ubiquitin-protein ligase-like isoform X1 [Maylandia zebra])	gi|74738611|sp|Q7L622.1|G2E3_HUMAN(RecName: Full=G2/M phase-specific E3 ubiquitin-protein ligase)
TRINITY_DN30777_c1_g1	-1.81661	1.36e-17	2.52e-16	yes	down	18.93	5.94	XP_016138026.1(PREDICTED: uncharacterized protein C1orf109 homolog [Sinocyclocheilus grahami])	gi|254809988|sp|Q8JHH5.3|CA109_DANRE(RecName: Full=Uncharacterized protein C1orf109 homolog)
TRINITY_DN27798_c1_g3	-5.22611	1.4e-17	2.6e-16	yes	down	1.24	0.04	XP_008401335.1(PREDICTED: uncharacterized protein LOC103460806 isoform X1 [Poecilia reticulata])	None
TRINITY_DN34778_c0_g4	3.43643	1.46e-17	2.72e-16	yes	up	0.16	1.86	XP_005172124.1(uncharacterized protein LOC100538256 isoform X1 [Danio rerio])	None
TRINITY_DN23358_c0_g1	-7.29538	1.51e-17	2.79e-16	yes	down	8.52	0	None	None
TRINITY_DN29271_c0_g2	-7.29538	1.51e-17	2.79e-16	yes	down	1.37	0	KTF75658.1(hypothetical protein cypCar_00034686 [Cyprinus carpio])	gi|221271962|sp|A0PJS5.1|CK053_DANRE(RecName: Full=Uncharacterized protein C11orf53 homolog)
TRINITY_DN31798_c0_g4	-7.29538	1.51e-17	2.79e-16	yes	down	6.77	0	KTG36396.1(hypothetical protein cypCar_00040872 [Cyprinus carpio])	None
TRINITY_DN34095_c1_g3	-7.29538	1.51e-17	2.79e-16	yes	down	1.49	0	XP_022539726.1(uncharacterized protein LOC111195777 isoform X1 [Astyanax mexicanus])	None
TRINITY_DN23734_c2_g3	-2.64736	1.54e-17	2.85e-16	yes	down	3.77	0.5	None	None
TRINITY_DN37292_c2_g2	-1.61335	1.71e-17	3.16e-16	yes	down	8.7	2.62	XP_016330591.1(PREDICTED: somatolactin [Sinocyclocheilus anshuiensis])	gi|2500857|sp|P79697.1|SOML_CARAU(RecName: Full=Somatolactin; Short=SL; Flags: Precursor [Carassius auratus])
TRINITY_DN24110_c0_g2	-2.43833	1.74e-17	3.21e-16	yes	down	3.81	0.78	XP_016357129.1(PREDICTED: myozenin-1-like [Sinocyclocheilus anshuiensis])	gi|75041260|sp|Q5R6I2.1|MYOZ2_PONAB(RecName: Full=Myozenin-2; AltName: Full=Calsarcin-1)
TRINITY_DN29373_c1_g1	-2.93096	1.76e-17	3.23e-16	yes	down	3.31	2.16	XP_016407564.1(PREDICTED: piggyBac transposable element-derived protein 4-like [Sinocyclocheilus rhinocerous])	gi|296439278|sp|Q8N328.3|PGBD3_HUMAN(RecName: Full=PiggyBac transposable element-derived protein 3)
TRINITY_DN30027_c1_g3	4.41594	1.84e-17	3.39e-16	yes	up	0.06	7.09	XP_016414052.1(PREDICTED: uncharacterized protein LOC107744761 [Sinocyclocheilus rhinocerous])	gi|132574|sp|P10775.1|RINI_PIG(RecName: Full=Ribonuclease inhibitor; AltName: Full=Ribonuclease/angiogenin inhibitor 1)
TRINITY_DN44940_c0_g1	-1.00831	1.85e-17	3.4e-16	yes	down	9.36	6.65	None	None
TRINITY_DN25640_c1_g1	2.78733	1.95e-17	3.58e-16	yes	up	5.42	51.07	None	None
TRINITY_DN42450_c0_g1	4.413	2.01e-17	3.68e-16	yes	up	0.35	7.71	XP_013866042.1(PREDICTED: N-acylneuraminate cytidylyltransferase-like [Austrofundulus limnaeus])	gi|68059546|sp|Q90WG6.1|NEUA_ONCMY(RecName: Full=N-acylneuraminate cytidylyltransferase; AltName: Full=CMP-N-acetylneuraminic acid synthase; Short=CMP-NeuNAc synthase)
TRINITY_DN25704_c0_g1	1.3087	2.03e-17	3.72e-16	yes	up	12.66	31.36	None	None
TRINITY_DN35263_c0_g2	2.23069	2.05e-17	3.75e-16	yes	up	4.1	20.13	None	None
TRINITY_DN31587_c4_g1	-1.41339	2.11e-17	3.86e-16	yes	down	29.1	15.73	None	None
TRINITY_DN29011_c1_g2	2.6681	2.13e-17	3.9e-16	yes	up	0.25	1.7	XP_016342195.1(PREDICTED: LOW QUALITY PROTEIN: uncharacterized protein LOC107688880 [Sinocyclocheilus anshuiensis])	None
TRINITY_DN26747_c0_g1	-3.37338	2.3e-17	4.19e-16	yes	down	2.49	0.25	XP_019205860.1(PREDICTED: uncharacterized protein LOC109196336 [Oreochromis niloticus])	None
TRINITY_DN27491_c0_g1	-1.21664	2.36e-17	4.3e-16	yes	down	27.44	31.64	None	None
TRINITY_DN32533_c0_g1	1.00635	2.37e-17	4.32e-16	yes	up	10.5	28.98	XP_018952666.1(PREDICTED: protein eva-1 homolog C-like isoform X3 [Cyprinus carpio])	gi|55976366|sp|Q68US5.1|EVA1C_PANTR(RecName: Full=Protein eva-1 homolog C; AltName: Full=Protein FAM176C; Flags: Precursor)
TRINITY_DN27733_c1_g1	-1.23756	2.41e-17	4.39e-16	yes	down	19.51	8.05	NP_001108214.2(gamma-aminobutyric acid (GABA) A receptor, pi precursor [Danio rerio])	gi|75057875|sp|Q5EA06.1|GBRP_BOVIN(RecName: Full=Gamma-aminobutyric acid receptor subunit pi; AltName: Full=GABA(A) receptor subunit pi; Flags: Precursor)
TRINITY_DN42652_c0_g1	-7.27266	2.52e-17	4.59e-16	yes	down	0.78	0	XP_019210590.1(PREDICTED: uncharacterized protein K02A2.6-like [Oreochromis niloticus])	gi|134034966|sp|Q99315.3|YG31B_YEAST(RecName: Full=Transposon Ty3-G Gag-Pol polyprotein; AltName: Full=Gag3-Pol3; AltName: Full=Transposon Ty3-1 TYA-TYB polyprotein; Contains: RecName: Full=Capsid protein; Short=CA; AltName: Full=p24; Contains: RecName: Full=Spacer peptide p3; Contains: RecName: Full=Nucleocapsid protein p11; Short=NC; Contains: RecName: Full=Ty3 protease; Short=PR; AltName: Full…
TRINITY_DN35748_c1_g1	-5.20227	2.65e-17	4.81e-16	yes	down	11.97	0.12	None	None
TRINITY_DN43317_c1_g3	1.44159	2.82e-17	5.1e-16	yes	up	14.48	41.16	None	None
TRINITY_DN34017_c0_g1	-4.29538	3.09e-17	5.58e-16	yes	down	4.98	0.03	XP_016313558.1(PREDICTED: L-dopachrome tautomerase-like [Sinocyclocheilus anshuiensis])	gi|75075156|sp|Q4R1H1.1|TYRP2_PIG(RecName: Full=L-dopachrome tautomerase; Short=DCT; Short=DT; AltName: Full=L-dopachrome Delta-isomerase; AltName: Full=Tyrosinase-related protein 2; Short=TRP-2; Short=TRP2; Flags: Precursor)
TRINITY_DN45021_c1_g2	-4.29538	3.09e-17	5.58e-16	yes	down	5.3	0.28	XP_018979920.1(PREDICTED: uncharacterized protein LOC109111435 [Cyprinus carpio])	None
TRINITY_DN26662_c1_g1	-2.73148	3.14e-17	5.67e-16	yes	down	12.06	1.65	None	None
TRINITY_DN49074_c1_g2	-2.91429	3.28e-17	5.9e-16	yes	down	12.24	0.73	None	None
TRINITY_DN47846_c2_g1	-2.84792	3.29e-17	5.92e-16	yes	down	7.02	3.92	XP_018924560.1(PREDICTED: uncharacterized protein LOC109051463 [Cyprinus carpio])	None
TRINITY_DN23150_c2_g3	3.14941	3.34e-17	5.99e-16	yes	up	0.49	4.57	XP_017568112.1(PREDICTED: cytidine deaminase-like [Pygocentrus nattereri])	gi|1705718|sp|P32320.2|CDD_HUMAN(RecName: Full=Cytidine deaminase; AltName: Full=Cytidine aminohydrolase)
TRINITY_DN30762_c0_g1	-1.91137	3.48e-17	6.24e-16	yes	down	33.36	7.77	None	None
TRINITY_DN32453_c0_g1	3.04091	3.63e-17	6.5e-16	yes	up	0.18	1.53	XP_016422926.1(PREDICTED: collagen alpha-2(XI) chain-like [Sinocyclocheilus rhinocerous])	gi|85687376|sp|P20908.3|CO5A1_HUMAN(RecName: Full=Collagen alpha-1(V) chain; Flags: Precursor)
TRINITY_DN33578_c6_g1	-2.32185	3.67e-17	6.56e-16	yes	down	11.7	4.44	None	None
TRINITY_DN48253_c3_g3	-1.29807	3.67e-17	6.57e-16	yes	down	11.27	5.35	XP_018975708.1(PREDICTED: serine/threonine/tyrosine-interacting protein A-like isoform X2 [Cyprinus carpio])	gi|82225812|sp|Q4V7N3.1|STYXA_XENLA(RecName: Full=Serine/threonine/tyrosine-interacting protein A)
TRINITY_DN39616_c0_g1	-1.40692	3.78e-17	6.75e-16	yes	down	5.66	2.87	XP_018559640.1(PREDICTED: choline kinase alpha-like isoform X1 [Lates calcarifer])	gi|6686290|sp|Q01134.2|CHKA_RAT(RecName: Full=Choline kinase alpha; Short=CK; AltName: Full=CHETK-alpha; AltName: Full=Ethanolamine kinase; Short=EK)
TRINITY_DN43771_c0_g2	-7.24957	4.24e-17	7.56e-16	yes	down	3.99	0	None	None
TRINITY_DN40116_c0_g1	2.53602	4.75e-17	8.45e-16	yes	up	0.14	0.86	XP_003201626.4(myomesin-2 [Danio rerio])	gi|224471842|sp|P54296.2|MYOM2_HUMAN(RecName: Full=Myomesin-2; AltName: Full=165 kDa connectin-associated protein; AltName: Full=165 kDa titin-associated protein; AltName: Full=M-protein; AltName: Full=Myomesin family member 2)
TRINITY_DN47443_c2_g1	-1.03646	4.77e-17	8.48e-16	yes	down	35.1	18.08	None	None
TRINITY_DN23685_c1_g5	4.03303	4.79e-17	8.52e-16	yes	up	0.38	6.48	XP_018920186.1(PREDICTED: C-Jun-amino-terminal kinase-interacting protein 1-like [Cyprinus carpio])	gi|172046699|sp|Q86TG7.2|PEG10_HUMAN(RecName: Full=Retrotransposon-derived protein PEG10; AltName: Full=Embryonal carcinoma differentiation-regulated protein; AltName: Full=Mammalian retrotransposon-derived protein 2; AltName: Full=Myelin expression factor 3-like protein 1; Short=MEF3-like protein 1; AltName: Full=Paternally expressed gene 10 protein; AltName: Full=Retrotransposon gag domain-cont…
TRINITY_DN44404_c2_g2	2.27909	4.81e-17	8.56e-16	yes	up	0.95	4.7	None	None
TRINITY_DN42582_c0_g2	1.55011	4.84e-17	8.6e-16	yes	up	1.17	3.2	XP_016414616.1(PREDICTED: ectonucleotide pyrophosphatase/phosphodiesterase family member 1-like [Sinocyclocheilus rhinocerous])	gi|23503088|sp|P22413.2|ENPP1_HUMAN(RecName: Full=Ectonucleotide pyrophosphatase/phosphodiesterase family member 1; Short=E-NPP 1; AltName: Full=Membrane component chromosome 6 surface marker 1; AltName: Full=Phosphodiesterase I/nucleotide pyrophosphatase 1; AltName: Full=Plasma-cell membrane glycoprotein PC-1; Includes: RecName: Full=Alkaline phosphodiesterase I; Includes: RecName: Full=Nucleoti…
TRINITY_DN21165_c0_g1	-2.10673	5.15e-17	9.14e-16	yes	down	71.2	22.57	None	None
TRINITY_DN38357_c0_g1	-1.09374	5.64e-17	1e-15	yes	down	22.76	10.88	None	None
TRINITY_DN41706_c0_g4	-3.05026	5.79e-17	1.02e-15	yes	down	1.45	0.18	XP_014007289.1(PREDICTED: uncharacterized protein LOC106575331 [Salmo salar])	gi|1353154|sp|Q09575.1|YRD6_CAEEL(RecName: Full=Uncharacterized protein K02A2.6)
TRINITY_DN23550_c2_g1	3.5626	5.85e-17	1.04e-15	yes	up	0.47	6.09	XP_018939907.1(PREDICTED: plakophilin-1-like, partial [Cyprinus carpio])	None
TRINITY_DN32513_c2_g2	-4.27266	5.98e-17	1.06e-15	yes	down	10.08	0.44	None	None
TRINITY_DN32314_c0_g1	1.67661	6.19e-17	1.09e-15	yes	up	2.05	6.87	XP_021334226.1(nephrocystin-4-like [Danio rerio])	gi|172045711|sp|Q7TN75.2|PEG10_MOUSE(RecName: Full=Retrotransposon-derived protein PEG10; AltName: Full=Embryonal carcinoma differentiation regulated protein; AltName: Full=Mammalian retrotransposon-derived protein 2; AltName: Full=Myelin expression factor 3; Short=MyEF-3; AltName: Full=Myelin expression factor 3-like protein 1; Short=MEF3-like protein 1; AltName: Full=Paternally expressed gene 1…
TRINITY_DN47684_c1_g1	2.11644	6.34e-17	1.12e-15	yes	up	6.78	27.32	XP_016378556.1(PREDICTED: oxidation resistance protein 1-like isoform X3 [Sinocyclocheilus rhinocerous])	gi|294862456|sp|Q8N573.2|OXR1_HUMAN(RecName: Full=Oxidation resistance protein 1)
TRINITY_DN38774_c0_g1	-2.07965	6.63e-17	1.17e-15	yes	down	2.64	0.57	XP_018919995.1(PREDICTED: extracellular serine/threonine protein kinase FAM20C-like [Cyprinus carpio])	gi|327478506|sp|Q8IXL6.2|FA20C_HUMAN(RecName: Full=Extracellular serine/threonine protein kinase FAM20C; AltName: Full=Dentin matrix protein 4; Short=DMP-4; AltName: Full=Golgi casein kinase; AltName: Full=Golgi-enriched fraction casein kinase; Short=GEF-CK; Flags: Precursor)
TRINITY_DN40414_c0_g3	3.38928	7.15e-17	1.26e-15	yes	up	0.82	8.98	KTF91580.1(hypothetical protein cypCar_00027793 [Cyprinus carpio])	None
TRINITY_DN25214_c0_g1	-3.4653	7.28e-17	1.28e-15	yes	down	2.01	0.19	AAL35359.2(lambda-recombinase-like protein, partial [Tetraodon nigroviridis])	None
TRINITY_DN39890_c2_g5	-3.99582	7.6e-17	1.34e-15	yes	down	64.5	4.11	None	None
TRINITY_DN32384_c0_g1	1.08023	7.84e-17	1.37e-15	yes	up	0.93	5.33	XP_018964140.1(PREDICTED: uncharacterized protein LOC109094915 [Cyprinus carpio])	gi|130398|sp|P20825.1|POL2_DROME(RecName: Full=Retrovirus-related Pol polyprotein from transposon 297; Includes: RecName: Full=Protease; Includes: RecName: Full=Reverse transcriptase; Includes: RecName: Full=Endonuclease)
TRINITY_DN25883_c2_g4	3.00081	8.11e-17	1.42e-15	yes	up	1.33	6.56	XP_016360495.1(PREDICTED: uncharacterized protein LOC107702635 isoform X1 [Sinocyclocheilus anshuiensis])	None
TRINITY_DN18855_c3_g1	-3.57528	8.19e-17	1.44e-15	yes	down	24.12	2.11	None	None
TRINITY_DN20919_c0_g3	6.89445	8.25e-17	1.44e-15	yes	up	0	0.88	XP_018963788.1(PREDICTED: tumor necrosis factor receptor superfamily member 14-like isoform X2 [Cyprinus carpio])	gi|116256094|sp|Q3LRP1.1|TNR5_CALJA(RecName: Full=Tumor necrosis factor receptor superfamily member 5; AltName: Full=B-cell surface antigen CD40; AltName: Full=CD40L receptor; AltName: CD_antigen=CD40; Flags: Precursor)
TRINITY_DN21940_c0_g1	-1.25013	9.02e-17	1.58e-15	yes	down	129.37	59.99	None	None
TRINITY_DN35785_c1_g1	-1.34016	9.13e-17	1.59e-15	yes	down	16.46	9.59	None	None
TRINITY_DN28882_c0_g6	-1.92341	9.32e-17	1.63e-15	yes	down	1.2	0.57	XP_018964562.1(PREDICTED: uncharacterized protein LOC109095310 [Cyprinus carpio])	gi|38258172|sp|Q8I7P9.1|POL5_DROME(RecName: Full=Retrovirus-related Pol polyprotein from transposon opus; Includes: RecName: Full=Protease; Includes: RecName: Full=Reverse transcriptase; Includes: RecName: Full=Endonuclease)
TRINITY_DN46835_c3_g1	-1.256	9.41e-17	1.64e-15	yes	down	5.99	2.83	NP_571400.1(paired box 7 isoform PAX7C [Danio rerio])	gi|857434982|sp|P23759.4|PAX7_HUMAN(RecName: Full=Paired box protein Pax-7; AltName: Full=HuP1)
TRINITY_DN35434_c2_g2	-5.15336	9.49e-17	1.65e-15	yes	down	10.27	0.3	None	None
TRINITY_DN27321_c3_g1	-2.00997	1.02e-16	1.77e-15	yes	down	3.19	0.83	XP_016104334.1(PREDICTED: uncharacterized protein LOC107563880 [Sinocyclocheilus grahami])	None
TRINITY_DN20527_c5_g3	-3.12135	1.03e-16	1.79e-15	yes	down	16.42	1.97	None	None
TRINITY_DN30476_c1_g3	-3.03234	1.09e-16	1.89e-15	yes	down	23.35	4.66	XP_016347817.1(PREDICTED: proto-oncogene tyrosine-protein kinase ROS-like [Sinocyclocheilus anshuiensis])	None
TRINITY_DN43861_c0_g3	-2.43003	1.13e-16	1.96e-15	yes	down	1.23	0.24	XP_021332211.1(uncharacterized protein LOC101886116 [Danio rerio])	gi|130407|sp|P10394.1|POL4_DROME(RecName: Full=Retrovirus-related Pol polyprotein from transposon 412; Includes: RecName: Full=Protease; Includes: RecName: Full=Reverse transcriptase; Includes: RecName: Full=Endonuclease)
TRINITY_DN41032_c2_g2	-1.71651	1.15e-16	1.99e-15	yes	down	16.81	3.48	XP_016307546.1(PREDICTED: alanine--glyoxylate aminotransferase 2, mitochondrial-like [Sinocyclocheilus anshuiensis])	gi|17432913|sp|Q9BYV1.1|AGT2_HUMAN(RecName: Full=Alanine--glyoxylate aminotransferase 2, mitochondrial; Short=AGT 2; AltName: Full=(R)-3-amino-2-methylpropionate--pyruvate transaminase; AltName: Full=Beta-ALAAT II; AltName: Full=Beta-alanine-pyruvate aminotransferase; AltName: Full=D-AIBAT; Flags: Precursor)
TRINITY_DN34251_c3_g1	-4.24957	1.16e-16	2.01e-15	yes	down	17.61	0.86	None	None
TRINITY_DN34084_c0_g3	-3.59655	1.18e-16	2.03e-15	yes	down	6.14	0.5	None	None
TRINITY_DN26683_c2_g3	6.87455	1.28e-16	2.22e-15	yes	up	0	17.61	CAF95346.1(unnamed protein product, partial [Tetraodon nigroviridis])	gi|54036667|sp|P68035.1|ACTC_RAT(RecName: Full=Actin, alpha cardiac muscle 1; AltName: Full=Alpha-cardiac actin; Flags: Precursor >gi|54036697|sp|P68032.1|ACTC_HUMAN RecName: Full=Actin, alpha cardiac muscle 1; AltName: Full=Alpha-cardiac actin; Flags: Precursor >gi|54036698|sp|P68033.1|ACTC_MOUSE RecName: Full=Actin, alpha cardiac muscle 1; AltName: Full=Alpha-cardiac actin; Flags: Precursor >gi…
TRINITY_DN35202_c0_g4	-6.12827	1.29e-16	2.22e-15	yes	down	30.52	0.76	None	None
TRINITY_DN37542_c0_g3	1.10075	1.36e-16	2.35e-15	yes	up	16.11	36.19	None	None
TRINITY_DN41556_c2_g1	1.15888	1.49e-16	2.57e-15	yes	up	27.71	68.8	XP_018974602.1(PREDICTED: UDP-glucuronosyltransferase 2C1-like isoform X1 [Cyprinus carpio])	gi|549152|sp|P35503.1|UD13_HUMAN(RecName: Full=UDP-glucuronosyltransferase 1-3; Short=UDPGT 1-3; Short=UGT1*3; Short=UGT1-03; Short=UGT1.3; AltName: Full=UDP-glucuronosyltransferase 1-C; Short=UGT-1C; Short=UGT1C; AltName: Full=UDP-glucuronosyltransferase 1A3; Flags: Precursor)
TRINITY_DN47568_c3_g2	2.41089	1.53e-16	2.64e-15	yes	up	2.81	15.62	XP_016304194.1(PREDICTED: testican-2-like isoform X1 [Sinocyclocheilus anshuiensis])	gi|24418721|sp|Q9ER58.1|TICN2_MOUSE(RecName: Full=Testican-2; AltName: Full=SPARC/osteonectin, CWCV, and Kazal-like domains proteoglycan 2; Flags: Precursor)
TRINITY_DN45380_c0_g1	2.09694	1.53e-16	2.64e-15	yes	up	0.79	1.98	XP_016428925.1(PREDICTED: protein SOGA1-like isoform X1 [Sinocyclocheilus rhinocerous])	gi|218511993|sp|O94964.2|SOGA1_HUMAN(RecName: Full=Protein SOGA1; AltName: Full=SOGA family member 1; AltName: Full=Suppressor of glucose by autophagy; AltName: Full=Suppressor of glucose, autophagy-associated protein 1; Contains: RecName: Full=N-terminal form; Contains: RecName: Full=C-terminal 80 kDa form; Short=80-kDa SOGA fragment)
TRINITY_DN32344_c0_g1	1.60143	1.67e-16	2.88e-15	yes	up	9.79	27.23	XP_017346909.1(PREDICTED: tubulin alpha-1A chain-like [Ictalurus punctatus])	gi|135393|sp|P02552.1|TBA1_CHICK(RecName: Full=Tubulin alpha-1 chain)
TRINITY_DN25908_c1_g1	2.74565	1.72e-16	2.96e-15	yes	up	7.48	3.41	XP_001334950.1(uncharacterized protein si:ch211-76l23.4 [Danio rerio])	None
TRINITY_DN44811_c3_g2	-2.17407	1.76e-16	3.02e-15	yes	down	53.22	18.33	None	None
TRINITY_DN38917_c1_g1	2.45356	1.77e-16	3.03e-15	yes	up	0.84	3.43	XP_018935491.1(PREDICTED: LOW QUALITY PROTEIN: protein regulator of cytokinesis 1-like [Cyprinus carpio])	gi|215273870|sp|O43663.2|PRC1_HUMAN(RecName: Full=Protein regulator of cytokinesis 1)
TRINITY_DN38477_c0_g2	-3.20227	1.79e-16	3.07e-15	yes	down	3.1	1.29	None	None
TRINITY_DN43889_c0_g1	-3.20227	1.79e-16	3.07e-15	yes	down	0.68	0.08	XP_024154359.1(uncharacterized protein K02A2.6-like, partial [Oryzias melastigma])	gi|1353154|sp|Q09575.1|YRD6_CAEEL(RecName: Full=Uncharacterized protein K02A2.6)
TRINITY_DN32192_c1_g1	1.19979	1.9e-16	3.25e-15	yes	up	5.12	12.18	XP_018963350.1(PREDICTED: urocortin-3-like [Cyprinus carpio])	gi|122134530|sp|Q1RMJ9.1|UCN3_BOVIN(RecName: Full=Urocortin-3; AltName: Full=Urocortin III; Short=Ucn III; Flags: Precursor)
TRINITY_DN21012_c2_g2	1.75484	1.98e-16	3.39e-15	yes	up	39.66	44.89	None	None
TRINITY_DN24310_c0_g3	-1.49232	2.02e-16	3.44e-15	yes	down	11.03	3.81	AGV52144.1(MHC class II beta antigen [Megalobrama amblycephala])	gi|122268|sp|P06345.1|HB2S_MOUSE(RecName: Full=H-2 class II histocompatibility antigen, A-S beta chain; Flags: Precursor)
TRINITY_DN26147_c0_g12	-7.17802	2.02e-16	3.45e-15	yes	down	7.07	0	None	None
TRINITY_DN35253_c0_g2	1.99003	2.03e-16	3.46e-15	yes	up	0.81	1.22	XP_021334418.1(interleukin-1 receptor accessory protein-like 1-A isoform X1 [Danio rerio])	gi|38258172|sp|Q8I7P9.1|POL5_DROME(RecName: Full=Retrovirus-related Pol polyprotein from transposon opus; Includes: RecName: Full=Protease; Includes: RecName: Full=Reverse transcriptase; Includes: RecName: Full=Endonuclease)
TRINITY_DN23341_c0_g1	1.30678	2.06e-16	3.51e-15	yes	up	13.81	36.18	XP_018952128.1(PREDICTED: uncharacterized protein LOC109081593 isoform X1 [Cyprinus carpio])	None
TRINITY_DN20330_c3_g2	-1.77691	2.08e-16	3.53e-15	yes	down	9.92	2.97	None	None
TRINITY_DN37517_c5_g1	-3.30576	2.19e-16	3.73e-15	yes	down	11.49	1.14	None	None
TRINITY_DN47417_c1_g3	1.93741	2.25e-16	3.82e-15	yes	up	18.38	74.46	None	None
TRINITY_DN27049_c0_g1	-1.449	2.32e-16	3.94e-15	yes	down	62.1	23.73	None	None
TRINITY_DN48180_c2_g1	-1.02809	2.55e-16	4.31e-15	yes	down	6.03	2.06	XP_016358818.1(PREDICTED: uncharacterized protein LOC107701342 [Sinocyclocheilus anshuiensis])	None
TRINITY_DN37100_c0_g5	1.1118	2.6e-16	4.39e-15	yes	up	1.13	2.56	NP_001077313.1(collagen alpha-1(XI) chain [Danio rerio])	gi|215274245|sp|P12107.4|COBA1_HUMAN(RecName: Full=Collagen alpha-1(XI) chain; Flags: Precursor)
TRINITY_DN43939_c0_g1	-3.42466	2.68e-16	4.53e-15	yes	down	7.72	1.05	None	None
TRINITY_DN39779_c0_g3	-1.81139	2.72e-16	4.58e-15	yes	down	1.07	0.32	XP_017207046.1(uncharacterized protein LOC101886504 [Danio rerio])	None
TRINITY_DN25319_c0_g4	-3.95233	2.73e-16	4.6e-15	yes	down	40.1	2.66	None	None
TRINITY_DN44658_c0_g1	-1.34555	2.94e-16	4.95e-15	yes	down	9.43	12.08	XP_021331267.1(uncharacterized protein LOC110439519 [Danio rerio])	gi|130405|sp|P04323.1|POL3_DROME(RecName: Full=Retrovirus-related Pol polyprotein from transposon 17.6; Includes: RecName: Full=Protease; Includes: RecName: Full=Reverse transcriptase; Includes: RecName: Full=Endonuclease)
TRINITY_DN41422_c0_g1	5.7923	2.98e-16	5.01e-15	yes	up	0.2	11.65	None	None
TRINITY_DN31386_c0_g2	3.71164	3.17e-16	5.32e-15	yes	up	0.52	6.51	XP_016406709.1(PREDICTED: ribonuclease inhibitor-like, partial [Sinocyclocheilus rhinocerous])	gi|34223733|sp|P59046.2|NAL12_HUMAN(RecName: Full=NACHT, LRR and PYD domains-containing protein 12; AltName: Full=Monarch-1; AltName: Full=PYRIN-containing APAF1-like protein 7; AltName: Full=Regulated by nitric oxide)
TRINITY_DN25630_c1_g4	-7.15336	3.42e-16	5.72e-15	yes	down	2.01	0	None	None
TRINITY_DN42887_c2_g3	-7.15336	3.42e-16	5.72e-15	yes	down	144.11	0	None	None
TRINITY_DN45785_c0_g1	-7.15336	3.42e-16	5.72e-15	yes	down	1.89	0	None	None
TRINITY_DN30623_c0_g1	-5.10273	3.42e-16	5.72e-15	yes	down	0.61	0.02	XP_016368342.1(PREDICTED: laminin subunit alpha-3-like [Sinocyclocheilus rhinocerous])	gi|215274012|sp|Q16787.2|LAMA3_HUMAN(RecName: Full=Laminin subunit alpha-3; AltName: Full=Epiligrin 170 kDa subunit; Short=E170; AltName: Full=Epiligrin subunit alpha; AltName: Full=Kalinin subunit alpha; AltName: Full=Laminin-5 subunit alpha; AltName: Full=Laminin-6 subunit alpha; AltName: Full=Laminin-7 subunit alpha; AltName: Full=Nicein subunit alpha; Flags: Precursor)
TRINITY_DN24866_c1_g1	-1.05755	3.53e-16	5.89e-15	yes	down	45.55	29.77	None	None
TRINITY_DN49130_c4_g2	-3.41266	3.92e-16	6.52e-15	yes	down	16.69	0.96	None	None
TRINITY_DN44094_c0_g2	-2.91686	3.95e-16	6.58e-15	yes	down	23.07	2.54	None	None
TRINITY_DN23415_c0_g1	-4.20227	4.36e-16	7.26e-15	yes	down	1.47	0.12	None	None
TRINITY_DN45549_c0_g2	1.18299	4.5e-16	7.49e-15	yes	up	7.27	16.43	XP_018948917.1(PREDICTED: uncharacterized protein LOC109078064 [Cyprinus carpio])	None
TRINITY_DN27014_c3_g2	-3.35771	4.65e-16	7.72e-15	yes	down	5.83	3.32	None	None
TRINITY_DN24310_c0_g1	-6.07122	4.78e-16	7.93e-15	yes	down	5.38	0.06	XP_018977783.1(PREDICTED: H-2 class II histocompatibility antigen, E-S beta chain-like [Cyprinus carpio])	None
TRINITY_DN36334_c0_g2	-2.51261	5.12e-16	8.48e-15	yes	down	8.64	1.59	None	None
TRINITY_DN46999_c2_g3	-2.19278	5.47e-16	9.05e-15	yes	down	30.93	7.06	None	None
TRINITY_DN38465_c0_g3	1.33906	5.48e-16	9.07e-15	yes	up	5.3	14.04	AJY58105.1(tropomyosin 4a [Ctenopharyngodon idella])	gi|60390740|sp|P84335.1|TPM1_LIZAU(RecName: Full=Tropomyosin alpha-1 chain; AltName: Full=Alpha-tropomyosin; AltName: Full=Tropomyosin-1)
TRINITY_DN38779_c0_g1	-1.35766	5.5e-16	9.09e-15	yes	down	2.74	1.12	KTF76059.1(hypothetical protein cypCar_00030628 [Cyprinus carpio])	gi|74711413|sp|Q6ZSG2.1|F196A_HUMAN(RecName: Full=Protein FAM196A)
TRINITY_DN34488_c1_g3	-3.92764	5.55e-16	9.17e-15	yes	down	10.43	0.77	None	None
TRINITY_DN30022_c0_g2	2.06719	5.73e-16	9.46e-15	yes	up	7.75	15.4	None	None
TRINITY_DN37619_c1_g1	-1.80995	5.75e-16	9.47e-15	yes	down	39.91	11.78	XP_005158747.1(solute carrier family 22, member 7-like isoform X3 [Danio rerio])	gi|81871841|sp|Q5RLM2.1|S22A7_RAT(RecName: Full=Solute carrier family 22 member 7; AltName: Full=Novel liver transporter; AltName: Full=Organic anion transporter 2)
TRINITY_DN20446_c2_g2	-7.12827	5.79e-16	9.53e-15	yes	down	1.96	0	None	None
TRINITY_DN38192_c0_g1	-7.12827	5.79e-16	9.53e-15	yes	down	6.94	0	None	None
TRINITY_DN39135_c1_g1	-7.12827	5.79e-16	9.53e-15	yes	down	8.72	0	None	None
TRINITY_DN28491_c0_g3	-1.67389	5.93e-16	9.74e-15	yes	down	36.65	11.54	None	None
TRINITY_DN21356_c1_g2	3.32353	5.97e-16	9.8e-15	yes	up	0.85	8.93	None	None
TRINITY_DN29520_c0_g1	2.12313	5.99e-16	9.83e-15	yes	up	0.53	2.41	XP_016295991.1(PREDICTED: ATP-sensitive inward rectifier potassium channel 1-like [Sinocyclocheilus anshuiensis])	gi|1352479|sp|P48048.1|KCNJ1_HUMAN(RecName: Full=ATP-sensitive inward rectifier potassium channel 1; AltName: Full=ATP-regulated potassium channel ROM-K; AltName: Full=Inward rectifier K(+) channel Kir1.1; AltName: Full=Potassium channel, inwardly rectifying subfamily J member 1)
TRINITY_DN32462_c1_g1	-1.12279	6.15e-16	1.01e-14	yes	down	181.59	70.35	BAE46429.1(ORF2-encoded protein, partial [Danio rerio])	None
TRINITY_DN45513_c1_g3	1.30535	6.73e-16	1.1e-14	yes	up	5.77	14.94	None	None
TRINITY_DN37821_c3_g2	-1.30832	6.84e-16	1.12e-14	yes	down	13.47	5.7	None	None
TRINITY_DN23937_c3_g1	3.18036	6.85e-16	1.12e-14	yes	up	0.1	0.94	XP_019206319.1(PREDICTED: RNA-directed DNA polymerase from mobile element jockey-like [Oreochromis niloticus])	gi|74825508|sp|Q9NBX4.1|RTXE_DROME(RecName: Full=Probable RNA-directed DNA polymerase from transposon X-element; AltName: Full=Reverse transcriptase)
TRINITY_DN46985_c2_g1	-2.04874	6.98e-16	1.14e-14	yes	down	5.99	1.2		gi|130687|sp|P27536.1|POST_XENLA(RecName: Full=Posterior protein; Short=xPO)
TRINITY_DN44535_c0_g1	2.63874	7.2e-16	1.18e-14	yes	up	1.71	8.62	None	None
TRINITY_DN40576_c0_g2	1.22463	7.44e-16	1.21e-14	yes	up	9.73	25.12	XP_016311751.1(PREDICTED: leukocyte elastase inhibitor-like [Sinocyclocheilus anshuiensis])	gi|82195170|sp|Q5I0S8.1|ILEU_XENTR(RecName: Full=Leukocyte elastase inhibitor; AltName: Full=Serpin B1)
TRINITY_DN47038_c2_g1	-1.03831	7.48e-16	1.22e-14	yes	down	6.59	3.48	KTF78883.1(hypothetical protein cypCar_00022112 [Cyprinus carpio])	gi|56404619|sp|Q8K561.1|OTOAN_MOUSE(RecName: Full=Otoancorin; Flags: Precursor)
TRINITY_DN29659_c1_g2	1.36237	7.56e-16	1.23e-14	yes	up	24.22	13.45	XP_022541363.1(uncharacterized protein LOC111196389 [Astyanax mexicanus])	gi|82582284|sp|Q6CQE5.2|TAR1_KLULA(RecName: Full=Protein TAR1)
TRINITY_DN37125_c0_g1	1.08063	7.72e-16	1.26e-14	yes	up	5.54	15.49	XP_022529597.1(xylulose kinase isoform X2 [Astyanax mexicanus])	gi|91207989|sp|Q3SYZ6.1|XYLB_BOVIN(RecName: Full=Xylulose kinase; Short=Xylulokinase)
TRINITY_DN39667_c0_g1	-1.53713	7.76e-16	1.26e-14	yes	down	26.08	13	None	None
TRINITY_DN23320_c0_g1	-3.26336	8.53e-16	1.38e-14	yes	down	14.89	3.34	XP_023183604.1(serine/arginine repetitive matrix protein 1-like [Xiphophorus maculatus])	None
TRINITY_DN23382_c0_g4	3.93363	8.61e-16	1.4e-14	yes	up	0.89	14.21	XP_006642710.1(PREDICTED: actin, aortic smooth muscle-like [Lepisosteus oculatus])	gi|2492671|sp|Q25381.1|ACTM_LYTPI(RecName: Full=Actin, muscle; AltName: Full=LPM)
TRINITY_DN34125_c0_g1	4.79209	8.85e-16	1.43e-14	yes	up	0.07	2.65	XP_013865736.1(PREDICTED: uncharacterized protein LOC106518859 [Austrofundulus limnaeus])	None
TRINITY_DN23358_c1_g2	1.64978	9.7e-16	1.57e-14	yes	up	4.55	14.64	None	None
TRINITY_DN46580_c0_g1	-7.10273	9.83e-16	1.59e-14	yes	down	13.13	0	None	None
TRINITY_DN36269_c0_g1	2.36359	1.01e-15	1.63e-14	yes	up	0.28	2.15	XP_016322707.1(PREDICTED: ATP-dependent 6-phosphofructokinase, muscle type-like [Sinocyclocheilus anshuiensis])	gi|122143188|sp|Q0IIG5.1|PFKAM_BOVIN(RecName: Full=ATP-dependent 6-phosphofructokinase, muscle type; Short=ATP-PFK; Short=PFK-M; AltName: Full=6-phosphofructokinase type A; AltName: Full=Phosphofructo-1-kinase isozyme A; Short=PFK-A; AltName: Full=Phosphohexokinase)
TRINITY_DN26630_c0_g3	1.43568	1.02e-15	1.65e-14	yes	up	24.24	23.9	XP_022541363.1(uncharacterized protein LOC111196389 [Astyanax mexicanus])	None
TRINITY_DN36130_c0_g2	1.19603	1.07e-15	1.73e-14	yes	up	7.89	14.84	XP_017545608.1(PREDICTED: HRAS-like suppressor 3 [Pygocentrus nattereri])	gi|20140910|sp|Q9UL19.1|HRSL4_HUMAN(RecName: Full=Retinoic acid receptor responder protein 3; AltName: Full=HRAS-like suppressor 4; Short=HRSL4; AltName: Full=RAR-responsive protein TIG3; AltName: Full=Retinoid-inducible gene 1 protein; AltName: Full=Tazarotene-induced gene 3 protein)
TRINITY_DN21023_c0_g2	-3.90419	1.08e-15	1.73e-14	yes	down	5.62	0.75	None	None
TRINITY_DN34689_c0_g1	-3.90419	1.08e-15	1.73e-14	yes	down	5.29	0.43	XP_018958639.1(PREDICTED: uncharacterized protein LOC109088956 [Cyprinus carpio])	None
TRINITY_DN30432_c1_g1	-1.14871	1.1e-15	1.77e-14	yes	down	12.86	6.09	None	None
TRINITY_DN31221_c0_g2	1.34021	1.11e-15	1.78e-14	yes	up	24.84	65.65	None	None
TRINITY_DN24770_c0_g1	3.6681	1.14e-15	1.84e-14	yes	up	0.08	2.69	XP_016342752.1(PREDICTED: stanniocalcin-like [Sinocyclocheilus anshuiensis])	gi|729223|sp|Q08264.1|STC_ONCKI(RecName: Full=Stanniocalcin; Short=STC; AltName: Full=Corpuscles of Stannius protein; Short=CS; AltName: Full=Hypocalcin; AltName: Full=Teleocalcin; Flags: Precursor)
TRINITY_DN26973_c2_g1	6.77071	1.2e-15	1.92e-14	yes	up	0	2.13	None	None
TRINITY_DN17960_c0_g1	-1.27325	1.2e-15	1.92e-14	yes	down	40.75	46.9	None	None
TRINITY_DN30673_c1_g2	-5.05026	1.24e-15	1.99e-14	yes	down	2.37	0.07	CDQ99147.1(unnamed protein product [Oncorhynchus mykiss])	None
TRINITY_DN45291_c1_g3	-2.88813	1.26e-15	2.02e-14	yes	down	10.21	1.58	None	None
TRINITY_DN22370_c1_g1	-2.68769	1.28e-15	2.04e-14	yes	down	4.01	0.55	XP_024135975.1(uncharacterized protein LOC112151342 [Oryzias melastigma])	None
TRINITY_DN42952_c0_g1	-1.99281	1.31e-15	2.09e-14	yes	down	10.76	0.6	XP_016407915.1(PREDICTED: leucine-rich repeat, immunoglobulin-like domain and transmembrane domain-containing protein 3 [Sinocyclocheilus rhinocerous])	gi|476007838|sp|Q3SXY7.3|LRIT3_HUMAN(RecName: Full=Leucine-rich repeat, immunoglobulin-like domain and transmembrane domain-containing protein 3; Flags: Precursor)
TRINITY_DN47763_c1_g2	-3.68769	1.34e-15	2.15e-14	yes	down	2.1	0.17	None	None
TRINITY_DN39850_c0_g2	1.01411	1.43e-15	2.28e-14	yes	up	15.82	33.46	None	None
TRINITY_DN46024_c0_g1	1.02474	1.44e-15	2.3e-14	yes	up	2.67	2.41	XP_016314155.1(PREDICTED: uncharacterized protein LOC107667070 [Sinocyclocheilus anshuiensis])	gi|693586055|sp|Q9NRC6.2|SPTN5_HUMAN(RecName: Full=Spectrin beta chain, non-erythrocytic 5; AltName: Full=Beta-V spectrin)
TRINITY_DN22434_c0_g1	-2.44222	1.48e-15	2.36e-14	yes	down	49.97	7.05	None	None
TRINITY_DN36483_c0_g1	-2.44222	1.48e-15	2.36e-14	yes	down	1.82	0.43	XP_016331338.1(PREDICTED: bicaudal D-related protein 1-like isoform X2 [Sinocyclocheilus anshuiensis])	gi|158512480|sp|A0JNT9.1|BICR1_MOUSE(RecName: Full=Bicaudal D-related protein 1; Short=BICD-related protein 1; Short=BICDR-1; AltName: Full=Coiled-coil domain-containing protein 64A)
TRINITY_DN21577_c0_g4	-2.44222	1.48e-15	2.36e-14	yes	down	6.83	1.32	None	None
TRINITY_DN25020_c0_g3	3.91408	1.49e-15	2.36e-14	yes	up	0.39	6.16	None	None
TRINITY_DN30096_c2_g4	4.77071	1.51e-15	2.4e-14	yes	up	0.02	0.7	XP_018928914.1(PREDICTED: uncharacterized protein LOC109056142 [Cyprinus carpio])	gi|60392921|sp|P11369.2|LORF2_MOUSE(RecName: Full=LINE-1 retrotransposable element ORF2 protein; Short=ORF2p; AltName: Full=Long interspersed element-1; Short=L1; AltName: Full=Retrovirus-related Pol polyprotein LINE-1; Includes: RecName: Full=Reverse transcriptase; Includes: RecName: Full=Endonuclease)
TRINITY_DN42232_c0_g1	-4.15336	1.64e-15	2.61e-14	yes	down	1.53	1.77	XP_018939250.1(PREDICTED: uncharacterized protein LOC109066664 isoform X1 [Cyprinus carpio])	None
TRINITY_DN35085_c0_g3	-7.07674	1.67e-15	2.65e-14	yes	down	1.26	0	ABF20550.1(transposase [Danio rerio])	gi|74710067|sp|Q6R2W3.1|SCND3_HUMAN(RecName: Full=SCAN domain-containing protein 3; AltName: Full=Transposon-derived Buster4 transposase-like protein; AltName: Full=Zinc finger BED domain-containing protein 9)
TRINITY_DN24046_c1_g1	-1.48345	1.71e-15	2.71e-14	yes	down	3.51	1.31	XP_019201078.1(PREDICTED: uncharacterized protein LOC106097162 [Oreochromis niloticus])	gi|130407|sp|P10394.1|POL4_DROME(RecName: Full=Retrovirus-related Pol polyprotein from transposon 412; Includes: RecName: Full=Protease; Includes: RecName: Full=Reverse transcriptase; Includes: RecName: Full=Endonuclease)
TRINITY_DN21939_c1_g1	3.65379	1.73e-15	2.74e-14	yes	up	2.01	10.93	None	None
TRINITY_DN19777_c0_g2	2.55262	1.75e-15	2.76e-14	yes	up	0.61	2.38	KTG34881.1(hypothetical protein cypCar_00032756 [Cyprinus carpio])	gi|5921191|sp|Q05722.2|CO9A1_MOUSE(RecName: Full=Collagen alpha-1(IX) chain; Flags: Precursor)
TRINITY_DN38273_c2_g1	-1.30198	1.82e-15	2.88e-14	yes	down	10.82	4.6	None	None
TRINITY_DN45890_c1_g1	-3.36147	1.89e-15	2.99e-14	yes	down	12.59	0.96	None	None
TRINITY_DN19924_c0_g1	-3.23398	2.13e-15	3.36e-14	yes	down	28.49	3.92	None	None
TRINITY_DN38305_c1_g1	-5.0233	2.36e-15	3.72e-14	yes	down	1.13	0.04	XP_016321282.1(PREDICTED: prolactin receptor-like isoform X1 [Sinocyclocheilus anshuiensis])	gi|2494726|sp|Q91513.1|PRLR_ORENI(RecName: Full=Prolactin receptor; Short=PRL-R; Flags: Precursor)
TRINITY_DN24802_c1_g1	-1.11368	2.39e-15	3.75e-14	yes	down	77.2	32.75	None	None
TRINITY_DN41204_c1_g3	-5.99582	2.53e-15	3.97e-14	yes	down	20.71	0.3	None	None
TRINITY_DN22542_c2_g2	-4.49177	2.55e-15	4e-14	yes	down	3.67	0.18	None	None
TRINITY_DN29725_c1_g1	-2.86172	2.57e-15	4.03e-14	yes	down	15.09	10.04	None	None
TRINITY_DN17227_c0_g1	-3.66461	2.6e-15	4.07e-14	yes	down	11.96	0.99	XP_016321142.1(PREDICTED: bromodomain-containing protein 4-like isoform X4 [Sinocyclocheilus anshuiensis])	gi|527525139|sp|F1R5H6.1|BRD4_DANRE(RecName: Full=Bromodomain-containing protein 4)
TRINITY_DN35513_c0_g1	1.20955	2.67e-15	4.18e-14	yes	up	1.1	2.67	KTG02278.1(hypothetical protein cypCar_00016315 [Cyprinus carpio])	gi|74750384|sp|Q86TH1.1|ATL2_HUMAN(RecName: Full=ADAMTS-like protein 2; Short=ADAMTSL-2; Flags: Precursor)
TRINITY_DN23493_c0_g1	-3.74467	2.73e-15	4.28e-14	yes	down	5.91	3.23	XP_018964209.1(PREDICTED: CD276 antigen homolog [Cyprinus carpio])	gi|74759262|sp|Q7Z7D3.1|VTCN1_HUMAN(RecName: Full=V-set domain-containing T-cell activation inhibitor 1; AltName: Full=B7 homolog 4; Short=B7-H4; AltName: Full=B7h.5; AltName: Full=Immune costimulatory protein B7-H4; AltName: Full=Protein B7S1; AltName: Full=T-cell costimulatory molecule B7x; Flags: Precursor)
TRINITY_DN47074_c1_g2	2.25482	2.8e-15	4.38e-14	yes	up	0.34	1.7	XP_016401783.1(PREDICTED: LOW QUALITY PROTEIN: unconventional myosin-XIX-like [Sinocyclocheilus rhinocerous])	gi|82178330|sp|Q569U0.1|MYO19_XENLA(RecName: Full=Unconventional myosin-XIX [Xenopus laevis])
TRINITY_DN25602_c3_g2	-7.05026	2.84e-15	4.44e-14	yes	down	2.72	0	CDQ60232.1(unnamed protein product [Oncorhynchus mykiss])	gi|74821373|sp|Q95SX7.1|RTBS_DROME(RecName: Full=Probable RNA-directed DNA polymerase from transposon BS; AltName: Full=Reverse transcriptase)
TRINITY_DN30457_c3_g1	-7.05026	2.84e-15	4.44e-14	yes	down	12.95	0	None	None
TRINITY_DN40489_c0_g3	-7.05026	2.84e-15	4.44e-14	yes	down	32.06	0	None	None
TRINITY_DN49119_c8_g1	-1.62135	2.88e-15	4.49e-14	yes	down	29.75	10.39	None	None
TRINITY_DN25459_c0_g4	-5.01264	3.04e-15	4.73e-14	yes	down	14.03	0.29	None	None
TRINITY_DN41518_c0_g1	1.10432	3.12e-15	4.86e-14	yes	up	13.05	57.34	KKF14879.1(putative AC9 transposase [Larimichthys crocea])	None
TRINITY_DN44810_c0_g4	-1.55317	3.17e-15	4.92e-14	yes	down	15.66	5.59	None	None
TRINITY_DN39568_c0_g5	-4.12827	3.19e-15	4.96e-14	yes	down	8.15	0.47	None	None
TRINITY_DN44573_c1_g2	-2.87882	3.22e-15	4.99e-14	yes	down	13.74	1.94	None	None
TRINITY_DN24485_c2_g3	4.22819	3.24e-15	5.03e-14	yes	up	0.25	5.42	NP_001007366.1(troponin I type 2a (skeletal, fast), tandem duplicate 1 [Danio rerio])	gi|401209|sp|P02643.3|TNNI2_RABIT(RecName: Full=Troponin I, fast skeletal muscle; AltName: Full=Troponin I, fast-twitch isoform)
TRINITY_DN26040_c0_g1	-1.88034	3.24e-15	5.03e-14	yes	down	3.1	0.93	XP_023656728.1(uncharacterized protein LOC111838211, partial [Paramormyrops kingsleyae])	None
TRINITY_DN22098_c2_g1	-1.40054	3.33e-15	5.15e-14	yes	down	76.94	34.17	None	None
TRINITY_DN27906_c0_g1	-2.21291	3.33e-15	5.16e-14	yes	down	5.64	3.05	XP_018931180.1(PREDICTED: uncharacterized protein LOC109058442 isoform X1 [Cyprinus carpio])	None
TRINITY_DN21617_c0_g4	-2.50688	3.34e-15	5.17e-14	yes	down	6.24	0.38	XP_016303695.1(PREDICTED: uncharacterized protein LOC107659315 [Sinocyclocheilus anshuiensis])	None
TRINITY_DN36160_c1_g3	-1.17462	3.6e-15	5.55e-14	yes	down	8.86	4.6	NP_001103943.1(immunoglobin superfamily, member 21b precursor [Danio rerio])	gi|74760871|sp|Q96ID5.1|IGS21_HUMAN(RecName: Full=Immunoglobulin superfamily member 21; Short=IgSF21; Flags: Precursor)
TRINITY_DN31054_c1_g1	1.06492	3.66e-15	5.66e-14	yes	up	3.64	4.87	XP_023861469.1(collagen alpha-3(IX) chain [Salvelinus alpinus])	gi|399164|sp|P32017.1|CO9A3_CHICK(RecName: Full=Collagen alpha-3(IX) chain; Flags: Precursor)
TRINITY_DN19718_c0_g1	2.90626	3.68e-15	5.67e-14	yes	up	0.79	4.71	XP_018927395.1(PREDICTED: LOW QUALITY PROTEIN: BRICHOS domain-containing protein 5 [Cyprinus carpio])	gi|308153611|sp|Q6PL45.3|BRID5_HUMAN(RecName: Full=BRICHOS domain-containing protein 5)
TRINITY_DN30982_c1_g2	-1.0467	3.83e-15	5.89e-14	yes	down	7.07	3.57	XP_022519890.1(uncharacterized protein LOC111190408 [Astyanax mexicanus])	gi|29839633|sp|Q9H0W7.1|THAP2_HUMAN(RecName: Full=THAP domain-containing protein 2)
TRINITY_DN38751_c0_g1	1.86074	3.84e-15	5.9e-14	yes	up	4.85	12.75	None	None
TRINITY_DN29056_c0_g3	-1.54844	4.04e-15	6.21e-14	yes	down	15.71	6.24	None	None
TRINITY_DN21122_c0_g2	-3.21291	4.06e-15	6.23e-14	yes	down	70.48	8.75	None	None
TRINITY_DN24486_c0_g1	-3.21291	4.06e-15	6.23e-14	yes	down	4.88	1.06	None	None
TRINITY_DN41916_c0_g3	-3.21291	4.06e-15	6.23e-14	yes	down	1.89	0.21	XP_020381069.1(LOW QUALITY PROTEIN: uncharacterized protein LOC109925543 [Rhincodon typus])	gi|300669716|sp|P03355.4|POL_MLVMS(RecName: Full=Gag-Pol polyprotein; Short=Pr180gag-pol; Contains: RecName: Full=Matrix protein p15; Short=MA; Contains: RecName: Full=RNA-binding phosphoprotein p12; AltName: Full=pp12; Contains: RecName: Full=Capsid protein p30; Short=CA; Contains: RecName: Full=Nucleocapsid protein p10; Short=NC-pol; Contains: RecName: Full=Protease p14; Short=PR; Contains: Rec…
TRINITY_DN41730_c1_g2	1.13758	4.16e-15	6.38e-14	yes	up	6.29	14.62	XP_016373261.1(PREDICTED: UPF0583 protein C15orf59 homolog [Sinocyclocheilus rhinocerous])	gi|82179655|sp|Q5PQ25.1|CO059_XENLA(RecName: Full=UPF0583 protein C15orf59 homolog [Xenopus laevis])
TRINITY_DN34111_c0_g1	1.31377	4.26e-15	6.53e-14	yes	up	29.54	56.82	None	None
TRINITY_DN28024_c2_g3	-1.6035	4.3e-15	6.59e-14	yes	down	38.55	12.46	None	None
TRINITY_DN21184_c1_g1	-4.99582	4.51e-15	6.89e-14	yes	down	2.64	0.08	None	None
TRINITY_DN49013_c2_g1	2.52565	4.6e-15	7.02e-14	yes	up	1.56	8.35	None	None
TRINITY_DN38088_c1_g3	-7.02438	4.75e-15	7.24e-14	yes	down	9.57	0	None	None
TRINITY_DN24980_c1_g3	-7.0233	4.85e-15	7.39e-14	yes	down	3.6	0	XP_018947372.1(PREDICTED: retinal cone rhodopsin-sensitive cGMP 3',5'-cyclic phosphodiesterase subunit gamma-like [Cyprinus carpio])	gi|2833249|sp|Q13956.1|CNCG_HUMAN(RecName: Full=Retinal cone rhodopsin-sensitive cGMP 3',5'-cyclic phosphodiesterase subunit gamma; Short=GMP-PDE gamma)
TRINITY_DN35651_c0_g1	2.61414	4.92e-15	7.48e-14	yes	up	0.59	3.82	None	None
TRINITY_DN20470_c0_g1	1.85453	5.06e-15	7.68e-14	yes	up	22.45	83.58	None	None
TRINITY_DN48564_c1_g1	-2.26758	5.11e-15	7.75e-14	yes	down	10.57	1.43	None	None
TRINITY_DN36614_c0_g2	1.39889	5.14e-15	7.79e-14	yes	up	1.78	4.93	XP_016367298.1(PREDICTED: UDP-GlcNAc:betaGal beta-1,3-N-acetylglucosaminyltransferase-like protein 1 [Sinocyclocheilus rhinocerous])	gi|123796900|sp|Q3U129.1|B3GNL_MOUSE(RecName: Full=UDP-GlcNAc:betaGal beta-1,3-N-acetylglucosaminyltransferase-like protein 1; Short=BGnT-like protein 1; Short=Beta1,3-N-acetylglucosaminyltransferase-like protein 1; Short=Beta3Gn-T-like protein 1; Short=Beta3GnTL1)
TRINITY_DN38089_c0_g1	1.00645	5.51e-15	8.35e-14	yes	up	6.38	9.43	XP_016417710.1(PREDICTED: gliomedin isoform X1 [Sinocyclocheilus rhinocerous])	gi|81874292|sp|Q8BMF8.1|GLDN_MOUSE(RecName: Full=Gliomedin; AltName: Full=Cancer-related gene liver 2 protein; Short=CRG-L2; Contains: RecName: Full=Gliomedin shedded ectodomain; Flags: Precursor)
TRINITY_DN24666_c1_g1	-3.84283	5.8e-15	8.78e-14	yes	down	14.45	1.05	None	None
TRINITY_DN48987_c6_g1	-1.70076	5.9e-15	8.92e-14	yes	down	15.3	6.31	None	None
TRINITY_DN27415_c1_g2	2.99413	5.93e-15	8.96e-14	yes	up	0.36	3.03	None	None
TRINITY_DN24869_c2_g3	5.65882	6.04e-15	9.12e-14	yes	up	0.02	1.24	XP_017295490.1(PREDICTED: uncharacterized protein LOC108250224 isoform X1 [Kryptolebias marmoratus])	None
TRINITY_DN48064_c2_g3	-2.99612	6.14e-15	9.26e-14	yes	down	10.96	1.27	None	None
TRINITY_DN45714_c2_g1	-4.10273	6.2e-15	9.34e-14	yes	down	33.01	0.85	None	None
TRINITY_DN31824_c0_g1	-3.63356	6.2e-15	9.34e-14	yes	down	58.93	2.79	None	None
TRINITY_DN38049_c0_g2	-4.10273	6.2e-15	9.34e-14	yes	down	5.9	0.3	None	None
TRINITY_DN18766_c0_g1	-1.13783	6.63e-15	9.97e-14	yes	down	10.93	5.21	XP_016414574.1(PREDICTED: protein lin-37 homolog [Sinocyclocheilus rhinocerous])	gi|81905672|sp|Q9D8N6.1|LIN37_MOUSE(RecName: Full=Protein lin-37 homolog; AltName: Full=Antolefinin; AltName: Full=Antolefinine)
TRINITY_DN19854_c1_g2	-3.83237	6.78e-15	1.02e-13	yes	down	115.91	8.01	ABQ59678.1(vacuolar protein sorting 52 [Salmo salar])	None
TRINITY_DN23826_c1_g1	-2.58486	6.82e-15	1.02e-13	yes	down	31.08	5.67	None	None
TRINITY_DN26733_c0_g1	-2.32903	6.84e-15	1.03e-13	yes	down	17.15	7.15	None	None
TRINITY_DN28214_c3_g1	-2.22429	6.94e-15	1.04e-13	yes	down	0.94	0.21	XP_019210590.1(PREDICTED: uncharacterized protein K02A2.6-like [Oreochromis niloticus])	gi|146291076|sp|Q7LHG5.2|YI31B_YEAST(RecName: Full=Transposon Ty3-I Gag-Pol polyprotein; AltName: Full=Gag3-Pol3; AltName: Full=Transposon Ty3-2 TYA-TYB polyprotein; Contains: RecName: Full=Capsid protein; Short=CA; AltName: Full=p24; Contains: RecName: Full=Spacer peptide p3; Contains: RecName: Full=Nucleocapsid protein p11; Short=NC; Contains: RecName: Full=Ty3 protease; Short=PR; AltName: Full…
TRINITY_DN41206_c1_g1	3.40506	7.1e-15	1.06e-13	yes	up	0.18	1.95	XP_016086182.1(PREDICTED: voltage-dependent L-type calcium channel subunit alpha-1D-like isoform X6 [Sinocyclocheilus grahami])	gi|6165983|sp|O73700.1|CAC1D_CHICK(RecName: Full=Voltage-dependent L-type calcium channel subunit alpha-1D; AltName: Full=CHCACHA1D; AltName: Full=Voltage-gated calcium channel subunit alpha Cav1.3)
TRINITY_DN38690_c1_g1	-2.6961	7.33e-15	1.1e-13	yes	down	10.1	2.06	XP_005450692.1(PREDICTED: uncharacterized protein C14orf93 homolog [Oreochromis niloticus])	None
TRINITY_DN24546_c1_g1	-1.96116	7.41e-15	1.11e-13	yes	down	64.46	10.85	None	None
TRINITY_DN46395_c2_g5	-3.19154	7.73e-15	1.15e-13	yes	down	2.18	0.25	XP_013856187.1(PREDICTED: P2X purinoceptor 7-like [Austrofundulus limnaeus])	gi|395398617|sp|Q99572.4|P2RX7_HUMAN(RecName: Full=P2X purinoceptor 7; Short=P2X7; AltName: Full=ATP receptor; AltName: Full=P2Z receptor; AltName: Full=Purinergic receptor)
TRINITY_DN49113_c9_g1	-2.08265	8.04e-15	1.2e-13	yes	down	0.62	0.15	XP_016424023.1(PREDICTED: breast cancer type 2 susceptibility protein homolog isoform X1 [Sinocyclocheilus rhinocerous])	gi|952011477|sp|P51587.3|BRCA2_HUMAN(RecName: Full=Breast cancer type 2 susceptibility protein; AltName: Full=Fanconi anemia group D1 protein)
TRINITY_DN24279_c0_g1	-6.99582	8.3e-15	1.23e-13	yes	down	2.81	0	XP_016346660.1(PREDICTED: uncharacterized protein LOC107692211 [Sinocyclocheilus anshuiensis])	gi|395398617|sp|Q99572.4|P2RX7_HUMAN(RecName: Full=P2X purinoceptor 7; Short=P2X7; AltName: Full=ATP receptor; AltName: Full=P2Z receptor; AltName: Full=Purinergic receptor)
TRINITY_DN27806_c1_g1	-6.99582	8.3e-15	1.23e-13	yes	down	21.29	0	None	None
TRINITY_DN47694_c0_g1	-6.99582	8.3e-15	1.23e-13	yes	down	6.82	0	XP_005171742.2(uncharacterized protein LOC108179089 isoform X1 [Danio rerio])	None
TRINITY_DN42405_c0_g1	-5.93923	8.42e-15	1.25e-13	yes	down	3.39	0.05	XP_016392482.1(PREDICTED: polycystic kidney disease protein 1-like 1 [Sinocyclocheilus rhinocerous])	gi|586908221|sp|E7FKV8.2|PK1L1_ORYLA(RecName: Full=Polycystic kidney disease 1 like 1; AltName: Full=Protein abecobe)
TRINITY_DN36830_c0_g1	-2.39491	8.5e-15	1.26e-13	yes	down	5.78	0.75	None	None
TRINITY_DN34809_c0_g1	-2.75481	8.7e-15	1.29e-13	yes	down	3.98	0.48	XP_016398533.1(PREDICTED: uncharacterized protein LOC107731850 [Sinocyclocheilus rhinocerous])	None
TRINITY_DN46651_c1_g5	-2.75481	8.7e-15	1.29e-13	yes	down	5.02	0.78	None	None
TRINITY_DN48547_c3_g1	-2.75481	8.7e-15	1.29e-13	yes	down	12.78	1.98	None	None
TRINITY_DN34982_c1_g1	-1.89231	8.75e-15	1.3e-13	yes	down	11.36	2.55	None	None
TRINITY_DN28967_c0_g1	-2.82376	8.91e-15	1.32e-13	yes	down	11.48	1.42	None	None
TRINITY_DN22852_c0_g1	2.18771	8.91e-15	1.32e-13	yes	up	0.59	2.83	XP_020473135.1(zinc finger BED domain-containing protein 1-like [Monopterus albus])	gi|41018380|sp|O96006.1|ZBED1_HUMAN(RecName: Full=Zinc finger BED domain-containing protein 1; AltName: Full=Putative Ac-like transposable element; AltName: Full=dREF homolog)
TRINITY_DN22718_c1_g1	-3.6173	9.71e-15	1.43e-13	yes	down	1.27	0.11	XP_019206216.1(PREDICTED: G2/M phase-specific E3 ubiquitin-protein ligase isoform X1 [Oreochromis niloticus])	gi|114149932|sp|Q4R9C4.2|G2E3_MACFA(RecName: Full=G2/M phase-specific E3 ubiquitin-protein ligase)
TRINITY_DN36204_c0_g1	-3.6173	9.71e-15	1.43e-13	yes	down	11.51	0.76	None	None
TRINITY_DN30888_c1_g5	2.78435	1.01e-14	1.49e-13	yes	up	0.21	1.53	XP_019210590.1(PREDICTED: uncharacterized protein K02A2.6-like [Oreochromis niloticus])	gi|130398|sp|P20825.1|POL2_DROME(RecName: Full=Retrovirus-related Pol polyprotein from transposon 297; Includes: RecName: Full=Protease; Includes: RecName: Full=Reverse transcriptase; Includes: RecName: Full=Endonuclease)
TRINITY_DN22156_c1_g1	-2.83469	1.03e-14	1.52e-13	yes	down	64.14	11.65	None	None
TRINITY_DN33884_c2_g1	1.23806	1.04e-14	1.52e-13	yes	up	6.89	14.26	None	None
TRINITY_DN29918_c1_g1	1.40988	1.04e-14	1.54e-13	yes	up	5.24	10	None	None
TRINITY_DN30478_c0_g1	-1.63707	1.07e-14	1.58e-13	yes	down	3.49	1.15	XP_016409413.1(PREDICTED: forkhead box protein N4 [Sinocyclocheilus rhinocerous])	gi|635552445|sp|A2BGM5.1|FOXN4_DANRE(RecName: Full=Forkhead box protein N4)
TRINITY_DN20704_c0_g1	3.58766	1.11e-14	1.63e-13	yes	up	2.28	32.82	None	None
TRINITY_DN48415_c3_g2	1.78718	1.14e-14	1.67e-13	yes	up	14.13	41	None	None
TRINITY_DN27522_c2_g3	6.65882	1.15e-14	1.69e-13	yes	up	0	1.59	XP_021323961.1(uncharacterized protein si:dkey-3n22.9 [Danio rerio])	None
TRINITY_DN47412_c0_g1	1.21482	1.19e-14	1.75e-13	yes	up	5.24	15.1	None	None
TRINITY_DN23753_c0_g1	-4.07674	1.2e-14	1.76e-13	yes	down	6.67	0.46	KTF94839.1(hypothetical protein cypCar_00027619 [Cyprinus carpio])	gi|206558236|sp|A3KP85.2|ETKMT_DANRE(RecName: Full=Electron transfer flavoprotein beta subunit lysine methyltransferase; AltName: Full=ETFB lysine methyltransferase; Short=ETFB-KMT; AltName: Full=Protein N-lysine methyltransferase METTL20; Flags: Precursor)
TRINITY_DN47977_c3_g1	-2.51777	1.21e-14	1.76e-13	yes	down	3.96	0.79	XP_018932636.1(PREDICTED: kinetochore protein Spc24 [Cyprinus carpio])	gi|115311865|sp|Q503N2.2|SPC24_DANRE(RecName: Full=Kinetochore protein Spc24)
TRINITY_DN22074_c0_g1	-1.23237	1.3e-14	1.9e-13	yes	down	6.28	2.8	NP_001082891.1(uncharacterized protein LOC569005 [Danio rerio])	gi|81889002|sp|Q5HZI2.1|C2C4C_MOUSE(RecName: Full=C2 calcium-dependent domain-containing protein 4C; AltName: Full=Nuclear-localized factor 3; AltName: Full=Protein FAM148C)
TRINITY_DN22828_c0_g1	-2.56547	1.33e-14	1.93e-13	yes	down	166.44	25.42	XP_021172948.1(peptidyl-tRNA hydrolase ICT1, mitochondrial isoform X1 [Fundulus heteroclitus])	None
TRINITY_DN46761_c1_g2	-3.29538	1.33e-14	1.93e-13	yes	down	4.94	0.61	None	None
TRINITY_DN21500_c0_g2	-1.91781	1.41e-14	2.05e-13	yes	down	1.47	1.07	XP_023814023.1(uncharacterized protein K02A2.6-like [Oryzias latipes])	gi|558446103|sp|P0CT41.1|TF212_SCHPO(RecName: Full=Transposon Tf2-12 polyprotein; AltName: Full=Retrotransposable element Tf2 155 kDa protein >gi|558446110|sp|P0CT36.1|TF23_SCHPO RecName: Full=Transposon Tf2-3 polyprotein; AltName: Full=Retrotransposable element Tf2 155 kDa protein >gi|558446114|sp|P0CT38.1|TF25_SCHPO RecName: Full=Transposon Tf2-5 polyprotein; AltName: Full=Retrotransposable ele…
TRINITY_DN35591_c0_g2	-6.9678	1.42e-14	2.07e-13	yes	down	1.44	0	None	None
TRINITY_DN36934_c1_g2	-6.9678	1.42e-14	2.07e-13	yes	down	20.59	0	None	None
TRINITY_DN47891_c1_g1	-6.9678	1.42e-14	2.07e-13	yes	down	40.06	0	None	None
TRINITY_DN21812_c0_g1	-1.07447	1.45e-14	2.1e-13	yes	down	13.35	8.54	XP_016134083.1(PREDICTED: epithelial cell adhesion molecule [Sinocyclocheilus grahami])	gi|160113102|sp|P09758.3|TACD2_HUMAN(RecName: Full=Tumor-associated calcium signal transducer 2; AltName: Full=Cell surface glycoprotein Trop-2; AltName: Full=Membrane component chromosome 1 surface marker 1; AltName: Full=Pancreatic carcinoma marker protein GA733-1; Flags: Precursor)
TRINITY_DN26814_c1_g3	-2.6164	1.45e-14	2.1e-13	yes	down	3.91	1.56	XP_020791795.1(collagen alpha-1(IX) chain-like [Boleophthalmus pectinirostris])	None
TRINITY_DN25868_c1_g1	-1.48926	1.47e-14	2.13e-13	yes	down	47.46	24.66	None	None
TRINITY_DN15972_c0_g1	-3.80634	1.53e-14	2.21e-13	yes	down	1.07	0.08	XP_018964140.1(PREDICTED: uncharacterized protein LOC109094915 [Cyprinus carpio])	gi|38258172|sp|Q8I7P9.1|POL5_DROME(RecName: Full=Retrovirus-related Pol polyprotein from transposon opus; Includes: RecName: Full=Protease; Includes: RecName: Full=Reverse transcriptase; Includes: RecName: Full=Endonuclease)
TRINITY_DN24916_c0_g1	3.07966	1.56e-14	2.26e-13	yes	up	0.95	8.39	None	None
TRINITY_DN23430_c0_g1	2.3903	1.6e-14	2.32e-13	yes	up	19.82	93.82	None	None
TRINITY_DN29031_c0_g1	5.61151	1.66e-14	2.39e-13	yes	up	0.37	10.37	XP_017574830.1(PREDICTED: myosin heavy chain, fast skeletal muscle-like [Pygocentrus nattereri])	gi|13431711|sp|Q90339.2|MYSS_CYPCA(RecName: Full=Myosin heavy chain, fast skeletal muscle)
TRINITY_DN46324_c0_g1	-2.88034	1.67e-14	2.41e-13	yes	down	10.19	2.14	None	None
TRINITY_DN48119_c4_g1	-1.62377	1.7e-14	2.45e-13	yes	down	21.11	9.78	None	None
TRINITY_DN33631_c0_g1	1.76958	1.76e-14	2.54e-13	yes	up	1.57	8.72	XP_016380406.1(PREDICTED: laforin-like [Sinocyclocheilus rhinocerous])	gi|122134326|sp|Q1M199.1|EPM2A_CANFA(RecName: Full=Laforin; AltName: Full=Glucan phosphatase; AltName: Full=Lafora PTPase; Short=LAFPTPase)
TRINITY_DN46898_c1_g1	-4.41085	1.85e-14	2.67e-13	yes	down	11.41	0.14	None	None
TRINITY_DN35982_c0_g2	-1.82331	1.91e-14	2.75e-13	yes	down	3.52	1.21	XP_018962967.1(PREDICTED: G2/M phase-specific E3 ubiquitin-protein ligase-like [Cyprinus carpio])	gi|114149932|sp|Q4R9C4.2|G2E3_MACFA(RecName: Full=G2/M phase-specific E3 ubiquitin-protein ligase)
TRINITY_DN41702_c0_g3	1.22753	1.93e-14	2.78e-13	yes	up	4.24	11.06	None	None
TRINITY_DN26842_c0_g1	2.48423	1.95e-14	2.81e-13	yes	up	0.09	0.55	XP_021322653.1(uncharacterized protein LOC110437994 [Danio rerio])	None
TRINITY_DN31777_c0_g1	2.32911	1.98e-14	2.84e-13	yes	up	1.42	3.72	XP_016307648.1(PREDICTED: uncharacterized protein LOC107662224 [Sinocyclocheilus anshuiensis])	None
TRINITY_DN27131_c1_g4	-2.29538	2e-14	2.88e-13	yes	down	1.43	1.57	XP_023666599.1(uncharacterized protein LOC111843331 isoform X3 [Paramormyrops kingsleyae])	gi|82075465|sp|Q5F4A1.1|G2E3_CHICK(RecName: Full=G2/M phase-specific E3 ubiquitin-protein ligase)
TRINITY_DN21294_c1_g2	1.40422	2.15e-14	3.08e-13	yes	up	32.58	79.9	None	None
TRINITY_DN47492_c1_g1	-2.50049	2.18e-14	3.12e-13	yes	down	33.34	6.64	None	None
TRINITY_DN44232_c1_g1	-1.4978	2.19e-14	3.14e-13	yes	down	24.14	3.54	None	None
TRINITY_DN36192_c1_g1	2.54113	2.2e-14	3.14e-13	yes	up	0.51	5.44	XP_001920106.1(natterin-like protein [Danio rerio])	gi|82178790|sp|Q5CZR5.1|NATTL_DANRE(RecName: Full=Natterin-like protein)
TRINITY_DN32378_c0_g2	-1.45684	2.3e-14	3.28e-13	yes	down	38.52	17.52	XP_018946919.1(PREDICTED: heat shock protein beta-1-like [Cyprinus carpio])	gi|75062102|sp|Q5S1U1.1|HSPB1_PIG(RecName: Full=Heat shock protein beta-1; Short=HspB1; AltName: Full=Heat shock 27 kDa protein; Short=HSP 27)
TRINITY_DN18540_c0_g1	-4.05026	2.34e-14	3.34e-13	yes	down	1.35	0.09	XP_021323131.1(uncharacterized protein LOC110438047 [Danio rerio])	gi|130407|sp|P10394.1|POL4_DROME(RecName: Full=Retrovirus-related Pol polyprotein from transposon 412; Includes: RecName: Full=Protease; Includes: RecName: Full=Reverse transcriptase; Includes: RecName: Full=Endonuclease)
TRINITY_DN35841_c0_g2	1.03466	2.36e-14	3.36e-13	yes	up	9.67	12.51	KTF74569.1(hypothetical protein cypCar_00008504 [Cyprinus carpio])	gi|3023580|sp|O19113.1|CTGF_PIG(RecName: Full=Connective tissue growth factor; AltName: Full=CCN family member 2; Flags: Precursor)
TRINITY_DN48940_c3_g2	-1.23098	2.37e-14	3.37e-13	yes	down	54.78	33.92	None	None
TRINITY_DN35904_c2_g1	-1.15896	2.38e-14	3.38e-13	yes	down	5.04	2.34	XP_017560702.1(PREDICTED: kinesin heavy chain isoform X1 [Pygocentrus nattereri])	gi|143811412|sp|Q12840.2|KIF5A_HUMAN(RecName: Full=Kinesin heavy chain isoform 5A; AltName: Full=Kinesin heavy chain neuron-specific 1; AltName: Full=Neuronal kinesin heavy chain; Short=NKHC)
TRINITY_DN49201_c5_g2	-4.04666	2.38e-14	3.38e-13	yes	down	9.24	0.66	None	None
TRINITY_DN46512_c2_g2	-1.86827	2.42e-14	3.45e-13	yes	down	22.92	15.58	None	None
TRINITY_DN26136_c0_g5	-6.93923	2.44e-14	3.47e-13	yes	down	9.7	0	XP_016349583.1(PREDICTED: uncharacterized protein LOC107694407 [Sinocyclocheilus anshuiensis])	None
TRINITY_DN31043_c6_g3	-6.93923	2.44e-14	3.47e-13	yes	down	3.72	0	None	None
TRINITY_DN17759_c0_g1	-1.44339	2.46e-14	3.49e-13	yes	down	15.99	9.16	XP_016429365.1(PREDICTED: transmembrane protein 87A-like isoform X1 [Sinocyclocheilus rhinocerous])	gi|121957111|sp|Q28EW0.1|TM87A_XENTR(RecName: Full=Transmembrane protein 87A; Flags: Precursor)
TRINITY_DN23363_c2_g1	-2.04582	2.54e-14	3.59e-13	yes	down	35.92	15.73	XP_016134050.1(PREDICTED: probable ubiquitin-conjugating enzyme E2 W-B [Sinocyclocheilus grahami])	None
TRINITY_DN48889_c1_g1	-2.59916	2.62e-14	3.71e-13	yes	down	3.85	2.06	None	None
TRINITY_DN21494_c1_g2	3.14011	2.68e-14	3.79e-13	yes	up	4.63	38.72	None	None
TRINITY_DN28020_c2_g1	-2.65527	2.81e-14	3.97e-13	yes	down	2.51	0.34	XP_016323634.1(PREDICTED: protein Dok-7-like [Sinocyclocheilus anshuiensis])	gi|115311706|sp|Q18PE0.1|DOK7_MOUSE(RecName: Full=Protein Dok-7; AltName: Full=Downstream of tyrosine kinase 7)
TRINITY_DN32061_c0_g1	4.14203	2.82e-14	3.98e-13	yes	up	0.33	4.21	None	None
TRINITY_DN20183_c1_g1	3.80329	2.85e-14	4.02e-13	yes	up	0.08	3.66	XP_018939185.1(PREDICTED: uncharacterized protein LOC109066608 [Cyprinus carpio])	None
TRINITY_DN30999_c0_g1	3.55262	2.86e-14	4.03e-13	yes	up	2.1	22.48	XP_010764852.1(PREDICTED: uncharacterized protein LOC104941448 [Notothenia coriiceps])	None
TRINITY_DN37438_c2_g1	1.16598	2.95e-14	4.15e-13	yes	up	0.82	1.93	XP_016328027.1(PREDICTED: collagen alpha-2(V) chain-like [Sinocyclocheilus anshuiensis])	gi|115286|sp|P02460.1|CO2A1_CHICK(RecName: Full=Collagen alpha-1(II) chain; AltName: Full=Alpha-1 type II collagen; Flags: Precursor)
TRINITY_DN43539_c1_g1	1.94494	2.96e-14	4.16e-13	yes	up	15.86	58.46	None	None
TRINITY_DN24695_c0_g1	-2.78476	3.07e-14	4.32e-13	yes	down	7.12	0.3	XP_023811126.1(zinc finger BED domain-containing protein 4-like isoform X1 [Oryzias latipes])	gi|136140|sp|P03010.1|TRAC9_MAIZE(RecName: Full=Putative AC9 transposase)
TRINITY_DN34428_c2_g3	3.13805	3.08e-14	4.33e-13	yes	up	0.96	15.6	None	None
TRINITY_DN19538_c0_g1	-2.86016	3.11e-14	4.37e-13	yes	down	5.32	0.77	None	None
TRINITY_DN24217_c2_g2	1.56177	3.28e-14	4.6e-13	yes	up	17.88	34.02	XP_018959177.1(PREDICTED: transcription factor Adf-1-like, partial [Cyprinus carpio])	None
TRINITY_DN25710_c2_g1	2.08545	3.34e-14	4.68e-13	yes	up	0.19	0.85	XP_024122537.1(uncharacterized protein LOC112143031 [Oryzias melastigma])	gi|141475|sp|P14381.1|YTX2_XENLA(RecName: Full=Transposon TX1 uncharacterized 149 kDa protein; AltName: Full=ORF 2)
TRINITY_DN20657_c0_g1	-1.03739	3.43e-14	4.8e-13	yes	down	6.72	3.43	AAI62156.1(Zgc:171531 [Danio rerio])	gi|27923816|sp|Q9EQM3.2|NKX24_MOUSE(RecName: Full=Homeobox protein Nkx-2.4; AltName: Full=Homeobox protein NK-2 homolog D)
TRINITY_DN20394_c2_g1	-6.91918	3.55e-14	4.96e-13	yes	down	9.49	0	None	None
TRINITY_DN21332_c1_g3	-4.38284	3.6e-14	5.03e-13	yes	down	0.89	0.04	XP_016384652.1(PREDICTED: uncharacterized protein LOC107721237 [Sinocyclocheilus rhinocerous])	gi|134083|sp|P21328.1|RTJK_DROME(RecName: Full=RNA-directed DNA polymerase from mobile element jockey; AltName: Full=Reverse transcriptase)
TRINITY_DN44055_c4_g2	4.63536	3.72e-14	5.2e-13	yes	up	0.09	2.3	XP_016118645.1(PREDICTED: GTPase IMAP family member 7-like, partial [Sinocyclocheilus grahami])	gi|38372381|sp|Q96F15.1|GIMA5_HUMAN(RecName: Full=GTPase IMAP family member 5; AltName: Full=Immunity-associated nucleotide 4-like 1 protein; AltName: Full=Immunity-associated nucleotide 5 protein; Short=IAN-5; Short=hIAN5; AltName: Full=Immunity-associated protein 3)
TRINITY_DN32378_c0_g1	-2.31168	4.14e-14	5.76e-13	yes	down	16.54	3.26	NP_001092202.1(heat shock protein, alpha-crystallin-related, b15 [Danio rerio])	None
TRINITY_DN43167_c0_g3	-6.91009	4.2e-14	5.84e-13	yes	down	27.25	0	None	None
TRINITY_DN44815_c0_g2	-6.91009	4.2e-14	5.84e-13	yes	down	0.84	0	AAQ18217.1(Ran-binding protein 7, partial [Danio rerio])	gi|45476775|sp|O95373.1|IPO7_HUMAN(RecName: Full=Importin-7; Short=Imp7; AltName: Full=Ran-binding protein 7; Short=RanBP7)
TRINITY_DN35392_c1_g3	-2.20611	4.41e-14	6.14e-13	yes	down	1.8	0.41	XP_018928656.1(PREDICTED: uncharacterized protein LOC109055923 [Cyprinus carpio])	gi|338819284|sp|O92815.2|POL_WDSV(RecName: Full=Gag-Pol polyprotein; Contains: RecName: Full=Matrix protein p10; Short=MA; Contains: RecName: Full=p20; Contains: RecName: Full=Capsid protein p25; Short=CA; Contains: RecName: Full=Nucleocapsid protein p14; Short=NC-pol; Contains: RecName: Full=Protease p15; Short=PR; Contains: RecName: Full=Reverse transcriptase/ribonuclease H p90; Short=RT; Conta…
TRINITY_DN21313_c3_g1	6.58727	4.55e-14	6.32e-13	yes	up	0	1.85	KTF86191.1(hypothetical protein cypCar_00048066 [Cyprinus carpio])	gi|152031712|sp|P11260.2|LORF1_MOUSE(RecName: Full=LINE-1 retrotransposable element ORF1 protein; Short=L1ORF1p; AltName: Full=LINE retrotransposable element 1; AltName: Full=LINE1 retrotransposable element 1; AltName: Full=Transposase element L1Md-A101/L1Md-A102/L1Md-A2)
TRINITY_DN22620_c0_g1	6.58727	4.55e-14	6.32e-13	yes	up	0	2.49	XP_016427939.1(PREDICTED: sarcoplasmic/endoplasmic reticulum calcium ATPase 1-like isoform X1 [Sinocyclocheilus rhinocerous])	gi|9789714|sp|Q64578.1|AT2A1_RAT(RecName: Full=Sarcoplasmic/endoplasmic reticulum calcium ATPase 1; Short=SERCA1; Short=SR Ca(2+)-ATPase 1; AltName: Full=Calcium pump 1; AltName: Full=Calcium-transporting ATPase sarcoplasmic reticulum type, fast twitch skeletal muscle isoform; AltName: Full=Endoplasmic reticulum class 1/2 Ca(2+) ATPase)
TRINITY_DN21231_c1_g1	5.56012	4.81e-14	6.66e-13	yes	up	0.16	6.76	None	None
TRINITY_DN35620_c4_g1	1.48467	5.36e-14	7.39e-13	yes	up	8.93	19.33	None	None
TRINITY_DN32807_c0_g1	1.27231	5.52e-14	7.61e-13	yes	up	4.71	12.88	XP_016426538.1(PREDICTED: calpain-15-like [Sinocyclocheilus rhinocerous])	None
TRINITY_DN27891_c0_g2	1.53129	5.55e-14	7.65e-13	yes	up	0.49	1.49	XP_023660029.1(uncharacterized protein K02A2.6-like [Paramormyrops kingsleyae])	gi|1353154|sp|Q09575.1|YRD6_CAEEL(RecName: Full=Uncharacterized protein K02A2.6)
TRINITY_DN30999_c0_g3	-3.01784	5.62e-14	7.74e-13	yes	down	2.57	0.33	XP_020779270.1(uncharacterized protein LOC110159045 [Boleophthalmus pectinirostris])	None
TRINITY_DN43056_c0_g4	1.98316	5.67e-14	7.8e-13	yes	up	3.06	13.62	XP_016394695.1(PREDICTED: cyclin-A1 isoform X2 [Sinocyclocheilus rhinocerous])	gi|2494006|sp|Q92161.1|CCNA1_CARAU(RecName: Full=Cyclin-A1; Short=Cyclin-A)
TRINITY_DN32321_c1_g2	-1.4951	5.77e-14	7.93e-13	yes	down	12.62	4.66	None	None
TRINITY_DN21003_c0_g2	-2.92341	5.78e-14	7.94e-13	yes	down	13.66	1.88	None	None
TRINITY_DN28455_c4_g2	-2.92341	5.78e-14	7.94e-13	yes	down	7.4	1.02	None	None
TRINITY_DN28069_c0_g1	-2.8397	5.8e-14	7.96e-13	yes	down	4.45	0.63	XP_019206713.1(PREDICTED: uncharacterized protein LOC109196774 [Oreochromis niloticus])	None
TRINITY_DN32258_c2_g5	2.34508	5.99e-14	8.22e-13	yes	up	0.3	1.62	XP_017539894.1(PREDICTED: uncharacterized protein K02A2.6-like [Pygocentrus nattereri])	gi|558446106|sp|P0CT34.1|TF21_SCHPO(RecName: Full=Transposon Tf2-1 polyprotein; AltName: Full=Retrotransposable element Tf2 155 kDa protein >gi|558446108|sp|P0CT35.1|TF22_SCHPO RecName: Full=Transposon Tf2-2 polyprotein; AltName: Full=Retrotransposable element Tf2 155 kDa protein >gi|558446112|sp|P0CT37.1|TF24_SCHPO RecName: Full=Transposon Tf2-4 polyprotein; AltName: Full=Retrotransposable eleme…
TRINITY_DN29609_c2_g2	-4.88034	6.05e-14	8.29e-13	yes	down	2.44	0.08	None	None
TRINITY_DN31910_c0_g1	-4.88034	6.05e-14	8.29e-13	yes	down	12.76	0.39	None	None
TRINITY_DN32154_c5_g3	-1.65492	6.71e-14	9.18e-13	yes	down	2.15	0.77	XP_023183949.1(SH3 domain-binding glutamic acid-rich-like protein isoform X1 [Xiphophorus maculatus])	gi|130407|sp|P10394.1|POL4_DROME(RecName: Full=Retrovirus-related Pol polyprotein from transposon 412; Includes: RecName: Full=Protease; Includes: RecName: Full=Reverse transcriptase; Includes: RecName: Full=Endonuclease)
TRINITY_DN21526_c0_g1	-4.87311	7.08e-14	9.66e-13	yes	down	2.13	0.04	XP_023661202.1(uncharacterized protein LOC111840517 isoform X1 [Paramormyrops kingsleyae])	None
TRINITY_DN20253_c1_g1	6.5626	7.22e-14	9.85e-13	yes	up	0	12.28	None	None
TRINITY_DN12704_c0_g2	-6.88034	7.23e-14	9.86e-13	yes	down	1.67	0	BAC82609.1(pol-like protein [Danio rerio])	gi|141475|sp|P14381.1|YTX2_XENLA(RecName: Full=Transposon TX1 uncharacterized 149 kDa protein; AltName: Full=ORF 2)
TRINITY_DN31123_c1_g1	1.33437	7.34e-14	1e-12	yes	up	2.58	6.51	XP_017332981.1(PREDICTED: 2,4-dienoyl-CoA reductase, mitochondrial [Ictalurus punctatus])	gi|3913456|sp|Q16698.1|DECR_HUMAN(RecName: Full=2,4-dienoyl-CoA reductase, mitochondrial; AltName: Full=2,4-dienoyl-CoA reductase [NADPH]; Short=4-enoyl-CoA reductase [NADPH]; AltName: Full=Short chain dehydrogenase/reductase family 18C member 1; Flags: Precursor)
TRINITY_DN39698_c0_g3	3.02655	7.4e-14	1.01e-12	yes	up	1.34	10.59	XP_018954313.1(PREDICTED: troponin I, fast skeletal muscle-like isoform X1 [Cyprinus carpio])	gi|401209|sp|P02643.3|TNNI2_RABIT(RecName: Full=Troponin I, fast skeletal muscle; AltName: Full=Troponin I, fast-twitch isoform)
TRINITY_DN44263_c1_g3	1.01708	7.41e-14	1.01e-12	yes	up	188.81	383.57	None	None
TRINITY_DN41343_c1_g2	-1.9789	7.51e-14	1.02e-12	yes	down	18.64	6	None	None
TRINITY_DN35133_c0_g1	-1.3264	7.72e-14	1.05e-12	yes	down	20.36	11.06	None	None
TRINITY_DN43165_c0_g2	-2.51169	7.9e-14	1.07e-12	yes	down	0.77	0.14	XP_016340711.1(PREDICTED: sucrase-isomaltase, intestinal-like [Sinocyclocheilus anshuiensis])	gi|317373594|sp|P14410.6|SUIS_HUMAN(RecName: Full=Sucrase-isomaltase, intestinal; Contains: RecName: Full=Sucrase; Contains: RecName: Full=Isomaltase)
TRINITY_DN39802_c1_g2	-1.07725	7.99e-14	1.08e-12	yes	down	73.3	29.03	None	None
TRINITY_DN27827_c0_g1	-1.89328	8.34e-14	1.13e-12	yes	down	1.33	0.38	XP_021330383.1(unconventional myosin-XV [Danio rerio])	gi|296439233|sp|Q9UKN7.2|MYO15_HUMAN(RecName: Full=Unconventional myosin-XV; AltName: Full=Unconventional myosin-15)
TRINITY_DN24618_c0_g1	-1.43115	8.34e-14	1.13e-12	yes	down	3.9	1.52	NP_001025333.1(potassium channel subfamily K member 3 [Danio rerio])	gi|13124029|sp|O54912.1|KCNK3_RAT(RecName: Full=Potassium channel subfamily K member 3; AltName: Full=Acid-sensitive potassium channel protein TASK-1; AltName: Full=TWIK-related acid-sensitive K(+) channel 1; AltName: Full=Two pore potassium channel KT3.1; Short=Two pore K(+) channel KT3.1)
TRINITY_DN22724_c3_g1	-1.89315	8.39e-14	1.13e-12	yes	down	17.49	6.14	None	None
TRINITY_DN19100_c3_g1	-1.09424	8.52e-14	1.15e-12	yes	down	21.13	6.47	XP_016324708.1(PREDICTED: gamma-aminobutyric acid receptor subunit pi-like [Sinocyclocheilus anshuiensis])	gi|6016089|sp|O00591.1|GBRP_HUMAN(RecName: Full=Gamma-aminobutyric acid receptor subunit pi; AltName: Full=GABA(A) receptor subunit pi; Flags: Precursor)
TRINITY_DN32363_c0_g1	-3.99582	8.85e-14	1.19e-12	yes	down	1.62	0.1	None	None
TRINITY_DN39621_c3_g1	-1.60204	9.05e-14	1.22e-12	yes	down	11.24	5.09	None	None
TRINITY_DN32869_c1_g1	-1.99582	9.39e-14	1.26e-12	yes	down	2.91	0.78	XP_019211475.1(PREDICTED: putative nuclease HARBI1 [Oreochromis niloticus])	gi|82181968|sp|Q6AZB8.1|HARB1_DANRE(RecName: Full=Putative nuclease HARBI1; AltName: Full=Harbinger transposase-derived nuclease)
TRINITY_DN49215_c3_g1	-2.6173	9.42e-14	1.27e-12	yes	down	1.59	5.46	XP_023011363.2(LOW QUALITY PROTEIN: uncharacterized protein LOC106676862 [Maylandia zebra])	gi|172045711|sp|Q7TN75.2|PEG10_MOUSE(RecName: Full=Retrotransposon-derived protein PEG10; AltName: Full=Embryonal carcinoma differentiation regulated protein; AltName: Full=Mammalian retrotransposon-derived protein 2; AltName: Full=Myelin expression factor 3; Short=MyEF-3; AltName: Full=Myelin expression factor 3-like protein 1; Short=MEF3-like protein 1; AltName: Full=Paternally expressed gene 1…
TRINITY_DN31727_c2_g1	1.78479	1e-13	1.35e-12	yes	up	0.52	1.85	KKF29186.1(Solute carrier family 25 member 35 [Larimichthys crocea])	gi|150416119|sp|A3KPP4.1|S2535_DANRE(RecName: Full=Solute carrier family 25 member 35)
TRINITY_DN24574_c0_g2	-1.76898	1.02e-13	1.37e-12	yes	down	26.91	11.17	None	None
TRINITY_DN38420_c0_g1	-1.53726	1.04e-13	1.39e-12	yes	down	3.5	1.19	None	None
TRINITY_DN29342_c1_g1	-2.74468	1.05e-13	1.41e-12	yes	down	14.66	2.11	None	None
TRINITY_DN36932_c0_g2	-2.90203	1.08e-13	1.45e-12	yes	down	16.91	2.52	None	None
TRINITY_DN26065_c3_g1	-1.11301	1.09e-13	1.45e-12	yes	down	14.42	7.24	None	None
TRINITY_DN24517_c0_g1	-2.24755	1.09e-13	1.46e-12	yes	down	10.05	0.9	XP_021178845.1(synaptosomal-associated protein 23 isoform X2 [Fundulus heteroclitus])	gi|548942|sp|P36976.1|SNP25_TORMA(RecName: Full=Synaptosomal-associated protein 25; Short=SNAP-25; AltName: Full=Synaptosomal-associated 25 kDa protein)
TRINITY_DN46764_c0_g1	-3.72834	1.11e-13	1.49e-12	yes	down	5.64	0.16	None	None
TRINITY_DN43199_c1_g1	-3.72834	1.11e-13	1.49e-12	yes	down	2.75	0.38	None	None
TRINITY_DN26687_c0_g8	-4.84996	1.16e-13	1.55e-12	yes	down	39.43	1.44	KKF31404.1(putative AC9 transposase [Larimichthys crocea])	None
TRINITY_DN48301_c1_g2	-1.15368	1.22e-13	1.62e-12	yes	down	101.69	47.45	None	None
TRINITY_DN24337_c2_g3	-6.84996	1.25e-13	1.66e-12	yes	down	22.33	0	XP_016098999.1(PREDICTED: N-lysine methyltransferase SETD8-like [Sinocyclocheilus grahami])	gi|123884184|sp|Q08AY6.1|KT5AA_XENLA(RecName: Full=N-lysine methyltransferase KMT5A-A; AltName: Full=Histone-lysine N-methyltransferase KMT5A-A; AltName: Full=Lysine-specific methylase 5A-A; AltName: Full=SET domain-containing protein 8-A)
TRINITY_DN45074_c1_g2	-6.84996	1.25e-13	1.66e-12	yes	down	14.18	0	None	None
TRINITY_DN45815_c0_g1	-6.84996	1.25e-13	1.66e-12	yes	down	1.75	0	XP_022520201.1(acrosomal protein SP-10 [Astyanax mexicanus])	None
TRINITY_DN46406_c3_g2	-2.9878	1.33e-13	1.76e-12	yes	down	20.61	2.5	None	None
TRINITY_DN42783_c1_g1	1.96096	1.33e-13	1.77e-12	yes	up	2.92	1.75	XP_016390501.1(PREDICTED: cilia- and flagella-associated protein 54 [Sinocyclocheilus rhinocerous])	gi|754286181|sp|Q96N23.3|CFA54_HUMAN(RecName: Full=Cilia- and flagella-associated protein 54)
TRINITY_DN22962_c0_g1	2.89247	1.36e-13	1.8e-12	yes	up	10.23	57.67	None	None
TRINITY_DN29388_c2_g1	1.0796	1.4e-13	1.86e-12	yes	up	9.9	21.66	XP_016359369.1(PREDICTED: cytochrome c oxidase subunit 8B, mitochondrial-like [Sinocyclocheilus anshuiensis])	gi|41016873|sp|Q863F9.1|COX8B_TARSY(RecName: Full=Cytochrome c oxidase subunit 8B, mitochondrial; AltName: Full=Cytochrome c oxidase polypeptide VIII-heart; AltName: Full=Cytochrome c oxidase subunit 8-1; AltName: Full=Cytochrome c oxidase subunit 8H; Flags: Precursor)
TRINITY_DN35758_c0_g3	-1.80819	1.41e-13	1.87e-12	yes	down	4.81	1.84	XP_023205145.1(interferon-induced very large GTPase 1-like isoform X2 [Xiphophorus maculatus])	None
TRINITY_DN25162_c4_g1	1.58466	1.42e-13	1.88e-12	yes	up	5.95	14.7	None	None
TRINITY_DN36911_c0_g2	-1.22138	1.46e-13	1.93e-12	yes	down	22.17	9.97	XP_018922738.1(PREDICTED: protein phosphatase 1 regulatory subunit 17 isoform X3 [Cyprinus carpio])	None
TRINITY_DN35182_c0_g1	-3.346	1.57e-13	2.08e-12	yes	down	8.16	6.74	None	None
TRINITY_DN44158_c2_g3	-3.346	1.57e-13	2.08e-12	yes	down	43.62	7.15	None	None
TRINITY_DN22709_c1_g1	-2.6372	1.59e-13	2.1e-12	yes	down	6.56	1.5	XP_018947233.1(PREDICTED: uncharacterized protein LOC109075821 [Cyprinus carpio])	None
TRINITY_DN21930_c0_g1	-1.9816	1.61e-13	2.12e-12	yes	down	19.97	8.64	None	None
TRINITY_DN31367_c1_g2	-1.6991	1.61e-13	2.12e-12	yes	down	4.27	1.36	XP_016321298.1(PREDICTED: major facilitator superfamily domain-containing protein 10-like isoform X1 [Sinocyclocheilus anshuiensis])	gi|122142191|sp|Q0P5M9.1|MFS10_BOVIN(RecName: Full=Major facilitator superfamily domain-containing protein 10; AltName: Full=Tetracycline transporter-like protein)
TRINITY_DN39023_c0_g1	-1.01834	1.62e-13	2.14e-12	yes	down	8.04	4.13	None	None
TRINITY_DN29080_c0_g2	1.75387	1.63e-13	2.15e-12	yes	up	2.01	7.12	ALM01481.1(cytochrome P450 [Paramisgurnus dabryanus])	gi|19924296|sp|Q92110.2|CP1A1_ONCMY(RecName: Full=Cytochrome P450 1A1; AltName: Full=CYP1A2; AltName: Full=CYPIA1)
TRINITY_DN38115_c2_g1	1.75387	1.63e-13	2.15e-12	yes	up	0.47	2.01	XP_020780058.1(uncharacterized protein LOC110159790 [Boleophthalmus pectinirostris])	gi|81945490|sp|Q89703.1|POL_CSVMV(RecName: Full=Putative enzymatic polyprotein; Includes: RecName: Full=Protease; Short=PR; Includes: RecName: Full=Reverse transcriptase; Short=RT; Includes: RecName: Full=Ribonuclease H [Cassava vein mosaic virus])
TRINITY_DN22915_c1_g1	-1.46892	1.64e-13	2.15e-12	yes	down	38.44	13.9	None	None
TRINITY_DN46570_c0_g4	-1.0578	1.67e-13	2.2e-12	yes	down	43.91	36.07	None	None
TRINITY_DN48376_c1_g2	1.63591	1.75e-13	2.29e-12	yes	up	1.73	6.89	XP_017537853.1(PREDICTED: tectonic-3 isoform X2 [Pygocentrus nattereri])	gi|81901555|sp|Q8R2Q6.1|TECT3_MOUSE(RecName: Full=Tectonic-3; Flags: Precursor)
TRINITY_DN32263_c0_g1	-3.20227	1.76e-13	2.31e-12	yes	down	3.13	0.33	AAH75994.1(Aspartoacylase (aminocyclase) 3.1 [Danio rerio])	gi|223634795|sp|Q6DHI0.2|ACY3A_DANRE(RecName: Full=N-acyl-aromatic-L-amino acid amidohydrolase (carboxylate-forming) A; AltName: Full=Aminoacylase-3.1; Short=ACY-3.1; AltName: Full=Aspartoacylase-2A)
TRINITY_DN31761_c0_g1	-1.8548	1.81e-13	2.37e-12	yes	down	3.66	1.08	XP_016142748.1(PREDICTED: sperm acrosome membrane-associated protein 6-like [Sinocyclocheilus grahami])	gi|939319684|sp|W5XKT8.2|SACA6_HUMAN(RecName: Full=Sperm acrosome membrane-associated protein 6; AltName: Full=BACHELOR-like protein; Flags: Precursor)
TRINITY_DN36355_c0_g4	2.233	1.86e-13	2.44e-12	yes	up	2.32	11.43	XP_016422019.1(PREDICTED: uncharacterized protein LOC107750954 [Sinocyclocheilus rhinocerous])	None
TRINITY_DN20797_c1_g3	-3.07965	1.9e-13	2.49e-12	yes	down	7.28	2.03	None	None
TRINITY_DN25715_c0_g1	-2.59443	1.92e-13	2.5e-12	yes	down	10.25	2.39	XP_013886630.1(PREDICTED: trichohyalin-like [Austrofundulus limnaeus])	gi|83305012|sp|P16884.4|NFH_RAT(RecName: Full=Neurofilament heavy polypeptide; Short=NF-H; AltName: Full=200 kDa neurofilament protein; AltName: Full=Neurofilament triplet H protein)
TRINITY_DN22162_c2_g2	-2.88034	2.02e-13	2.64e-12	yes	down	19.17	2.59	None	None
TRINITY_DN35282_c2_g1	-1.11616	2.03e-13	2.64e-12	yes	down	6.94	3.3	XP_018981600.1(PREDICTED: C-type lectin domain family 11 member A [Cyprinus carpio])	gi|34223087|sp|Q9Y240.1|CLC11_HUMAN(RecName: Full=C-type lectin domain family 11 member A; AltName: Full=C-type lectin superfamily member 3; AltName: Full=Lymphocyte secreted C-type lectin; AltName: Full=Stem cell growth factor; AltName: Full=p47; Flags: Precursor)
TRINITY_DN28734_c0_g1	2.77501	2.11e-13	2.75e-12	yes	up	0.26	1.68	XP_018974718.1(PREDICTED: toll-like receptor 12 [Cyprinus carpio])	gi|81175030|sp|Q6QNU9.1|TLR12_MOUSE(RecName: Full=Toll-like receptor 12; Flags: Precursor)
TRINITY_DN26853_c1_g2	-1.99753	2.13e-13	2.77e-12	yes	down	9.4	4.98	None	None
TRINITY_DN31589_c2_g1	-6.81894	2.16e-13	2.82e-12	yes	down	4.25	0	None	None
TRINITY_DN35251_c0_g1	-2.07298	2.22e-13	2.88e-12	yes	down	14.82	9.45	None	None
TRINITY_DN36845_c0_g1	-1.50183	2.24e-13	2.91e-12	yes	down	16.03	7.14	None	None
TRINITY_DN25337_c0_g1	1.37386	2.4e-13	3.11e-12	yes	up	30.52	89.15	None	None
TRINITY_DN19234_c1_g3	-1.50009	2.43e-13	3.15e-12	yes	down	34.46	14.96	None	None
TRINITY_DN37823_c1_g2	2.30366	2.43e-13	3.15e-12	yes	up	0.91	2.84	XP_016321003.1(PREDICTED: uncharacterized serine/threonine-protein kinase SgK494-like [Sinocyclocheilus anshuiensis])	gi|74724242|sp|Q96LW2.1|SG494_HUMAN(RecName: Full=Uncharacterized serine/threonine-protein kinase SgK494; AltName: Full=Sugen kinase 494)
TRINITY_DN45524_c0_g2	2.0637	2.48e-13	3.22e-12	yes	up	0.42	1.8	XP_022521892.1(uncharacterized protein LOC111191365 [Astyanax mexicanus])	None
TRINITY_DN43662_c1_g1	-2.37801	2.72e-13	3.52e-12	yes	down	6.9	1.33	XP_023808666.1(uncharacterized protein LOC101166204 isoform X3 [Oryzias latipes])	None
TRINITY_DN40722_c0_g1	1.11966	2.73e-13	3.53e-12	yes	up	31.27	70.93	None	None
TRINITY_DN32880_c0_g2	-2.18615	2.81e-13	3.63e-12	yes	down	1.07	0.24	XP_018919221.1(PREDICTED: uncharacterized protein LOC109045864 [Cyprinus carpio])	None
TRINITY_DN42216_c2_g1	2.34848	2.9e-13	3.74e-12	yes	up	0.23	2.39	XP_016337221.1(PREDICTED: tyrosine-protein kinase Fes/Fps-like [Sinocyclocheilus anshuiensis])	gi|125368|sp|P00530.1|FPS_FUJSV(RecName: Full=Tyrosine-protein kinase transforming protein Fps)
TRINITY_DN23022_c2_g1	1.02438	2.94e-13	3.79e-12	yes	up	6.94	14.8	NP_998300.2(cytochrome b5 [Danio rerio])	gi|117809|sp|P00167.2|CYB5_HUMAN(RecName: Full=Cytochrome b5; AltName: Full=Microsomal cytochrome b5 type A; Short=MCB5)
TRINITY_DN20875_c0_g1	-3.18193	3.03e-13	3.9e-12	yes	down	11.49	0.35	XP_017563637.1(PREDICTED: structural maintenance of chromosomes protein 1A isoform X2 [Pygocentrus nattereri])	gi|29336595|sp|O97593.1|SMC1A_BOVIN(RecName: Full=Structural maintenance of chromosomes protein 1A; Short=SMC protein 1A; Short=SMC-1A)
TRINITY_DN43990_c0_g1	-1.4515	3.06e-13	3.95e-12	yes	down	1.14	0.37	XP_021327458.1(uncharacterized protein LOC110438689 [Danio rerio])	None
TRINITY_DN21100_c0_g1	1.96523	3.2e-13	4.11e-12	yes	up	3.72	18.63	ACQ58312.1(Hemoglobin subunit alpha-2 [Anoplopoma fimbria])	None
TRINITY_DN43615_c1_g1	1.6681	3.2e-13	4.11e-12	yes	up	66.95	209.15	None	None
TRINITY_DN28595_c1_g2	-5.75481	3.25e-13	4.17e-12	yes	down	11.27	0.22	None	None
TRINITY_DN33058_c1_g1	-1.05697	3.26e-13	4.18e-12	yes	down	35.11	18.52	None	None
TRINITY_DN40515_c0_g1	-2.16829	3.31e-13	4.24e-12	yes	down	7.33	1.71	XP_018934039.1(PREDICTED: LOW QUALITY PROTEIN: complement factor I-like [Cyprinus carpio])	gi|75041085|sp|Q5R5A4.1|CFAI_PONAB(RecName: Full=Complement factor I; AltName: Full=C3B/C4B inactivator; Contains: RecName: Full=Complement factor I heavy chain; Contains: RecName: Full=Complement factor I light chain; Flags: Precursor)
TRINITY_DN43649_c0_g2	1.05673	3.34e-13	4.28e-12	yes	up	5.76	8.79	XP_016413653.1(PREDICTED: palmitoyltransferase ZDHHC23-like [Sinocyclocheilus rhinocerous])	gi|550544272|sp|Q76IC6.2|ZDH23_RAT(RecName: Full=Palmitoyltransferase ZDHHC23; AltName: Full=NNOS-interacting DHHC domain-containing protein with dendritic mRNA; AltName: Full=Zinc finger DHHC domain-containing protein 23; Short=DHHC-23; Short=zDHHC23)
TRINITY_DN37833_c2_g2	-3.93923	3.34e-13	4.28e-12	yes	down	3.94	0.27	XP_016125750.1(PREDICTED: chromosome transmission fidelity protein 8 homolog isoform X1 [Sinocyclocheilus grahami])	gi|182639277|sp|P0C6T1.1|CTF8_RAT(RecName: Full=Chromosome transmission fidelity protein 8 homolog)
TRINITY_DN40200_c2_g1	1.15179	3.4e-13	4.34e-12	yes	up	29.08	52.78	XP_018972959.1(PREDICTED: bryoporin-like [Cyprinus carpio])	gi|410591580|sp|P0DKQ8.1|ACTP_CONCN(RecName: Full=Conoporin-Cn1; Flags: Precursor)
TRINITY_DN41395_c0_g2	1.99151	3.52e-13	4.5e-12	yes	up	14.46	66.5	None	None
TRINITY_DN48856_c3_g4	-1.346	3.52e-13	4.5e-12	yes	down	47.84	18.29	None	None
TRINITY_DN47421_c2_g1	-1.04223	3.6e-13	4.59e-12	yes	down	9.36	9.9	None	None
TRINITY_DN21760_c0_g2	-6.78723	3.75e-13	4.78e-12	yes	down	16.42	0	None	None
TRINITY_DN35125_c1_g2	-6.78723	3.75e-13	4.78e-12	yes	down	8.13	0	None	None
TRINITY_DN43143_c1_g1	-2.284	3.88e-13	4.94e-12	yes	down	9.63	2	None	None
TRINITY_DN40507_c0_g1	1.60242	3.93e-13	4.99e-12	yes	up	7.34	29.79	None	None
TRINITY_DN20589_c0_g3	-2.24534	3.99e-13	5.07e-12	yes	down	6.86	0.63	BAE46429.1(ORF2-encoded protein, partial [Danio rerio])	gi|134082|sp|P21329.1|RTJK_DROFU(RecName: Full=RNA-directed DNA polymerase from mobile element jockey; AltName: Full=Reverse transcriptase)
TRINITY_DN21545_c0_g4	-6.78338	4.01e-13	5.09e-12	yes	down	7.03	0	XP_023999252.1(bryoporin-like isoform X1 [Salvelinus alpinus])	gi|68566091|sp|Q5R231.1|ACTP1_ACTVL(RecName: Full=DELTA-thalatoxin-Avl1a; Short=DELTA-TATX-Avl1a; AltName: Full=Cytolysin Avt-I; AltName: Full=Hemolytic toxin Avt-1; Flags: Precursor)
TRINITY_DN21341_c0_g5	1.78951	4.17e-13	5.28e-12	yes	up	3.38	13.88	XP_016400322.1(PREDICTED: mamu class II histocompatibility antigen, DR alpha chain-like [Sinocyclocheilus rhinocerous])	gi|122185|sp|P01904.2|HA21_MOUSE(RecName: Full=H-2 class II histocompatibility antigen, E-D alpha chain; Short=H2-IE-alpha; Flags: Precursor)
TRINITY_DN40598_c3_g1	-3.67389	4.18e-13	5.3e-12	yes	down	21.05	3.96	None	None
TRINITY_DN19493_c1_g1	1.94007	4.2e-13	5.33e-12	yes	up	23.1	26.21	None	None
TRINITY_DN44311_c0_g2	4.02655	4.24e-13	5.37e-12	yes	up	0.06	1.1	XP_017212789.1(AMP deaminase 1 isoform X4 [Danio rerio])	gi|384872309|sp|P23109.2|AMPD1_HUMAN(RecName: Full=AMP deaminase 1; AltName: Full=AMP deaminase isoform M; AltName: Full=Myoadenylate deaminase)
TRINITY_DN22861_c0_g1	-1.06405	4.41e-13	5.58e-12	yes	down	65.02	27.82	None	None
TRINITY_DN44671_c1_g1	-1.95359	4.54e-13	5.74e-12	yes	down	20.39	5.51	None	None
TRINITY_DN22152_c3_g1	-1.26321	4.76e-13	6.01e-12	yes	down	34.06	12.21	XP_016524470.1(PREDICTED: complement component receptor 1-like protein [Poecilia formosa])	gi|158517847|sp|P08603.4|CFAH_HUMAN(RecName: Full=Complement factor H; AltName: Full=H factor 1; Flags: Precursor)
TRINITY_DN26046_c1_g1	-1.02689	5.08e-13	6.4e-12	yes	down	20.57	10.58	None	None
TRINITY_DN22875_c2_g1	2.65458	5.45e-13	6.86e-12	yes	up	0.26	1.59	XP_018968585.1(PREDICTED: uncharacterized protein LOC109099527 [Cyprinus carpio])	gi|395398617|sp|Q99572.4|P2RX7_HUMAN(RecName: Full=P2X purinoceptor 7; Short=P2X7; AltName: Full=ATP receptor; AltName: Full=P2Z receptor; AltName: Full=Purinergic receptor)
TRINITY_DN21189_c1_g2	4.51198	5.47e-13	6.88e-12	yes	up	0.07	1.61	XP_010775187.1(PREDICTED: arginine-glutamic acid dipeptide repeats protein-like [Notothenia coriiceps])	None
TRINITY_DN47842_c2_g3	-1.6833	5.48e-13	6.89e-12	yes	down	52.26	16.9	None	None
TRINITY_DN23430_c1_g3	2.3827	5.48e-13	6.89e-12	yes	up	17.08	69.7	XP_023808666.1(uncharacterized protein LOC101166204 isoform X3 [Oryzias latipes])	None
TRINITY_DN20146_c5_g1	-2.35366	5.6e-13	7.04e-12	yes	down	6.26	1.23	None	None
TRINITY_DN25635_c1_g1	-1.61814	5.63e-13	7.07e-12	yes	down	27.72	5.71	None	None
TRINITY_DN35493_c2_g1	-2.271	5.64e-13	7.08e-12	yes	down	31.88	9.84	None	None
TRINITY_DN39294_c1_g1	-1.12687	5.69e-13	7.14e-12	yes	down	26.53	16.92	XP_018977784.1(PREDICTED: H-2 class II histocompatibility antigen, A-Q alpha chain-like [Cyprinus carpio])	gi|122209|sp|P14438.1|HA2U_MOUSE(RecName: Full=H-2 class II histocompatibility antigen, A-U alpha chain)
TRINITY_DN37102_c1_g8	1.31643	5.71e-13	7.15e-12	yes	up	3.31	8.64	BAG72202.1(collagen type I alpha 3 [Carassius auratus])	gi|296439504|sp|P02452.5|CO1A1_HUMAN(RecName: Full=Collagen alpha-1(I) chain; AltName: Full=Alpha-1 type I collagen; Flags: Precursor)
TRINITY_DN31590_c0_g1	-2.55841	5.71e-13	7.15e-12	yes	down	1.41	0.25	XP_017214605.1(uncharacterized protein LOC108192163 [Danio rerio])	gi|126296|sp|P08548.1|LIN1_NYCCO(RecName: Full=LINE-1 reverse transcriptase homolog)
TRINITY_DN19073_c1_g1	-1.38029	5.86e-13	7.35e-12	yes	down	152.98	116.29	XP_014023932.1(PREDICTED: protein tyrosine phosphatase domain-containing protein 1-like [Salmo salar])	None
TRINITY_DN19871_c1_g5	2.83848	5.9e-13	7.39e-12	yes	up	2.21	8.55	None	None
TRINITY_DN47590_c2_g1	-5.72164	6.02e-13	7.54e-12	yes	down	6.14	0.12	NP_001315024.1(glucose-6-phosphate exchanger SLC37A4 [Danio rerio])	gi|3913718|sp|O43826.1|G6PT1_HUMAN(RecName: Full=Glucose-6-phosphate exchanger SLC37A4; AltName: Full=Glucose-5-phosphate transporter; AltName: Full=Glucose-6-phosphate translocase; AltName: Full=Solute carrier family 37 member 4; AltName: Full=Transformation-related gene 19 protein; Short=TRG-19)
TRINITY_DN35597_c0_g1	-1.90528	6.11e-13	7.64e-12	yes	down	22.25	8.36	XP_016407934.1(PREDICTED: proteinase-activated receptor 4-like [Sinocyclocheilus rhinocerous])	gi|341941229|sp|O88634.2|PAR4_MOUSE(RecName: Full=Proteinase-activated receptor 4; Short=PAR-4; AltName: Full=Coagulation factor II receptor-like 3; AltName: Full=Thrombin receptor-like 3; Flags: Precursor)
TRINITY_DN48148_c0_g1	1.45953	6.12e-13	7.65e-12	yes	up	25.29	75.03	None	None
TRINITY_DN41737_c0_g1	-2.04261	6.5e-13	8.12e-12	yes	down	22.28	5.1	None	None
TRINITY_DN22680_c2_g4	-3.91009	6.5e-13	8.12e-12	yes	down	6.34	0.44	None	None
TRINITY_DN28218_c1_g1	-3.91009	6.5e-13	8.12e-12	yes	down	10.74	0.29	XP_016408442.1(PREDICTED: gastrula zinc finger protein XlCGF7.1-like [Sinocyclocheilus rhinocerous])	None
TRINITY_DN27602_c0_g3	-6.75481	6.53e-13	8.14e-12	yes	down	2.88	0	XP_024138292.1(uncharacterized protein LOC112152750 [Oryzias melastigma])	None
TRINITY_DN29801_c1_g1	-6.75481	6.53e-13	8.14e-12	yes	down	5.64	0	XP_020340844.1(GRB2-associated-binding protein 3-like isoform X1 [Oncorhynchus kisutch])	None
TRINITY_DN34742_c0_g3	-6.75481	6.53e-13	8.14e-12	yes	down	2.26	0	KTF78193.1(hypothetical protein cypCar_00045488, partial [Cyprinus carpio])	None
TRINITY_DN39018_c0_g1	-1.1935	6.62e-13	8.23e-12	yes	down	3.48	1.59	XP_016431007.1(PREDICTED: Usher syndrome type-1C protein-binding protein 1 [Sinocyclocheilus rhinocerous])	gi|342187107|sp|Q8R370.2|USBP1_MOUSE(RecName: Full=Usher syndrome type-1C protein-binding protein 1; Short=USH1C-binding protein 1)
TRINITY_DN35392_c1_g4	-2.75481	6.89e-13	8.56e-12	yes	down	4.67	0.62	XP_022530405.1(uncharacterized protein LOC111193526 [Astyanax mexicanus])	None
TRINITY_DN47188_c1_g3	-1.28722	7.01e-13	8.71e-12	yes	down	23.26	11.23	None	None
TRINITY_DN29639_c0_g3	4.0023	7.29e-13	9.06e-12	yes	up	0.4	6.16	XP_018948722.1(PREDICTED: galactose-specific lectin nattectin-like [Cyprinus carpio])	gi|60390624|sp|Q66S03.1|LECG_THANI(RecName: Full=Galactose-specific lectin nattectin; Short=CTL; Flags: Precursor)
TRINITY_DN21152_c2_g1	6.43254	7.39e-13	9.16e-12	yes	up	0	1.4	XP_016305300.1(PREDICTED: uncharacterized protein LOC107660501 [Sinocyclocheilus anshuiensis])	gi|74732341|sp|Q96MB7.1|HARB1_HUMAN(RecName: Full=Putative nuclease HARBI1; AltName: Full=Harbinger transposase-derived nuclease)
TRINITY_DN22148_c0_g1	6.43254	7.39e-13	9.16e-12	yes	up	0	5.56		gi|52783455|sp|Q8BWF0.1|SSDH_MOUSE(RecName: Full=Succinate-semialdehyde dehydrogenase, mitochondrial; AltName: Full=Aldehyde dehydrogenase family 5 member A1; AltName: Full=NAD(+)-dependent succinic semialdehyde dehydrogenase; Flags: Precursor)
TRINITY_DN31756_c3_g1	6.43254	7.39e-13	9.16e-12	yes	up	0	2.62	XP_016349097.1(PREDICTED: GTPase IMAP family member 7-like [Sinocyclocheilus anshuiensis])	gi|38372383|sp|Q99MI6.2|GIMA3_MOUSE(RecName: Full=GTPase IMAP family member 3; AltName: Full=Immunity-associated nucleotide 4 protein; Short=IAN-4)
TRINITY_DN39169_c1_g2	-1.31186	7.43e-13	9.21e-12	yes	down	14.75	6.23	None	None
TRINITY_DN32931_c1_g5	-3.64587	8.1e-13	1e-11	yes	down	13.34	1.11	None	None
TRINITY_DN31451_c0_g1	-1.64645	8.21e-13	1.01e-11	yes	down	2.06	0.69	KTF81541.1(hypothetical protein cypCar_00017788 [Cyprinus carpio])	gi|189046130|sp|A8WHP3.1|SC5A9_DANRE(RecName: Full=Sodium/glucose cotransporter 4; Short=Na(+)/glucose cotransporter 4; AltName: Full=Solute carrier family 5 member 9)
TRINITY_DN28393_c0_g2	1.88595	8.26e-13	1.02e-11	yes	up	0.81	5.11	XP_013861075.1(PREDICTED: uncharacterized protein LOC106515698, partial [Austrofundulus limnaeus])	None
TRINITY_DN43283_c0_g1	-1.44632	8.39e-13	1.04e-11	yes	down	13.6	3.33	KTG38400.1(hypothetical protein cypCar_00029213 [Cyprinus carpio])	gi|635377429|sp|Q5T0N1.3|CFA70_HUMAN(RecName: Full=Cilia- and flagella-associated protein 70; AltName: Full=Tetratricopeptide repeat protein 18; Short=TPR repeat protein 18)
TRINITY_DN46709_c1_g1	-1.69834	9.37e-13	1.15e-11	yes	down	32.34	9.9	XP_016350829.1(PREDICTED: uncharacterized protein LOC107695438 [Sinocyclocheilus anshuiensis])	None
TRINITY_DN21459_c0_g7	2.8201	9.79e-13	1.2e-11	yes	up	0.08	0.61	XP_023659188.1(uncharacterized protein LOC111839473 [Paramormyrops kingsleyae])	gi|130407|sp|P10394.1|POL4_DROME(RecName: Full=Retrovirus-related Pol polyprotein from transposon 412; Includes: RecName: Full=Protease; Includes: RecName: Full=Reverse transcriptase; Includes: RecName: Full=Endonuclease)
TRINITY_DN31846_c0_g1	1.2244	9.8e-13	1.2e-11	yes	up	11.26	11.87	None	None
TRINITY_DN39893_c0_g1	1.22971	1.02e-12	1.25e-11	yes	up	27.37	33.91	None	None
TRINITY_DN48401_c3_g2	-1.08464	1.03e-12	1.26e-11	yes	down	15.15	9.57	None	None
TRINITY_DN19237_c0_g1	-6.72666	1.05e-12	1.28e-11	yes	down	16.76	0	None	None
TRINITY_DN48189_c2_g1	1.6232	1.06e-12	1.3e-11	yes	up	4.35	11.77	XP_021323083.1(uncharacterized protein LOC110438040 [Danio rerio])	None
TRINITY_DN26536_c0_g2	-3.26938	1.11e-12	1.35e-11	yes	down	1.65	0.41	XP_017214605.1(uncharacterized protein LOC108192163 [Danio rerio])	gi|74705367|sp|O00370.1|LORF2_HUMAN(RecName: Full=LINE-1 retrotransposable element ORF2 protein; Short=ORF2p; Includes: RecName: Full=Reverse transcriptase; Includes: RecName: Full=Endonuclease)
TRINITY_DN33553_c0_g2	-5.68769	1.12e-12	1.36e-11	yes	down	7.5	0.13	None	None
TRINITY_DN20393_c0_g5	-5.68769	1.12e-12	1.36e-11	yes	down	2.23	0.02	XP_016329239.1(PREDICTED: piggyBac transposable element-derived protein 3-like, partial [Sinocyclocheilus anshuiensis])	None
TRINITY_DN22530_c2_g1	-5.68769	1.12e-12	1.36e-11	yes	down	0.72	0.01	XP_016341263.1(PREDICTED: RNA-directed DNA polymerase from mobile element jockey-like [Sinocyclocheilus anshuiensis])	gi|134083|sp|P21328.1|RTJK_DROME(RecName: Full=RNA-directed DNA polymerase from mobile element jockey; AltName: Full=Reverse transcriptase)
TRINITY_DN29423_c0_g1	-6.72164	1.14e-12	1.38e-11	yes	down	3.3	0	XP_018949325.1(PREDICTED: uncharacterized protein LOC109078515 [Cyprinus carpio])	None
TRINITY_DN19086_c1_g1	-2.74441	1.15e-12	1.39e-11	yes	down	6.89	4.59	None	None
TRINITY_DN46589_c1_g1	-1.36844	1.19e-12	1.44e-11	yes	down	25.04	12.85	None	None
TRINITY_DN47907_c2_g1	-1.00193	1.2e-12	1.46e-11	yes	down	3.49	2.06	XP_009298036.2(protein sidekick-2-like isoform X4 [Danio rerio])	gi|81893041|sp|Q6V4S5.1|SDK2_MOUSE(RecName: Full=Protein sidekick-2; Flags: Precursor)
TRINITY_DN48059_c2_g2	-2.66103	1.21e-12	1.47e-11	yes	down	2.8	0.62	XP_016381155.1(PREDICTED: cytochrome P450 2K1-like isoform X1 [Sinocyclocheilus rhinocerous])	gi|3913356|sp|Q92090.1|CP2K1_ONCMY(RecName: Full=Cytochrome P450 2K1; AltName: Full=CYPIIK1; AltName: Full=Cytochrome P450 LMC2)
TRINITY_DN30742_c0_g1	-2.66103	1.21e-12	1.47e-11	yes	down	10.58	2.52	None	None
TRINITY_DN31365_c0_g1	-3.12827	1.21e-12	1.47e-11	yes	down	3.95	0.47	NP_001243178.1(HAUS augmin-like complex subunit 1 [Danio rerio])	gi|50400506|sp|Q8BHX1.2|HAUS1_MOUSE(RecName: Full=HAUS augmin-like complex subunit 1; AltName: Full=Coiled-coil domain-containing protein 5)
TRINITY_DN44577_c1_g1	1.06096	1.22e-12	1.47e-11	yes	up	14.96	32.12	None	None
TRINITY_DN45110_c1_g1	-2.21098	1.23e-12	1.48e-11	yes	down	29.94	7.63	None	None
TRINITY_DN32615_c0_g3	1.17411	1.25e-12	1.5e-11	yes	up	9.28	20.21	None	None
TRINITY_DN17492_c0_g1	2.20712	1.25e-12	1.51e-11	yes	up	0.79	3.83	XP_016376353.1(PREDICTED: leukocyte cell-derived chemotaxin 1 [Sinocyclocheilus rhinocerous])	gi|18202273|sp|P58239.1|LECT1_DANRE(RecName: Full=Leukocyte cell-derived chemotaxin 1; Contains: RecName: Full=Chondrosurfactant protein; Short=CH-SP; Contains: RecName: Full=Chondromodulin-1; AltName: Full=Chondromodulin-I; Short=ChM-I; Flags: Precursor)
TRINITY_DN35170_c0_g1	2.20712	1.25e-12	1.51e-11	yes	up	0.51	3.15	XP_016384104.1(PREDICTED: NADPH oxidase 5-like [Sinocyclocheilus rhinocerous])	gi|74717091|sp|Q96PH1.1|NOX5_HUMAN(RecName: Full=NADPH oxidase 5)
TRINITY_DN31521_c2_g2	-3.88034	1.26e-12	1.52e-11	yes	down	1.36	0.1	None	None
TRINITY_DN19828_c0_g1	-2.73278	1.27e-12	1.54e-11	yes	down	2.64	0.38	None	None
TRINITY_DN42639_c4_g1	-1.56267	1.31e-12	1.57e-11	yes	down	49.36	14.55	XP_018923559.1(PREDICTED: zinc finger protein 501-like [Cyprinus carpio])	gi|296453048|sp|Q6ZNG1.2|ZN600_HUMAN(RecName: Full=Zinc finger protein 600)
TRINITY_DN40122_c1_g2	-2.02205	1.32e-12	1.59e-11	yes	down	35.26	7.61	None	None
TRINITY_DN32968_c0_g2	-1.15439	1.34e-12	1.61e-11	yes	down	5	2.36	None	None
TRINITY_DN37801_c1_g3	-1.40441	1.35e-12	1.62e-11	yes	down	37.64	6.75	None	None
TRINITY_DN36188_c1_g1	-1.33014	1.43e-12	1.71e-11	yes	down	3.28	1.31	XP_016323600.1(PREDICTED: zinc finger and SCAN domain-containing protein 5A-like isoform X1 [Sinocyclocheilus anshuiensis])	gi|148887465|sp|P24399.2|ZN239_MOUSE(RecName: Full=Zinc finger protein 239; Short=Zfp-239; AltName: Full=Zinc finger protein MOK-2)
TRINITY_DN19501_c0_g1	-4.72633	1.46e-12	1.74e-11	yes	down	57.63	0.72	None	None
TRINITY_DN27163_c0_g1	2.12949	1.47e-12	1.76e-11	yes	up	2.56	9.49	None	None
TRINITY_DN26926_c0_g1	-3.6173	1.57e-12	1.87e-11	yes	down	1.88	0.13	XP_016375053.1(PREDICTED: uncharacterized protein LOC107713914 isoform X1 [Sinocyclocheilus rhinocerous])	None
TRINITY_DN36934_c1_g3	-3.6173	1.57e-12	1.87e-11	yes	down	11.24	0.96	None	None
TRINITY_DN22800_c0_g2	4.45951	1.61e-12	1.92e-11	yes	up	0.08	1.93	XP_023692912.1(uncharacterized protein LOC111856863 [Paramormyrops kingsleyae])	None
TRINITY_DN37707_c0_g2	4.45951	1.61e-12	1.92e-11	yes	up	0.03	0.75	KKF20321.1(putative RNA-directed DNA polymerase from transposon X-element [Larimichthys crocea])	gi|134082|sp|P21329.1|RTJK_DROFU(RecName: Full=RNA-directed DNA polymerase from mobile element jockey; AltName: Full=Reverse transcriptase)
TRINITY_DN37404_c2_g1	2.91408	1.62e-12	1.93e-11	yes	up	2.18	5.26	None	None
TRINITY_DN41146_c0_g1	2.91408	1.62e-12	1.93e-11	yes	up	0.06	0.46	XP_024660844.1(LOW QUALITY PROTEIN: uncharacterized protein LOC106674705 [Maylandia zebra])	gi|130407|sp|P10394.1|POL4_DROME(RecName: Full=Retrovirus-related Pol polyprotein from transposon 412; Includes: RecName: Full=Protease; Includes: RecName: Full=Reverse transcriptase; Includes: RecName: Full=Endonuclease)
TRINITY_DN48843_c4_g1	-1.89484	1.7e-12	2.02e-11	yes	down	10.79	3.03	None	None
TRINITY_DN42206_c0_g1	-2.27723	1.72e-12	2.05e-11	yes	down	3.48	4.33	XP_016130990.1(PREDICTED: uncharacterized protein C9orf117 homolog isoform X1 [Sinocyclocheilus grahami])	gi|160016574|sp|A2BDR7.1|CI117_DANRE(RecName: Full=Uncharacterized protein C9orf117 homolog)
TRINITY_DN35315_c0_g1	-1.64115	1.73e-12	2.05e-11	yes	down	6.42	1.98	None	None
TRINITY_DN46296_c1_g1	-1.85259	1.73e-12	2.06e-11	yes	down	6.13	7.2	None	None
TRINITY_DN42502_c0_g1	-2.51777	1.88e-12	2.23e-11	yes	down	3.05	0.29	AAH74094.1(Zgc:114089 protein, partial [Danio rerio])	gi|74749770|sp|Q71H61.1|ILDR2_HUMAN(RecName: Full=Immunoglobulin-like domain-containing receptor 2; Flags: Precursor)
TRINITY_DN27253_c0_g1	6.37705	1.89e-12	2.24e-11	yes	up	0	1.09	XP_018952198.1(PREDICTED: uncharacterized protein LOC109081681 [Cyprinus carpio])	None
TRINITY_DN26392_c2_g1	-6.68769	1.99e-12	2.35e-11	yes	down	1.36	0	XP_023812027.1(uncharacterized protein LOC111947633 [Oryzias latipes])	None
TRINITY_DN36621_c1_g1	-6.68769	1.99e-12	2.35e-11	yes	down	3.17	0	XP_016366014.1(PREDICTED: uncharacterized protein LOC107706719 [Sinocyclocheilus rhinocerous])	None
TRINITY_DN43235_c1_g1	-1.56308	2.05e-12	2.42e-11	yes	down	21.45	3.84	XP_018965890.1(PREDICTED: uncharacterized protein LOC109096714 isoform X3 [Cyprinus carpio])	None
TRINITY_DN34871_c0_g1	-2.44827	2.07e-12	2.44e-11	yes	down	16.91	3.53	None	None
TRINITY_DN38475_c0_g3	-3.24291	2.11e-12	2.49e-11	yes	down	0.71	0.12	XP_023698428.1(uncharacterized protein LOC111859709 [Paramormyrops kingsleyae])	gi|130407|sp|P10394.1|POL4_DROME(RecName: Full=Retrovirus-related Pol polyprotein from transposon 412; Includes: RecName: Full=Protease; Includes: RecName: Full=Reverse transcriptase; Includes: RecName: Full=Endonuclease)
TRINITY_DN26546_c0_g1	2.52905	2.16e-12	2.55e-11	yes	up	0.37	2.26	XP_016296100.1(PREDICTED: protein phosphatase 1 regulatory subunit 3G-like [Sinocyclocheilus anshuiensis])	gi|298351823|sp|Q9CW07.2|PP13G_MOUSE(RecName: Full=Protein phosphatase 1 regulatory subunit 3G)
TRINITY_DN28011_c5_g2	2.52905	2.16e-12	2.55e-11	yes	up	9.92	58.55	None	None
TRINITY_DN19868_c1_g2	-2.75917	2.18e-12	2.57e-11	yes	down	41.2	6.25	None	None
TRINITY_DN25666_c1_g3	-1.70032	2.2e-12	2.59e-11	yes	down	33.43	16.81	None	None
TRINITY_DN32656_c2_g1	-1.106	2.2e-12	2.59e-11	yes	down	7.78	3.1	XP_018969495.1(PREDICTED: WD repeat-containing protein 92 [Cyprinus carpio])	gi|82229913|sp|Q561Y0.1|WDR92_DANRE(RecName: Full=WD repeat-containing protein 92)
TRINITY_DN30369_c0_g1	1.72569	2.24e-12	2.63e-11	yes	up	0.49	1.72	XP_018975851.1(PREDICTED: putative pre-mRNA-splicing factor ATP-dependent RNA helicase DHX32 isoform X2 [Cyprinus carpio])	gi|74759011|sp|Q7L7V1.1|DHX32_HUMAN(RecName: Full=Putative pre-mRNA-splicing factor ATP-dependent RNA helicase DHX32; AltName: Full=DEAD/H box 32; AltName: Full=DEAD/H helicase-like protein 1; Short=DHLP1; AltName: Full=DEAH box protein 32; AltName: Full=HuDDX32)
TRINITY_DN22804_c2_g1	2.33689	2.25e-12	2.64e-11	yes	up	0.94	2.23	XP_012675614.1(PREDICTED: uncharacterized protein LOC105893702 [Clupea harengus])	gi|141475|sp|P14381.1|YTX2_XENLA(RecName: Full=Transposon TX1 uncharacterized 149 kDa protein; AltName: Full=ORF 2)
TRINITY_DN20590_c0_g2	-1.75307	2.27e-12	2.66e-11	yes	down	55.32	17.73	None	None
TRINITY_DN20511_c4_g6	-1.7743	2.32e-12	2.71e-11	yes	down	10.01	3.06	None	None
TRINITY_DN22682_c2_g2	-2.79238	2.35e-12	2.75e-11	yes	down	22.22	3.34	None	None
TRINITY_DN28949_c3_g1	-2.25587	2.38e-12	2.79e-11	yes	down	13.54	4.49	None	None
TRINITY_DN47714_c4_g2	2.85017	2.39e-12	2.8e-11	yes	up	0.96	6.75	None	None
TRINITY_DN23581_c2_g1	-1.31265	2.39e-12	2.8e-11	yes	down	16.34	6.87	KTF94862.1(hypothetical protein cypCar_00041541 [Cyprinus carpio])	gi|68059546|sp|Q90WG6.1|NEUA_ONCMY(RecName: Full=N-acylneuraminate cytidylyltransferase; AltName: Full=CMP-N-acetylneuraminic acid synthase; Short=CMP-NeuNAc synthase)
TRINITY_DN21451_c2_g3	-3.84996	2.46e-12	2.87e-11	yes	down	1.09	0.08	XP_023664616.1(uncharacterized protein LOC111842350 [Paramormyrops kingsleyae])	None
TRINITY_DN39512_c3_g1	-3.84996	2.46e-12	2.87e-11	yes	down	7.27	1.74	None	None
TRINITY_DN45460_c0_g2	-2.88034	2.46e-12	2.88e-11	yes	down	6.44	0.71	None	None
TRINITY_DN18669_c0_g1	-2.13565	2.53e-12	2.96e-11	yes	down	8.21	3.87	XP_016104299.1(PREDICTED: uncharacterized protein LOC107563843 [Sinocyclocheilus grahami])	None
TRINITY_DN35920_c1_g3	1.68445	2.57e-12	3e-11	yes	up	3.94	1.67	XP_019210590.1(PREDICTED: uncharacterized protein K02A2.6-like [Oreochromis niloticus])	gi|558446106|sp|P0CT34.1|TF21_SCHPO(RecName: Full=Transposon Tf2-1 polyprotein; AltName: Full=Retrotransposable element Tf2 155 kDa protein >gi|558446108|sp|P0CT35.1|TF22_SCHPO RecName: Full=Transposon Tf2-2 polyprotein; AltName: Full=Retrotransposable element Tf2 155 kDa protein >gi|558446112|sp|P0CT37.1|TF24_SCHPO RecName: Full=Transposon Tf2-4 polyprotein; AltName: Full=Retrotransposable eleme…
TRINITY_DN22885_c3_g1	-1.4163	2.64e-12	3.07e-11	yes	down	72.11	30.2	None	None
TRINITY_DN45689_c1_g2	2.38912	2.66e-12	3.09e-11	yes	up	4.89	13.77	None	None
TRINITY_DN32083_c2_g1	-1.27889	2.73e-12	3.18e-11	yes	down	44.72	17.72	None	None
TRINITY_DN32289_c0_g1	-1.62928	2.76e-12	3.21e-11	yes	down	16	5.33	XP_018949617.1(PREDICTED: LOW QUALITY PROTEIN: N-acylneuraminate cytidylyltransferase-like, partial [Cyprinus carpio])	gi|68059546|sp|Q90WG6.1|NEUA_ONCMY(RecName: Full=N-acylneuraminate cytidylyltransferase; AltName: Full=CMP-N-acetylneuraminic acid synthase; Short=CMP-NeuNAc synthase)
TRINITY_DN36782_c0_g2	1.41297	2.82e-12	3.28e-11	yes	up	1.17	3.26	XP_018521154.1(PREDICTED: cyclin-dependent kinase 14 isoform X1 [Lates calcarifer])	gi|290457633|sp|O35495.2|CDK14_MOUSE(RecName: Full=Cyclin-dependent kinase 14; AltName: Full=Cell division protein kinase 14; AltName: Full=Serine/threonine-protein kinase PFTAIRE-1)
TRINITY_DN36823_c1_g3	-1.06589	2.93e-12	3.4e-11	yes	down	22.06	29.74	None	None
TRINITY_DN40747_c0_g1	-2.25885	3.03e-12	3.52e-11	yes	down	10.67	2.33	None	None
TRINITY_DN36913_c0_g1	-1.34089	3.05e-12	3.54e-11	yes	down	2.74	1.44	XP_018919383.1(PREDICTED: uncharacterized protein LOC109046043 [Cyprinus carpio])	None
TRINITY_DN21076_c1_g3	-4.68769	3.08e-12	3.57e-11	yes	down	2.34	0.1	XP_016329441.1(PREDICTED: uncharacterized protein LOC107678612 [Sinocyclocheilus anshuiensis])	None
TRINITY_DN21795_c1_g1	-4.68769	3.08e-12	3.57e-11	yes	down	5.78	0.16	XP_018940232.1(PREDICTED: uncharacterized protein LOC109067794 [Cyprinus carpio])	None
TRINITY_DN27031_c2_g1	-4.68769	3.08e-12	3.57e-11	yes	down	1.35	0.05	None	None
TRINITY_DN25609_c1_g1	1.06782	3.17e-12	3.66e-11	yes	up	28.38	59.32	None	None
TRINITY_DN12906_c0_g1	3.06207	3.19e-12	3.69e-11	yes	up	0.69	6.04	XP_016131299.1(PREDICTED: AT-rich interactive domain-containing protein 1A-like [Sinocyclocheilus grahami])	gi|288561880|sp|A2BH40.1|ARI1A_MOUSE(RecName: Full=AT-rich interactive domain-containing protein 1A; Short=ARID domain-containing protein 1A; AltName: Full=BRG1-associated factor 250; Short=BAF250; AltName: Full=BRG1-associated factor 250a; Short=BAF250A; AltName: Full=Osa homolog 1; AltName: Full=SWI-like protein; AltName: Full=SWI/SNF complex protein p270; AltName: Full=SWI/SNF-related, matrix-…
TRINITY_DN39830_c0_g1	-1.55172	3.25e-12	3.76e-11	yes	down	20.64	8.18	None	None
TRINITY_DN48329_c2_g1	1.02715	3.32e-12	3.82e-11	yes	up	1.86	9.61	XP_018952937.1(PREDICTED: serine/threonine-protein phosphatase 2A regulatory subunit B' subunit alpha isoform X1 [Cyprinus carpio])	gi|543720|sp|Q06190.1|P2R3A_HUMAN(RecName: Full=Serine/threonine-protein phosphatase 2A regulatory subunit B'' subunit alpha; AltName: Full=PP2A subunit B isoform PR72/PR130; AltName: Full=PP2A subunit B isoform R3 isoform; AltName: Full=PP2A subunit B isoforms B''-PR72/PR130; AltName: Full=PP2A subunit B isoforms B72/B130; AltName: Full=Serine/threonine-protein phosphatase 2A 72/130 kDa regulato…
TRINITY_DN23248_c3_g2	-1.20714	3.32e-12	3.83e-11	yes	down	92.57	36.68	None	None
TRINITY_DN47996_c4_g2	2.09336	3.42e-12	3.93e-11	yes	up	1.42	7.14	KTF90651.1(hypothetical protein cypCar_00009363 [Cyprinus carpio])	gi|1346020|sp|P49109.2|FMO5_CAVPO(RecName: Full=Dimethylaniline monooxygenase [N-oxide-forming] 5; AltName: Full=Dimethylaniline oxidase 5; AltName: Full=Hepatic flavin-containing monooxygenase 5; Short=FMO 5)
TRINITY_DN21969_c0_g2	-6.65293	3.49e-12	4e-11	yes	down	1.3	0	XP_019210225.1(PREDICTED: uncharacterized protein LOC109199360 [Oreochromis niloticus])	None
TRINITY_DN23587_c0_g2	-6.65293	3.49e-12	4e-11	yes	down	5.45	0	None	None
TRINITY_DN24006_c1_g1	-6.65293	3.49e-12	4e-11	yes	down	2.4	0	None	None
TRINITY_DN35028_c0_g2	-6.65293	3.49e-12	4e-11	yes	down	2.43	0	None	None
TRINITY_DN19517_c0_g2	4.42052	3.51e-12	4.02e-11	yes	up	0.37	8.4	XP_016113802.1(PREDICTED: cadherin-1-like [Sinocyclocheilus grahami])	gi|416739|sp|P33145.1|CADHK_CHICK(RecName: Full=B-cadherin; AltName: Full=K-CAM protein; Flags: Precursor)
TRINITY_DN32711_c1_g1	-2.29538	3.57e-12	4.09e-11	yes	down	0.79	0.17	XP_001920640.3(lipoxygenase homology domain-containing protein 1 [Danio rerio])	gi|294956579|sp|C8YR32.1|LOXH1_MOUSE(RecName: Full=Lipoxygenase homology domain-containing protein 1)
TRINITY_DN32712_c0_g2	-1.85177	3.69e-12	4.22e-11	yes	down	9	2.61	None	None
TRINITY_DN31970_c1_g1	-2.86462	3.7e-12	4.23e-11	yes	down	17.26	2.86	None	None
TRINITY_DN32692_c1_g1	2.67253	3.76e-12	4.3e-11	yes	up	4.9	16.1	KTF76883.1(hypothetical protein cypCar_00045433, partial [Cyprinus carpio])	gi|17380146|sp|Q9C000.1|NALP1_HUMAN(RecName: Full=NACHT, LRR and PYD domains-containing protein 1; AltName: Full=Caspase recruitment domain-containing protein 7; AltName: Full=Death effector filament-forming ced-4-like apoptosis protein; AltName: Full=Nucleotide-binding domain and caspase recruitment domain)
TRINITY_DN32916_c0_g3	-4.16985	3.77e-12	4.3e-11	yes	down	1.64	0.05	XP_016357647.1(PREDICTED: uncharacterized protein LOC107700485 [Sinocyclocheilus anshuiensis])	None
TRINITY_DN39026_c0_g4	-4.16985	3.77e-12	4.3e-11	yes	down	1.88	0.08	XP_022517906.1(uncharacterized protein LOC111188455 [Astyanax mexicanus])	None
TRINITY_DN29339_c1_g1	1.37657	3.86e-12	4.4e-11	yes	up	6.28	17.31	None	None
TRINITY_DN23725_c0_g2	3.54281	3.96e-12	4.52e-11	yes	up	0.48	8.84	XP_016106320.1(PREDICTED: tropomyosin alpha-3 chain-like isoform X4 [Sinocyclocheilus grahami])	gi|136087|sp|P13105.1|TPM1_RANTE(RecName: Full=Tropomyosin alpha-1 chain; AltName: Full=Alpha-tropomyosin; AltName: Full=Tropomyosin-1)
TRINITY_DN23139_c2_g1	1.65504	4.02e-12	4.58e-11	yes	up	0.93	2.4	XP_016369985.1(PREDICTED: zinc metalloproteinase-disintegrin-like batroxstatin-1 [Sinocyclocheilus rhinocerous])	gi|14423640|sp|Q9XSL6.1|ADA28_MACFA(RecName: Full=Disintegrin and metalloproteinase domain-containing protein 28; Short=ADAM 28; AltName: Full=Epididymal metalloproteinase-like, disintegrin-like, and cysteine-rich protein II; Short=eMDC II; Flags: Precursor)
TRINITY_DN47142_c2_g2	1.65504	4.02e-12	4.58e-11	yes	up	2.38	7.85	None	None
TRINITY_DN42585_c0_g1	3.16406	4.03e-12	4.59e-11	yes	up	0.18	1.96	None	None
TRINITY_DN32269_c0_g2	1.43614	4.04e-12	4.6e-11	yes	up	2.04	7.63	XP_016305203.1(PREDICTED: transmembrane inner ear expressed protein-like [Sinocyclocheilus anshuiensis])	gi|62287770|sp|Q8K467.1|TMIE_MOUSE(RecName: Full=Transmembrane inner ear expressed protein; Flags: Precursor)
TRINITY_DN27879_c1_g1	-1.18909	4.05e-12	4.61e-11	yes	down	108.51	42.96	XP_017310405.1(PREDICTED: LOW QUALITY PROTEIN: protein NLRC3-like [Ictalurus punctatus])	gi|78099143|sp|Q91VI7.1|RINI_MOUSE(RecName: Full=Ribonuclease inhibitor; AltName: Full=Ribonuclease/angiogenin inhibitor 1)
TRINITY_DN41380_c1_g2	4.41226	4.13e-12	4.69e-11	yes	up	0.33	7.41	None	None
TRINITY_DN25155_c2_g1	-1.15787	4.22e-12	4.79e-11	yes	down	5.32	2.58	XP_016416157.1(PREDICTED: mediator of RNA polymerase II transcription subunit 1 [Sinocyclocheilus rhinocerous])	gi|83288389|sp|Q925J9.2|MED1_MOUSE(RecName: Full=Mediator of RNA polymerase II transcription subunit 1; AltName: Full=Mediator complex subunit 1; AltName: Full=Peroxisome proliferator-activated receptor-binding protein; Short=PBP; Short=PPAR-binding protein; AltName: Full=Thyroid hormone receptor-associated protein complex 220 kDa component; Short=Trap220; AltName: Full=Thyroid receptor-interacti…
TRINITY_DN42995_c0_g1	-3.07674	4.37e-12	4.96e-11	yes	down	6.97	0.12	XP_016395301.1(PREDICTED: probable E3 ubiquitin-protein ligase HERC3 isoform X1 [Sinocyclocheilus rhinocerous])	gi|126215720|sp|Q6PAV2.2|HERC4_MOUSE(RecName: Full=Probable E3 ubiquitin-protein ligase HERC4; AltName: Full=HECT domain and RCC1-like domain-containing protein 4)
TRINITY_DN38975_c0_g1	3.00579	4.37e-12	4.96e-11	yes	up	0.79	4.37	KTF72663.1(hypothetical protein cypCar_00048585, partial [Cyprinus carpio])	None
TRINITY_DN26515_c2_g2	-3.01697	4.42e-12	5.02e-11	yes	down	33.38	4.02	None	None
TRINITY_DN22711_c4_g1	-2.20684	4.48e-12	5.08e-11	yes	down	2.22	0.52	XP_023197704.1(protein ALP1-like [Xiphophorus maculatus])	gi|82181968|sp|Q6AZB8.1|HARB1_DANRE(RecName: Full=Putative nuclease HARBI1; AltName: Full=Harbinger transposase-derived nuclease)
TRINITY_DN28925_c2_g1	-1.03678	4.5e-12	5.11e-11	yes	down	63.46	29.47	XP_016362265.1(PREDICTED: NACHT, LRR and PYD domains-containing protein 12-like [Sinocyclocheilus anshuiensis])	gi|78099143|sp|Q91VI7.1|RINI_MOUSE(RecName: Full=Ribonuclease inhibitor; AltName: Full=Ribonuclease/angiogenin inhibitor 1)
TRINITY_DN44803_c0_g2	-1.91104	4.58e-12	5.19e-11	yes	down	6.5	1.73	None	None
TRINITY_DN37431_c0_g2	-1.86569	4.72e-12	5.33e-11	yes	down	2.58	2.02	XP_019200903.1(PREDICTED: uncharacterized protein LOC102082235 isoform X1 [Oreochromis niloticus])	gi|130582|sp|P10978.1|POLX_TOBAC(RecName: Full=Retrovirus-related Pol polyprotein from transposon TNT 1-94; Includes: RecName: Full=Protease; Includes: RecName: Full=Reverse transcriptase; Includes: RecName: Full=Endonuclease)
TRINITY_DN18545_c0_g1	3.58727	4.87e-12	5.5e-11	yes	up	0.13	1.67	XP_022542045.1(uncharacterized protein LOC111196914 [Astyanax mexicanus])	None
TRINITY_DN46178_c0_g1	1.20924	5.26e-12	5.93e-11	yes	up	0.51	1.25	XP_018527098.1(PREDICTED: uncharacterized protein LOC108880168 [Lates calcarifer])	None
TRINITY_DN29060_c2_g3	-2.24023	5.33e-12	6.01e-11	yes	down	1	0.22	XP_024122537.1(uncharacterized protein LOC112143031 [Oryzias melastigma])	gi|126296|sp|P08548.1|LIN1_NYCCO(RecName: Full=LINE-1 reverse transcriptase homolog)
TRINITY_DN36715_c1_g2	1.17318	5.36e-12	6.03e-11	yes	up	20.87	34.99	None	None
TRINITY_DN40841_c0_g1	-2.42466	5.47e-12	6.15e-11	yes	down	2.96	0.63	XP_016420903.1(PREDICTED: uncharacterized protein LOC107750152 [Sinocyclocheilus rhinocerous])	gi|125527|sp|P19525.2|E2AK2_HUMAN(RecName: Full=Interferon-induced, double-stranded RNA-activated protein kinase; AltName: Full=Eukaryotic translation initiation factor 2-alpha kinase 2; Short=eIF-2A protein kinase 2; AltName: Full=Interferon-inducible RNA-dependent protein kinase; AltName: Full=P1/eIF-2A protein kinase; AltName: Full=Protein kinase RNA-activated; Short=PKR; Short=Protein kinase …
TRINITY_DN30033_c1_g1	1.49876	5.56e-12	6.25e-11	yes	up	2.75	8.15	XP_018970298.1(PREDICTED: lysophospholipase-like protein 1 [Cyprinus carpio])	gi|75070628|sp|Q5R8C2.3|LYPL1_PONAB(RecName: Full=Lysophospholipase-like protein 1)
TRINITY_DN27055_c0_g3	2.30553	5.72e-12	6.42e-11	yes	up	0.36	2.4	XP_024656999.1(uncharacterized protein LOC112432775 [Maylandia zebra])	gi|146291076|sp|Q7LHG5.2|YI31B_YEAST(RecName: Full=Transposon Ty3-I Gag-Pol polyprotein; AltName: Full=Gag3-Pol3; AltName: Full=Transposon Ty3-2 TYA-TYB polyprotein; Contains: RecName: Full=Capsid protein; Short=CA; AltName: Full=p24; Contains: RecName: Full=Spacer peptide p3; Contains: RecName: Full=Nucleocapsid protein p11; Short=NC; Contains: RecName: Full=Ty3 protease; Short=PR; AltName: Full…
TRINITY_DN22727_c1_g1	-1.62343	5.8e-12	6.51e-11	yes	down	21.01	10.16	None	None
TRINITY_DN20391_c0_g1	-1.17379	5.83e-12	6.54e-11	yes	down	51.42	25.53	None	None
TRINITY_DN40358_c0_g2	1.85663	5.84e-12	6.55e-11	yes	up	6.48	14.56	XP_018979048.1(PREDICTED: uncharacterized protein LOC109110470 [Cyprinus carpio])	gi|134083|sp|P21328.1|RTJK_DROME(RecName: Full=RNA-directed DNA polymerase from mobile element jockey; AltName: Full=Reverse transcriptase)
TRINITY_DN27143_c1_g1	-3.55841	5.88e-12	6.58e-11	yes	down	1.61	0.13	None	None
TRINITY_DN37432_c1_g1	-3.55841	5.88e-12	6.58e-11	yes	down	38.36	3.61	None	None
TRINITY_DN30199_c3_g1	1.12345	5.95e-12	6.66e-11	yes	up	9.91	22.62	None	None
TRINITY_DN30921_c0_g1	-4.65293	5.96e-12	6.67e-11	yes	down	11.49	0.51	XP_016374585.1(PREDICTED: dmX-like protein 1 [Sinocyclocheilus rhinocerous])	None
TRINITY_DN27418_c2_g1	-1.88034	6.02e-12	6.73e-11	yes	down	5.51	1.63	None	None
TRINITY_DN26502_c0_g2	2.11491	6.04e-12	6.75e-11	yes	up	0.65	2.93	None	None
TRINITY_DN44708_c1_g3	-1.79788	6.09e-12	6.8e-11	yes	down	4.18	1.36	None	None
TRINITY_DN22320_c2_g2	-6.6173	6.12e-12	6.83e-11	yes	down	4.14	0	None	None
TRINITY_DN26592_c0_g1	2.56712	6.38e-12	7.11e-11	yes	up	0.54	2.73	XP_016430746.1(PREDICTED: eotaxin-like [Sinocyclocheilus rhinocerous])	gi|24212453|sp|Q91ZL1.1|CCL5_SIGHI(RecName: Full=C-C motif chemokine 5; AltName: Full=Small-inducible cytokine A5; AltName: Full=T-cell-specific protein RANTES; Flags: Precursor)
TRINITY_DN37977_c2_g2	-1.1239	6.56e-12	7.31e-11	yes	down	40.65	20.21	None	None
TRINITY_DN43013_c2_g2	-2.77719	6.74e-12	7.5e-11	yes	down	15.94	3.51	KTF77044.1(hypothetical protein cypCar_00046773, partial [Cyprinus carpio])	gi|224471836|sp|Q8TCB0.2|IFI44_HUMAN(RecName: Full=Interferon-induced protein 44; Short=p44; AltName: Full=Microtubule-associated protein 44)
TRINITY_DN24070_c2_g2	1.71551	6.8e-12	7.57e-11	yes	up	0.53	1.89	KTG31253.1(hypothetical protein cypCar_00018218 [Cyprinus carpio])	gi|2500170|sp|O08773.1|RGS14_RAT(RecName: Full=Regulator of G-protein signaling 14; Short=RGS14)
TRINITY_DN25274_c0_g1	2.64948	6.96e-12	7.74e-11	yes	up	0.87	5.71	XP_018933313.1(PREDICTED: cytochrome c oxidase subunit 6A, mitochondrial-like [Cyprinus carpio])	gi|5921902|sp|O13082.1|COX6A_CYPCA(RecName: Full=Cytochrome c oxidase subunit 6A, mitochondrial; AltName: Full=Cytochrome c oxidase polypeptide VIa; Flags: Precursor)
TRINITY_DN25288_c1_g1	-2.99921	7.03e-12	7.81e-11	yes	down	14.42	4.89	None	None
TRINITY_DN19846_c0_g1	2.98622	7.07e-12	7.86e-11	yes	up	0.41	3.48	AHI42560.1(parvalbumin isoform 1b [Campylomormyrus compressirostris])	gi|124012139|sp|P09227.2|PRVA_CYPCA(RecName: Full=Parvalbumin alpha; AltName: Full=A1)
TRINITY_DN19522_c0_g1	1.56023	7.21e-12	7.99e-11	yes	up	7.57	18.36	XP_016373032.1(PREDICTED: selenoprotein H-like, partial [Sinocyclocheilus rhinocerous])	gi|172044634|sp|Q3UQA7.2|SELH_MOUSE(RecName: Full=Selenoprotein H; Short=SelH)
TRINITY_DN26400_c2_g1	2.08648	7.21e-12	7.99e-11	yes	up	5.53	8.09	KTF87056.1(hypothetical protein cypCar_00038766 [Cyprinus carpio])	None
TRINITY_DN38524_c0_g4	-5.58078	7.21e-12	7.99e-11	yes	down	1.01	0.02	XP_023191398.1(uncharacterized protein LOC111608951 [Xiphophorus maculatus])	gi|130407|sp|P10394.1|POL4_DROME(RecName: Full=Retrovirus-related Pol polyprotein from transposon 412; Includes: RecName: Full=Protease; Includes: RecName: Full=Reverse transcriptase; Includes: RecName: Full=Endonuclease)
TRINITY_DN17361_c0_g1	-4.13668	7.34e-12	8.12e-11	yes	down	0.59	0.06	XP_019200903.1(PREDICTED: uncharacterized protein LOC102082235 isoform X1 [Oreochromis niloticus])	gi|13124684|sp|P04146.3|COPIA_DROME(RecName: Full=Copia protein; AltName: Full=Gag-int-pol protein; Contains: RecName: Full=Copia VLP protein; Contains: RecName: Full=Copia protease)
TRINITY_DN24284_c3_g2	-4.13668	7.34e-12	8.12e-11	yes	down	9.28	0.41	None	None
TRINITY_DN39489_c1_g1	-4.13668	7.34e-12	8.12e-11	yes	down	10.5	0.88	None	None
TRINITY_DN44484_c0_g1	-4.13668	7.34e-12	8.12e-11	yes	down	8.54	0.36	None	None
TRINITY_DN48644_c3_g1	2.10412	7.64e-12	8.44e-11	yes	up	6.6	32.9	KTF77807.1(hypothetical protein cypCar_00033725 [Cyprinus carpio])	gi|1346272|sp|P47776.1|HEP2_RABIT(RecName: Full=Heparin cofactor 2; AltName: Full=Heparin cofactor II; Short=HC-II; AltName: Full=Protease inhibitor leuserpin-2; AltName: Full=Serpin D1; Flags: Precursor)
TRINITY_DN19757_c0_g3	5.28959	7.81e-12	8.63e-11	yes	up	0.05	1.89	XP_017564809.1(PREDICTED: uncharacterized protein LOC108434293 isoform X2 [Pygocentrus nattereri])	None
TRINITY_DN29103_c0_g2	6.28959	7.86e-12	8.68e-11	yes	up	0	3.14	ABW87635.1(slow myosin heavy chain 3, partial [Danio rerio])	gi|81871557|sp|Q91Z83.1|MYH7_MOUSE(RecName: Full=Myosin-7; AltName: Full=Myosin heavy chain 7; AltName: Full=Myosin heavy chain slow isoform; Short=MyHC-slow; AltName: Full=Myosin heavy chain, cardiac muscle beta isoform; Short=MyHC-beta)
TRINITY_DN40392_c0_g1	1.77501	7.95e-12	8.77e-11	yes	up	0.6	2.15	XP_016414843.1(PREDICTED: ATP-dependent 6-phosphofructokinase, muscle type-like [Sinocyclocheilus rhinocerous])	gi|122143188|sp|Q0IIG5.1|PFKAM_BOVIN(RecName: Full=ATP-dependent 6-phosphofructokinase, muscle type; Short=ATP-PFK; Short=PFK-M; AltName: Full=6-phosphofructokinase type A; AltName: Full=Phosphofructo-1-kinase isozyme A; Short=PFK-A; AltName: Full=Phosphohexokinase)
TRINITY_DN22523_c0_g3	2.41358	8.01e-12	8.84e-11	yes	up	1.99	7.63	XP_018939907.1(PREDICTED: plakophilin-1-like, partial [Cyprinus carpio])	None
TRINITY_DN34514_c0_g1	4.37705	8.17e-12	9e-11	yes	up	0.06	1.39	XP_016096958.1(PREDICTED: calsequestrin-1-like [Sinocyclocheilus grahami])	gi|341940315|sp|P19633.2|CASQ1_RAT(RecName: Full=Calsequestrin-1; AltName: Full=Aspartactin; AltName: Full=Calsequestrin, skeletal muscle isoform; AltName: Full=Laminin-binding protein; Flags: Precursor)
TRINITY_DN25113_c2_g1	-2.52562	8.22e-12	9.05e-11	yes	down	7.31	3.6	None	None
TRINITY_DN48925_c4_g2	-3.54178	8.45e-12	9.3e-11	yes	down	6.37	0.33	XP_016104299.1(PREDICTED: uncharacterized protein LOC107563843 [Sinocyclocheilus grahami])	None
TRINITY_DN38787_c2_g2	-2.0212	8.49e-12	9.35e-11	yes	down	4.49	1.36	None	None
TRINITY_DN15247_c0_g1	-2.35766	8.55e-12	9.41e-11	yes	down	25.27	5.13	None	None
TRINITY_DN34112_c0_g3	-2.93281	8.57e-12	9.43e-11	yes	down	4.33	0.59	None	None
TRINITY_DN19347_c1_g1	1.84455	8.83e-12	9.7e-11	yes	up	0.81	3.03	NP_998380.1(aldolase a, fructose-bisphosphate, b [Danio rerio])	gi|576011087|sp|B5DGM7.1|ALDOA_SALSA(RecName: Full=Fructose-bisphosphate aldolase A; AltName: Full=Muscle-type aldolase; AltName: Allergen=Sal s 3.0101)
TRINITY_DN27418_c0_g2	-1.68442	8.84e-12	9.7e-11	yes	down	1.6	0.53	XP_023249075.1(uncharacterized protein LOC111644431 [Seriola lalandi dorsalis])	None
TRINITY_DN49013_c1_g3	2.28959	9.1e-12	9.99e-11	yes	up	3.95	20.18	None	None
TRINITY_DN43078_c2_g1	2.47721	9.23e-12	1.01e-10	yes	up	1.71	7.41	None	None
TRINITY_DN35975_c0_g1	-2.11166	9.26e-12	1.02e-10	yes	down	2.65	0.6	XP_012693106.1(PREDICTED: exostosin-1c [Clupea harengus])	gi|68052297|sp|Q5IGR6.1|EXT1C_DANRE(RecName: Full=Exostosin-1c; AltName: Full=Glucuronosyl-N-acetylglucosaminyl-proteoglycan/N-acetylglucosaminyl-proteoglycan 4-alpha-N-acetylglucosaminyltransferase 1c; AltName: Full=Multiple exostoses protein 1 homolog c)
TRINITY_DN42708_c1_g1	1.72699	9.38e-12	1.03e-10	yes	up	3.1	3.58	XP_017579702.1(PREDICTED: golgin subfamily A member 7B-like isoform X2 [Pygocentrus nattereri])	gi|109821405|sp|Q2TAP0.2|GOG7B_HUMAN(RecName: Full=Golgin subfamily A member 7B)
TRINITY_DN49113_c9_g2	-1.98988	9.41e-12	1.03e-10	yes	down	1.78	0.47	AAI71710.1(Breast cancer 2, early onset [Danio rerio])	gi|75046422|sp|Q864S8.2|BRCA2_FELCA(RecName: Full=Breast cancer type 2 susceptibility protein homolog; AltName: Full=Fanconi anemia group D1 protein homolog)
TRINITY_DN20985_c0_g1	1.84347	1.04e-11	1.14e-10	yes	up	3.99	17.17	None	None
TRINITY_DN46909_c2_g1	-1.26143	1.07e-11	1.17e-10	yes	down	4.41	1.92	XP_016374410.1(PREDICTED: thymocyte nuclear protein 1 [Sinocyclocheilus rhinocerous])	gi|82187203|sp|Q6PFL8.1|THYN1_DANRE(RecName: Full=Thymocyte nuclear protein 1)
TRINITY_DN22946_c2_g1	-5.55615	1.09e-11	1.19e-10	yes	down	21.81	1.86	None	None
TRINITY_DN23543_c0_g1	5.26961	1.1e-11	1.2e-10	yes	up	0.39	15.83	None	None
TRINITY_DN30831_c0_g4	-2.45457	1.11e-11	1.21e-10	yes	down	2.78	0.53	BAF37936.1(Tc1-like transporase [Oncorhynchus mykiss])	gi|141446|sp|P03934.1|TC1A_CAEEL(RecName: Full=Transposable element Tc1 transposase)
TRINITY_DN48843_c3_g1	-1.10435	1.13e-11	1.22e-10	yes	down	40.76	16	None	None
TRINITY_DN44170_c3_g3	-2.13973	1.13e-11	1.23e-10	yes	down	5.31	0.86	None	None
TRINITY_DN19053_c0_g1	6.26442	1.17e-11	1.27e-10	yes	up	0	7.63	ABY71044.1(fast skeletal myosin 30C-type S1, partial [Ctenopharyngodon idella])	gi|13431711|sp|Q90339.2|MYSS_CYPCA(RecName: Full=Myosin heavy chain, fast skeletal muscle)
TRINITY_DN36882_c1_g1	1.86217	1.19e-11	1.29e-10	yes	up	0.41	3	XP_017212578.2(death domain-containing protein 1 [Danio rerio])	gi|300669694|sp|Q6ZMT9.3|DTHD1_HUMAN(RecName: Full=Death domain-containing protein 1)
TRINITY_DN37721_c0_g1	1.18565	1.22e-11	1.32e-10	yes	up	14.58	32.53	XP_016114831.1(PREDICTED: noelin-2-like [Sinocyclocheilus grahami])	None
TRINITY_DN34633_c0_g1	-1.37668	1.22e-11	1.32e-10	yes	down	12.35	5.96	NP_001007782.1(ras-dva small GTPase [Danio rerio])	gi|51702794|sp|P63033.1|RHES_RAT(RecName: Full=GTP-binding protein Rhes; AltName: Full=Ras homolog enriched in striatum; AltName: Full=SE6C; Flags: Precursor >gi|51702799|sp|P63032.1|RHES_MOUSE RecName: Full=GTP-binding protein Rhes; AltName: Full=Ras homolog enriched in striatum; Flags: Precursor)
TRINITY_DN31542_c3_g4	-2.51039	1.24e-11	1.34e-10	yes	down	1.19	0.22	XP_016361464.1(PREDICTED: interleukin-21 receptor-like isoform X1 [Sinocyclocheilus anshuiensis])	gi|20455002|sp|Q9JHX3.1|IL21R_MOUSE(RecName: Full=Interleukin-21 receptor; Short=IL-21 receptor; Short=IL-21R; AltName: Full=Lymphocyte receptor beta; Short=LR-beta; AltName: Full=Novel cytokine receptor 8; Short=NR8; AltName: Full=Novel interleukin receptor; AltName: CD_antigen=CD360; Flags: Precursor)
TRINITY_DN27619_c2_g2	-1.75835	1.27e-11	1.37e-10	yes	down	1.78	0.55	XP_016364937.1(PREDICTED: uncharacterized protein LOC107705922 [Sinocyclocheilus rhinocerous])	gi|38372262|sp|Q8K3K9.1|GIMA4_RAT(RecName: Full=GTPase IMAP family member 4; AltName: Full=Immunity-associated nucleotide 1 protein; Short=IAN-1; AltName: Full=Immunity-associated protein 4)
TRINITY_DN29031_c0_g2	6.25921	1.27e-11	1.37e-10	yes	up	0	7.62	XP_018921335.1(PREDICTED: LOW QUALITY PROTEIN: myosin heavy chain, fast skeletal muscle-like [Cyprinus carpio])	gi|13431711|sp|Q90339.2|MYSS_CYPCA(RecName: Full=Myosin heavy chain, fast skeletal muscle)
TRINITY_DN35652_c1_g1	6.25921	1.27e-11	1.37e-10	yes	up	0	3.31	XP_016108961.1(PREDICTED: sarcoplasmic/endoplasmic reticulum calcium ATPase 1-like isoform X1 [Sinocyclocheilus grahami])	gi|66774021|sp|Q8R429.1|AT2A1_MOUSE(RecName: Full=Sarcoplasmic/endoplasmic reticulum calcium ATPase 1; Short=SERCA1; Short=SR Ca(2+)-ATPase 1; AltName: Full=Calcium pump 1; AltName: Full=Calcium-transporting ATPase sarcoplasmic reticulum type, fast twitch skeletal muscle isoform; AltName: Full=Endoplasmic reticulum class 1/2 Ca(2+) ATPase)
TRINITY_DN25249_c0_g2	2.3965	1.29e-11	1.39e-10	yes	up	0.24	6.04	KKF31404.1(putative AC9 transposase [Larimichthys crocea])	gi|136140|sp|P03010.1|TRAC9_MAIZE(RecName: Full=Putative AC9 transposase)
TRINITY_DN28426_c0_g1	1.60644	1.32e-11	1.43e-10	yes	up	5.66	19.2	None	None
TRINITY_DN41782_c2_g1	1.23535	1.36e-11	1.46e-10	yes	up	5.63	12.1	XP_017563248.1(PREDICTED: ADP-ribosylation factor 3 isoform X1 [Pygocentrus nattereri])	gi|47117640|sp|P61206.2|ARF3_RAT(RecName: Full=ADP-ribosylation factor 3; AltName: Full=Liver regeneration-related protein LRRG202 >gi|47117657|sp|P61204.2|ARF3_HUMAN RecName: Full=ADP-ribosylation factor 3 >gi|47117658|sp|P61205.2|ARF3_MOUSE RecName: Full=ADP-ribosylation factor 3 >gi|47117659|sp|P61207.2|ARF3_TAKRU RecName: Full=ADP-ribosylation factor 3 >gi|68565018|sp|Q5R5P7.3|ARF3_PONAB RecN…
TRINITY_DN34275_c0_g1	-6.56254	1.42e-11	1.53e-10	yes	down	21.2	0	None	None
TRINITY_DN27517_c2_g1	-4.10273	1.43e-11	1.54e-10	yes	down	3.88	0.28	None	None
TRINITY_DN37053_c0_g1	-4.10273	1.43e-11	1.54e-10	yes	down	4.85	0.29	None	None
TRINITY_DN20342_c3_g2	-3.16045	1.47e-11	1.58e-10	yes	down	3	0.78	None	None
TRINITY_DN20008_c0_g1	-3.16045	1.47e-11	1.58e-10	yes	down	0.95	0.11	XP_016332753.1(PREDICTED: membrane-associated transporter protein-like [Sinocyclocheilus anshuiensis])	gi|17368198|sp|P58355.1|S45A2_MOUSE(RecName: Full=Membrane-associated transporter protein; AltName: Full=Melanoma antigen AIM1; Short=Protein AIM-1; AltName: Full=Protein underwhite; AltName: Full=Solute carrier family 45 member 2)
TRINITY_DN24111_c0_g3	2.08605	1.47e-11	1.58e-10	yes	up	10.69	46.88	XP_018956450.1(PREDICTED: uncharacterized protein LOC109086586 [Cyprinus carpio])	None
TRINITY_DN22276_c0_g2	-2.64115	1.47e-11	1.58e-10	yes	down	1.04	0.17	XP_008293872.1(PREDICTED: uncharacterized protein LOC103367573 [Stegastes partitus])	gi|130407|sp|P10394.1|POL4_DROME(RecName: Full=Retrovirus-related Pol polyprotein from transposon 412; Includes: RecName: Full=Protease; Includes: RecName: Full=Reverse transcriptase; Includes: RecName: Full=Endonuclease)
TRINITY_DN31702_c2_g1	-1.02001	1.5e-11	1.6e-10	yes	down	8.09	4.18	None	None
TRINITY_DN36350_c1_g2	-2.3372	1.52e-11	1.63e-10	yes	down	0.51	0.1	XP_021331267.1(uncharacterized protein LOC110439519 [Danio rerio])	gi|130405|sp|P04323.1|POL3_DROME(RecName: Full=Retrovirus-related Pol polyprotein from transposon 17.6; Includes: RecName: Full=Protease; Includes: RecName: Full=Reverse transcriptase; Includes: RecName: Full=Endonuclease)
TRINITY_DN48534_c2_g1	-2.3372	1.52e-11	1.63e-10	yes	down	7.9	0.72	KTF80781.1(hypothetical protein cypCar_00032346 [Cyprinus carpio])	gi|146345441|sp|P20702.3|ITAX_HUMAN(RecName: Full=Integrin alpha-X; AltName: Full=CD11 antigen-like family member C; AltName: Full=Leu M5; AltName: Full=Leukocyte adhesion glycoprotein p150,95 alpha chain; AltName: Full=Leukocyte adhesion receptor p150,95; AltName: CD_antigen=CD11c; Flags: Precursor)
TRINITY_DN25167_c0_g10	-2.71859	1.55e-11	1.66e-10	yes	down	0.83	0.13	XP_019218710.1(PREDICTED: uncharacterized protein LOC109203576 [Oreochromis niloticus])	gi|130407|sp|P10394.1|POL4_DROME(RecName: Full=Retrovirus-related Pol polyprotein from transposon 412; Includes: RecName: Full=Protease; Includes: RecName: Full=Reverse transcriptase; Includes: RecName: Full=Endonuclease)
TRINITY_DN45045_c1_g3	-2.71859	1.55e-11	1.66e-10	yes	down	6.22	0.52	XP_020787740.1(LOW QUALITY PROTEIN: uncharacterized protein LOC110166778 [Boleophthalmus pectinirostris])	None
TRINITY_DN42126_c0_g2	-3.0233	1.57e-11	1.68e-10	yes	down	8.71	1.3	XP_005170633.1(actin-like 6B isoform X1 [Danio rerio])	gi|23396462|sp|O94805.1|ACL6B_HUMAN(RecName: Full=Actin-like protein 6B; AltName: Full=53 kDa BRG1-associated factor B; AltName: Full=Actin-related protein Baf53b; AltName: Full=ArpNalpha; AltName: Full=BRG1-associated factor 53B; Short=BAF53B)
TRINITY_DN34629_c0_g1	-2.09374	1.6e-11	1.71e-10	yes	down	1.73	0.42	XP_005171873.1(porphobilinogen deaminase isoform X1 [Danio rerio])	gi|1170217|sp|P08397.2|HEM3_HUMAN(RecName: Full=Porphobilinogen deaminase; Short=PBG-D; AltName: Full=Hydroxymethylbilane synthase; Short=HMBS; AltName: Full=Pre-uroporphyrinogen synthase)
TRINITY_DN47316_c3_g1	1.88095	1.6e-11	1.71e-10	yes	up	9.38	16.13	None	None
TRINITY_DN25502_c0_g1	-2.90681	1.61e-11	1.72e-10	yes	down	6.41	0.31	XP_016309864.1(PREDICTED: mucin-15-like [Sinocyclocheilus anshuiensis])	None
TRINITY_DN32969_c1_g1	-1.89628	1.63e-11	1.74e-10	yes	down	2.02	0.57	XP_016091607.1(PREDICTED: aldehyde dehydrogenase family 1 member A3-like [Sinocyclocheilus grahami])	gi|52782793|sp|Q9JHW9.1|AL1A3_MOUSE(RecName: Full=Aldehyde dehydrogenase family 1 member A3; AltName: Full=Aldehyde dehydrogenase 6; AltName: Full=Retinaldehyde dehydrogenase 3; Short=RALDH-3; Short=RalDH3)
TRINITY_DN28394_c0_g1	3.28959	1.72e-11	1.84e-10	yes	up	0.05	0.47	XP_020555459.2(uncharacterized protein K02A2.6-like [Oryzias latipes])	gi|134034966|sp|Q99315.3|YG31B_YEAST(RecName: Full=Transposon Ty3-G Gag-Pol polyprotein; AltName: Full=Gag3-Pol3; AltName: Full=Transposon Ty3-1 TYA-TYB polyprotein; Contains: RecName: Full=Capsid protein; Short=CA; AltName: Full=p24; Contains: RecName: Full=Spacer peptide p3; Contains: RecName: Full=Nucleocapsid protein p11; Short=NC; Contains: RecName: Full=Ty3 protease; Short=PR; AltName: Full…
TRINITY_DN40358_c0_g1	-2.02656	1.8e-11	1.91e-10	yes	down	11.55	3.07	None	None
TRINITY_DN48062_c2_g1	-1.36676	1.85e-11	1.97e-10	yes	down	11.09	3.6	None	None
TRINITY_DN22167_c2_g2	2.11966	1.87e-11	1.98e-10	yes	up	0.44	2.4	XP_018961089.1(PREDICTED: bcl-2-related ovarian killer protein homolog A [Cyprinus carpio])	gi|82182172|sp|Q6DC66.1|BOKA_DANRE(RecName: Full=Bcl-2-related ovarian killer protein homolog A; Short=zBok1)
TRINITY_DN32207_c0_g1	-2.69222	1.9e-11	2.02e-10	yes	down	19.42	8.42	None	None
TRINITY_DN13528_c0_g1	-6.5433	1.9e-11	2.02e-10	yes	down	5.47	0	XP_016387853.1(PREDICTED: LOW QUALITY PROTEIN: cyclin-T2-like [Sinocyclocheilus rhinocerous])	gi|62906880|sp|O60583.2|CCNT2_HUMAN(RecName: Full=Cyclin-T2; Short=CycT2)
TRINITY_DN23327_c0_g2	-6.5433	1.9e-11	2.02e-10	yes	down	11.29	0	XP_016107282.1(PREDICTED: SLAM family member 5-like [Sinocyclocheilus grahami])	None
TRINITY_DN23607_c1_g2	-6.5433	1.9e-11	2.02e-10	yes	down	1.06	0	XP_016295987.1(PREDICTED: olfactory receptor 10G4-like [Sinocyclocheilus anshuiensis])	gi|38372788|sp|Q8NGY5.1|OR6N1_HUMAN(RecName: Full=Olfactory receptor 6N1)
TRINITY_DN25355_c4_g1	-6.5433	1.9e-11	2.02e-10	yes	down	21.42	0	None	None
TRINITY_DN42464_c0_g1	-6.5433	1.9e-11	2.02e-10	yes	down	1.47	0	XP_016354411.1(PREDICTED: homeobox protein cut-like 2 [Sinocyclocheilus anshuiensis])	gi|296439379|sp|P39880.3|CUX1_HUMAN(RecName: Full=Homeobox protein cut-like 1; AltName: Full=CCAAT displacement protein; Short=CDP; AltName: Full=Homeobox protein cux-1)
TRINITY_DN33995_c2_g2	3.09694	1.94e-11	2.05e-10	yes	up	1.1	6.4	None	None
TRINITY_DN27017_c0_g1	-1.96675	1.96e-11	2.07e-10	yes	down	2.37	0.49	KTF82643.1(hypothetical protein cypCar_00032560 [Cyprinus carpio])	gi|126638|sp|P28301.1|LYOX_MOUSE(RecName: Full=Protein-lysine 6-oxidase; AltName: Full=Lysyl oxidase; AltName: Full=Ras excision protein; Flags: Precursor)
TRINITY_DN33711_c0_g2	-2.23651	1.97e-11	2.09e-10	yes	down	9.29	1.65	XP_022530565.1(uncharacterized protein LOC111193553 [Astyanax mexicanus])	None
TRINITY_DN26286_c0_g2	6.22819	2.05e-11	2.16e-10	yes	up	0	6.96	None	None
TRINITY_DN38360_c1_g3	-1.91313	2.07e-11	2.18e-10	yes	down	1.62	0.45	XP_016387758.1(PREDICTED: nuclear pore membrane glycoprotein 210-like [Sinocyclocheilus rhinocerous])	gi|97180293|sp|Q9QY81.2|PO210_MOUSE(RecName: Full=Nuclear pore membrane glycoprotein 210; Short=Nuclear pore protein gp210; AltName: Full=Nuclear envelope pore membrane protein POM 210; Short=POM210; AltName: Full=Nucleoporin Nup210; AltName: Full=Pore membrane protein of 210 kDa; Flags: Precursor)
TRINITY_DN24542_c0_g2	2.81315	2.07e-11	2.19e-10	yes	up	2.37	19.68	None	None
TRINITY_DN49215_c5_g1	2.81585	2.12e-11	2.23e-10	yes	up	0.38	2.83	KKF31091.1(Retrotransposon-derived protein PEG10 [Larimichthys crocea])	gi|172045711|sp|Q7TN75.2|PEG10_MOUSE(RecName: Full=Retrotransposon-derived protein PEG10; AltName: Full=Embryonal carcinoma differentiation regulated protein; AltName: Full=Mammalian retrotransposon-derived protein 2; AltName: Full=Myelin expression factor 3; Short=MyEF-3; AltName: Full=Myelin expression factor 3-like protein 1; Short=MEF3-like protein 1; AltName: Full=Paternally expressed gene 1…
TRINITY_DN34152_c1_g1	4.32638	2.12e-11	2.23e-10	yes	up	0.74	15.34	XP_019118029.1(PREDICTED: myosin heavy chain, fast skeletal muscle [Larimichthys crocea])	gi|13431711|sp|Q90339.2|MYSS_CYPCA(RecName: Full=Myosin heavy chain, fast skeletal muscle)
TRINITY_DN40568_c0_g5	-1.7808	2.13e-11	2.24e-10	yes	down	12.22	5.28	None	None
TRINITY_DN14876_c0_g1	5.22819	2.22e-11	2.33e-10	yes	up	0.09	3.58	None	None
TRINITY_DN37250_c1_g1	1.37448	2.23e-11	2.34e-10	yes	up	0.59	1.6	XP_016379614.1(PREDICTED: glycine receptor subunit alphaZ1-like [Sinocyclocheilus rhinocerous])	gi|6647527|sp|O93430.1|GLRA1_DANRE(RecName: Full=Glycine receptor subunit alphaZ1; Flags: Precursor)
TRINITY_DN38049_c0_g1	-4.58078	2.24e-11	2.35e-10	yes	down	12.89	0.96	None	None
TRINITY_DN22681_c3_g2	2.25716	2.3e-11	2.41e-10	yes	up	0.36	1.97	None	None
TRINITY_DN38928_c0_g1	-1.29538	2.3e-11	2.41e-10	yes	down	4.31	14.69	XP_022520020.1(uncharacterized protein LOC111190594 isoform X1 [Astyanax mexicanus])	None
TRINITY_DN48617_c3_g2	5.22473	2.35e-11	2.46e-10	yes	up	0.6	13.15	None	None
TRINITY_DN31944_c0_g1	-2.15099	2.37e-11	2.49e-10	yes	down	8.42	1.12	KKF09339.1(RNA-directed DNA polymerase from mobile element jockey [Larimichthys crocea])	gi|134082|sp|P21329.1|RTJK_DROFU(RecName: Full=RNA-directed DNA polymerase from mobile element jockey; AltName: Full=Reverse transcriptase)
TRINITY_DN23849_c0_g3	1.64229	2.39e-11	2.51e-10	yes	up	14.01	42.73	None	None
TRINITY_DN38431_c0_g1	-1.98725	2.46e-11	2.57e-10	yes	down	3.01	0.74	AEM60431.1(warm-temperature-acclimation-associated 65-kDa protein [Misgurnus mizolepis])	gi|123911027|sp|Q6PHG2.2|HEMO_DANRE(RecName: Full=Hemopexin; Flags: Precursor)
TRINITY_DN44240_c0_g1	-1.05956	2.52e-11	2.64e-10	yes	down	9.48	4.63	None	None
TRINITY_DN17386_c0_g1	-5.50483	2.53e-11	2.64e-10	yes	down	1.16	0.03	XP_013856319.1(PREDICTED: uncharacterized protein LOC106512198, partial [Austrofundulus limnaeus])	None
TRINITY_DN43715_c1_g2	-3.29538	2.54e-11	2.65e-10	yes	down	4.55	0.68		gi|110816488|sp|Q3BAI2.1|YCX91_PHAAO(RecName: Full=Uncharacterized protein ORF91 (chloroplast) [Phalaenopsis aphrodite subsp. formosana])
TRINITY_DN26761_c0_g2	-1.02158	2.67e-11	2.79e-10	yes	down	54.55	25.39	None	None
TRINITY_DN33566_c0_g2	-1.37748	2.67e-11	2.79e-10	yes	down	22.27	12.42	None	None
TRINITY_DN35035_c0_g1	-2.6173	2.69e-11	2.81e-10	yes	down	11.68	1.05	None	None
TRINITY_DN28869_c0_g1	-1.79288	2.75e-11	2.87e-10	yes	down	27.89	8.19	None	None
TRINITY_DN41107_c1_g3	-2.07559	2.75e-11	2.87e-10	yes	down	13.9	6.87	XP_008286975.1(PREDICTED: N-acylneuraminate cytidylyltransferase [Stegastes partitus])	gi|68059546|sp|Q90WG6.1|NEUA_ONCMY(RecName: Full=N-acylneuraminate cytidylyltransferase; AltName: Full=CMP-N-acetylneuraminic acid synthase; Short=CMP-NeuNAc synthase)
TRINITY_DN29881_c0_g4	2.30666	2.78e-11	2.9e-10	yes	up	9.57	48.64	XP_016127221.1(PREDICTED: cystatin-B-like [Sinocyclocheilus grahami])	gi|952543428|sp|B2Z449.1|CYTB_PAROL(RecName: Full=Cystatin-B; AltName: Full=PoCystatin-B; AltName: Full=Stefin-B)
TRINITY_DN46556_c1_g2	-1.6373	2.79e-11	2.91e-10	yes	down	2.03	0.68	XP_023806192.1(uncharacterized protein LOC111946695 [Oryzias latipes])	None
TRINITY_DN34155_c0_g1	-2.1829	2.86e-11	2.98e-10	yes	down	1.43	4.01	XP_016359198.1(PREDICTED: protein-cysteine N-palmitoyltransferase HHAT-like protein isoform X2 [Sinocyclocheilus anshuiensis])	gi|23396970|sp|Q9HCP6.1|HHATL_HUMAN(RecName: Full=Protein-cysteine N-palmitoyltransferase HHAT-like protein; AltName: Full=Glycerol uptake/transporter homolog; AltName: Full=Hedgehog acyltransferase-like protein)
TRINITY_DN30891_c0_g1	-2.69393	2.87e-11	2.98e-10	yes	down	5.17	0.86	None	None
TRINITY_DN35107_c0_g2	-1.17928	2.89e-11	3e-10	yes	down	13.63	9.7	XP_016369323.1(PREDICTED: uncharacterized protein LOC107709382 [Sinocyclocheilus rhinocerous])	None
TRINITY_DN26100_c0_g1	1.08199	2.96e-11	3.08e-10	yes	up	3.82	10.87	XP_016376231.1(PREDICTED: tumor necrosis factor receptor superfamily member 11B-like [Sinocyclocheilus rhinocerous])	gi|21264085|sp|O08712.1|TR11B_MOUSE(RecName: Full=Tumor necrosis factor receptor superfamily member 11B; AltName: Full=Osteoclastogenesis inhibitory factor; AltName: Full=Osteoprotegerin; Flags: Precursor)
TRINITY_DN42866_c1_g1	-1.13134	2.99e-11	3.1e-10	yes	down	8.85	4.65	XP_018977021.1(PREDICTED: putative E3 ubiquitin-protein ligase UBR7 [Cyprinus carpio])	gi|37999674|sp|Q8BU04.1|UBR7_MOUSE(RecName: Full=Putative E3 ubiquitin-protein ligase UBR7; AltName: Full=N-recognin-7)
TRINITY_DN30037_c1_g4	-2.31225	3.03e-11	3.15e-10	yes	down	45.23	12.69	None	None
TRINITY_DN27056_c0_g1	5.20893	3.05e-11	3.16e-10	yes	up	0.31	12.91	KTG03273.1(hypothetical protein cypCar_00046661 [Cyprinus carpio])	None
TRINITY_DN45710_c1_g1	1.78223	3.08e-11	3.19e-10	yes	up	4.8	17.7	XP_016382990.1(PREDICTED: uncharacterized protein LOC107719949 [Sinocyclocheilus rhinocerous])	gi|82234804|sp|Q68EV1.1|CD276_XENLA(RecName: Full=CD276 antigen homolog; AltName: CD_antigen=CD276; Flags: Precursor)
TRINITY_DN33232_c2_g1	1.2139	3.26e-11	3.37e-10	yes	up	6.52	13.09	XP_016091536.1(PREDICTED: ribokinase-like [Sinocyclocheilus grahami])	gi|20139730|sp|Q9H477.1|RBSK_HUMAN(RecName: Full=Ribokinase; Short=RK)
TRINITY_DN26102_c0_g1	3.07386	3.27e-11	3.38e-10	yes	up	0.16	1.4	XP_016316811.1(PREDICTED: NADPH oxidase organizer 1-like [Sinocyclocheilus anshuiensis])	gi|74751269|sp|Q8NFA2.1|NOXO1_HUMAN(RecName: Full=NADPH oxidase organizer 1; AltName: Full=NADPH oxidase regulatory protein; AltName: Full=Nox organizer 1; AltName: Full=Nox-organizing protein 1; AltName: Full=SH3 and PX domain-containing protein 5)
TRINITY_DN27038_c0_g1	6.19648	3.31e-11	3.42e-10	yes	up	0	25.61	XP_020496539.1(myosin heavy chain, fast skeletal muscle-like [Labrus bergylta])	gi|13431711|sp|Q90339.2|MYSS_CYPCA(RecName: Full=Myosin heavy chain, fast skeletal muscle)
TRINITY_DN44278_c0_g2	-6.50483	3.37e-11	3.48e-10	yes	down	3.34	0	XP_018962615.1(PREDICTED: natural killer cell receptor 2B4-like, partial [Cyprinus carpio])	None
TRINITY_DN21967_c0_g2	-3.47648	3.37e-11	3.48e-10	yes	down	36.14	2.72	None	None
TRINITY_DN24332_c0_g1	2.24167	3.54e-11	3.65e-10	yes	up	2.73	29.19	XP_016111830.1(PREDICTED: uncharacterized protein LOC107570143 [Sinocyclocheilus grahami])	None
TRINITY_DN34294_c0_g1	-2.06699	3.55e-11	3.66e-10	yes	down	2.85	0.65	None	None
TRINITY_DN30133_c0_g1	1.33374	3.57e-11	3.68e-10	yes	up	39.33	43.63		gi|1168968|sp|Q09167.1|SRSF5_RAT(RecName: Full=Serine/arginine-rich splicing factor 5; AltName: Full=Delayed-early protein HRS; AltName: Full=Insulin-induced growth response protein CL-4; AltName: Full=Pre-mRNA-splicing factor SRP40; AltName: Full=Splicing factor, arginine/serine-rich 5 >gi|410516929|sp|O35326.2|SRSF5_MOUSE RecName: Full=Serine/arginine-rich splicing factor 5; AltName: Full=Delay…
TRINITY_DN22510_c0_g2	5.19616	3.76e-11	3.87e-10	yes	up	2.91	50.95	XP_020498120.1(myosin heavy chain, fast skeletal muscle-like [Labrus bergylta])	gi|13431711|sp|Q90339.2|MYSS_CYPCA(RecName: Full=Myosin heavy chain, fast skeletal muscle)
TRINITY_DN26235_c0_g1	1.61151	3.79e-11	3.89e-10	yes	up	5.05	16.15	None	None
TRINITY_DN48583_c2_g1	-1.91814	3.91e-11	4.01e-10	yes	down	6.32	3.33	XP_018925308.1(PREDICTED: gastrula zinc finger protein XlCGF26.1-like [Cyprinus carpio])	gi|74759999|sp|Q8N859.1|ZN713_HUMAN(RecName: Full=Zinc finger protein 713)
TRINITY_DN42211_c1_g1	-1.40727	4.05e-11	4.15e-10	yes	down	12.06	1.4	XP_018967000.1(PREDICTED: solute carrier organic anion transporter family member 1C1-like [Cyprinus carpio])	gi|27734564|sp|Q9NYB5.1|SO1C1_HUMAN(RecName: Full=Solute carrier organic anion transporter family member 1C1; AltName: Full=Organic anion transporter F; Short=OATP-F; AltName: Full=Organic anion transporter polypeptide-related protein 5; Short=OAT-RP-5; Short=OATPRP5; AltName: Full=Organic anion-transporting polypeptide 14; Short=OATP-14; AltName: Full=Solute carrier family 21 member 14; AltName:…
TRINITY_DN21228_c3_g2	4.28959	4.16e-11	4.26e-10	yes	up	1	20.2	None	None
TRINITY_DN23026_c0_g2	4.28959	4.16e-11	4.26e-10	yes	up	0.93	26.13	None	None
TRINITY_DN32749_c2_g1	4.28959	4.16e-11	4.26e-10	yes	up	0.03	0.69	XP_016396647.1(PREDICTED: uncharacterized protein LOC107730346 isoform X2 [Sinocyclocheilus rhinocerous])	None
TRINITY_DN22263_c0_g1	3.48598	4.18e-11	4.27e-10	yes	up	0.21	2.44	XP_016133116.1(PREDICTED: heat shock protein beta-11 [Sinocyclocheilus grahami])	gi|209572631|sp|A5JV83.2|HSPBB_DANRE(RecName: Full=Heat shock protein beta-11)
TRINITY_DN45765_c1_g1	-2.00587	4.23e-11	4.32e-10	yes	down	7.38	2.89	None	None
TRINITY_DN28828_c1_g3	-3.4653	4.24e-11	4.33e-10	yes	down	17.86	4.43	None	None
TRINITY_DN30761_c0_g1	-3.4653	4.24e-11	4.33e-10	yes	down	7.21	0.57	None	None
TRINITY_DN44930_c0_g1	1.34848	4.3e-11	4.39e-10	yes	up	3.97	12.77	XP_012673793.1(PREDICTED: protein NLRC3-like, partial [Clupea harengus])	None
TRINITY_DN46727_c5_g3	1.39023	4.36e-11	4.44e-10	yes	up	37.6	26.15	XP_019904503.1(PREDICTED: uncharacterized protein LOC105009293 [Esox lucius])	None
TRINITY_DN28685_c1_g1	-1.07807	4.37e-11	4.45e-10	yes	down	6.41	3.17	XP_018922300.1(PREDICTED: guanine nucleotide-binding protein G(q) subunit alpha [Cyprinus carpio])	gi|251757278|sp|Q28294.2|GNAQ_CANFA(RecName: Full=Guanine nucleotide-binding protein G(q) subunit alpha; AltName: Full=Guanine nucleotide-binding protein alpha-q >gi|251757467|sp|Q2PKF4.3|GNAQ_PIG RecName: Full=Guanine nucleotide-binding protein G(q) subunit alpha; AltName: Full=Guanine nucleotide-binding protein alpha-q >gi|251757492|sp|P50148.4|GNAQ_HUMAN RecName: Full=Guanine nucleotide-bindin…
TRINITY_DN48189_c1_g1	2.49312	4.46e-11	4.54e-10	yes	up	0.6	5.19	None	None
TRINITY_DN41094_c1_g1	-1.09725	4.51e-11	4.59e-10	yes	down	1.97	0.74	XP_016392820.1(PREDICTED: uncharacterized protein LOC107727458 [Sinocyclocheilus rhinocerous])	gi|141475|sp|P14381.1|YTX2_XENLA(RecName: Full=Transposon TX1 uncharacterized 149 kDa protein; AltName: Full=ORF 2)
TRINITY_DN35191_c1_g2	-1.77777	4.52e-11	4.59e-10	yes	down	10.45	3.19	None	None
TRINITY_DN38527_c1_g1	-1.81894	4.58e-11	4.65e-10	yes	down	10.13	4.81	None	None
TRINITY_DN40800_c3_g2	-1.31382	4.59e-11	4.66e-10	yes	down	9.63	6.52	None	None
TRINITY_DN48585_c0_g1	-1.51583	4.7e-11	4.77e-10	yes	down	63.64	23.41	None	None
TRINITY_DN39911_c3_g1	1.44466	4.71e-11	4.78e-10	yes	up	3.34	9.89	XP_021164387.1(abl interactor 2-like isoform X3 [Fundulus heteroclitus])	None
TRINITY_DN20359_c0_g6	-5.4653	4.75e-11	4.81e-10	yes	down	4.16	0.1	None	None
TRINITY_DN24435_c5_g1	-5.4653	4.75e-11	4.81e-10	yes	down	1.11	0.03	KTF80457.1(hypothetical protein cypCar_00030406 [Cyprinus carpio])	gi|300680985|sp|A1A600.2|EFC4A_DANRE(RecName: Full=EF-hand calcium-binding domain-containing protein 4A; AltName: Full=Calcium release-activated channel regulator 2B)
TRINITY_DN34322_c3_g1	1.27448	4.81e-11	4.87e-10	yes	up	4.39	9.67	NP_001122216.2(cytochrome b561 [Danio rerio])	gi|2498197|sp|Q95245.1|CY561_PIG(RecName: Full=Cytochrome b561; AltName: Full=Cytochrome b-561)
TRINITY_DN47497_c3_g1	-1.00703	4.82e-11	4.88e-10	yes	down	6.77	4.6	XP_016411993.1(PREDICTED: protein transport protein Sec24C-like isoform X2 [Sinocyclocheilus rhinocerous])	gi|215273909|sp|O94855.2|SC24D_HUMAN(RecName: Full=Protein transport protein Sec24D; AltName: Full=SEC24-related protein D)
TRINITY_DN20158_c2_g1	-1.74758	4.82e-11	4.88e-10	yes	down	22.9	5.58	None	None
TRINITY_DN31025_c1_g2	-3.265	4.87e-11	4.92e-10	yes	down	5.41	4.44	None	None
TRINITY_DN47871_c3_g3	-1.15787	4.9e-11	4.95e-10	yes	down	12.69	4.64	None	None
TRINITY_DN40926_c0_g1	-1.30509	4.97e-11	5.02e-10	yes	down	2.94	0.94	XP_016355251.1(PREDICTED: cGMP-specific 3',5'-cyclic phosphodiesterase-like isoform X2 [Sinocyclocheilus anshuiensis])	gi|3182960|sp|Q28156.1|PDE5A_BOVIN(RecName: Full=cGMP-specific 3',5'-cyclic phosphodiesterase; AltName: Full=cGMP-binding cGMP-specific phosphodiesterase; Short=CGB-PDE)
TRINITY_DN31127_c1_g3	3.24068	4.97e-11	5.02e-10	yes	up	7.03	66.5	None	None
TRINITY_DN26259_c1_g1	-1.04602	4.98e-11	5.03e-10	yes	down	51.17	31.75	None	None
TRINITY_DN36454_c1_g4	-2.66883	5.28e-11	5.33e-10	yes	down	20.51	1.65	None	None
TRINITY_DN39726_c0_g1	1.61974	5.3e-11	5.35e-10	yes	up	0.46	1.29	XP_021336988.1(paraneoplastic antigen Ma1 homolog [Danio rerio])	gi|160419157|sp|A6QLK5.1|PNMA1_BOVIN(RecName: Full=Paraneoplastic antigen Ma1 homolog)
TRINITY_DN29810_c2_g1	-3.10273	5.32e-11	5.37e-10	yes	down	4.49	0.77	KTG42894.1(hypothetical protein cypCar_00016987 [Cyprinus carpio])	None
TRINITY_DN19197_c0_g2	6.16406	5.37e-11	5.42e-10	yes	up	0	1.2	XP_022541254.1(G2/M phase-specific E3 ubiquitin-protein ligase-like [Astyanax mexicanus])	gi|74738611|sp|Q7L622.1|G2E3_HUMAN(RecName: Full=G2/M phase-specific E3 ubiquitin-protein ligase)
TRINITY_DN24815_c2_g1	2.66398	5.43e-11	5.47e-10	yes	up	1.27	6.5	NP_001104623.2(SLAM family member [Danio rerio])	None
TRINITY_DN25135_c2_g2	2.66398	5.43e-11	5.47e-10	yes	up	1.6	12.37	None	None
TRINITY_DN35822_c0_g4	-3.10155	5.46e-11	5.49e-10	yes	down	7.29	0.74	None	None
TRINITY_DN25107_c2_g1	2.89727	5.75e-11	5.78e-10	yes	up	0.32	2.46	XP_017562585.1(PREDICTED: four and a half LIM domains protein 1 isoform X2 [Pygocentrus nattereri])	gi|81907626|sp|Q9WUH4.1|FHL1_RAT(RecName: Full=Four and a half LIM domains protein 1; Short=FHL-1)
TRINITY_DN25124_c2_g1	-1.24587	5.85e-11	5.88e-10	yes	down	52.53	24.79	CDQ73166.1(unnamed protein product [Oncorhynchus mykiss])	None
TRINITY_DN22173_c0_g2	-2.15753	5.86e-11	5.89e-10	yes	down	35.47	7.43	None	None
TRINITY_DN21963_c2_g1	-1.71046	5.87e-11	5.9e-10	yes	down	62.89	25.22	None	None
TRINITY_DN42476_c1_g2	1.56522	5.93e-11	5.95e-10	yes	up	2.87	7.25	XP_016430427.1(PREDICTED: glypican-5-like [Sinocyclocheilus rhinocerous])	None
TRINITY_DN35086_c0_g3	-6.4653	5.98e-11	6e-10	yes	down	6.65	0	XP_018969690.1(PREDICTED: equilibrative nucleoside transporter 1-like [Cyprinus carpio])	gi|9296969|sp|O54698.3|S29A1_RAT(RecName: Full=Equilibrative nucleoside transporter 1; AltName: Full=Equilibrative nitrobenzylmercaptopurine riboside-sensitive nucleoside transporter; Short=Equilibrative NBMPR-sensitive nucleoside transporter; AltName: Full=Nucleoside transporter, es-type; AltName: Full=Solute carrier family 29 member 1)
TRINITY_DN19685_c0_g1	-6.4653	5.98e-11	6e-10	yes	down	0.98	0	XP_016374006.1(PREDICTED: thrombospondin-type laminin G domain and EAR repeat-containing protein-like isoform X2 [Sinocyclocheilus rhinocerous])	gi|442580977|sp|J3S6Y1.1|TSEAR_MOUSE(RecName: Full=Thrombospondin-type laminin G domain and EAR repeat-containing protein; Short=TSP-EAR; Flags: Precursor)
TRINITY_DN23443_c2_g6	-6.4653	5.98e-11	6e-10	yes	down	5.71	0	KTF82544.1(hypothetical protein cypCar_00033035 [Cyprinus carpio])	None
TRINITY_DN28848_c1_g3	-6.4653	5.98e-11	6e-10	yes	down	1.87	0	XP_018955121.1(PREDICTED: uncharacterized protein LOC109084930, partial [Cyprinus carpio])	gi|74705367|sp|O00370.1|LORF2_HUMAN(RecName: Full=LINE-1 retrotransposable element ORF2 protein; Short=ORF2p; Includes: RecName: Full=Reverse transcriptase; Includes: RecName: Full=Endonuclease)
TRINITY_DN38994_c0_g3	-2.1972	6e-11	6.01e-10	yes	down	1.04	0.24	XP_018974953.1(PREDICTED: uncharacterized protein LOC109106091 [Cyprinus carpio])	gi|130407|sp|P10394.1|POL4_DROME(RecName: Full=Retrovirus-related Pol polyprotein from transposon 412; Includes: RecName: Full=Protease; Includes: RecName: Full=Reverse transcriptase; Includes: RecName: Full=Endonuclease)
TRINITY_DN39958_c1_g3	1.05826	6.06e-11	6.07e-10	yes	up	6.24	14.62	AEH76920.1(glucose phosphate isomerase b [Hypophthalmichthys molitrix])	gi|378405257|sp|Q3ZBD7.4|G6PI_BOVIN(RecName: Full=Glucose-6-phosphate isomerase; Short=GPI; AltName: Full=Autocrine motility factor; Short=AMF; AltName: Full=Neuroleukin; Short=NLK; AltName: Full=Phosphoglucose isomerase; Short=PGI; AltName: Full=Phosphohexose isomerase; Short=PHI)
TRINITY_DN23634_c0_g1	-1.25407	6.16e-11	6.16e-10	yes	down	36.95	20.74	None	None
TRINITY_DN23621_c1_g1	-1.55622	6.19e-11	6.19e-10	yes	down	26.37	10.27	None	None
TRINITY_DN28220_c0_g1	1.69294	6.26e-11	6.26e-10	yes	up	4.52	14.24	None	None
TRINITY_DN47996_c4_g1	1.50272	6.34e-11	6.34e-10	yes	up	1.97	5.55	XP_016353780.1(PREDICTED: dimethylaniline monooxygenase [N-oxide-forming] 5-like [Sinocyclocheilus anshuiensis])	gi|544327|sp|Q04799.2|FMO5_RABIT(RecName: Full=Dimethylaniline monooxygenase [N-oxide-forming] 5; AltName: Full=Dimethylaniline oxidase 5; AltName: Full=FMO 1C1; AltName: Full=FMO form 3; AltName: Full=Hepatic flavin-containing monooxygenase 5; Short=FMO 5)
TRINITY_DN39344_c1_g1	-2.38849	6.43e-11	6.42e-10	yes	down	13.5	1.59	None	None
TRINITY_DN41339_c0_g1	2.12067	6.54e-11	6.52e-10	yes	up	0.18	1.9	XP_016086504.1(PREDICTED: carcinoembryonic antigen-related cell adhesion molecule 5-like isoform X1 [Sinocyclocheilus grahami])	gi|317373456|sp|P06731.3|CEAM5_HUMAN(RecName: Full=Carcinoembryonic antigen-related cell adhesion molecule 5; AltName: Full=Carcinoembryonic antigen; Short=CEA; AltName: Full=Meconium antigen 100; AltName: CD_antigen=CD66e; Flags: Precursor)
TRINITY_DN22207_c2_g1	-1.89894	7.05e-11	7.03e-10	yes	down	30.27	12.76	None	None
TRINITY_DN48835_c9_g2	1.89193	7.26e-11	7.23e-10	yes	up	25.98	80.15	None	None
TRINITY_DN32692_c1_g2	3.45844	7.31e-11	7.27e-10	yes	up	1.02	9.18	XP_016304125.1(PREDICTED: LOW QUALITY PROTEIN: protein NLRC5-like [Sinocyclocheilus anshuiensis])	gi|34223733|sp|P59046.2|NAL12_HUMAN(RecName: Full=NACHT, LRR and PYD domains-containing protein 12; AltName: Full=Monarch-1; AltName: Full=PYRIN-containing APAF1-like protein 7; AltName: Full=Regulated by nitric oxide)
TRINITY_DN26991_c1_g1	-1.7625	7.41e-11	7.36e-10	yes	down	15.53	5.79	None	None
TRINITY_DN47789_c1_g1	-1.7625	7.41e-11	7.36e-10	yes	down	2.59	1.57	XP_018964015.1(PREDICTED: uncharacterized protein LOC109094764 [Cyprinus carpio])	gi|82281205|sp|O93209.1|POL_FFV(RecName: Full=Pro-Pol polyprotein; AltName: Full=Pr125Pol; Contains: RecName: Full=Protease/Reverse transcriptase/ribonuclease H; AltName: Full=p87Pro-RT-RNaseH; Contains: RecName: Full=Protease/Reverse transcriptase; AltName: Full=p65Pro-RT; Contains: RecName: Full=Ribonuclease H; Short=RNase H; Contains: RecName: Full=Integrase; Short=IN; AltName: Full=p42In)
TRINITY_DN24851_c2_g1	1.86113	7.48e-11	7.43e-10	yes	up	1.08	3.86	XP_017210965.1(uncharacterized protein LOC103910566 isoform X1 [Danio rerio])	None
TRINITY_DN23546_c3_g3	-3.12488	7.54e-11	7.48e-10	yes	down	26.47	2.28	None	None
TRINITY_DN47229_c0_g3	-1.80317	7.55e-11	7.49e-10	yes	down	6.14	1.88	None	None
TRINITY_DN34498_c0_g1	1.07141	7.86e-11	7.79e-10	yes	up	3.76	7.03	KTG06838.1(hypothetical protein cypCar_00019822 [Cyprinus carpio])	gi|122144664|sp|Q17QU7.1|DHR13_BOVIN(RecName: Full=Dehydrogenase/reductase SDR family member 13; AltName: Full=Short chain dehydrogenase/reductase family 7C member 5; Flags: Precursor)
TRINITY_DN49051_c4_g4	-3.43386	8.04e-11	7.95e-10	yes	down	8.02	0.78	XP_018952128.1(PREDICTED: uncharacterized protein LOC109081593 isoform X1 [Cyprinus carpio])	None
TRINITY_DN42580_c4_g2	2.16028	8.1e-11	8.02e-10	yes	up	8.69	8.06	None	None
TRINITY_DN21420_c0_g1	-2.50183	8.18e-11	8.08e-10	yes	down	16.69	2.62	None	None
TRINITY_DN24384_c0_g1	-2.50183	8.18e-11	8.08e-10	yes	down	0.57	0.11	XP_017316451.1(PREDICTED: ATP-binding cassette sub-family A member 1-like [Ictalurus punctatus])	gi|308153644|sp|O95477.3|ABCA1_HUMAN(RecName: Full=ATP-binding cassette sub-family A member 1; AltName: Full=ATP-binding cassette transporter 1; Short=ABC-1; Short=ATP-binding cassette 1; AltName: Full=Cholesterol efflux regulatory protein)
TRINITY_DN42076_c0_g2	-2.50183	8.18e-11	8.08e-10	yes	down	21.38	4.07	None	None
TRINITY_DN20953_c1_g1	-3.43288	8.2e-11	8.08e-10	yes	down	3.07	0.46	None	None
TRINITY_DN35663_c1_g3	-3.43288	8.2e-11	8.08e-10	yes	down	1.99	0.19	NP_001103187.1(choline/ethanolaminephosphotransferase 1 [Danio rerio])	gi|82209827|sp|Q7ZYQ3.1|CEPT1_XENLA(RecName: Full=Choline/ethanolaminephosphotransferase 1 [Xenopus laevis])
TRINITY_DN35737_c0_g6	-3.43288	8.2e-11	8.08e-10	yes	down	5.95	0.58	None	None
TRINITY_DN42309_c0_g1	-3.43288	8.2e-11	8.08e-10	yes	down	4.56	1.38	XP_016106501.1(PREDICTED: centrosomal protein of 72 kDa-like isoform X1 [Sinocyclocheilus grahami])	gi|257096316|sp|Q501X2.2|CEP72_DANRE(RecName: Full=Centrosomal protein of 72 kDa; Short=Cep72)
TRINITY_DN42565_c1_g3	-3.43288	8.2e-11	8.08e-10	yes	down	3.55	0.63	XP_022055309.1(zinc finger BED domain-containing protein 1-like [Acanthochromis polyacanthus])	None
TRINITY_DN40607_c0_g4	-1.48975	8.41e-11	8.29e-10	yes	down	35.2	13.08	None	None
TRINITY_DN37931_c0_g2	-2.274	8.48e-11	8.35e-10	yes	down	12	3.75	XP_016095272.1(PREDICTED: pentraxin fusion protein-like [Sinocyclocheilus grahami])	gi|1346926|sp|P49263.1|PXN1_XENLA(RecName: Full=Pentraxin fusion protein; Flags: Precursor)
TRINITY_DN24854_c0_g1	2.32611	8.51e-11	8.37e-10	yes	up	2.49	9.23	XP_016110058.1(PREDICTED: C-C motif chemokine 28-like isoform X1 [Sinocyclocheilus grahami])	gi|27151761|sp|Q9Z1X0.2|CCL27_MOUSE(RecName: Full=C-C motif chemokine 27; AltName: Full=CC chemokine ILC; AltName: Full=Cutaneous T-cell-attracting chemokine; Short=CTACK; AltName: Full=ESkine; AltName: Full=IL-11 R-alpha-locus chemokine; Short=ALP; Short=mILC; AltName: Full=Skinkine; AltName: Full=Small-inducible cytokine A27; Flags: Precursor)
TRINITY_DN44530_c1_g1	1.1424	8.56e-11	8.42e-10	yes	up	11.39	26.32	None	None
TRINITY_DN41684_c0_g2	1.70462	8.66e-11	8.52e-10	yes	up	7.65	26.06	None	None
TRINITY_DN30784_c1_g1	2.16937	8.75e-11	8.59e-10	yes	up	4.14	14.07	None	None
TRINITY_DN42771_c0_g4	1.25211	8.79e-11	8.62e-10	yes	up	4.38	14.66	None	None
TRINITY_DN37142_c1_g2	2.10901	9.06e-11	8.88e-10	yes	up	11.97	35.36	None	None
TRINITY_DN43437_c0_g1	3.02655	9.27e-11	9.08e-10	yes	up	1.87	15.88	None	None
TRINITY_DN21480_c1_g2	1.7986	9.28e-11	9.09e-10	yes	up	15.93	47.02	None	None
TRINITY_DN39662_c2_g1	-1.73595	9.3e-11	9.1e-10	yes	down	22.97	7.88	None	None
TRINITY_DN33821_c0_g2	-3.23398	9.32e-11	9.12e-10	yes	down	6.59	0.08	XP_022067413.1(uncharacterized protein LOC110963363 isoform X2 [Acanthochromis polyacanthus])	None
TRINITY_DN28362_c1_g1	1.47803	9.4e-11	9.19e-10	yes	up	1.27	2.76	XP_009300605.1(uncharacterized protein LOC103911210 [Danio rerio])	gi|126253809|sp|Q924X7.2|STK33_MOUSE(RecName: Full=Serine/threonine-protein kinase 33)
TRINITY_DN48971_c6_g1	-1.38557	9.41e-11	9.19e-10	yes	down	0.81	0.32	XP_016342798.1(PREDICTED: myopalladin-like isoform X2 [Sinocyclocheilus anshuiensis])	gi|109892761|sp|Q86TC9.2|MYPN_HUMAN(RecName: Full=Myopalladin; AltName: Full=145 kDa sarcomeric protein)
TRINITY_DN47679_c2_g1	-1.05193	9.46e-11	9.24e-10	yes	down	31.68	11.87	XP_016365163.1(PREDICTED: E3 ubiquitin-protein ligase TRIM39-like isoform X1 [Sinocyclocheilus rhinocerous])	gi|56404980|sp|Q9UPQ4.2|TRI35_HUMAN(RecName: Full=Tripartite motif-containing protein 35; AltName: Full=Hemopoietic lineage switch protein 5)
TRINITY_DN45356_c2_g1	-1.79472	9.52e-11	9.3e-10	yes	down	48.12	17.18	None	None
TRINITY_DN46365_c2_g1	-1.3264	9.57e-11	9.34e-10	yes	down	13.66	8.22	None	None
TRINITY_DN21063_c0_g1	3.76352	9.65e-11	9.41e-10	yes	up	0.07	1.62	XP_016355147.1(PREDICTED: uncharacterized protein LOC107698608 [Sinocyclocheilus anshuiensis])	None
TRINITY_DN22250_c3_g1	-6.43124	9.71e-11	9.47e-10	yes	down	8.04	0	None	None
TRINITY_DN48728_c5_g3	-1.41249	9.74e-11	9.49e-10	yes	down	10.56	6.27	XP_002663014.2(macrophage mannose receptor 1 [Danio rerio])	gi|126730|sp|P22897.1|MRC1_HUMAN(RecName: Full=Macrophage mannose receptor 1; Short=MMR; AltName: Full=C-type lectin domain family 13 member D; AltName: Full=C-type lectin domain family 13 member D-like; AltName: Full=Human mannose receptor; Short=hMR; AltName: Full=Macrophage mannose receptor 1-like protein 1; AltName: CD_antigen=CD206; Flags: Precursor)
TRINITY_DN21412_c0_g1	1.28184	1.01e-10	9.79e-10	yes	up	25.89	31.66	None	None
TRINITY_DN29624_c2_g1	1.98261	1.01e-10	9.79e-10	yes	up	19.77	31.69	None	None
TRINITY_DN45277_c0_g1	-1.07194	1.03e-10	1e-09	yes	down	5.59	2.05	XP_016408830.1(PREDICTED: centrosome-associated protein 350-like [Sinocyclocheilus rhinocerous])	gi|74746869|sp|Q5VT06.1|CE350_HUMAN(RecName: Full=Centrosome-associated protein 350; Short=Cep350; AltName: Full=Centrosome-associated protein of 350 kDa)
TRINITY_DN24524_c1_g1	-2.82589	1.05e-10	1.02e-09	yes	down	0.98	0.14	XP_023817614.1(uncharacterized protein LOC111948487 isoform X1 [Oryzias latipes])	None
TRINITY_DN30476_c1_g2	-2.82589	1.05e-10	1.02e-09	yes	down	20.85	2.24	XP_018949618.1(PREDICTED: proto-oncogene tyrosine-protein kinase ROS [Cyprinus carpio])	gi|74959305|sp|O45539.2|SRC2_CAEEL(RecName: Full=Tyrosine protein-kinase src-2; AltName: Full=SRC oncogene related protein 2)
TRINITY_DN36048_c0_g1	-2.82589	1.05e-10	1.02e-09	yes	down	1.01	0.15	XP_016308279.1(PREDICTED: ERI1 exoribonuclease 2 [Sinocyclocheilus anshuiensis])	gi|82228769|sp|Q502M8.1|ERI2_DANRE(RecName: Full=ERI1 exoribonuclease 2; AltName: Full=Exonuclease domain-containing protein 1)
TRINITY_DN42280_c3_g1	-3.99582	1.06e-10	1.03e-09	yes	down	1.89	0.12	XP_018977587.1(PREDICTED: uncharacterized protein LOC109108929 [Cyprinus carpio])	gi|75327676|sp|Q7Y180.1|AN322_ORYSJ(RecName: Full=Acidic leucine-rich nuclear phosphoprotein 32-related protein 2; AltName: Full=ANP32/acidic nuclear phosphoprotein-like protein 2)
TRINITY_DN25827_c1_g1	-6.42466	1.07e-10	1.03e-09	yes	down	1.58	0	XP_016372764.1(PREDICTED: spermatogenesis-associated protein 22-like [Sinocyclocheilus rhinocerous])	gi|75048371|sp|Q95JQ1.1|SPT22_MACFA(RecName: Full=Spermatogenesis-associated protein 22)
TRINITY_DN36327_c0_g1	-6.42466	1.07e-10	1.03e-09	yes	down	17.06	0	None	None
TRINITY_DN20655_c1_g1	5.13089	1.07e-10	1.04e-09	yes	up	0.27	9.61	XP_016110514.1(PREDICTED: ribonuclease inhibitor-like [Sinocyclocheilus grahami])	gi|132574|sp|P10775.1|RINI_PIG(RecName: Full=Ribonuclease inhibitor; AltName: Full=Ribonuclease/angiogenin inhibitor 1)
TRINITY_DN29831_c1_g2	-3.06127	1.08e-10	1.05e-09	yes	down	1.56	0.2	None	None
TRINITY_DN48578_c2_g3	-1.20896	1.09e-10	1.05e-09	yes	down	22.59	9.98	None	None
TRINITY_DN45134_c0_g1	-1.67681	1.09e-10	1.06e-09	yes	down	6.28	1.04	XP_018928124.1(PREDICTED: cGMP-dependent protein kinase 1-like isoform X1 [Cyprinus carpio])	gi|166220481|sp|P0C605.1|KGP1_MOUSE(RecName: Full=cGMP-dependent protein kinase 1; Short=cGK 1; Short=cGK1; AltName: Full=cGMP-dependent protein kinase I; Short=cGKI)
TRINITY_DN46858_c2_g1	-2.36577	1.15e-10	1.11e-09	yes	down	1.44	0.29	None	None
TRINITY_DN27126_c2_g1	2.45465	1.17e-10	1.13e-09	yes	up	3.37	13.79	None	None
TRINITY_DN22340_c0_g1	3.43254	1.22e-10	1.18e-09	yes	up	0.09	0.98	XP_018945883.1(PREDICTED: keratin, type I cytoskeletal 19-like [Cyprinus carpio])	gi|81891673|sp|Q6IFU7.1|K1C42_RAT(RecName: Full=Keratin, type I cytoskeletal 42; AltName: Full=Cytokeratin-42; Short=CK-42; AltName: Full=Keratin-42; Short=K42; AltName: Full=Type I keratin Ka22)
TRINITY_DN31897_c1_g2	-1.62432	1.24e-10	1.19e-09	yes	down	26.82	17.73	None	None
TRINITY_DN18126_c0_g1	2.88272	1.27e-10	1.22e-09	yes	up	1.21	8.16	None	None
TRINITY_DN33317_c1_g1	1.36174	1.27e-10	1.22e-09	yes	up	0.77	2.08	XP_016409116.1(PREDICTED: transforming growth factor-beta-induced protein ig-h3 [Sinocyclocheilus rhinocerous])	gi|2498193|sp|Q15582.1|BGH3_HUMAN(RecName: Full=Transforming growth factor-beta-induced protein ig-h3; Short=Beta ig-h3; AltName: Full=Kerato-epithelin; AltName: Full=RGD-containing collagen-associated protein; Short=RGD-CAP; Flags: Precursor)
TRINITY_DN46031_c1_g2	-1.47758	1.31e-10	1.26e-09	yes	down	5.18	1.8	XP_018936910.1(PREDICTED: LOW QUALITY PROTEIN: lysine-specific demethylase 5A-like [Cyprinus carpio])	None
TRINITY_DN36765_c0_g5	1.3827	1.31e-10	1.26e-09	yes	up	8.16	22.27	None	None
TRINITY_DN24813_c0_g1	-1.65383	1.34e-10	1.29e-09	yes	down	5.98	3.05	XP_016341263.1(PREDICTED: RNA-directed DNA polymerase from mobile element jockey-like [Sinocyclocheilus anshuiensis])	gi|134083|sp|P21328.1|RTJK_DROME(RecName: Full=RNA-directed DNA polymerase from mobile element jockey; AltName: Full=Reverse transcriptase)
TRINITY_DN37292_c1_g1	6.09694	1.42e-10	1.36e-09	yes	up	0	3.03	None	None
TRINITY_DN33275_c2_g1	3.19005	1.43e-10	1.37e-09	yes	up	0.14	3.82	KTF85862.1(hypothetical protein cypCar_00018920 [Cyprinus carpio])	gi|81175037|sp|Q5PQN5.1|TRI55_RAT(RecName: Full=Tripartite motif-containing protein 55; AltName: Full=Muscle-specific RING finger protein 2; Short=MuRF-2; Short=MuRF2; AltName: Full=RING finger protein 29)
TRINITY_DN21012_c2_g1	-1.73695	1.46e-10	1.4e-09	yes	down	112.77	55.81	None	None
TRINITY_DN45701_c1_g2	2.62216	1.46e-10	1.4e-09	yes	up	0.19	3.46	XP_016359954.1(PREDICTED: sushi domain-containing protein 2-like [Sinocyclocheilus anshuiensis])	gi|81881775|sp|Q9DBX3.1|SUSD2_MOUSE(RecName: Full=Sushi domain-containing protein 2; Flags: Precursor)
TRINITY_DN32363_c1_g1	-1.35618	1.48e-10	1.42e-09	yes	down	25.43	9.96	None	None
TRINITY_DN33293_c0_g2	-1.51807	1.48e-10	1.42e-09	yes	down	10.2	4.74	XP_016379523.1(PREDICTED: single-pass membrane and coiled-coil domain-containing protein 3-like [Sinocyclocheilus rhinocerous])	gi|81897091|sp|Q8BQM7.1|SMCO3_MOUSE(RecName: Full=Single-pass membrane and coiled-coil domain-containing protein 3)
TRINITY_DN35384_c1_g1	-2.47758	1.48e-10	1.42e-09	yes	down	2.37	1.26	XP_018967069.1(PREDICTED: ICOS ligand-like isoform X1 [Cyprinus carpio])	gi|82234804|sp|Q68EV1.1|CD276_XENLA(RecName: Full=CD276 antigen homolog; AltName: CD_antigen=CD276; Flags: Precursor)
TRINITY_DN25351_c0_g1	1.62601	1.52e-10	1.45e-09	yes	up	8.49	21.72	None	None
TRINITY_DN28803_c0_g1	-1.33844	1.53e-10	1.47e-09	yes	down	1.97	1.81	XP_009293773.1(uncharacterized protein LOC101883290 isoform X2 [Danio rerio])	None
TRINITY_DN23394_c0_g1	-1.75878	1.57e-10	1.5e-09	yes	down	4.39	1.37	None	None
TRINITY_DN27518_c0_g1	-1.75878	1.57e-10	1.5e-09	yes	down	3.28	1.02	XP_009303545.1(large neutral amino acids transporter small subunit 4 isoform X1 [Danio rerio])	gi|122142425|sp|Q0VCM6.1|LAT4_BOVIN(RecName: Full=Large neutral amino acids transporter small subunit 4; AltName: Full=L-type amino acid transporter 4; AltName: Full=Solute carrier family 43 member 2)
TRINITY_DN38422_c2_g1	-3.39971	1.58e-10	1.51e-09	yes	down	6.87	0.68	None	None
TRINITY_DN35170_c1_g1	1.60585	1.59e-10	1.51e-09	yes	up	4.93	14.46	XP_018968772.1(PREDICTED: uncharacterized protein LOC109099697 [Cyprinus carpio])	None
TRINITY_DN39605_c0_g1	-1.36249	1.62e-10	1.54e-09	yes	down	18.7	8.29	None	None
TRINITY_DN19347_c0_g1	-3.36284	1.62e-10	1.55e-09	yes	down	6.72	0.7	XP_018966262.1(PREDICTED: LOW QUALITY PROTEIN: fructose-bisphosphate aldolase A-like [Cyprinus carpio])	gi|576011087|sp|B5DGM7.1|ALDOA_SALSA(RecName: Full=Fructose-bisphosphate aldolase A; AltName: Full=Muscle-type aldolase; AltName: Allergen=Sal s 3.0101)
TRINITY_DN21285_c1_g1	-3.97194	1.63e-10	1.55e-09	yes	down	12.4	1.2	None	None
TRINITY_DN32577_c0_g1	-1.03234	1.63e-10	1.55e-09	yes	down	5.58	2.72	ADO52204.1(interferon regulatory factor 3 [Carassius auratus])	gi|2497443|sp|P70671.1|IRF3_MOUSE(RecName: Full=Interferon regulatory factor 3; Short=IRF-3)
TRINITY_DN22946_c2_g2	-4.4653	1.64e-10	1.56e-09	yes	down	12.1	1.16	None	None
TRINITY_DN19314_c1_g4	-5.38454	1.64e-10	1.57e-09	yes	down	2.83	0.07	XP_016366133.1(PREDICTED: trichohyalin-like [Sinocyclocheilus rhinocerous])	None
TRINITY_DN47728_c1_g1	-1.71266	1.66e-10	1.58e-09	yes	down	32.65	10.51	None	None
TRINITY_DN19906_c1_g1	1.97802	1.67e-10	1.59e-09	yes	up	2.16	8.53	None	None
TRINITY_DN31931_c0_g2	-5.38284	1.69e-10	1.6e-09	yes	down	0.7	0.02	XP_015259136.1(PREDICTED: G2/M phase-specific E3 ubiquitin-protein ligase-like isoform X1 [Cyprinodon variegatus])	gi|82075465|sp|Q5F4A1.1|G2E3_CHICK(RecName: Full=G2/M phase-specific E3 ubiquitin-protein ligase)
TRINITY_DN20341_c0_g2	-1.69531	1.88e-10	1.78e-09	yes	down	7.48	2.22	XP_016138015.1(PREDICTED: sterile alpha motif domain-containing protein 12-like isoform X1 [Sinocyclocheilus grahami])	gi|123795995|sp|Q0VE29.1|SAM12_MOUSE(RecName: Full=Sterile alpha motif domain-containing protein 12; Short=SAM domain-containing protein 12)
TRINITY_DN48592_c4_g3	-6.38284	1.9e-10	1.8e-09	yes	down	4.13	0	None	None
TRINITY_DN26342_c5_g2	-6.38284	1.9e-10	1.8e-09	yes	down	0.73	0	CDQ76752.1(unnamed protein product [Oncorhynchus mykiss])	None
TRINITY_DN26032_c0_g2	-6.38284	1.9e-10	1.8e-09	yes	down	4.14	0	None	None
TRINITY_DN18277_c0_g3	-6.38284	1.9e-10	1.8e-09	yes	down	0.81	0	XP_019207463.1(PREDICTED: uncharacterized protein LOC106097627 [Oreochromis niloticus])	gi|130407|sp|P10394.1|POL4_DROME(RecName: Full=Retrovirus-related Pol polyprotein from transposon 412; Includes: RecName: Full=Protease; Includes: RecName: Full=Reverse transcriptase; Includes: RecName: Full=Endonuclease)
TRINITY_DN42520_c1_g1	-1.37587	1.92e-10	1.81e-09	yes	down	26.7	3.93	None	None
TRINITY_DN26505_c3_g1	-3.04261	1.92e-10	1.81e-09	yes	down	2.61	0.53	XP_016297896.1(PREDICTED: pleckstrin-2-like [Sinocyclocheilus anshuiensis])	gi|20532216|sp|Q9NYT0.1|PLEK2_HUMAN(RecName: Full=Pleckstrin-2)
TRINITY_DN30627_c2_g2	-1.29243	1.92e-10	1.81e-09	yes	down	49.53	9.9	None	None
TRINITY_DN47714_c4_g1	1.95997	1.93e-10	1.82e-09	yes	up	1.15	5.3	None	None
TRINITY_DN48018_c0_g1	-1.61082	1.94e-10	1.83e-09	yes	down	13.42	5.42	None	None
TRINITY_DN30697_c0_g1	1.10259	1.96e-10	1.85e-09	yes	up	10.96	10.64	KTF75817.1(hypothetical protein cypCar_00029744 [Cyprinus carpio])	None
TRINITY_DN20407_c3_g1	1.13089	1.96e-10	1.85e-09	yes	up	9.13	25.47	None	None
TRINITY_DN48014_c1_g5	2.84096	2.01e-10	1.89e-09	yes	up	0.44	3.57	XP_022529087.1(myosin-7-like [Astyanax mexicanus])	gi|317373582|sp|P13533.5|MYH6_HUMAN(RecName: Full=Myosin-6; AltName: Full=Myosin heavy chain 6; AltName: Full=Myosin heavy chain, cardiac muscle alpha isoform; Short=MyHC-alpha)
TRINITY_DN33187_c1_g3	1.88905	2.05e-10	1.93e-09	yes	up	0.18	0.7	XP_016135544.1(PREDICTED: MAM and LDL-receptor class A domain-containing protein 1-like [Sinocyclocheilus grahami])	gi|1042782324|sp|Q5VYJ5.4|MALR1_HUMAN(RecName: Full=MAM and LDL-receptor class A domain-containing protein 1; Flags: Precursor)
TRINITY_DN30653_c0_g2	1.88905	2.05e-10	1.93e-09	yes	up	1.19	5.36	XP_016419783.1(PREDICTED: uncharacterized protein LOC107749199 [Sinocyclocheilus rhinocerous])	gi|123796288|sp|Q2LKW6.1|NL1B1_MOUSE(RecName: Full=NACHT, LRR and PYD domains-containing protein 1b allele 1)
TRINITY_DN46269_c1_g3	1.65648	2.07e-10	1.94e-09	yes	up	6.23	20.54	None	None
TRINITY_DN44582_c2_g1	-1.79116	2.1e-10	1.97e-09	yes	down	14.79	5.74	None	None
TRINITY_DN19613_c1_g2	-1.20351	2.12e-10	1.99e-09	yes	down	72.17	23.78	XP_019119374.1(PREDICTED: uncharacterized protein LOC104930024 [Larimichthys crocea])	None
TRINITY_DN40582_c2_g3	4.19648	2.13e-10	2e-09	yes	up	0.33	6.06	None	None
TRINITY_DN22041_c0_g3	2.98898	2.14e-10	2.01e-09	yes	up	9.65	80.97	None	None
TRINITY_DN39549_c2_g1	-1.63933	2.15e-10	2.02e-09	yes	down	21.5	13.21	None	None
TRINITY_DN20620_c1_g2	2.51198	2.16e-10	2.03e-09	yes	up	0.27	1.6	XP_016378849.1(PREDICTED: four and a half LIM domains protein 2 [Sinocyclocheilus rhinocerous])	gi|116241364|sp|Q14192.3|FHL2_HUMAN(RecName: Full=Four and a half LIM domains protein 2; Short=FHL-2; AltName: Full=LIM domain protein DRAL; AltName: Full=Skeletal muscle LIM-protein 3; Short=SLIM-3)
TRINITY_DN24865_c0_g1	2.51198	2.16e-10	2.03e-09	yes	up	0.34	1.49	XP_019212204.1(PREDICTED: uncharacterized protein LOC106097739 [Oreochromis niloticus])	gi|341942132|sp|Q8C4H2.3|SAMD3_MOUSE(RecName: Full=Sterile alpha motif domain-containing protein 3; Short=SAM domain-containing protein 3)
TRINITY_DN29315_c0_g1	-3.49166	2.19e-10	2.05e-09	yes	down	2.97	0.28	None	None
TRINITY_DN45437_c0_g2	-1.07082	2.28e-10	2.13e-09	yes	down	3.37	1.68	AFC36882.1(estrogen receptor beta 1 [Paramisgurnus dabryanus])	gi|13124212|sp|Q9IAL9.1|ESR22_CARAU(RecName: Full=Estrogen receptor beta-2; Short=ER-beta-2; AltName: Full=Nuclear receptor subfamily 3 group A member 2-B)
TRINITY_DN21540_c2_g3	5.08105	2.31e-10	2.16e-09	yes	up	0.82	28.22	None	None
TRINITY_DN33778_c0_g1	-1.41876	2.32e-10	2.17e-09	yes	down	43.74	18.38	None	None
TRINITY_DN39820_c0_g1	-1.00093	2.33e-10	2.18e-09	yes	down	6.17	3.23	XP_018919760.1(PREDICTED: beta-1,4-galactosyltransferase 1-like isoform X2 [Cyprinus carpio])	gi|116241263|sp|P08037.3|B4GT1_BOVIN(RecName: Full=Beta-1,4-galactosyltransferase 1; Short=Beta-1,4-GalTase 1; Short=Beta4Gal-T1; Short=b4Gal-T1; AltName: Full=UDP-Gal:beta-GlcNAc beta-1,4-galactosyltransferase 1; AltName: Full=UDP-galactose:beta-N-acetylglucosamine beta-1,4-galactosyltransferase 1; Includes: RecName: Full=Lactose synthase A protein; Includes: RecName: Full=N-acetyllactosamine sy…
TRINITY_DN23078_c2_g1	-1.29538	2.4e-10	2.23e-09	yes	down	15.27	8.56	None	None
TRINITY_DN37587_c2_g1	1.57534	2.4e-10	2.23e-09	yes	up	0.2	0.69	XP_021332953.1(uncharacterized protein LOC110439877 [Danio rerio])	None
TRINITY_DN19576_c1_g1	2.60079	2.4e-10	2.23e-09	yes	up	0.36	2.28	XP_016103557.1(PREDICTED: serine/threonine-protein kinase/endoribonuclease ire-1-like isoform X1 [Sinocyclocheilus grahami])	gi|115502406|sp|Q09499.2|IRE1_CAEEL(RecName: Full=Serine/threonine-protein kinase/endoribonuclease ire-1; AltName: Full=Inositol-requiring protein 2; Includes: RecName: Full=Serine/threonine-protein kinase; Includes: RecName: Full=Endoribonuclease; Flags: Precursor)
TRINITY_DN36136_c0_g1	2.60079	2.4e-10	2.23e-09	yes	up	3.41	21.06	None	None
TRINITY_DN41329_c0_g1	2.60079	2.4e-10	2.23e-09	yes	up	0.1	0.58	XP_017211747.2(electrogenic sodium bicarbonate cotransporter 4 isoform X2 [Danio rerio])	gi|81864132|sp|Q6RI88.1|S4A5_RAT(RecName: Full=Electrogenic sodium bicarbonate cotransporter 4; AltName: Full=Solute carrier family 4 member 5)
TRINITY_DN48612_c1_g2	3.16406	2.42e-10	2.26e-09	yes	up	0.27	2.51	XP_018956543.1(PREDICTED: immunoglobulin superfamily member 1-like [Cyprinus carpio])	None
TRINITY_DN40570_c0_g2	-1.23879	2.43e-10	2.26e-09	yes	down	35.76	21.57	None	None
TRINITY_DN25234_c2_g1	1.33417	2.45e-10	2.27e-09	yes	up	9.72	30.97	None	None
TRINITY_DN29376_c0_g2	-6.36405	2.46e-10	2.28e-09	yes	down	8.61	0	XP_019222829.1(PREDICTED: LOW QUALITY PROTEIN: RNA-directed DNA polymerase from mobile element jockey-like [Oreochromis niloticus])	None
TRINITY_DN21064_c3_g2	2.70462	2.58e-10	2.39e-09	yes	up	0.64	4.47	XP_016142516.1(PREDICTED: proteoglycan 4-like [Sinocyclocheilus grahami])	None
TRINITY_DN21088_c0_g7	-3.6173	2.58e-10	2.39e-09	yes	down	1.3	0.1	XP_019133296.1(PREDICTED: uncharacterized protein LOC109142849 isoform X1 [Larimichthys crocea])	None
TRINITY_DN22288_c0_g1	1.8201	2.58e-10	2.39e-09	yes	up	3.78	9.1	None	None
TRINITY_DN28389_c1_g3	1.37532	2.62e-10	2.43e-09	yes	up	1.7	4.33	XP_016302073.1(PREDICTED: desmin-like isoform X1 [Sinocyclocheilus anshuiensis])	gi|729824|sp|Q04948.1|IFE_BRALA(RecName: Full=Non-neuronal cytoplasmic intermediate filament protein)
TRINITY_DN21891_c0_g1	-2.23028	2.63e-10	2.44e-09	yes	down	7.56	1.25	XP_016404038.1(PREDICTED: WD repeat-containing protein 17-like [Sinocyclocheilus rhinocerous])	None
TRINITY_DN23760_c0_g3	2.02655	2.65e-10	2.45e-09	yes	up	0.43	1.82	XP_016109998.1(PREDICTED: myozenin-1-like [Sinocyclocheilus grahami])	gi|75054189|sp|Q8SQ24.1|MYOZ1_BOVIN(RecName: Full=Myozenin-1; AltName: Full=Calsarcin-2)
TRINITY_DN31171_c0_g1	2.02655	2.65e-10	2.45e-09	yes	up	1.15	2.83	XP_018920568.1(PREDICTED: radial spoke head 10 homolog B-like isoform X1 [Cyprinus carpio])	gi|123911186|sp|Q08CH7.1|RS10B_DANRE(RecName: Full=Radial spoke head 10 homolog B)
TRINITY_DN46039_c0_g3	2.02655	2.65e-10	2.45e-09	yes	up	4.62	19.67	None	None
TRINITY_DN27869_c0_g1	-2.68604	2.68e-10	2.47e-09	yes	down	7.29	1.27	None	None
TRINITY_DN38288_c0_g3	1.16051	2.73e-10	2.52e-09	yes	up	24.11	56.2	XP_022046812.1(uncharacterized protein LOC110949220 [Acanthochromis polyacanthus])	None
TRINITY_DN20173_c2_g1	-1.55622	2.76e-10	2.55e-09	yes	down	32.13	20.57	None	None
TRINITY_DN48529_c0_g1	-1.61406	2.79e-10	2.58e-09	yes	down	50.94	68.13	None	None
TRINITY_DN35634_c4_g1	-1.93248	2.87e-10	2.65e-09	yes	down	5.52	1.95	None	None
TRINITY_DN25113_c1_g1	-2.51777	2.99e-10	2.75e-09	yes	down	0.56	0.1	XP_014834495.1(PREDICTED: uncharacterized protein LOC106912169 isoform X2 [Poecilia mexicana])	gi|13124684|sp|P04146.3|COPIA_DROME(RecName: Full=Copia protein; AltName: Full=Gag-int-pol protein; Contains: RecName: Full=Copia VLP protein; Contains: RecName: Full=Copia protease)
TRINITY_DN38994_c0_g2	-2.51777	2.99e-10	2.75e-09	yes	down	1.82	0.38	XP_017208786.1(uncharacterized protein LOC108181108 [Danio rerio])	None
TRINITY_DN26515_c1_g1	-1.5267	3e-10	2.77e-09	yes	down	2.98	1.08	KKF10956.1(Retrovirus-related Pol polyprotein LINE-1 [Larimichthys crocea])	gi|60392921|sp|P11369.2|LORF2_MOUSE(RecName: Full=LINE-1 retrotransposable element ORF2 protein; Short=ORF2p; AltName: Full=Long interspersed element-1; Short=L1; AltName: Full=Retrovirus-related Pol polyprotein LINE-1; Includes: RecName: Full=Reverse transcriptase; Includes: RecName: Full=Endonuclease)
TRINITY_DN44751_c0_g2	-3.36577	3.05e-10	2.81e-09	yes	down	23.95	8.5	None	None
TRINITY_DN46859_c2_g2	-3.36577	3.05e-10	2.81e-09	yes	down	9.19	0.77	XP_021331267.1(uncharacterized protein LOC110439519 [Danio rerio])	gi|38258172|sp|Q8I7P9.1|POL5_DROME(RecName: Full=Retrovirus-related Pol polyprotein from transposon opus; Includes: RecName: Full=Protease; Includes: RecName: Full=Reverse transcriptase; Includes: RecName: Full=Endonuclease)
TRINITY_DN25525_c1_g1	2.41512	3.05e-10	2.81e-09	yes	up	0.54	3.01	XP_018952112.1(PREDICTED: uncharacterized protein LOC109081582 [Cyprinus carpio])	None
TRINITY_DN29603_c1_g1	2.41512	3.05e-10	2.81e-09	yes	up	0.2	3.71	XP_016424947.1(PREDICTED: parathyroid hormone/parathyroid hormone-related peptide receptor-like [Sinocyclocheilus rhinocerous])	gi|1172742|sp|P25107.2|PTH1R_DIDVI(RecName: Full=Parathyroid hormone/parathyroid hormone-related peptide receptor; AltName: Full=PTH/PTHrP type I receptor; Short=PTH/PTHr receptor; AltName: Full=Parathyroid hormone 1 receptor; Short=PTH1 receptor; Flags: Precursor)
TRINITY_DN22338_c3_g1	5.06218	3.08e-10	2.83e-09	yes	up	0.07	4.67	None	None
TRINITY_DN32431_c0_g3	-1.18977	3.09e-10	2.84e-09	yes	down	12.53	5.53	None	None
TRINITY_DN31760_c0_g1	-1.42091	3.1e-10	2.85e-09	yes	down	1.51	0.59	XP_016316543.1(PREDICTED: myosin-11-like [Sinocyclocheilus anshuiensis])	gi|74761033|sp|Q96PL5.1|ERMAP_HUMAN(RecName: Full=Erythroid membrane-associated protein; Short=hERMAP; AltName: Full=Radin blood group antigen; AltName: Full=Scianna blood group antigen; Flags: Precursor)
TRINITY_DN20603_c0_g1	-2.13491	3.18e-10	2.91e-09	yes	down	19.73	6.16	XP_018919376.1(PREDICTED: coiled-coil-helix-coiled-coil-helix domain-containing protein 10, mitochondrial-like [Cyprinus carpio])	gi|74731006|sp|Q8WYQ3.1|CHC10_HUMAN(RecName: Full=Coiled-coil-helix-coiled-coil-helix domain-containing protein 10, mitochondrial; AltName: Full=Protein N27C7-4; Flags: Precursor)
TRINITY_DN21332_c1_g7	-5.33977	3.19e-10	2.92e-09	yes	down	0.54	0.01	XP_018930867.1(PREDICTED: uncharacterized protein LOC109058100 [Cyprinus carpio])	gi|134083|sp|P21328.1|RTJK_DROME(RecName: Full=RNA-directed DNA polymerase from mobile element jockey; AltName: Full=Reverse transcriptase)
TRINITY_DN46108_c2_g1	-5.33977	3.19e-10	2.92e-09	yes	down	6.22	0.21	None	None
TRINITY_DN44990_c0_g2	-1.95834	3.19e-10	2.92e-09	yes	down	26.24	9.42	None	None
TRINITY_DN46103_c2_g1	-1.16108	3.2e-10	2.93e-09	yes	down	2.66	1.54	KTF93695.1(hypothetical protein cypCar_00002723 [Cyprinus carpio])	gi|82108195|sp|Q90X49.1|CCD80_DANRE(RecName: Full=Coiled-coil domain-containing protein 80; Flags: Precursor)
TRINITY_DN21020_c2_g1	-6.33977	3.41e-10	3.11e-09	yes	down	8.75	0	None	None
TRINITY_DN21591_c2_g1	-3.16985	3.41e-10	3.11e-09	yes	down	20.51	1.88	None	None
TRINITY_DN42249_c1_g2	2.0601	3.43e-10	3.13e-09	yes	up	1.06	6.19	KKF32479.1(RNA-directed DNA polymerase from mobile element jockey [Larimichthys crocea])	gi|134083|sp|P21328.1|RTJK_DROME(RecName: Full=RNA-directed DNA polymerase from mobile element jockey; AltName: Full=Reverse transcriptase)
TRINITY_DN35610_c1_g3	-1.20461	3.49e-10	3.19e-09	yes	down	87.23	40.58	None	None
TRINITY_DN28101_c2_g2	-2.67389	3.5e-10	3.2e-09	yes	down	1.05	0.58	XP_021331267.1(uncharacterized protein LOC110439519 [Danio rerio])	gi|130398|sp|P20825.1|POL2_DROME(RecName: Full=Retrovirus-related Pol polyprotein from transposon 297; Includes: RecName: Full=Protease; Includes: RecName: Full=Reverse transcriptase; Includes: RecName: Full=Endonuclease)
TRINITY_DN26070_c2_g3	-1.34508	3.55e-10	3.24e-09	yes	down	11.87	3.93	XP_018958594.1(PREDICTED: cocaine- and amphetamine-regulated transcript protein-like [Cyprinus carpio])	gi|75043221|sp|Q68RJ9.1|CART_BOVIN(RecName: Full=Cocaine- and amphetamine-regulated transcript protein; Contains: RecName: Full=CART(1-39); Contains: RecName: Full=CART(42-89); Flags: Precursor)
TRINITY_DN36806_c2_g2	-2.77091	3.62e-10	3.3e-09	yes	down	4.48	2.53	XP_018932982.1(PREDICTED: CD48 antigen-like, partial [Cyprinus carpio])	None
TRINITY_DN43254_c0_g1	1.35539	3.62e-10	3.3e-09	yes	up	14.83	64.17	XP_018924528.1(PREDICTED: calpain-3-like [Cyprinus carpio])	gi|32130420|sp|P43368.2|CAN3_PIG(RecName: Full=Calpain-3; AltName: Full=Calcium-activated neutral proteinase 3; Short=CANP 3; AltName: Full=Calpain L3; AltName: Full=Calpain p94; AltName: Full=Muscle-specific calcium-activated neutral protease 3; AltName: Full=New calpain 1; Short=nCL-1)
TRINITY_DN28873_c1_g1	-2.76931	3.66e-10	3.33e-09	yes	down	4.45	0.73	None	None
TRINITY_DN29706_c0_g1	-2.76931	3.66e-10	3.33e-09	yes	down	1.5	0.23	None	None
TRINITY_DN42735_c0_g1	-1.09868	3.68e-10	3.35e-09	yes	down	7.73	2.66	XP_016151070.1(PREDICTED: transforming acidic coiled-coil-containing protein 3-like isoform X2 [Sinocyclocheilus grahami])	gi|288558828|sp|Q9PTG8.2|TACC3_XENLA(RecName: Full=Transforming acidic coiled-coil-containing protein 3; AltName: Full=Cytoplasmic polyadenylation element-binding protein-associated factor Maskin; Short=CPEB-associated factor Maskin)
TRINITY_DN42790_c1_g1	-1.43436	3.85e-10	3.49e-09	yes	down	48.5	24.25	None	None
TRINITY_DN36816_c3_g1	1.97224	3.9e-10	3.54e-09	yes	up	1.96	11.76	None	None
TRINITY_DN41873_c0_g2	2.57909	3.93e-10	3.56e-09	yes	up	0.13	0.84	XP_016321769.1(PREDICTED: heat-stable enterotoxin receptor-like [Sinocyclocheilus anshuiensis])	gi|2506471|sp|P55204.2|GUC2C_PIG(RecName: Full=Heat-stable enterotoxin receptor; Short=STA receptor; AltName: Full=Guanylyl cyclase C; Short=GC-C; AltName: Full=Intestinal guanylate cyclase; Flags: Precursor)
TRINITY_DN23589_c1_g2	2.57909	3.93e-10	3.56e-09	yes	up	1.78	11.13	XP_016107281.1(PREDICTED: uncharacterized protein LOC107566360 [Sinocyclocheilus grahami])	None
TRINITY_DN19003_c0_g1	-3.91987	4.04e-10	3.66e-09	yes	down	10.8	0.73	None	None
TRINITY_DN44304_c0_g2	1.41097	4.06e-10	3.68e-09	yes	up	2.7	7.36	XP_016322212.1(PREDICTED: mucin-2-like [Sinocyclocheilus anshuiensis])	gi|239977559|sp|Q80Z19.2|MUC2_MOUSE(RecName: Full=Mucin-2; Short=MUC-2; AltName: Full=Colonic mucin; Short=MCM; AltName: Full=Secreted gel-forming mucin; Flags: Precursor)
TRINITY_DN24066_c2_g1	-2.37066	4.23e-10	3.82e-09	yes	down	4.23	6.13	XP_018946899.1(PREDICTED: uncharacterized protein LOC109075446 isoform X1 [Cyprinus carpio])	None
TRINITY_DN25833_c0_g2	-2.47277	4.23e-10	3.82e-09	yes	down	36.86	5.93	None	None
TRINITY_DN31564_c2_g2	2.6819	4.25e-10	3.84e-09	yes	up	0.68	8.07	None	None
TRINITY_DN24196_c0_g1	2.6819	4.25e-10	3.84e-09	yes	up	1.66	10.79	None	None
TRINITY_DN38113_c0_g1	1.00374	4.39e-10	3.96e-09	yes	up	1.82	3.84	XP_005164763.1(ATP-binding cassette sub-family C member 9 isoform X6 [Danio rerio])	gi|215273925|sp|O60706.2|ABCC9_HUMAN(RecName: Full=ATP-binding cassette sub-family C member 9; AltName: Full=Sulfonylurea receptor 2)
TRINITY_DN38702_c2_g2	-1.86242	4.39e-10	3.96e-09	yes	down	25.8	8.4	None	None
TRINITY_DN49051_c2_g2	-3.3464	4.4e-10	3.96e-09	yes	down	9.49	1.36	None	None
TRINITY_DN32891_c0_g1	-3.11125	4.48e-10	4.03e-09	yes	down	39.52	8.87	None	None
TRINITY_DN38221_c4_g2	-1.10273	4.58e-10	4.12e-09	yes	down	12.53	5.39	None	None
TRINITY_DN18171_c0_g2	-4.52685	4.65e-10	4.17e-09	yes	down	1.73	2.07	None	None
TRINITY_DN33408_c0_g1	1.14114	4.69e-10	4.21e-09	yes	up	4.56	6.68	NP_956774.1(cytoplasmic dynein 2 light intermediate chain 1 [Danio rerio])	gi|82187683|sp|Q7SXY4.1|DC2L1_DANRE(RecName: Full=Cytoplasmic dynein 2 light intermediate chain 1)
TRINITY_DN35554_c1_g1	-2.36626	4.69e-10	4.21e-09	yes	down	22.85	4.01	None	None
TRINITY_DN43338_c1_g3	1.59097	4.73e-10	4.25e-09	yes	up	1.28	3.9	XP_016318282.1(PREDICTED: laminin subunit alpha-4 [Sinocyclocheilus anshuiensis])	gi|17865485|sp|P97927.2|LAMA4_MOUSE(RecName: Full=Laminin subunit alpha-4; AltName: Full=Laminin-14 subunit alpha; AltName: Full=Laminin-8 subunit alpha; AltName: Full=Laminin-9 subunit alpha; Flags: Precursor)
TRINITY_DN22308_c2_g1	-1.2553	4.83e-10	4.33e-09	yes	down	21.13	9.27	None	None
TRINITY_DN31037_c0_g2	1.57136	4.9e-10	4.39e-09	yes	up	1.56	4.82	None	None
TRINITY_DN42582_c0_g1	1.33598	4.97e-10	4.45e-09	yes	up	1.9	5.16	XP_016102439.1(PREDICTED: venom phosphodiesterase 2-like [Sinocyclocheilus grahami])	gi|597501012|sp|J3SBP3.1|PDE2_CROAD(RecName: Full=Venom phosphodiesterase 2; AltName: Full=Ectonucleotide pyrophosphatase/phosphodiesterase family member 3; Short=PDE-3; Includes: RecName: Full=Alkaline phosphodiesterase I; Short=PDE; Includes: RecName: Full=Nucleotide pyrophosphatase; Short=NPPase; Flags: Precursor)
TRINITY_DN31910_c0_g3	-1.93923	5.39e-10	4.82e-09	yes	down	7.34	1.81	None	None
TRINITY_DN25103_c2_g1	-2.49177	5.42e-10	4.85e-09	yes	down	20.43	3.27	XP_021331276.1(zinc finger protein 260-like isoform X1 [Danio rerio])	gi|68566211|sp|Q8N988.2|ZN557_HUMAN(RecName: Full=Zinc finger protein 557)
TRINITY_DN46433_c1_g2	-1.73832	5.47e-10	4.89e-09	yes	down	17.63	5.52	None	None
TRINITY_DN43980_c0_g3	-1.55844	5.48e-10	4.9e-09	yes	down	17.7	6.29	None	None
TRINITY_DN24313_c1_g3	1.47016	5.48e-10	4.9e-09	yes	up	4.88	16.26	None	None
TRINITY_DN39091_c1_g1	1.02959	5.5e-10	4.91e-09	yes	up	4.24	4.22	XP_016414733.1(PREDICTED: pleckstrin homology domain-containing family A member 8 isoform X1 [Sinocyclocheilus rhinocerous])	gi|82196711|sp|Q5U3N0.1|PKHA8_DANRE(RecName: Full=Pleckstrin homology domain-containing family A member 8; Short=PH domain-containing family A member 8)
TRINITY_DN47276_c2_g3	-2.11354	5.51e-10	4.92e-09	yes	down	5.14	1.24	None	None
TRINITY_DN37361_c0_g1	-1.45404	5.51e-10	4.92e-09	yes	down	23.26	13.62	None	None
TRINITY_DN38255_c1_g2	-1.42544	5.55e-10	4.95e-09	yes	down	6.35	1.94	XP_016357857.1(PREDICTED: kinetochore protein Nuf2 isoform X1 [Sinocyclocheilus anshuiensis])	gi|82188761|sp|Q7ZW63.1|NUF2_DANRE(RecName: Full=Kinetochore protein Nuf2; AltName: Full=Cell division cycle-associated protein 1)
TRINITY_DN26228_c1_g1	1.92185	5.57e-10	4.96e-09	yes	up	3.3	9.96	None	None
TRINITY_DN19650_c0_g1	-2.05824	5.79e-10	5.16e-09	yes	down	18.29	4.16	XP_016419691.1(PREDICTED: tripartite motif-containing protein 16-like isoform X1 [Sinocyclocheilus rhinocerous])	gi|116242825|sp|Q14134.2|TRI29_HUMAN(RecName: Full=Tripartite motif-containing protein 29; AltName: Full=Ataxia telangiectasia group D-associated protein)
TRINITY_DN17222_c0_g1	-5.35427	5.85e-10	5.21e-09	yes	down	4.65	0.12	XP_023207243.1(uncharacterized protein LOC102229526 isoform X1 [Xiphophorus maculatus])	None
TRINITY_DN31981_c0_g1	-3.331	5.87e-10	5.22e-09	yes	down	17.99	0.52	DAA01994.1(TPA_exp: polyprotein [Danio rerio])	None
TRINITY_DN33856_c1_g2	-3.331	5.87e-10	5.22e-09	yes	down	0.57	0.06	XP_017214605.1(uncharacterized protein LOC108192163 [Danio rerio])	gi|126296|sp|P08548.1|LIN1_NYCCO(RecName: Full=LINE-1 reverse transcriptase homolog)
TRINITY_DN20814_c1_g1	-3.331	5.87e-10	5.22e-09	yes	down	8.94	1.35	None	None
TRINITY_DN24859_c0_g1	-1.05318	6.02e-10	5.35e-09	yes	down	14.91	7.53	None	None
TRINITY_DN46379_c1_g1	3.6223	6.04e-10	5.37e-09	yes	up	0.96	0.81	XP_023806938.1(uncharacterized protein K02A2.6-like [Oryzias latipes])	gi|558446106|sp|P0CT34.1|TF21_SCHPO(RecName: Full=Transposon Tf2-1 polyprotein; AltName: Full=Retrotransposable element Tf2 155 kDa protein >gi|558446108|sp|P0CT35.1|TF22_SCHPO RecName: Full=Transposon Tf2-2 polyprotein; AltName: Full=Retrotransposable element Tf2 155 kDa protein >gi|558446112|sp|P0CT37.1|TF24_SCHPO RecName: Full=Transposon Tf2-4 polyprotein; AltName: Full=Retrotransposable eleme…
TRINITY_DN38657_c3_g1	-5.29538	6.05e-10	5.37e-09	yes	down	2.44	0.07	None	None
TRINITY_DN43662_c1_g2	-5.29538	6.05e-10	5.37e-09	yes	down	4.02	0.11	XP_023808666.1(uncharacterized protein LOC101166204 isoform X3 [Oryzias latipes])	gi|44887863|sp|P60507.1|EFC1_HUMAN(RecName: Full=Endogenous retrovirus group FC1 Env polyprotein; AltName: Full=Envelope polyprotein; AltName: Full=Fc1env; AltName: Full=HERV-F(c)1_Xq21.33 provirus ancestral Env polyprotein; AltName: Full=HERV-Fc1env; Contains: RecName: Full=Surface protein; Short=SU; Contains: RecName: Full=Transmembrane protein; Short=TM; Flags: Precursor)
TRINITY_DN47865_c2_g1	-5.29538	6.05e-10	5.37e-09	yes	down	3.14	0.29	None	None
TRINITY_DN32308_c1_g3	-6.29538	6.12e-10	5.43e-09	yes	down	2.42	0	XP_016300191.1(PREDICTED: uncharacterized protein LOC107656760 [Sinocyclocheilus anshuiensis])	None
TRINITY_DN34462_c0_g1	-6.29538	6.12e-10	5.43e-09	yes	down	9.11	0	None	None
TRINITY_DN40688_c0_g2	-6.29538	6.12e-10	5.43e-09	yes	down	0.89	0	XP_016100208.1(PREDICTED: 1,25-dihydroxyvitamin D(3) 24-hydroxylase, mitochondrial [Sinocyclocheilus grahami])	gi|19862747|sp|Q07973.2|CP24A_HUMAN(RecName: Full=1,25-dihydroxyvitamin D(3) 24-hydroxylase, mitochondrial; Short=24-OHase; Short=Vitamin D(3) 24-hydroxylase; AltName: Full=Cytochrome P450 24A1; AltName: Full=Cytochrome P450-CC24; Flags: Precursor)
TRINITY_DN44067_c1_g2	-1.00391	6.17e-10	5.46e-09	yes	down	6.81	3.31	XP_016403144.1(PREDICTED: von Willebrand factor [Sinocyclocheilus rhinocerous])	gi|12644030|sp|Q28295.2|VWF_CANFA(RecName: Full=von Willebrand factor; Short=vWF; Flags: Precursor)
TRINITY_DN44922_c1_g2	-1.63635	6.21e-10	5.5e-09	yes	down	32.34	5.67	None	None
TRINITY_DN35234_c0_g1	-4.38284	6.22e-10	5.5e-09	yes	down	6.07	0.34	XP_016326222.1(PREDICTED: C-C motif chemokine 13-like [Sinocyclocheilus anshuiensis])	gi|85541992|sp|Q8HYP8.1|CCL18_MACMU(RecName: Full=C-C motif chemokine 18; AltName: Full=Small-inducible cytokine A18; Flags: Precursor)
TRINITY_DN39662_c2_g4	-1.51777	6.26e-10	5.54e-09	yes	down	30.53	17.54	None	None
TRINITY_DN42476_c1_g1	4.13089	6.34e-10	5.61e-09	yes	up	0.05	0.77	None	None
TRINITY_DN34985_c2_g1	1.88216	6.35e-10	5.62e-09	yes	up	11.66	13.51	None	None
TRINITY_DN22116_c0_g2	-1.4786	6.42e-10	5.67e-09	yes	down	7.73	2.91	XP_021335894.1(protachykinin-1-like isoform X2 [Danio rerio])	gi|288558830|sp|P25421.2|TKN1_CARAU(RecName: Full=Protachykinin; AltName: Full=Gamma-preprotachykinin; Short=Gamma-PPT; Contains: RecName: Full=Substance P; Short=SP; Contains: RecName: Full=Neuropeptide gamma; AltName: Full=Carassin; Contains: RecName: Full=Neurokinin A; Short=NKA; Contains: RecName: Full=C-terminal-flanking peptide; Flags: Precursor)
TRINITY_DN24883_c0_g3	-1.22736	6.42e-10	5.67e-09	yes	down	20.75	16.61	None	None
TRINITY_DN44676_c0_g2	-3.13668	6.51e-10	5.74e-09	yes	down	6.73	0.71	None	None
TRINITY_DN30411_c1_g2	-1.51553	6.53e-10	5.76e-09	yes	down	10.32	3.13	None	None
TRINITY_DN19827_c0_g1	1.13903	6.67e-10	5.88e-09	yes	up	3.38	7.02	XP_017206513.1(elastin a isoform X4 [Danio rerio])	None
TRINITY_DN28167_c0_g1	1.13903	6.67e-10	5.88e-09	yes	up	6.54	12.08	XP_016416320.1(PREDICTED: CD82 antigen-like [Sinocyclocheilus rhinocerous])	gi|9296930|sp|O70352.1|CD82_RAT(RecName: Full=CD82 antigen; AltName: Full=Metastasis suppressor Kangai-1 homolog; AltName: CD_antigen=CD82)
TRINITY_DN28326_c0_g3	-2.97987	6.87e-10	6.04e-09	yes	down	1.7	0.23	BAB83841.1(ReO_6 [Oryzias latipes])	gi|134083|sp|P21328.1|RTJK_DROME(RecName: Full=RNA-directed DNA polymerase from mobile element jockey; AltName: Full=Reverse transcriptase)
TRINITY_DN48778_c3_g1	-2.97987	6.87e-10	6.04e-09	yes	down	1.53	0.2	None	None
TRINITY_DN23358_c0_g2	5.00767	6.9e-10	6.06e-09	yes	up	0.16	5.23	None	None
TRINITY_DN43118_c0_g1	3.11062	6.94e-10	6.1e-09	yes	up	0.37	3.43	XP_018920724.1(PREDICTED: uncharacterized protein LOC109047471 [Cyprinus carpio])	None
TRINITY_DN43254_c0_g2	3.11062	6.94e-10	6.1e-09	yes	up	1.53	13.82	None	None
TRINITY_DN46474_c1_g3	-2.84996	6.95e-10	6.11e-09	yes	down	3.86	0.56	XP_010779020.1(PREDICTED: uncharacterized protein LOC104953734, partial [Notothenia coriiceps])	None
TRINITY_DN28324_c0_g1	2.65882	7e-10	6.15e-09	yes	up	0.16	3.45	XP_023815343.1(uncharacterized protein K02A2.6-like isoform X2 [Oryzias latipes])	gi|1353154|sp|Q09575.1|YRD6_CAEEL(RecName: Full=Uncharacterized protein K02A2.6)
TRINITY_DN40886_c0_g1	2.18267	7.01e-10	6.16e-09	yes	up	0.37	1.57	XP_016088948.1(PREDICTED: cadherin-5-like [Sinocyclocheilus grahami])	gi|586946301|sp|Q8AYD0.2|CADH5_CHICK(RecName: Full=Cadherin-5; AltName: Full=Vascular endothelial cadherin; Short=VE-cadherin; Flags: Precursor)
TRINITY_DN46324_c1_g1	-1.99299	7.06e-10	6.19e-09	yes	down	14.29	3.45	None	None
TRINITY_DN42593_c1_g2	-1.27431	7.12e-10	6.25e-09	yes	down	22.48	10.81	NP_001018412.1(ankyrin repeat and SOCS box protein 6 [Danio rerio])	None
TRINITY_DN29092_c1_g2	-1.6173	7.25e-10	6.36e-09	yes	down	10.2	9.45	XP_023121524.1(uncharacterized protein LOC111565595 [Amphiprion ocellaris])	None
TRINITY_DN32576_c0_g2	1.94855	7.39e-10	6.48e-09	yes	up	0.83	2.37	XP_017213610.2(uncharacterized protein LOC108191529 [Danio rerio])	gi|37999826|sp|Q9Y5F6.1|PCDGM_HUMAN(RecName: Full=Protocadherin gamma-C5; Short=PCDH-gamma-C5; Flags: Precursor)
TRINITY_DN24788_c0_g1	1.47526	7.59e-10	6.65e-09	yes	up	2.31	2.84	XP_015799463.1(PREDICTED: zinc finger BED domain-containing protein 1-like [Nothobranchius furzeri])	gi|41018380|sp|O96006.1|ZBED1_HUMAN(RecName: Full=Zinc finger BED domain-containing protein 1; AltName: Full=Putative Ac-like transposable element; AltName: Full=dREF homolog)
TRINITY_DN41685_c0_g1	-2.63822	7.61e-10	6.66e-09	yes	down	31.15	9.68	None	None
TRINITY_DN34228_c0_g1	-3.88034	7.89e-10	6.89e-09	yes	down	0.72	0.05	XP_016348065.1(PREDICTED: piggyBac transposable element-derived protein 4-like [Sinocyclocheilus anshuiensis])	gi|269849663|sp|Q96DM1.3|PGBD4_HUMAN(RecName: Full=PiggyBac transposable element-derived protein 4)
TRINITY_DN45513_c1_g1	-1.35525	7.9e-10	6.9e-09	yes	down	16.94	18.33	None	None
TRINITY_DN40959_c2_g4	-1.05075	8e-10	6.99e-09	yes	down	15.94	8.06	AAH49500.1(Tpi1a protein [Danio rerio])	gi|123889553|sp|Q1MTI4.1|TPISA_DANRE(RecName: Full=Triosephosphate isomerase A; Short=TIM-A; AltName: Full=Triose-phosphate isomerase A)
TRINITY_DN18751_c0_g1	2.02655	8.25e-10	7.19e-09	yes	up	1.79	6.41	XP_018953377.1(PREDICTED: otospiralin [Cyprinus carpio])	gi|56404628|sp|Q8R448.1|OTOSP_MOUSE(RecName: Full=Otospiralin; AltName: Full=Organ of Corti 10 kDa protein; Flags: Precursor)
TRINITY_DN26038_c0_g4	-4.91686	8.45e-10	7.35e-09	yes	down	1.41	0.06	XP_005174278.4(neuronal acetylcholine receptor subunit alpha-7-like isoform X1 [Danio rerio])	gi|1703074|sp|P54131.1|ACHA7_BOVIN(RecName: Full=Neuronal acetylcholine receptor subunit alpha-7; Flags: Precursor)
TRINITY_DN23114_c2_g1	3.64322	8.45e-10	7.35e-09	yes	up	1.35	25.62	None	None
TRINITY_DN29067_c1_g1	3.64322	8.45e-10	7.35e-09	yes	up	0.85	3.5	XP_022542502.1(zinc finger protein 658B-like, partial [Astyanax mexicanus])	gi|85681870|sp|Q15937.2|ZNF79_HUMAN(RecName: Full=Zinc finger protein 79; AltName: Full=ZNFpT7)
TRINITY_DN33070_c1_g1	1.90626	8.5e-10	7.39e-09	yes	up	0.21	0.83	XP_016361828.1(PREDICTED: tenascin-X-like [Sinocyclocheilus anshuiensis])	gi|857434950|sp|P22105.4|TENX_HUMAN(RecName: Full=Tenascin-X; Short=TN-X; AltName: Full=Hexabrachion-like protein; Flags: Precursor)
[truncated: 3,031 more rows]

## Sheet: diff_detail_Pituitary
Gene_id	Log2FC(P_4n/P_2n)	Pvalue	Padjust	Significant	Regulate	P_2n	P_4n	NR description	swissprot
TRINITY_DN29207_c0_g1	-2.54718	0	0	yes	down	1838.89	423.78	AAQ19263.1(growth hormone [Misgurnus anguillicaudatus])	gi|17369817|sp|Q9W6J5.1|SOMA_MISMI(RecName: Full=Somatotropin; AltName: Full=Growth hormone; Flags: Precursor [Misgurnus mizolepis])
TRINITY_DN34538_c2_g1	-11.8857	0	0	yes	down	735.52	0.18	YP_008815851.1(NADH dehydrogenase subunit 1 (mitochondrion) [Misgurnus bipartitus])	gi|6647593|sp|O78679.1|NU1M_CARAU(RecName: Full=NADH-ubiquinone oxidoreductase chain 1; AltName: Full=NADH dehydrogenase subunit 1 (mitochondrion) [Carassius auratus])
TRINITY_DN22319_c0_g1	1.75964	0	0	yes	up	3082.67	12578.7	YP_008815855.1(ATP synthase F0 subunit 8 (mitochondrion) [Misgurnus bipartitus])	gi|6647447|sp|O78683.1|ATP8_CARAU(RecName: Full=ATP synthase protein 8; AltName: Full=A6L; AltName: Full=F-ATPase subunit 8)
TRINITY_DN48799_c1_g1	-1.68803	0	0	yes	down	510.37	155.23		gi|82582284|sp|Q6CQE5.2|TAR1_KLULA(RecName: Full=Protein TAR1)
TRINITY_DN35446_c1_g2	6.13753	0	0	yes	up	1.44	96.49	None	None
TRINITY_DN30688_c1_g1	-3.26884	0	0	yes	down	269.35	8.78	XP_024122537.1(uncharacterized protein LOC112143031 [Oryzias melastigma])	gi|60392921|sp|P11369.2|LORF2_MOUSE(RecName: Full=LINE-1 retrotransposable element ORF2 protein; Short=ORF2p; AltName: Full=Long interspersed element-1; Short=L1; AltName: Full=Retrovirus-related Pol polyprotein LINE-1; Includes: RecName: Full=Reverse transcriptase; Includes: RecName: Full=Endonuclease)
TRINITY_DN44685_c0_g1	-3.4045	0	0	yes	down	11.45	5.45	XP_021332670.1(uncharacterized protein LOC110439859 [Danio rerio])	gi|130407|sp|P10394.1|POL4_DROME(RecName: Full=Retrovirus-related Pol polyprotein from transposon 412; Includes: RecName: Full=Protease; Includes: RecName: Full=Reverse transcriptase; Includes: RecName: Full=Endonuclease)
TRINITY_DN21471_c0_g2	-1.26897	0	0	yes	down	605.85	242.73	XP_008434255.2(PREDICTED: tripartite motif-containing protein 65-like [Poecilia reticulata])	None
TRINITY_DN49141_c7_g1	-3.97069	0	0	yes	down	71.88	4.24	XP_019967578.1(PREDICTED: uncharacterized protein LOC109646289, partial [Paralichthys olivaceus])	gi|338819284|sp|O92815.2|POL_WDSV(RecName: Full=Gag-Pol polyprotein; Contains: RecName: Full=Matrix protein p10; Short=MA; Contains: RecName: Full=p20; Contains: RecName: Full=Capsid protein p25; Short=CA; Contains: RecName: Full=Nucleocapsid protein p14; Short=NC-pol; Contains: RecName: Full=Protease p15; Short=PR; Contains: RecName: Full=Reverse transcriptase/ribonuclease H p90; Short=RT; Conta…
TRINITY_DN21350_c1_g1	6.51099	0	0	yes	up	0.29	24.62	XP_017324831.1(PREDICTED: transcription factor Adf-1-like [Ictalurus punctatus])	None
TRINITY_DN24392_c1_g1	5.03616	0	0	yes	up	1.18	36.29	XP_023662857.1(uncharacterized protein LOC111841387 isoform X2 [Paramormyrops kingsleyae])	gi|215274654|sp|A5PKF5.1|THA11_BOVIN(RecName: Full=THAP domain-containing protein 11)
TRINITY_DN21697_c0_g2	-3.56836	0	0	yes	down	20.27	1.62	XP_016374033.1(PREDICTED: receptor tyrosine-protein kinase erbB-3-like [Sinocyclocheilus rhinocerous])	gi|119534|sp|P21860.1|ERBB3_HUMAN(RecName: Full=Receptor tyrosine-protein kinase erbB-3; AltName: Full=Proto-oncogene-like protein c-ErbB-3; AltName: Full=Tyrosine kinase-type cell surface receptor HER3; Flags: Precursor)
TRINITY_DN21753_c0_g2	5.5724	0	0	yes	up	0.66	29.08	XP_018946766.1(PREDICTED: uncharacterized protein LOC109075294 [Cyprinus carpio])	gi|82000294|sp|Q5UQV1.1|YR354_MIMIV(RecName: Full=Uncharacterized protein R354 [Acanthamoeba polyphaga mimivirus])
TRINITY_DN41471_c1_g2	-4.27056	0	0	yes	down	1279.86	56.96	None	None
TRINITY_DN20712_c3_g3	-2.93524	0	0	yes	down	239.94	46.79	BAK39638.1(follicle-stimulating hormone beta [Misgurnus anguillicaudatus])	gi|11132759|sp|O13050.1|GTHB1_CYPCA(RecName: Full=Gonadotropin subunit beta-1; AltName: Full=Follicle-stimulating hormone-like GTH; AltName: Full=GTH-I-beta; AltName: Full=Gonadotropin beta-I chain; Flags: Precursor [Cyprinus carpio])
TRINITY_DN42428_c0_g3	-6.8125	0	0	yes	down	48.26	1.52	None	None
TRINITY_DN47580_c4_g1	-6.08108	0	0	yes	down	271.44	3.8	None	None
TRINITY_DN47332_c3_g2	-2.68067	0	0	yes	down	366.65	54.03	YP_008815862.1(NADH dehydrogenase subunit 6 (mitochondrion) [Misgurnus bipartitus])	gi|464251|sp|P34196.1|NU6M_FORLA(RecName: Full=NADH-ubiquinone oxidoreductase chain 6; AltName: Full=NADH dehydrogenase subunit 6 (mitochondrion) [Formosania lacustris])
TRINITY_DN22172_c0_g1	-12.686	0	0	yes	down	2937	0	ACF93164.1(cytochrome oxidase subunit I (mitochondrion) [Misgurnus anguillicaudatus])	gi|231844|sp|P29646.1|COX1_GOMVA(RecName: Full=Cytochrome c oxidase subunit 1; AltName: Full=Cytochrome c oxidase polypeptide I)
TRINITY_DN41123_c2_g2	-1.07901	0	0	yes	down	2072.21	824.28	None	None
TRINITY_DN47364_c2_g1	3.92499	0	0	yes	up	0.52	7.53	XP_019219814.1(PREDICTED: uncharacterized protein LOC106098743 [Oreochromis niloticus])	gi|38258172|sp|Q8I7P9.1|POL5_DROME(RecName: Full=Retrovirus-related Pol polyprotein from transposon opus; Includes: RecName: Full=Protease; Includes: RecName: Full=Reverse transcriptase; Includes: RecName: Full=Endonuclease)
TRINITY_DN45909_c0_g1	4.13287	0	0	yes	up	21.89	346.66	None	None
TRINITY_DN25450_c0_g1	-4.99215	0	0	yes	down	78.64	2.34	AAO25757.1(parvalbumin, partial [Ictalurus punctatus])	gi|124012139|sp|P09227.2|PRVA_CYPCA(RecName: Full=Parvalbumin alpha; AltName: Full=A1)
TRINITY_DN28406_c0_g1	3.65425	0	0	yes	up	118.16	1519.57	None	None
TRINITY_DN24551_c0_g2	-6.04352	0	0	yes	down	101.98	1.48	ARO85815.1(MHC class I antigen [Ctenopharyngodon idella])	gi|231429|sp|P30501.1|1C02_HUMAN(RecName: Full=HLA class I histocompatibility antigen, Cw-2 alpha chain; AltName: Full=MHC class I antigen Cw*2; Flags: Precursor)
TRINITY_DN24185_c2_g3	-1.13866	0	0	yes	down	683.18	287.31	BAK39639.1(luteinizing hormone-beta [Misgurnus anguillicaudatus])	gi|11133067|sp|Q98849.1|GTHB2_CARAU(RecName: Full=Gonadotropin subunit beta-2; AltName: Full=GTH-II-beta; AltName: Full=Gonadotropin beta-II chain; AltName: Full=Luteinizing hormone-like GTH; Flags: Precursor [Carassius auratus])
TRINITY_DN48639_c2_g2	-1.2174	0	0	yes	down	182.42	80.04	AFM85458.1(hypothetical protein [Callorhinchus milii])	None
TRINITY_DN40445_c1_g4	-1.85002	0	0	yes	down	550.12	159.82	ABN46996.1(somatolactin alpha [Ctenopharyngodon idella])	gi|134726|sp|P24405.1|SOML_ONCKE(RecName: Full=Somatolactin; Short=SL; Flags: Precursor [Oncorhynchus keta])
TRINITY_DN33263_c0_g1	-2.26312	0	0	yes	down	706.2	166.49	P29235.1(RecName: Full=Prolactin; Short=PRL; Flags: Precursor)	gi|130931|sp|P29235.1|PRL_HYPNO(RecName: Full=Prolactin; Short=PRL; Flags: Precursor [Hypophthalmichthys nobilis])
TRINITY_DN27191_c1_g1	5.54495	0	0	yes	up	1.09	42.99	XP_021324770.1(uncharacterized protein si:dkey-29d5.2 [Danio rerio])	None
TRINITY_DN45029_c1_g1	-5.70259	0	0	yes	down	92.36	2.97	APJ36370.1(immunoglobulin mu heavy chain [Myxocyprinus asiaticus])	gi|754285679|sp|P23735.2|MUCM_ICTPU(RecName: Full=Ig mu chain C region membrane-bound form)
TRINITY_DN27516_c1_g6	-12.7797	0	0	yes	down	501.11	0.07	YP_008815860.1(NADH dehydrogenase subunit 4 (mitochondrion) [Misgurnus bipartitus])	gi|6647611|sp|O78687.1|NU4M_CARAU(RecName: Full=NADH-ubiquinone oxidoreductase chain 4; AltName: Full=NADH dehydrogenase subunit 4)
TRINITY_DN47580_c4_g3	-4.93488	0	0	yes	down	159.03	4.92	XP_013883485.1(PREDICTED: uncharacterized protein LOC106532045 [Austrofundulus limnaeus])	None
TRINITY_DN29441_c2_g3	-2.08177	0	0	yes	down	873.98	397.77	YP_008815852.1(NADH dehydrogenase subunit 2 (mitochondrion) [Misgurnus bipartitus])	gi|462763|sp|P34187.1|NU2M_FORLA(RecName: Full=NADH-ubiquinone oxidoreductase chain 2; AltName: Full=NADH dehydrogenase subunit 2)
TRINITY_DN42846_c0_g1	5.87873	0	0	yes	up	2.06	94.99	XP_018965506.1(PREDICTED: uncharacterized protein LOC109096331 [Cyprinus carpio])	None
TRINITY_DN49214_c15_g1	-2.13649	0	0	yes	down	75.2	14	XP_018949504.1(PREDICTED: uncharacterized protein LOC109078753 [Cyprinus carpio])	gi|400821|sp|P31792.1|POL_FENV1(RecName: Full=Pol polyprotein; Contains: RecName: Full=Reverse transcriptase/ribonuclease H; Short=RT; Contains: RecName: Full=Integrase; Short=IN)
TRINITY_DN32992_c0_g3	5.27102	0	0	yes	up	3.86	115.36	XP_018968102.1(PREDICTED: uncharacterized protein LOC109098997 [Cyprinus carpio])	None
TRINITY_DN35627_c0_g1	-14.6574	0	0	yes	down	1095.94	0	ADF28237.1(cytochrome b, partial (mitochondrion) [Misgurnus cf. mohoity IJ-2010])	gi|30912889|sp|Q94SD0.1|CYB_DACPE(RecName: Full=Cytochrome b; AltName: Full=Complex III subunit 3; AltName: Full=Complex III subunit III; AltName: Full=Cytochrome b-c1 complex subunit 3; AltName: Full=Ubiquinol-cytochrome-c reductase complex cytochrome b subunit)
[truncated: 6,697 more rows]

## Sheet: diff_detail_Liver
Gene_id	Log2FC(L_4n/L_2n)	Pvalue	Padjust	Significant	Regulate	L_2n	L_4n	NR description	swissprot
[truncated: 5,567 more rows]

[truncated: 2 more sheets: diff_detail_Gonad, diff_detail_Muscle]
