# Supplementary material
Source: MDPI journal article supplement (https://www.mdpi.com/2410-3888/7/6/322)
Supplement: s1 [file s1 › Table S4.xlsx]

## Sheet: Sheet1
#	Pathway	DEGs genes with pathway annotation (4205)	Pvalue	Qvalue	Pathway ID	Level 1	Level 2
1	Complement and coagulation cascades	171 (4.07%)	7.03987e-36	2.13308e-33	ko04610	Organismal Systems	Immune system
2	Metabolic pathways	786 (18.69%)	1.11135e-31	1.68369e-29	ko01100	Metabolism	Global and overview maps
3	Staphylococcus aureus infection	135 (3.21%)	8.50584e-23	8.5909e-21	ko05150	Human Diseases	Infectious diseases: Bacterial
4	Glyoxylate and dicarboxylate metabolism	93 (2.21%)	1.80228e-17	1.36523e-15	ko00630	Metabolism	Carbohydrate metabolism
5	Carbon metabolism	144 (3.42%)	3.00393e-16	1.82038e-14	ko01200	Metabolism	Global and overview maps
6	Legionellosis	120 (2.85%)	5.07725e-16	2.56401e-14	ko05134	Human Diseases	Infectious diseases: Bacterial
7	Rheumatoid arthritis	117 (2.78%)	2.08836e-14	9.03963e-13	ko05323	Human Diseases	Immune diseases
8	Pyruvate metabolism	90 (2.14%)	3.12105e-14	1.1821e-12	ko00620	Metabolism	Carbohydrate metabolism
9	Citrate cycle (TCA cycle)	91 (2.16%)	5.01682e-14	1.689e-12	ko00020	Metabolism	Carbohydrate metabolism
10	Proximal tubule bicarbonate reclamation	69 (1.64%)	4.43548e-12	1.34395e-10	ko04964	Organismal Systems	Excretory system
11	Systemic lupus erythematosus	97 (2.31%)	1.15325e-11	3.17668e-10	ko05322	Human Diseases	Immune diseases
12	Cysteine and methionine metabolism	85 (2.02%)	1.4663e-11	3.7024e-10	ko00270	Metabolism	Amino acid metabolism
13	Viral myocarditis	149 (3.54%)	7.60543e-11	1.77265e-09	ko05416	Human Diseases	Cardiovascular diseases
14	Peroxisome	99 (2.35%)	2.44686e-10	5.2957e-09	ko04146	Cellular Processes	Transport and catabolism
15	Sphingolipid metabolism	92 (2.19%)	2.09129e-09	4.22441e-08	ko00600	Metabolism	Lipid metabolism
16	Tuberculosis	183 (4.35%)	2.63911e-09	4.99781e-08	ko05152	Human Diseases	Infectious diseases: Bacterial
17	Malaria	116 (2.76%)	1.14461e-08	2.04009e-07	ko05144	Human Diseases	Infectious diseases: Parasitic
18	Leishmaniasis	186 (4.42%)	1.58108e-08	2.66148e-07	ko05140	Human Diseases	Infectious diseases: Parasitic
19	Natural killer cell mediated cytotoxicity	131 (3.12%)	3.20093e-08	5.10464e-07	ko04650	Organismal Systems	Immune system
20	Phagosome	239 (5.68%)	7.31454e-08	1.10815e-06	ko04145	Cellular Processes	Transport and catabolism
21	Cell adhesion molecules (CAMs)	272 (6.47%)	1.03322e-07	1.49079e-06	ko04514	Environmental Information Processing	Signaling molecules and interaction
22	Glycine, serine and threonine metabolism	58 (1.38%)	3.09832e-07	4.26724e-06	ko00260	Metabolism	Amino acid metabolism
23	Amoebiasis	145 (3.45%)	3.29836e-06	4.34523e-05	ko05146	Human Diseases	Infectious diseases: Parasitic
24	Valine, leucine and isoleucine degradation	45 (1.07%)	4.15498e-06	5.24566e-05	ko00280	Metabolism	Amino acid metabolism
25	Biosynthesis of unsaturated fatty acids	28 (0.67%)	5.3247e-06	6.45353e-05	ko01040	Metabolism	Lipid metabolism
26	Pertussis	208 (4.95%)	1.02884e-05	0.000119899	ko05133	Human Diseases	Infectious diseases: Bacterial
27	Fatty acid metabolism	45 (1.07%)	1.66984e-05	0.000187394	ko01212	Metabolism	Global and overview maps
28	Herpes simplex infection	174 (4.14%)	2.58482e-05	0.000278366	ko05168	Human Diseases	Infectious diseases: Viral
29	Fatty acid elongation	28 (0.67%)	2.66423e-05	0.000278366	ko00062	Metabolism	Lipid metabolism
30	Biosynthesis of amino acids	51 (1.21%)	4.24366e-05	0.00042861	ko01230	Metabolism	Global and overview maps
31	beta-Alanine metabolism	38 (0.9%)	5.13194e-05	0.000501605	ko00410	Metabolism	Metabolism of other amino acids
32	Primary bile acid biosynthesis	19 (0.45%)	5.83258e-05	0.000552272	ko00120	Metabolism	Lipid metabolism
33	Amino sugar and nucleotide sugar metabolism	38 (0.9%)	6.72348e-05	0.000617338	ko00520	Metabolism	Carbohydrate metabolism
34	2-Oxocarboxylic acid metabolism	32 (0.76%)	7.56962e-05	0.000674587	ko01210	Metabolism	Global and overview maps
35	HTLV-I infection	208 (4.95%)	8.66787e-05	0.00075039	ko05166	Human Diseases	Infectious diseases: Viral
36	Hematopoietic cell lineage	121 (2.88%)	0.000130068	0.00109474	ko04640	Organismal Systems	Immune system
37	Neuroactive ligand-receptor interaction	129 (3.07%)	0.000233981	0.00191612	ko04080	Environmental Information Processing	Signaling molecules and interaction
38	Fatty acid degradation	36 (0.86%)	0.000282188	0.00225008	ko00071	Metabolism	Lipid metabolism
39	Leukocyte transendothelial migration	190 (4.52%)	0.000322924	0.00245336	ko04670	Organismal Systems	Immune system
40	Viral carcinogenesis	128 (3.04%)	0.000323876	0.00245336	ko05203	Human Diseases	Cancers: Overview
41	Tryptophan metabolism	39 (0.93%)	0.000446574	0.00330029	ko00380	Metabolism	Amino acid metabolism
42	Autoimmune thyroid disease	44 (1.05%)	0.000475976	0.00343383	ko05320	Human Diseases	Immune diseases
43	Chagas disease (American trypanosomiasis)	82 (1.95%)	0.000528726	0.00372567	ko05142	Human Diseases	Infectious diseases: Parasitic
44	Antigen processing and presentation	46 (1.09%)	0.000567922	0.00391092	ko04612	Organismal Systems	Immune system
45	Graft-versus-host disease	35 (0.83%)	0.00058849	0.0039625	ko05332	Human Diseases	Immune diseases
46	Drug metabolism - other enzymes	36 (0.86%)	0.000704973	0.00464363	ko00983	Metabolism	Xenobiotics biodegradation and metabolism
47	Hippo signaling pathway	124 (2.95%)	0.000731199	0.0047139	ko04390	Environmental Information Processing	Signal transduction
48	Histidine metabolism	30 (0.71%)	0.000782564	0.00493994	ko00340	Metabolism	Amino acid metabolism
49	Porphyrin and chlorophyll metabolism	28 (0.67%)	0.000820592	0.00505644	ko00860	Metabolism	Metabolism of cofactors and vitamins
50	Starch and sucrose metabolism	39 (0.93%)	0.000834397	0.00505644	ko00500	Metabolism	Carbohydrate metabolism
51	Ascorbate and aldarate metabolism	26 (0.62%)	0.000967234	0.00574651	ko00053	Metabolism	Carbohydrate metabolism
52	Nicotine addiction	38 (0.9%)	0.00173851	0.0101302	ko05033	Human Diseases	Substance dependence
53	Allograft rejection	41 (0.98%)	0.00189791	0.0108503	ko05330	Human Diseases	Immune diseases
54	Glycerophospholipid metabolism	67 (1.59%)	0.00195715	0.0108732	ko00564	Metabolism	Lipid metabolism
55	Pentose and glucuronate interconversions	30 (0.71%)	0.00197368	0.0108732	ko00040	Metabolism	Carbohydrate metabolism
56	Type I diabetes mellitus	39 (0.93%)	0.00235056	0.0126052	ko04940	Human Diseases	Endocrine and metabolic diseases
57	mRNA surveillance pathway	103 (2.45%)	0.00237127	0.0126052	ko03015	Genetic Information Processing	Translation
58	Caffeine metabolism	8 (0.19%)	0.00252197	0.0131751	ko00232	Metabolism	Biosynthesis of other secondary metabolites
59	Steroid biosynthesis	18 (0.43%)	0.00265081	0.0136135	ko00100	Metabolism	Lipid metabolism
60	Influenza A	174 (4.14%)	0.00333993	0.0168666	ko05164	Human Diseases	Infectious diseases: Viral
61	Glycerolipid metabolism	43 (1.02%)	0.00349786	0.0169655	ko00561	Metabolism	Lipid metabolism
62	Chemical carcinogenesis	34 (0.81%)	0.00351356	0.0169655	ko05204	Human Diseases	Cancers: Overview
63	Prion diseases	44 (1.05%)	0.00352749	0.0169655	ko05020	Human Diseases	Neurodegenerative diseases
64	Propanoate metabolism	23 (0.55%)	0.00370388	0.0175356	ko00640	Metabolism	Carbohydrate metabolism
65	Retinol metabolism	37 (0.88%)	0.00447618	0.0205497	ko00830	Metabolism	Metabolism of cofactors and vitamins
66	Mineral absorption	37 (0.88%)	0.00447618	0.0205497	ko04978	Organismal Systems	Digestive system
67	Epithelial cell signaling in Helicobacter pylori infection	69 (1.64%)	0.00490128	0.0221655	ko05120	Human Diseases	Infectious diseases: Bacterial
68	PPAR signaling pathway	50 (1.19%)	0.00541892	0.0239013	ko03320	Organismal Systems	Endocrine system
69	Lysosome	78 (1.85%)	0.00544288	0.0239013	ko04142	Cellular Processes	Transport and catabolism
70	Arginine and proline metabolism	45 (1.07%)	0.00633571	0.0274246	ko00330	Metabolism	Amino acid metabolism
71	Steroid hormone biosynthesis	31 (0.74%)	0.00666256	0.0284332	ko00140	Metabolism	Lipid metabolism
72	Glycosphingolipid biosynthesis - lacto and neolacto series	24 (0.57%)	0.00694571	0.0292299	ko00601	Metabolism	Glycan biosynthesis and metabolism
73	Vitamin digestion and absorption	29 (0.69%)	0.00988499	0.0409113	ko04977	Organismal Systems	Digestive system
74	Pantothenate and CoA biosynthesis	13 (0.31%)	0.00999153	0.0409113	ko00770	Metabolism	Metabolism of cofactors and vitamins
75	Glutathione metabolism	33 (0.78%)	0.0103838	0.0419503	ko00480	Metabolism	Metabolism of other amino acids
76	Small cell lung cancer	140 (3.33%)	0.0106836	0.0425937	ko05222	Human Diseases	Cancers: Specific types
77	Platelet activation	204 (4.85%)	0.0113636	0.0447164	ko04611	Organismal Systems	Immune system
78	Toxoplasmosis	162 (3.85%)	0.012604	0.0489615	ko05145	Human Diseases	Infectious diseases: Parasitic
79	Galactose metabolism	20 (0.48%)	0.0131532	0.0504485	ko00052	Metabolism	Carbohydrate metabolism
80	Glycosphingolipid biosynthesis - ganglio series	9 (0.21%)	0.0143832	0.0544765	ko00604	Metabolism	Glycan biosynthesis and metabolism
81	Fat digestion and absorption	35 (0.83%)	0.0150789	0.0562747	ko04975	Organismal Systems	Digestive system
82	Retrograde endocannabinoid signaling	72 (1.71%)	0.0152295	0.0562747	ko04723	Organismal Systems	Nervous system
83	ECM-receptor interaction	126 (3%)	0.0166413	0.0607509	ko04512	Environmental Information Processing	Signaling molecules and interaction
84	Linoleic acid metabolism	23 (0.55%)	0.0177164	0.0639056	ko00591	Metabolism	Lipid metabolism
85	GABAergic synapse	70 (1.66%)	0.0207686	0.0740338	ko04727	Organismal Systems	Nervous system
86	Metabolism of xenobiotics by cytochrome P450	29 (0.69%)	0.0219177	0.0772217	ko00980	Metabolism	Xenobiotics biodegradation and metabolism
87	Intestinal immune network for IgA production	37 (0.88%)	0.0249961	0.0870554	ko04672	Organismal Systems	Immune system
88	Morphine addiction	60 (1.43%)	0.0263007	0.0902748	ko05032	Human Diseases	Substance dependence
89	Shigellosis	142 (3.38%)	0.0265164	0.0902748	ko05131	Human Diseases	Infectious diseases: Bacterial
90	Arachidonic acid metabolism	32 (0.76%)	0.028342	0.0954182	ko00590	Metabolism	Lipid metabolism
91	Rap1 signaling pathway	239 (5.68%)	0.0290933	0.096871	ko04015	Environmental Information Processing	Signal transduction
92	Glycosaminoglycan degradation	14 (0.33%)	0.0316633	0.104282	ko00531	Metabolism	Glycan biosynthesis and metabolism
93	Bile secretion	59 (1.4%)	0.0321612	0.104783	ko04976	Organismal Systems	Digestive system
94	Protein export	9 (0.21%)	0.0340533	0.109768	ko03060	Genetic Information Processing	Folding, sorting and degradation
95	MAPK signaling pathway - fly	23 (0.55%)	0.0344868	0.109995	ko04013	Environmental Information Processing	Signal transduction
96	Pentose phosphate pathway	14 (0.33%)	0.0353195	0.111477	ko00030	Metabolism	Carbohydrate metabolism
97	T cell receptor signaling pathway	78 (1.85%)	0.0360169	0.111815	ko04660	Organismal Systems	Immune system
98	Oxidative phosphorylation	39 (0.93%)	0.0361647	0.111815	ko00190	Metabolism	Energy metabolism
99	Tyrosine metabolism	22 (0.52%)	0.0372319	0.113952	ko00350	Metabolism	Amino acid metabolism
100	Thyroid hormone signaling pathway	134 (3.19%)	0.0443145	0.133416	ko04919	Organismal Systems	Endocrine system
101	cGMP-PKG signaling pathway	122 (2.9%)	0.044472	0.133416	ko04022	Environmental Information Processing	Signal transduction
102	Base excision repair	47 (1.12%)	0.045054	0.133837	ko03410	Genetic Information Processing	Replication and repair
103	alpha-Linolenic acid metabolism	20 (0.48%)	0.0469906	0.138234	ko00592	Metabolism	Lipid metabolism
104	Primary immunodeficiency	36 (0.86%)	0.0477336	0.13907	ko05340	Human Diseases	Immune diseases
105	Drug metabolism - cytochrome P450	29 (0.69%)	0.0488807	0.141056	ko00982	Metabolism	Xenobiotics biodegradation and metabolism
106	Ribosome biogenesis in eukaryotes	45 (1.07%)	0.0518827	0.148306	ko03008	Genetic Information Processing	Translation
107	Pyrimidine metabolism	63 (1.5%)	0.0531903	0.150413	ko00240	Metabolism	Nucleotide metabolism
108	Glycolysis / Gluconeogenesis	30 (0.71%)	0.0540163	0.150413	ko00010	Metabolism	Carbohydrate metabolism
109	Protein processing in endoplasmic reticulum	82 (1.95%)	0.054109	0.150413	ko04141	Genetic Information Processing	Folding, sorting and degradation
110	Valine, leucine and isoleucine biosynthesis	4 (0.1%)	0.0570789	0.156577	ko00290	Metabolism	Amino acid metabolism
111	Regulation of lipolysis in adipocytes	48 (1.14%)	0.05736	0.156577	ko04923	Organismal Systems	Endocrine system
112	Fatty acid biosynthesis	11 (0.26%)	0.0591684	0.160072	ko00061	Metabolism	Lipid metabolism
113	Pathogenic Escherichia coli infection	137 (3.26%)	0.0610911	0.16381	ko05130	Human Diseases	Infectious diseases: Bacterial
114	Salivary secretion	68 (1.62%)	0.062031	0.164872	ko04970	Organismal Systems	Digestive system
115	Terpenoid backbone biosynthesis	13 (0.31%)	0.062798	0.165459	ko00900	Metabolism	Metabolism of terpenoids and polyketides
116	Asthma	18 (0.43%)	0.0642624	0.167858	ko05310	Human Diseases	Immune diseases
117	Sulfur metabolism	6 (0.14%)	0.0652804	0.169059	ko00920	Metabolism	Energy metabolism
118	B cell receptor signaling pathway	53 (1.26%)	0.0668193	0.171578	ko04662	Organismal Systems	Immune system
119	Dilated cardiomyopathy	154 (3.66%)	0.0721735	0.183769	ko05414	Human Diseases	Cardiovascular diseases
120	Arrhythmogenic right ventricular cardiomyopathy (ARVC)	137 (3.26%)	0.0874299	0.22076	ko05412	Human Diseases	Cardiovascular diseases
121	Toll-like receptor signaling pathway	48 (1.14%)	0.0892835	0.222261	ko04620	Organismal Systems	Immune system
122	Glycosaminoglycan biosynthesis - keratan sulfate	14 (0.33%)	0.0894914	0.222261	ko00533	Metabolism	Glycan biosynthesis and metabolism
123	Endocrine and other factor-regulated calcium reabsorption	35 (0.83%)	0.0924953	0.227854	ko04961	Organismal Systems	Excretory system
124	Glycosaminoglycan biosynthesis - heparan sulfate / heparin	24 (0.57%)	0.0968235	0.234959	ko00534	Metabolism	Glycan biosynthesis and metabolism
125	RNA transport	124 (2.95%)	0.0969305	0.234959	ko03013	Genetic Information Processing	Translation
126	Ovarian steroidogenesis	42 (1%)	0.0978	0.235186	ko04913	Organismal Systems	Endocrine system
127	Bacterial invasion of epithelial cells	139 (3.31%)	0.102891	0.245479	ko05100	Human Diseases	Infectious diseases: Bacterial
128	Ether lipid metabolism	27 (0.64%)	0.104821	0.24813	ko00565	Metabolism	Lipid metabolism
129	Long-term depression	43 (1.02%)	0.106756	0.249705	ko04730	Organismal Systems	Nervous system
130	Dorso-ventral axis formation	28 (0.67%)	0.107134	0.249705	ko04320	Organismal Systems	Development
131	Lysine degradation	67 (1.59%)	0.112623	0.259517	ko00310	Metabolism	Amino acid metabolism
132	Basal transcription factors	20 (0.48%)	0.113057	0.259517	ko03022	Genetic Information Processing	Transcription
133	Renin secretion	37 (0.88%)	0.117448	0.265799	ko04924	Organismal Systems	Endocrine system
134	Glycosphingolipid biosynthesis - globo series	6 (0.14%)	0.117548	0.265799	ko00603	Metabolism	Glycan biosynthesis and metabolism
135	Epstein-Barr virus infection	138 (3.28%)	0.12074	0.270995	ko05169	Human Diseases	Infectious diseases: Viral
136	Olfactory transduction	53 (1.26%)	0.121955	0.271709	ko04740	Organismal Systems	Sensory system
137	Maturity onset diabetes of the young	23 (0.55%)	0.123108	0.272276	ko04950	Human Diseases	Endocrine and metabolic diseases
138	Glycosylphosphatidylinositol(GPI)-anchor biosynthesis	21 (0.5%)	0.130178	0.285826	ko00563	Metabolism	Glycan biosynthesis and metabolism
139	Hypertrophic cardiomyopathy (HCM)	140 (3.33%)	0.142069	0.30969	ko05410	Human Diseases	Cardiovascular diseases
140	Nitrogen metabolism	5 (0.12%)	0.14353	0.31064	ko00910	Metabolism	Energy metabolism
141	Purine metabolism	98 (2.33%)	0.146152	0.31407	ko00230	Metabolism	Nucleotide metabolism
142	Butanoate metabolism	14 (0.33%)	0.148153	0.316129	ko00650	Metabolism	Carbohydrate metabolism
143	Mucin type O-Glycan biosynthesis	9 (0.21%)	0.151527	0.320278	ko00512	Metabolism	Glycan biosynthesis and metabolism
144	Pancreatic secretion	58 (1.38%)	0.152211	0.320278	ko04972	Organismal Systems	Digestive system
145	Proteasome	14 (0.33%)	0.178408	0.372811	ko03050	Genetic Information Processing	Folding, sorting and degradation
146	Phenylalanine metabolism	8 (0.19%)	0.181643	0.376971	ko00360	Metabolism	Amino acid metabolism
147	Inflammatory bowel disease (IBD)	27 (0.64%)	0.18694	0.384269	ko05321	Human Diseases	Immune diseases
148	Other glycan degradation	10 (0.24%)	0.187696	0.384269	ko00511	Metabolism	Glycan biosynthesis and metabolism
149	Phenylalanine, tyrosine and tryptophan biosynthesis	3 (0.07%)	0.190141	0.386663	ko00400	Metabolism	Amino acid metabolism
150	Arginine biosynthesis	8 (0.19%)	0.197068	0.398076	ko00220	Metabolism	Amino acid metabolism
151	Alanine, aspartate and glutamate metabolism	17 (0.4%)	0.200796	0.402923	ko00250	Metabolism	Amino acid metabolism
152	Parkinson's disease	35 (0.83%)	0.206897	0.410236	ko05012	Human Diseases	Neurodegenerative diseases
153	Taurine and hypotaurine metabolism	9 (0.21%)	0.207149	0.410236	ko00430	Metabolism	Metabolism of other amino acids
154	Osteoclast differentiation	99 (2.35%)	0.216734	0.426432	ko04380	Organismal Systems	Development
155	Regulation of actin cytoskeleton	229 (5.45%)	0.219344	0.428782	ko04810	Cellular Processes	Cell motility
156	SNARE interactions in vesicular transport	13 (0.31%)	0.231231	0.44714	ko04130	Genetic Information Processing	Folding, sorting and degradation
157	Fructose and mannose metabolism	17 (0.4%)	0.231686	0.44714	ko00051	Metabolism	Carbohydrate metabolism
158	Notch signaling pathway	40 (0.95%)	0.233385	0.447567	ko04330	Environmental Information Processing	Signal transduction
159	Synaptic vesicle cycle	26 (0.62%)	0.241667	0.460536	ko04721	Organismal Systems	Nervous system
160	PI3K-Akt signaling pathway	205 (4.88%)	0.249034	0.471609	ko04151	Environmental Information Processing	Signal transduction
161	Apoptosis	46 (1.09%)	0.255979	0.481271	ko04210	Cellular Processes	Cell growth and death
162	Thyroid cancer	33 (0.78%)	0.257313	0.481271	ko05216	Human Diseases	Cancers: Specific types
163	Prolactin signaling pathway	33 (0.78%)	0.272838	0.507178	ko04917	Organismal Systems	Endocrine system
164	Chronic myeloid leukemia	46 (1.09%)	0.275485	0.508975	ko05220	Human Diseases	Cancers: Specific types
165	Cyanoamino acid metabolism	4 (0.1%)	0.282231	0.518279	ko00460	Metabolism	Metabolism of other amino acids
166	Insect hormone biosynthesis	2 (0.05%)	0.286525	0.522995	ko00981	Metabolism	Metabolism of terpenoids and polyketides
167	One carbon pool by folate	29 (0.69%)	0.292408	0.530537	ko00670	Metabolism	Metabolism of cofactors and vitamins
168	Gap junction	55 (1.31%)	0.30889	0.557106	ko04540	Cellular Processes	Cellular community
169	Hepatitis B	74 (1.76%)	0.314509	0.558582	ko05161	Human Diseases	Infectious diseases: Viral
170	RNA polymerase	25 (0.59%)	0.314622	0.558582	ko03020	Genetic Information Processing	Transcription
171	Alcoholism	50 (1.19%)	0.316644	0.558582	ko05034	Human Diseases	Substance dependence
172	Estrogen signaling pathway	57 (1.36%)	0.318274	0.558582	ko04915	Organismal Systems	Endocrine system
173	Cytosolic DNA-sensing pathway	18 (0.43%)	0.321615	0.558582	ko04623	Organismal Systems	Immune system
174	Mismatch repair	11 (0.26%)	0.322743	0.558582	ko03430	Genetic Information Processing	Replication and repair
175	Cardiac muscle contraction	36 (0.86%)	0.324832	0.558582	ko04260	Organismal Systems	Circulatory system
176	Protein digestion and absorption	65 (1.55%)	0.329154	0.558582	ko04974	Organismal Systems	Digestive system
177	Salmonella infection	65 (1.55%)	0.329154	0.558582	ko05132	Human Diseases	Infectious diseases: Bacterial
178	Fc epsilon RI signaling pathway	33 (0.78%)	0.329805	0.558582	ko04664	Organismal Systems	Immune system
179	Central carbon metabolism in cancer	42 (1%)	0.329987	0.558582	ko05230	Human Diseases	Cancers: Overview
180	Insulin signaling pathway	88 (2.09%)	0.333842	0.561967	ko04910	Organismal Systems	Endocrine system
181	Adipocytokine signaling pathway	38 (0.9%)	0.337165	0.564426	ko04920	Organismal Systems	Endocrine system
182	Choline metabolism in cancer	62 (1.47%)	0.365086	0.605749	ko05231	Human Diseases	Cancers: Overview
183	African trypanosomiasis	24 (0.57%)	0.365849	0.605749	ko05143	Human Diseases	Infectious diseases: Parasitic
184	Collecting duct acid secretion	9 (0.21%)	0.371512	0.611783	ko04966	Organismal Systems	Excretory system
185	NF-kappa B signaling pathway	74 (1.76%)	0.375931	0.615715	ko04064	Environmental Information Processing	Signal transduction
186	Bladder cancer	34 (0.81%)	0.378569	0.616702	ko05219	Human Diseases	Cancers: Specific types
187	Non-alcoholic fatty liver disease (NAFLD)	53 (1.26%)	0.384997	0.621794	ko04932	Human Diseases	Endocrine and metabolic diseases
188	Thyroid hormone synthesis	40 (0.95%)	0.387852	0.621794	ko04918	Organismal Systems	Endocrine system
189	Renal cell carcinoma	40 (0.95%)	0.387852	0.621794	ko05211	Human Diseases	Cancers: Specific types
190	HIF-1 signaling pathway	56 (1.33%)	0.391315	0.624045	ko04066	Environmental Information Processing	Signal transduction
191	Colorectal cancer	37 (0.88%)	0.404082	0.64103	ko05210	Human Diseases	Cancers: Specific types
192	Phospholipase D signaling pathway	82 (1.95%)	0.409237	0.645205	ko04072	Environmental Information Processing	Signal transduction
193	Pathways in cancer	266 (6.33%)	0.410973	0.645205	ko05200	Human Diseases	Cancers: Overview
194	Renin-angiotensin system	6 (0.14%)	0.41609	0.649872	ko04614	Organismal Systems	Endocrine system
195	Circadian entrainment	55 (1.31%)	0.42075	0.653781	ko04713	Organismal Systems	Environmental adaptation
196	TNF signaling pathway	64 (1.52%)	0.435672	0.670988	ko04668	Environmental Information Processing	Signal transduction
197	Folate biosynthesis	6 (0.14%)	0.437938	0.670988	ko00790	Metabolism	Metabolism of cofactors and vitamins
198	Proteoglycans in cancer	198 (4.71%)	0.438601	0.670988	ko05205	Human Diseases	Cancers: Overview
199	Pancreatic cancer	36 (0.86%)	0.440682	0.670988	ko05212	Human Diseases	Cancers: Specific types
200	N-Glycan biosynthesis	16 (0.38%)	0.449891	0.681083	ko00510	Metabolism	Glycan biosynthesis and metabolism
201	Measles	65 (1.55%)	0.451807	0.681083	ko05162	Human Diseases	Infectious diseases: Viral
202	Axon guidance	149 (3.54%)	0.457743	0.686614	ko04360	Organismal Systems	Development
203	Biotin metabolism	1 (0.02%)	0.464951	0.691929	ko00780	Metabolism	Metabolism of cofactors and vitamins
204	Fc gamma R-mediated phagocytosis	58 (1.38%)	0.465853	0.691929	ko04666	Organismal Systems	Immune system
205	Huntington's disease	82 (1.95%)	0.487323	0.713473	ko05016	Human Diseases	Neurodegenerative diseases
206	Spliceosome	82 (1.95%)	0.487323	0.713473	ko03040	Genetic Information Processing	Transcription
207	Degradation of aromatic compounds	3 (0.07%)	0.487422	0.713473	ko01220	Metabolism	Global and overview maps
208	Endocytosis	155 (3.69%)	0.49527	0.721475	ko04144	Cellular Processes	Transport and catabolism
209	ABC transporters	20 (0.48%)	0.500615	0.721794	ko02010	Environmental Information Processing	Membrane transport
210	Aldosterone-regulated sodium reabsorption	18 (0.43%)	0.500765	0.721794	ko04960	Organismal Systems	Excretory system
211	D-Glutamine and D-glutamate metabolism	2 (0.05%)	0.502635	0.721794	ko00471	Metabolism	Metabolism of other amino acids
212	TGF-beta signaling pathway	31 (0.74%)	0.522546	0.744561	ko04350	Environmental Information Processing	Signal transduction
213	Acute myeloid leukemia	29 (0.69%)	0.523404	0.744561	ko05221	Human Diseases	Cancers: Specific types
214	NOD-like receptor signaling pathway	64 (1.52%)	0.536566	0.759717	ko04621	Organismal Systems	Immune system
215	Vibrio cholerae infection	36 (0.86%)	0.541474	0.763101	ko05110	Human Diseases	Infectious diseases: Bacterial
216	Carbohydrate digestion and absorption	18 (0.43%)	0.547886	0.766148	ko04973	Organismal Systems	Digestive system
217	Calcium signaling pathway	80 (1.9%)	0.549046	0.766148	ko04020	Environmental Information Processing	Signal transduction
218	Amyotrophic lateral sclerosis (ALS)	34 (0.81%)	0.551222	0.766148	ko05014	Human Diseases	Neurodegenerative diseases
219	Cocaine addiction	18 (0.43%)	0.559454	0.774038	ko05030	Human Diseases	Substance dependence
220	Cytokine-cytokine receptor interaction	64 (1.52%)	0.5675	0.781602	ko04060	Environmental Information Processing	Signaling molecules and interaction
221	Riboflavin metabolism	2 (0.05%)	0.576713	0.790697	ko00740	Metabolism	Metabolism of cofactors and vitamins
222	RIG-I-like receptor signaling pathway	30 (0.71%)	0.581319	0.793361	ko04622	Organismal Systems	Immune system
223	Taste transduction	15 (0.36%)	0.583893	0.793361	ko04742	Organismal Systems	Sensory system
224	Sphingolipid signaling pathway	58 (1.38%)	0.608959	0.821698	ko04071	Environmental Information Processing	Signal transduction
225	Sulfur relay system	2 (0.05%)	0.610599	0.821698	ko04122	Genetic Information Processing	Folding, sorting and degradation
226	Hepatitis C	52 (1.24%)	0.614921	0.821698	ko05160	Human Diseases	Infectious diseases: Viral
227	Circadian rhythm	18 (0.43%)	0.615596	0.821698	ko04710	Organismal Systems	Environmental adaptation
228	Non-small cell lung cancer	28 (0.67%)	0.619869	0.823219	ko05223	Human Diseases	Cancers: Specific types
229	Glucagon signaling pathway	53 (1.26%)	0.623524	0.823219	ko04922	Organismal Systems	Endocrine system
230	Ubiquinone and other terpenoid-quinone biosynthesis	4 (0.1%)	0.624886	0.823219	ko00130	Metabolism	Metabolism of cofactors and vitamins
231	Cholinergic synapse	47 (1.12%)	0.637564	0.834399	ko04725	Organismal Systems	Nervous system
232	Tight junction	82 (1.95%)	0.63888	0.834399	ko04530	Cellular Processes	Cellular community
233	Phototransduction	11 (0.26%)	0.652407	0.847558	ko04744	Organismal Systems	Sensory system
234	VEGF signaling pathway	29 (0.69%)	0.655833	0.847558	ko04370	Environmental Information Processing	Signal transduction
235	Melanoma	39 (0.93%)	0.657347	0.847558	ko05218	Human Diseases	Cancers: Specific types
236	Vascular smooth muscle contraction	83 (1.97%)	0.675341	0.857865	ko04270	Organismal Systems	Circulatory system
237	Lysine biosynthesis	1 (0.02%)	0.675601	0.857865	ko00300	Metabolism	Amino acid metabolism
238	D-Arginine and D-ornithine metabolism	1 (0.02%)	0.675601	0.857865	ko00472	Metabolism	Metabolism of other amino acids
239	Melanogenesis	47 (1.12%)	0.676665	0.857865	ko04916	Organismal Systems	Endocrine system
240	Focal adhesion	170 (4.04%)	0.68701	0.866797	ko04510	Cellular Processes	Cellular community
241	Aminoacyl-tRNA biosynthesis	12 (0.29%)	0.689433	0.866797	ko00970	Genetic Information Processing	Translation
242	Regulation of autophagy	9 (0.21%)	0.694421	0.869461	ko04140	Cellular Processes	Transport and catabolism
243	Insulin resistance	64 (1.52%)	0.710182	0.885535	ko04931	Human Diseases	Endocrine and metabolic diseases
244	Gastric acid secretion	40 (0.95%)	0.731816	0.906489	ko04971	Organismal Systems	Digestive system
245	p53 signaling pathway	29 (0.69%)	0.73297	0.906489	ko04115	Cellular Processes	Cell growth and death
246	AMPK signaling pathway	60 (1.43%)	0.736802	0.907524	ko04152	Environmental Information Processing	Signal transduction
247	Alzheimer's disease	79 (1.88%)	0.740149	0.907956	ko05010	Human Diseases	Neurodegenerative diseases
248	Butirosin and neomycin biosynthesis	1 (0.02%)	0.747412	0.910324	ko00524	Metabolism	Biosynthesis of other secondary metabolites
249	Vasopressin-regulated water reabsorption	15 (0.36%)	0.748088	0.910324	ko04962	Organismal Systems	Excretory system
250	Aldosterone synthesis and secretion	44 (1.05%)	0.763008	0.924766	ko04925	Organismal Systems	Endocrine system
251	Amphetamine addiction	25 (0.59%)	0.776064	0.934391	ko05031	Human Diseases	Substance dependence
252	Lipoic acid metabolism	1 (0.02%)	0.777117	0.934391	ko00785	Metabolism	Metabolism of cofactors and vitamins
253	RNA degradation	27 (0.64%)	0.78781	0.943503	ko03018	Genetic Information Processing	Folding, sorting and degradation
254	Signaling pathways regulating pluripotency of stem cells	52 (1.24%)	0.795511	0.94633	ko04550	Cellular Processes	Cellular community
255	Selenocompound metabolism	3 (0.07%)	0.796416	0.94633	ko00450	Metabolism	Metabolism of other amino acids
256	Prostate cancer	51 (1.21%)	0.799942	0.946806	ko05215	Human Diseases	Cancers: Specific types
257	FoxO signaling pathway	60 (1.43%)	0.806123	0.950016	ko04068	Environmental Information Processing	Signal transduction
258	GnRH signaling pathway	47 (1.12%)	0.808925	0.950016	ko04912	Organismal Systems	Endocrine system
259	Jak-STAT signaling pathway	47 (1.12%)	0.813513	0.951716	ko04630	Environmental Information Processing	Signal transduction
260	Type II diabetes mellitus	16 (0.38%)	0.819828	0.95333	ko04930	Human Diseases	Endocrine and metabolic diseases
261	Adrenergic signaling in cardiomyocytes	73 (1.74%)	0.821185	0.95333	ko04261	Organismal Systems	Circulatory system
262	Ribosome	23 (0.55%)	0.829706	0.956943	ko03010	Genetic Information Processing	Translation
263	Insulin secretion	37 (0.88%)	0.830614	0.956943	ko04911	Organismal Systems	Endocrine system
264	Oxytocin signaling pathway	81 (1.93%)	0.83689	0.960522	ko04921	Organismal Systems	Endocrine system
265	Inositol phosphate metabolism	33 (0.78%)	0.847827	0.969402	ko00562	Metabolism	Carbohydrate metabolism
266	Other types of O-glycan biosynthesis	10 (0.24%)	0.86141	0.971518	ko00514	Metabolism	Glycan biosynthesis and metabolism
267	Non-homologous end-joining	3 (0.07%)	0.864601	0.971518	ko03450	Genetic Information Processing	Replication and repair
268	Ras signaling pathway	91 (2.16%)	0.865196	0.971518	ko04014	Environmental Information Processing	Signal transduction
269	Long-term potentiation	36 (0.86%)	0.866507	0.971518	ko04720	Organismal Systems	Nervous system
270	Synthesis and degradation of ketone bodies	2 (0.05%)	0.870762	0.971518	ko00072	Metabolism	Lipid metabolism
271	MicroRNAs in cancer	116 (2.76%)	0.872114	0.971518	ko05206	Human Diseases	Cancers: Overview
272	Glioma	31 (0.74%)	0.872122	0.971518	ko05214	Human Diseases	Cancers: Specific types
273	Neurotrophin signaling pathway	47 (1.12%)	0.88339	0.980465	ko04722	Organismal Systems	Nervous system
274	Adherens junction	82 (1.95%)	0.887998	0.981044	ko04520	Cellular Processes	Cellular community
275	Phosphatidylinositol signaling system	46 (1.09%)	0.890386	0.981044	ko04070	Environmental Information Processing	Signal transduction
276	mTOR signaling pathway	27 (0.64%)	0.894263	0.981705	ko04150	Environmental Information Processing	Signal transduction
277	Endometrial cancer	29 (0.69%)	0.898331	0.981705	ko05213	Human Diseases	Cancers: Specific types
278	Serotonergic synapse	53 (1.26%)	0.900706	0.981705	ko04726	Organismal Systems	Nervous system
279	Progesterone-mediated oocyte maturation	35 (0.83%)	0.909775	0.984789	ko04914	Organismal Systems	Endocrine system
280	Nicotinate and nicotinamide metabolism	10 (0.24%)	0.910036	0.984789	ko00760	Metabolism	Metabolism of cofactors and vitamins
281	Inflammatory mediator regulation of TRP channels	43 (1.02%)	0.915633	0.987319	ko04750	Organismal Systems	Sensory system
282	Ubiquitin mediated proteolysis	51 (1.21%)	0.919545	0.988022	ko04120	Genetic Information Processing	Folding, sorting and degradation
283	Phototransduction - fly	12 (0.29%)	0.943875	0.999961	ko04745	Organismal Systems	Sensory system
284	Vitamin B6 metabolism	1 (0.02%)	0.95035	0.999961	ko00750	Metabolism	Metabolism of cofactors and vitamins
285	Dopaminergic synapse	42 (1%)	0.950666	0.999961	ko04728	Organismal Systems	Nervous system
286	Nucleotide excision repair	12 (0.29%)	0.952626	0.999961	ko03420	Genetic Information Processing	Replication and repair
287	Transcriptional misregulation in cancer	78 (1.85%)	0.953845	0.999961	ko05202	Human Diseases	Cancers: Overview
288	Hippo signaling pathway - fly	33 (0.78%)	0.957916	0.999961	ko04391	Environmental Information Processing	Signal transduction
289	cAMP signaling pathway	87 (2.07%)	0.968878	0.999961	ko04024	Environmental Information Processing	Signal transduction
290	ErbB signaling pathway	29 (0.69%)	0.971098	0.999961	ko04012	Environmental Information Processing	Signal transduction
291	Circadian rhythm - fly	2 (0.05%)	0.977446	0.999961	ko04711	Organismal Systems	Environmental adaptation
292	Homologous recombination	4 (0.1%)	0.984564	0.999961	ko03440	Genetic Information Processing	Replication and repair
293	Glutamatergic synapse	41 (0.98%)	0.984929	0.999961	ko04724	Organismal Systems	Nervous system
294	MAPK signaling pathway	79 (1.88%)	0.987042	0.999961	ko04010	Environmental Information Processing	Signal transduction
295	Chemokine signaling pathway	64 (1.52%)	0.987436	0.999961	ko04062	Organismal Systems	Immune system
296	Basal cell carcinoma	7 (0.17%)	0.988819	0.999961	ko05217	Human Diseases	Cancers: Specific types
297	Hedgehog signaling pathway	7 (0.17%)	0.990438	0.999961	ko04340	Environmental Information Processing	Signal transduction
298	Glycosaminoglycan biosynthesis - chondroitin sulfate / dermatan sulfate	1 (0.02%)	0.994785	0.999961	ko00532	Metabolism	Glycan biosynthesis and metabolism
299	Oocyte meiosis	37 (0.88%)	0.995968	0.999961	ko04114	Cellular Processes	Cell growth and death
300	Fanconi anemia pathway	9 (0.21%)	0.999154	0.999961	ko03460	Genetic Information Processing	Replication and repair
301	Cell cycle	28 (0.67%)	0.999735	0.999961	ko04110	Cellular Processes	Cell growth and death
302	DNA replication	2 (0.05%)	0.999766	0.999961	ko03030	Genetic Information Processing	Replication and repair
303	Wnt signaling pathway	33 (0.78%)	0.999961	0.999961	ko04310	Environmental Information Processing	Signal transduction
